# Supplementary material for: Multiple abiotic stimuli are integrated in the regulation of rice gene expression under field conditions
Source: eLife. 2015 Nov 26;4:e08411. doi: 10.7554/eLife.08411 (PMC4718725; doi:10.7554/eLife.08411)
Supplement: Supplementary file 1. — DOI: http://dx.doi.org/10.7554/eLife.08411.011 [file elife-08411-supp1.xlsx]

## Sheet: A
Supplementary file 1A: scaled and centered expression profiles for the 53 cluster means in the two-season analysis
Cluster	irr.dry.1	irr.dry.2	irr.dry.3	irr.dry.4	irr.dry.5	irr.dry.6	irr.dry.7	irr.dry.8	irr.dry.9	irr.dry.10	irr.dry.11	irr.dry.12	irr.dry.13	irr.dry.14	irr.dry.15	rainf.dry.1	rainf.dry.2	rainf.dry.3	rainf.dry.4	rainf.dry.5	rainf.dry.6	rainf.dry.7	rainf.dry.8	rainf.dry.9	rainf.dry.10	rainf.dry.11	rainf.dry.12	rainf.dry.13	rainf.dry.14	rainf.dry.15	irr.wet.1	irr.wet.2	irr.wet.3	irr.wet.4	irr.wet.5	irr.wet.6	irr.wet.7	irr.wet.8	irr.wet.9	irr.wet.10	irr.wet.11	irr.wet.12	irr.wet.13	irr.wet.14	irr.wet.15	rainf.wet.1	rainf.wet.2	rainf.wet.3	rainf.wet.4
1	1.30383	1.1653	0.89738	0.556716	0.963918	0.931319	0.880218	0.56647	1.28162	1.30577	0.570138	0.937984	0.327999	-0.0383373	-0.503206	1.15642	1.03806	0.255552	-0.0657934	-0.00198693	-0.295843	-0.904838	-1.22645	-1.15165	-1.10132	-1.68287	-1.47247	-1.6037	-1.8503	-2.23992	1.53631	1.38055	1.4142	1.2229	0.983	0.676208	0.96398	0.743256	-0.057802	-0.466536	-0.182976	-0.498287	-0.458266	-0.643579	-1.80022	0.605171	0.114039	0.708354	0.624414
2	-0.632313	-0.661072	-0.896545	-0.498484	-1.41252	-1.32241	-0.854297	-0.891276	-1.52419	-1.52913	-0.778279	-1.17023	-0.419444	-0.359568	-0.259576	-0.617119	-0.268743	0.185946	0.327604	0.458586	0.606679	1.01441	1.10721	1.09522	1.11217	1.69904	1.41628	1.62306	1.77623	1.67275	-1.51915	-1.05952	-1.77041	-1.15785	-0.980903	-0.846821	-1.03731	-0.846716	-0.210757	0.177369	0.00441009	0.190215	0.124254	0.612208	1.0248	-0.703872	0.08463	-1.00208	-0.560533
3	-1.01156	-1.17357	-1.76177	-1.39058	-1.16444	-1.28523	-1.14427	-1.24649	-1.35871	-1.36139	-0.870531	-0.771893	-0.411154	-0.440267	-0.508543	-0.323732	-0.449265	-0.272046	-0.0214029	0.671218	0.741652	1.22911	1.54805	1.4671	1.60025	1.84564	2.07949	2.24339	2.12392	1.41702	-1.07979	-1.09639	-0.743516	-0.609527	-0.779484	-0.573239	-0.991092	-0.478129	-0.0959154	-0.0367321	-0.118251	-0.0268683	0.257668	0.486676	0.538351	-0.262581	-0.0478975	-0.0348497	-0.0220987
4	0.173772	0.0851767	-0.769656	-0.484558	-1.16606	-0.944629	-0.441528	-0.874438	-1.43894	-1.53713	-1.37988	-1.26334	-0.325591	-1.19884	-1.84331	-0.298421	0.305395	0.311605	0.466897	0.518708	1.06747	1.29229	1.08166	1.25867	1.181	1.45193	1.17997	1.68355	1.36914	0.539106	-1.41175	-0.778467	-1.27394	-0.777999	-0.648426	-0.889021	-1.08234	-0.890819	-0.111498	-0.468726	-0.154361	0.0836315	0.25663	0.309706	-1.2651	-0.378483	0.737205	-0.504431	-0.0417216
5	0.815543	0.660066	0.976708	0.644624	1.0381	0.89244	0.782158	0.797193	1.53896	1.71357	0.970958	1.19421	0.388472	0.872262	0.938289	0.94145	0.485044	0.0701789	-0.171452	-0.375275	-0.973884	-1.31255	-1.44471	-1.46841	-1.31271	-1.79285	-1.74904	-2.13811	-1.82259	-1.15864	1.48153	1.13235	1.22001	0.970497	0.936661	0.721309	0.984015	0.780185	0.0258212	0.164114	0.101033	-0.264308	-0.420881	-0.410383	-0.650753	0.503419	-0.219932	0.465832	0.36529
6	0.0874984	0.220422	-0.563915	0.0437755	-0.962315	-1.00955	-0.340692	-0.584739	-1.63424	-1.82315	-1.36906	-1.45479	-0.542939	-0.879221	-0.902085	-1.05166	0.0909424	0.332073	0.483665	0.229532	0.888703	1.24913	0.944428	1.0803	0.943231	1.57938	1.09916	1.57418	1.44428	0.827662	-1.76623	-1.17459	-1.10614	-0.93048	-0.965372	-0.853091	-1.14002	-0.771222	-0.246434	-0.0102581	-0.18744	0.241678	0.291055	0.691011	0.296276	-0.647487	0.45981	-1.04673	-0.859798
7	0.476507	0.845323	0.00414503	0.540981	-1.00661	-0.354275	0.0452414	-0.349768	-0.926572	-1.42232	-1.88554	-1.80753	-0.310128	-1.14352	-1.64745	-0.810463	0.526966	0.748033	1.23874	-0.360092	1.0971	1.18902	0.643207	0.887847	0.695989	1.08328	0.198296	0.986543	0.772067	0.0449725	-1.72716	-0.962407	-1.33894	-1.17716	-0.62003	-0.729982	-0.804575	-1.02842	0.059316	-0.365018	-0.0081176	0.52093	0.402606	0.315764	-0.717466	-0.806086	1.22069	-1.02017	-0.607362
8	-1.62858	-1.35546	-0.86336	-0.970608	-0.576646	-1.06589	-1.14361	-0.728534	-0.397638	-0.438234	0.772008	-0.204415	-0.335403	0.464012	1.68801	-1.06689	-0.994296	-0.320114	-0.287401	0.101247	-0.493119	0.38077	0.769257	0.707737	0.565725	1.53569	1.48022	1.38161	1.44559	1.57832	-0.636661	-1.23563	-0.670033	-0.75651	-0.730104	-0.247582	-0.567767	-0.0713694	0.0418592	1.06511	0.0663055	-0.0541877	0.166133	0.522468	3.42891	-0.495625	-0.715179	-0.292831	-0.357063
9	0.0795831	0.178205	-1.02119	-1.38177	-0.397234	0.184057	-0.408417	-0.29907	0.468511	0.107365	-1.33789	0.167411	0.143987	-1.20126	-2.36103	0.327942	0.785414	-0.228468	-0.437558	0.704352	1.29661	0.616977	0.900971	1.22667	0.960273	-0.273325	1.02487	1.47319	0.473377	-1.77255	0.243499	0.435222	0.786938	0.663862	0.426582	0.425909	0.234398	0.2672	-0.306299	-1.41846	-1.07443	-0.569891	0.0512636	-0.478679	-3.00242	0.704205	0.382223	1.05207	0.796778
10	-1.3724	-1.31207	-0.972319	-0.477751	-0.79599	-0.755748	-0.74021	-0.108165	-1.26539	-1.25203	-0.290819	-0.764324	-0.342722	0.472028	0.89723	-1.55587	-1.48372	-0.332543	-0.0578464	0.156971	0.293444	0.730731	1.12965	0.894986	1.04791	1.6701	1.40151	1.39501	1.73654	2.05379	-1.48103	-1.49254	-1.25261	-0.978737	-0.91925	-0.619761	-0.549033	-0.526944	0.317125	0.790433	0.267078	0.497049	0.500343	0.980235	2.03501	-0.626064	-0.605315	-1.31965	-1.03107
11	1.44961	1.29446	0.619758	0.485665	0.506974	0.613642	0.689761	0.472538	1.09284	1.2161	-0.45043	0.577816	0.182135	0.0423594	-0.642929	1.00262	1.2561	0.35274	0.107481	0.0527856	0.0244574	-0.775216	-1.07816	-0.915976	-0.664059	-1.78887	-1.44899	-1.56669	-1.32578	-1.38273	1.28568	1.34047	1.23647	1.10824	0.94818	0.510404	0.846324	0.480949	-0.546121	-0.901918	-0.667274	-0.718008	-0.763019	-0.593871	-3.12606	0.869329	0.305461	0.415555	0.500077
12	-0.792374	-0.980597	-1.58417	-1.61977	-1.0162	-0.929346	-1.06138	-1.22033	-0.9849	-1.10933	-0.927457	-0.50969	-0.247417	-1.12102	-2.22609	0.45746	0.43686	0.141031	0.159952	1.19991	1.34915	1.39087	1.53652	1.48852	1.38537	1.34375	1.84862	2.12345	1.64803	-0.179413	-0.590626	-0.381993	-0.211095	0.0132782	-0.374172	-0.34006	-0.613064	-0.285066	-0.114842	-0.775786	-0.5726	-0.45933	-0.0560347	0.00898145	-1.61182	0.439138	0.494795	0.745817	0.754464
13	0.832633	0.788784	1.08781	0.98927	0.721143	0.62429	0.750109	0.437106	1.34309	1.16055	0.865949	0.682213	0.0594606	0.0893609	0.698546	1.29438	0.868604	0.397709	0.343577	-0.492055	-0.831896	-1.22945	-1.32712	-1.42676	-1.17851	-1.41508	-1.69171	-1.79663	-1.70666	-0.938712	1.47837	1.10879	1.3029	1.00605	0.94614	0.672724	1.13935	0.780154	0.0927982	0.00935359	0.250301	-0.287159	-0.449163	-0.611847	0.324536	0.205471	-0.00345622	0.66955	0.354915
14	0.144055	0.235236	1.04582	0.838669	1.0209	0.835286	0.760712	0.952114	1.60779	1.61761	1.37467	1.16114	0.522448	1.19563	1.84696	0.223137	-0.28879	-0.196849	-0.220891	-0.789298	-1.3434	-1.35054	-1.4085	-1.40846	-1.45698	-1.35053	-1.62042	-1.84957	-1.6355	-0.462476	1.03264	0.596003	0.812019	0.545154	0.657761	0.630511	0.930056	0.734289	0.260329	0.657166	0.520261	0.164922	-0.0117842	-0.0699809	1.09848	-0.0151902	-0.523723	0.194374	-0.0271747
15	0.366372	0.345615	0.209285	-0.573905	0.628761	1.01556	0.378004	0.696464	1.24092	1.45934	0.054312	1.15853	0.602008	0.11989	-1.16538	0.838101	0.443341	-0.197456	-0.462951	0.178976	0.240785	-0.38728	-0.416065	-0.312841	-0.468331	-1.3778	-0.545243	-0.655473	-1.12808	-2.28546	1.08578	1.10802	0.875916	0.866042	0.713423	0.675851	0.466694	0.547652	0.137214	-0.640617	-0.232995	-0.0785972	0.11855	-0.451555	-3.22594	0.832404	0.437039	1.00839	0.859062
16	-2.69755	-2.76661	-1.3953	-1.95715	-0.83402	-1.03095	-1.38193	-0.73722	-0.164085	0.258362	0.637055	0.450086	0.487322	1.11313	0.887192	-0.532215	-1.83473	-0.449373	-0.0883009	0.00436139	-0.293486	0.694371	1.45529	1.12798	1.18495	1.47629	1.57582	1.40746	1.54065	1.8626	-0.280199	-0.804702	-1.06397	-0.859257	-0.421958	-0.0377631	-0.639404	-0.00824204	0.43984	0.57878	0.531896	0.490938	0.358805	0.197625	0.393185	0.232149	0.112276	0.34617	0.561944
17	-0.664043	-0.68847	0.419151	-0.38622	0.750782	1.00202	0.384337	1.01097	1.68727	2.03981	1.09929	1.68771	0.88615	1.19561	0.945435	0.726597	-0.266762	-0.221751	-0.382705	-0.449329	-0.710655	-0.838012	-0.736792	-0.810848	-1.0053	-1.61864	-0.983717	-1.26792	-1.54595	-1.25803	1.15003	0.875154	0.584444	0.536651	0.702296	0.795989	0.563336	0.697792	0.511938	0.0339328	0.470578	0.326296	0.208646	-0.417164	-1.33115	0.752598	0.126645	1.03944	0.902027
18	1.64786	1.53251	0.568147	0.195508	0.62202	0.725379	0.847091	0.17931	0.488533	0.401807	-0.10006	0.333989	0.22809	-1.02918	-2.65479	0.989004	1.29466	0.391702	-0.0511478	0.482279	0.56619	-0.0261649	-0.671665	-0.448288	-0.612161	-0.825075	-0.713207	-0.49384	-1.24083	-2.62768	0.84394	1.13315	1.02143	1.11607	0.517018	0.325721	0.409322	0.248971	-0.211057	-1.16939	-0.642942	-0.843857	-0.249453	-0.358974	-3.24739	0.431902	0.395034	0.636002	0.660883
19	1.80738	1.8629	1.58861	1.62838	1.25229	1.26793	1.40801	1.25834	1.09275	0.980548	0.473279	0.483213	0.302138	0.326541	-0.0184787	0.436767	0.564809	0.32387	0.00266219	-0.55584	-0.693016	-1.18047	-1.75621	-1.58946	-1.68049	-1.77468	-2.19498	-2.34401	-2.09388	-1.1789	0.744858	1.03956	0.843921	0.669191	0.604186	0.581168	0.926103	0.359523	-0.110501	-0.0390619	-0.0375362	-0.142182	-0.0827721	-0.0403949	-0.680685	-0.0783992	-0.202623	-0.308432	-0.420478
20	0.220347	0.846891	0.217578	0.937846	-0.768337	0.0730649	0.233634	0.143883	0.00438481	-0.860118	-2.22665	-2.15064	-0.166266	-0.904555	-1.10446	-0.984274	0.281792	0.705973	1.61003	-0.937656	1.04261	0.918829	0.419966	0.66388	0.530727	0.769692	-0.380906	0.640929	0.348094	-0.12629	-1.44469	-1.28991	-1.36526	-1.60752	-0.497439	-0.509506	-0.225845	-0.646269	0.457846	-0.483983	-0.127001	0.723563	0.671549	0.0889506	0.0137369	-1.12345	1.39988	-1.00684	-0.803071
21	-0.945412	-0.717356	0.106269	0.164475	0.0450415	-0.308997	-0.324493	0.221698	0.138108	-0.0074993	1.02364	0.0038219	-0.175236	0.871284	2.40323	-0.68619	-0.964442	-0.27388	-0.233154	-0.50061	-1.05983	-0.468512	-0.13564	-0.435899	-0.295715	0.578101	0.166214	-0.0840293	0.383898	1.51112	-0.213516	-0.828366	-0.431189	-0.479139	-0.470001	-0.130315	0.145284	0.127229	0.445503	1.33681	0.506689	0.312765	0.284407	0.46559	4.10186	-0.739921	-0.934708	-0.51031	-0.828495
22	-2.23744	-2.57565	-1.41166	-2.25412	-0.984218	-0.246798	-1.05788	-0.497039	0.0500637	0.502427	0.176147	0.700333	0.60667	0.695502	-0.479212	0.0162668	-0.933254	-0.0103732	0.0626136	0.380597	0.386786	0.881242	1.33117	1.19174	0.817408	0.923199	1.38267	1.49133	0.852056	0.239428	0.00766643	-0.376866	-1.02108	-0.484511	-0.327066	0.0878025	-0.926179	-0.167754	0.166186	-0.516677	0.0333995	0.339214	0.180582	-0.119469	-1.43394	0.719264	0.549721	0.989517	1.149
23	-0.483246	-0.103379	-0.613872	0.310639	-0.184865	-0.080283	0.011217	0.866786	-0.887805	-1.28256	-0.946508	-0.984	-0.157678	0.519323	0.829976	-2.45526	-1.74823	-0.712273	-0.515651	-0.152022	0.0668384	0.474578	0.706917	0.645971	0.753885	1.11083	0.878318	1.01668	1.23619	1.87948	-1.41752	-1.20511	-1.04727	-0.902598	-0.677165	-0.137466	-0.00226103	-0.250229	0.82431	1.10905	0.706962	0.959797	1.26021	1.23217	2.12306	-1.9756	-0.97636	-1.44898	-1.58869
24	-0.437939	-0.214247	0.18681	0.244476	-0.412548	-0.700373	-0.295624	-0.163361	-0.574557	-0.481471	0.515668	-0.439634	-0.335569	0.862423	1.79935	-1.2995	-0.685552	0.367144	0.0507565	-0.188601	-0.497484	-0.0627644	-0.202454	-0.188969	-0.272968	0.946865	0.02056	-0.130893	0.461791	2.12866	-1.38294	-0.90935	-1.65998	-1.26514	-0.880819	-0.569342	-0.26866	-0.644288	-0.292233	1.25781	0.253925	0.182609	-0.0952437	0.782996	3.50171	-0.929551	-0.825038	-1.79349	-1.24489
25	-2.62461	-2.80415	-0.28555	-1.63521	0.059087	0.488886	-0.567983	0.16627	1.25264	1.69838	1.50242	1.77496	1.32379	1.40533	0.736188	1.22955	-0.927699	0.0419233	0.0960505	-0.236536	-0.26303	-0.207453	0.197241	-0.0821632	-0.221789	-0.603996	-0.0619798	-0.148335	-0.802564	-0.499668	0.554481	0.151762	-0.401189	-0.0556943	0.106382	0.386472	-0.260172	0.217546	0.473819	0.0484172	0.569842	0.538504	0.224586	-0.350603	-0.893231	0.687903	0.444827	1.23221	1.12307
26	-1.49937	-1.93914	-1.46326	-1.49647	-1.33053	-1.4659	-1.35814	-1.10075	-1.04424	-0.805692	-0.111482	-0.303915	-0.0219294	0.456486	0.559366	-0.0284746	-0.644243	0.256764	0.38874	0.487879	0.158378	0.817459	1.23014	1.05207	0.965337	1.575	1.56852	1.60972	1.50639	1.9813	-0.83527	-1.33724	-1.55349	-1.13017	-1.10797	-0.583178	-1.71895	-0.687183	-0.0213448	0.196445	0.0313805	0.074176	0.0404463	0.39877	1.61259	0.298646	-0.130315	0.0192871	0.258286
27	0.203661	0.391931	0.380704	1.04963	0.833521	0.637142	0.885806	1.68581	-0.198251	-0.524591	0.170328	0.0142677	0.355998	1.13798	1.1919	-3.44862	-1.91134	-0.779692	-1.0619	-0.509251	-0.37736	0.0152409	-0.163395	-0.0371675	-0.341377	0.202209	-0.297681	-0.369828	-0.212611	1.07694	-1.39137	-0.638521	-0.987236	-0.89746	-0.559207	0.163649	0.243739	-0.0989019	0.826342	1.19135	0.780343	0.703592	1.08191	1.27787	2.1053	-1.63964	-0.866589	-1.87798	-1.83461
28	-1.24599	-1.08531	0.380828	0.00855499	0.497971	0.145506	-0.243814	0.249087	1.02615	1.14044	1.74655	0.997212	0.164215	1.37562	2.65764	0.03102	-1.03033	-0.2615	-0.294435	-0.6866	-1.58351	-0.954494	-0.546189	-0.683561	-0.728206	-0.202255	-0.33526	-0.867254	-0.390035	0.717951	0.741682	-0.18653	0.259735	-0.0306562	0.254274	0.39644	0.533744	0.585852	0.391393	1.45757	0.693169	0.298575	0.0357294	0.198585	2.67714	-0.0764844	-0.751003	0.170282	-0.0718116
29	-2.90281	-2.87342	-0.890708	-1.51701	-0.384352	-0.542212	-1.19444	-0.469235	0.777861	0.846983	1.17533	0.77224	0.47133	1.11896	1.85164	0.322952	-1.41637	-0.448704	-0.191195	-0.355491	-0.839873	-0.0731117	0.743918	0.47178	0.630102	0.777431	0.943249	0.795873	0.725281	1.67399	0.125274	-0.602046	-0.613966	-0.453845	-0.228705	0.107683	-0.410268	0.102595	0.359394	0.515595	0.386929	0.151274	0.125286	-0.107578	2.02789	0.263625	-0.116918	0.689131	0.483593
30	0.954207	0.999155	1.31492	1.391	0.900762	0.242184	0.889937	0.890106	0.468685	0.739043	1.42956	0.112184	-0.260329	0.787536	1.89441	-0.116033	0.146623	0.340791	0.0155805	-0.66864	-1.3122	-1.26897	-1.59756	-1.67464	-1.65039	-0.782879	-1.73026	-2.05338	-1.34968	0.94828	0.283456	0.191267	-0.129439	-0.0536528	0.163612	0.169836	0.459477	0.0481317	0.112586	1.12248	0.387907	-0.058105	-0.257547	0.0658741	2.70026	-0.528173	-0.696273	-0.943988	-0.89355
31	-0.309319	-0.0919809	-0.227775	0.352787	-0.753714	-0.8982	-0.26408	-0.814778	-1.60048	-1.97957	0.133163	-1.60081	-0.916849	-0.650553	0.057076	-0.205073	0.148343	0.605052	0.676231	0.125415	0.17777	0.706731	0.423855	0.337499	0.27257	1.72701	0.833204	0.970212	1.23357	1.53269	-1.19241	-1.2976	-1.20158	-1.0125	-1.17023	-1.07301	-0.683921	-0.870549	-0.0730795	0.656294	-0.00819152	-0.148749	-0.00172192	0.719907	2.91889	-0.560934	-0.172852	-0.789152	-0.764393
32	0.128069	0.443989	0.86954	1.14416	1.24401	1.42904	1.23113	2.00273	0.984918	0.828495	0.902491	0.871917	0.60452	1.34033	1.64903	-1.67831	-1.80998	-0.894402	-1.05467	-1.00337	-0.852094	-0.902702	-0.739657	-1.01502	-0.993157	-1.05504	-1.01681	-1.28468	-1.14988	-0.224606	0.153674	0.200152	0.365096	0.127779	0.391673	0.616151	0.882207	0.564328	1.02178	1.14508	0.951961	0.889472	1.08241	0.734179	1.74205	-1.10116	-1.00249	-0.815083	-1.41767
33	-0.633727	-0.404302	-1.21996	-1.31197	-0.693599	-0.419676	-0.625466	-0.171979	-0.868674	-0.892646	-1.36435	-0.674723	-0.0273442	-0.34252	-1.16107	-1.77444	-0.62982	-0.420107	-0.69093	0.686116	1.01268	1.2426	1.37949	1.55391	0.942797	1.21364	1.86769	2.36132	1.66934	0.397712	-1.27826	-0.455816	-0.527573	-0.229248	-0.460469	-0.200032	-0.640072	-0.305095	0.218867	-0.479725	-0.314798	-0.030017	0.716488	0.569822	-1.32314	-0.0449892	-0.170861	-0.162929	-0.0643478
34	-0.989716	-1.48565	-0.956547	-0.7112	-1.59202	-1.46862	-1.05916	-1.54038	0.0595432	-0.369559	0.0617639	-0.819596	0.303376	-0.17086	0.0675852	-1.13685	-1.36521	-0.58084	0.64853	-0.335594	-0.0113276	1.09069	1.18811	1.22377	1.45383	1.80437	1.11257	1.61397	1.7753	2.18971	-0.520824	-1.61538	-1.68839	-1.24692	-0.213483	-0.355678	-1.0233	-0.289007	0.678968	0.452045	0.867492	0.439752	0.588973	0.29549	0.490042	-0.602755	0.688638	-0.530451	-0.0762879
35	-0.324661	0.350287	1.34028	0.979319	1.32915	2.2212	1.51522	2.57541	0.429692	-0.049067	-0.0508738	0.852462	0.403003	0.727303	-0.899434	-1.86836	-1.69878	-0.439667	-0.586033	-0.134716	0.86627	-0.0939701	-0.147727	-0.468598	-1.08714	-1.23548	-0.511117	-1.17784	-1.18349	-1.63262	-0.462087	0.330788	0.214126	-0.175995	-0.155439	0.807708	0.762352	0.255995	1.36806	0.0674869	0.622205	0.944471	1.5374	0.902382	-0.570077	0.0186327	-0.370913	-0.15535	-1.12114
36	0.228253	0.272718	-0.31253	0.367431	-0.402538	-0.114015	0.102139	0.278363	-1.54449	-2.08601	-1.50612	-1.28158	-0.627404	-0.669702	-1.08091	-1.07343	-0.769941	0.0569622	0.0631583	0.471293	0.918296	0.711932	0.629524	0.725366	0.64724	1.18821	1.01759	1.14505	1.18467	1.46047	-2.34918	-0.642478	-1.15235	-0.849676	-0.797707	-0.310681	-0.0280821	-0.627609	0.299065	0.218231	0.184453	0.893857	1.24451	1.21338	0.505767	-1.30772	-0.783409	-1.68637	-1.23933
37	1.66666	1.54905	0.243904	0.205186	-0.151404	0.0486346	0.368375	-0.22285	-0.658846	-0.635284	-1.30201	-0.653518	-0.27836	-1.22554	-2.8254	0.231633	1.18042	0.605649	0.306397	0.555443	0.903504	0.521592	-0.112381	0.199687	0.139523	0.0676482	-0.0481138	0.189108	-0.00581631	-0.862891	-0.248697	0.544474	0.250117	0.479067	0.00630974	-0.424583	-0.154326	-0.430885	-0.753816	-1.20247	-0.877819	-0.731894	-0.440572	-0.163235	-3.01373	0.265678	0.618756	-0.356323	0.0937334
38	-0.8916	-1.28295	-1.03823	-1.10666	-0.584202	-1.0062	-0.9471	-0.339244	-0.538732	-0.148798	-0.216579	-0.0490918	0.557021	0.928232	0.180019	-2.71126	-0.941304	0.0432076	0.0303313	0.277492	0.0654223	1.00447	0.905627	1.10875	0.321158	1.20794	1.36652	1.53093	1.00273	1.27211	-1.26032	-1.90789	-1.28474	-1.08818	-1.21353	-0.78918	-1.38495	-0.966723	-0.678183	-0.203568	-0.674792	-0.323603	-0.135873	0.870341	0.127522	0.167443	0.0293363	-0.0411368	0.144332
39	-2.44278	-2.24182	-0.555401	-0.840362	0.25771	0.681932	-0.0640395	1.10915	0.531929	0.7821	0.976736	1.22013	1.07027	1.91736	2.03657	-1.1762	-2.51667	-0.58149	-0.558192	-0.523382	-0.568998	-0.170322	0.208661	0.0791356	-0.141767	0.159299	0.332281	-0.0902168	-0.0555233	1.1639	-0.415565	-0.692507	-0.794188	-0.775408	-0.270224	0.393779	0.10899	0.283191	0.946424	1.30133	1.02795	1.22288	1.29637	0.754671	1.88545	-0.585357	-0.810151	-0.613403	-0.679943
40	0.385804	0.274398	0.0165944	0.320953	0.130162	0.0232739	0.195474	0.0445808	-0.0201398	0.0424023	0.388723	0.162083	0.364521	0.598684	0.45374	-6.76606	-0.0530377	0.547614	0.13009	-0.226459	-0.440414	0.763932	0.293996	0.659475	-1.29926	0.907517	0.673905	1.01878	-0.24753	0.656196	-0.586924	-0.443024	-0.527015	-0.574242	-0.453609	-0.33141	-0.996148	-0.259945	-0.352253	0.17218	-0.166171	-0.0295065	0.154777	0.262773	0.446871	-0.191431	-0.0540467	-0.482799	-0.0569934
41	-1.92824	-1.52947	0.352433	-0.705291	0.307623	0.570921	-0.0861912	0.530976	1.48103	1.8543	1.89957	1.82612	1.0964	1.85141	2.09557	0.86116	-0.22398	0.587004	0.033748	-0.403466	-1.04034	-0.824464	-1.07183	-0.989797	-1.33455	-0.954161	-1.31388	-1.59635	-1.7618	0.41553	0.491629	0.0685049	-0.258167	-0.0923166	0.148511	0.36634	0.212114	0.231888	0.62837	0.980924	0.877567	0.62336	0.247604	-0.0356154	0.786468	0.0685538	-0.296739	0.0756188	0.33836
42	0.736359	1.30637	1.10479	1.71342	1.03244	1.58044	1.35645	2.45123	-0.195409	-0.845146	-0.691614	-0.681477	-0.507345	-0.032338	0.577389	-1.79121	-1.41087	-0.244448	-0.314513	-0.652587	-0.0886391	-0.362742	-0.522758	-0.691625	-0.639998	-0.603771	-0.630857	-0.87694	-0.48152	0.406928	-0.423891	0.27164	0.467659	0.00679553	0.310643	0.484287	1.17807	0.0232041	1.3377	0.957969	0.825547	0.865968	1.49171	0.983792	1.87929	-1.64595	-1.18241	-1.46236	-2.38392
43	-1.05123	-1.21712	-0.444762	-1.10495	0.157773	0.5406	-0.244218	0.627909	0.456491	0.990575	0.540769	1.02762	0.553742	0.763368	-0.721447	0.549955	-0.779353	-0.0728463	0.0782914	0.205361	0.160817	0.0883976	0.44019	0.0743545	-0.0908489	-0.358801	0.211206	0.128325	-0.406653	-1.10351	0.596481	0.139354	-0.673604	-0.184681	-0.0314851	0.277637	-0.54632	0.375061	0.375963	-0.605001	0.128333	0.500711	0.181203	-0.497628	-2.31547	1.28557	0.866114	1.82986	1.64749
44	-0.0645116	0.421697	0.514986	0.201947	0.177403	0.0607171	-0.117012	-0.0877053	0.670407	0.288676	0.694736	0.226495	-0.675635	0.011771	1.39985	0.62946	0.648952	0.428367	0.0970024	0.102586	-0.405147	-0.928914	-0.783334	-0.728166	-0.767344	-0.224882	-0.310228	-0.734987	-0.486703	-0.260479	0.66784	0.319682	0.637018	0.310105	-0.0146056	0.13709	0.514044	0.110633	-0.188238	0.391356	-0.615885	-0.825812	-0.656723	-0.175081	4.29837	-0.0577891	-0.80134	0.0999442	-0.36449
45	0.452309	-0.163579	-0.450129	-0.911864	0.0160377	-0.0147331	0.0402934	0.185939	-0.0802598	0.488843	-0.111345	0.344947	0.448217	0.544965	-0.414311	0.110798	-0.226101	-0.410959	-0.561147	0.709995	0.16393	0.168653	0.00891917	0.0257501	0.033188	-0.178678	0.133157	-0.0510591	0.0562345	-0.358011	0.192463	0.452901	-0.0129958	0.191776	0.290508	0.0655321	-0.151549	-0.0339937	0.136493	-0.13628	0.0401654	-0.0670655	0.0867522	0.64662	-3.4081	0.615462	-0.0734119	-0.114754	0.291719
46	-2.0195	-1.8445	-2.12978	-1.60771	-1.64875	-1.12076	-1.45361	-0.453577	-0.880022	-0.385093	-1.17508	-0.640013	-0.974424	-0.34632	-0.221981	1.09778	-0.0549685	-0.0396481	0.542169	0.837347	1.28803	0.302376	1.49592	0.746484	2.17851	1.28485	1.66128	1.67998	2.09597	1.78504	0.643915	1.19021	0.201127	0.462672	0.761421	0.251276	0.454735	0.443254	0.642958	0.409551	0.147339	0.187956	-0.324176	-0.388311	0.0604574	0.168514	0.255409	-0.397806	-0.310127
47	-0.860343	-1.5228	-1.76108	-1.42887	-1.53719	-0.875546	-0.411486	-1.02635	-1.86584	-1.42262	-1.17102	-0.87127	-0.633074	-0.485262	-1.11362	3.3676	0.524407	-0.823786	0.27639	1.10618	2.26039	0.372679	1.21745	0.390961	2.79801	0.623231	1.08486	0.778194	1.65677	1.35301	-0.205791	-0.168323	-0.614425	0.0273509	-0.178611	-0.295289	0.181544	-0.15501	0.263105	0.0356002	0.0243723	-0.00777332	-0.2237	0.202561	0.00123341	-0.115697	-0.00534586	-0.499039	-0.167308
48	-0.0222329	-0.110675	-0.373597	-1.01756	0.0115595	0.0968004	-0.0702626	-0.317938	1.03338	0.872085	0.0536881	0.658483	-0.200691	-0.72651	-0.968398	1.99361	1.06833	-0.160905	-0.0267883	0.782711	0.4715	-0.262986	0.193763	-0.387836	0.104027	-0.565606	0.270905	0.0103621	-0.0126358	-2.39658	1.99813	1.65526	1.83509	1.84781	1.25304	0.961374	1.32565	0.942047	0.218709	-0.614788	-0.0870453	-0.66718	-0.327883	-0.661261	-1.28762	0.854058	-0.0611258	1.28029	0.915144
49	0.529706	0.515186	0.677036	0.126859	0.995037	0.741175	0.625511	0.656154	1.58812	1.86336	1.13546	1.46189	1.16528	1.32001	1.05554	-5.19066	-0.0607789	0.27453	-0.28214	-0.419172	-1.1085	-0.284528	-0.634585	-0.300943	-1.98281	-0.459002	-0.699242	-0.581135	-2.06845	-0.658914	0.510369	0.147696	0.258936	0.261023	0.0887467	0.412494	-0.396098	0.008161	-0.432708	-0.0706966	-0.115089	-0.40806	-0.0648763	-0.0381929	-0.566795	0.251017	-0.0222901	0.324457	0.529745
50	-0.826987	-2.04369	0.0999769	-0.0186173	-0.335517	-0.203954	-0.386184	-0.734444	2.49651	1.88947	1.4747	0.935355	1.13783	0.433657	0.842588	-0.21265	-1.6241	-1.04901	0.521273	-1.00245	-1.23676	-0.170723	-0.0155916	0.00974139	0.183647	0.0491573	-0.507934	-0.0998775	-0.264086	0.65867	1.47422	0.00123804	0.0553664	-0.0363217	0.937031	0.784491	0.358559	0.723017	0.971787	0.0180518	0.989669	0.0852974	0.296514	-0.765565	-0.805166	0.154695	0.84202	0.739845	0.76443
51	1.85996	1.43714	0.755746	1.2609	-0.258767	-0.758693	0.103168	-1.12884	-1.44007	-1.97954	-0.714732	-1.48441	-1.1909	-1.65609	-2.39628	1.28657	1.66278	1.50337	1.19696	0.905062	0.868437	0.326745	-0.17201	-0.155521	0.0730582	0.505769	-0.331088	-0.229018	0.251858	-0.101564	0.0982486	0.482793	0.112836	-0.0292617	-0.389209	-0.79027	-0.438477	-0.678765	-1.32719	-0.492756	-1.15234	-1.49318	-1.43275	-0.40831	-0.63723	0.877867	0.593222	-0.226536	0.00996246
52	0.289793	0.145386	-0.0726663	-0.0419634	-2.21444	-1.42288	-1.03375	-0.839471	-1.41966	-0.329914	-0.546664	-0.231937	-1.52621	-1.8567	-1.44395	1.7453	2.64631	2.85858	2.13979	0.642708	0.885734	0.541116	-0.0557291	-0.188157	0.388381	0.0337781	-0.0803981	-0.367417	-0.277737	1.63278	0.111232	1.10432	0.296451	-0.0232449	0.144709	0.433162	0.648267	-0.107473	0.330372	-0.339799	0.671794	-0.411344	0.0776368	-0.643277	-0.634665	-0.152551	1.13726	1.41932	0.937512
53	-1.53094	-1.8526	-0.734317	0.627706	-0.939071	-0.223296	-0.566209	0.56561	0.257937	0.680369	-0.195087	-0.616862	0.379963	-0.107973	1.57583	0.398987	-0.559992	1.03625	-0.300075	-0.32271	-0.0669931	-0.0826224	1.70607	-1.53269	0.617626	0.165742	0.633328	-0.0446428	-0.159408	1.19008	-0.659809	-0.493702	1.28781	0.665385	1.72752	-1.24287	1.36605	-0.15595	1.08905	-0.995528	1.5086	1.17473	-1.7142	2.19325	-1.23716	-0.656495	-0.928335	-1.97688	-0.0233315
[truncated: 12 more columns]

## Sheet: B
Supplementary file 1B: environmental/developmental parameters for the two-season analysis
				Raw environmental parameters
tp	Temperature	in °C		sample	season	field	ps.10d	ps.15d	ps.24h	ps.6d	ps.3d	ps.4h	ps.1h	ps.15min	ra.10d	ra.15d	ra.1h	ra.24h	ra.3d	ra.4h	ra.6d	ra.15min	hu.10d	hu.15d	hu.1h	hu.24h	hu.3d	hu.4h	hu.6d	hu.15min	hu.d.120min	hu.d.20min	hu.d.60min	so.d.120min	so.d.20min	so.d.60min	tp.d.120min	tp.d.20min	tp.d.60min	wd.d.120min	wd.d.20min	wd.d.60min	sm.15	sm.30	so.10d	so.15d	so.1h	so.1h.NLm	so.1h.NLp
hu	Relative humidity	in %		irr.dry.1	1	1	1014.72	1012.96	1012.65	1014.56	1013.43	1013.29	1013.42	1013.2	4.28	74.81	0	0	1.8	0	4.28	0	83.4604	84.8528	80.2	83.5104	85.33	84.9	85.6701	81	-1.4	-9	-3.16667	120.5	720	367.667	0.7	1.2	1.03333	0.35	0.6	0.15	0	0	145.992	136.363	605.25	-0.358348	2.79058
so	Solar radiation	in W/m2		irr.dry.2	1	1	1014.21	1013.27	1012.19	1013.17	1012.17	1013.64	1013.8	1013.7	4.28	14.68	0	0	0	0	4.28	0	84.1823	84.1826	77.3	84.75	84.16	84	86.3142	79	-2.9	-5.4	-0.5	60	-1169.4	-311.8	0.6	-1.38	0.27	0.325	-0.3	0.466667	0	0	155.334	146.789	577	-0.412714	2.42298
wd	Wind speed	in m/s		irr.dry.3	1	1	1013.88	1014.08	1014.59	1012.92	1013.26	1015.88	1016.12	1015.9	4.78	5.28	0	0.5	0.5	0	0.5	0	85.3125	83.7632	80.8	86.6979	84.96	84	84.4983	81	-1	-1.2	-1.4	-53.25	217.2	-12.6	0.4	1.02	0.09	1.45	0.93	1.07333	0	0	154.926	146.166	201.75	-2.6946	0.371113
ps	Atmospheric pressure	in hPa		irr.dry.4	1	1	1013.89	1014.43	1016.47	1013.95	1015.6	1017.1	1017.12	1016.9	5.03	5.03	0	0	0.8	0	0.75	0	84.9177	83.7174	76.2	78.375	82.62	79	83.3767	77	-1.4	-3.6	-0.466667	41.5	-109.8	60.5333	0.4	0.24	0.24	0.9	0.96	0.206667	0	0	163.852	153.938	214	-2.53451	0.394554
ra	Precipitation	in mm		irr.dry.5	1	1	1013.99	1014.45	1014.96	1015	1015.54	1015.93	1016.1	1015.9	1.75	6.03	0	0.5	1	0	1.75	0	84.4896	84.7743	81.5	86.9792	85.04	86.8	84.6736	85	-2.4	5.4	0.233333	-29.75	56.4	-216.9	0.8	0.06	0.146667	1.35	-1.2	0.293333	0	0	173.249	157.754	350.75	-1.27922	0.781727
sm 15	Soil moisture 15 cm deep	in cbar		irr.dry.6	1	1	1014.43	1014.37	1015.17	1015.48	1015.15	1016.15	1016.17	1015.9	4.27	8.55	0	1.01	3	0	3.77	0	85.1177	85.4847	74.5	84.9688	87.05	82.8	85.3455	74	-5.8	1.8	-4.53333	187.25	-136.2	114.6	0.9	0.18	0.713333	1.025	-0.72	0.74	0	0	165.683	162.745	588.5	-0.389652	2.56639
sm 30	Soil moisture 30 cm deep	in cbar		irr.dry.7	1	1	1014.89	1014.2	1013.6	1014.84	1014.52	1014.11	1014.1	1013.9	4.27	6.04	0	0	1	0	3.52	0	85.051	85.0312	80.8	85.0625	84.42	85.7	86.5365	84	-1.4	-15.3	0.733333	19.75	70.8	-156	0.4	2.1	-0.316667	0.45	0.69	0.49	0	0	171.703	174.214	377.5	-1.11907	0.893597
dv stage	Developmental stage			irr.dry.8	1	1	1014.35	1013.84	1011.07	1013.52	1011.95	1013.08	1013.45	1013.3	3.77	4.27	0	0	0	0	2.52	0	84.8896	84.7674	78.3	83.1667	84.53	83.3	85.1649	78	-3.8	2.1	-1.96667	132.5	344.4	180.5	0.9	1.89	1.16333	0.35	0.36	0.146667	0	0	170.358	171.301	460	-0.740818	1.34986
				irr.dry.9	1	1	1013.67	1013.91	1013.13	1012.67	1012.15	1014.26	1014	1013.7	4.02	4.77	0	0.5	0.5	0	0.5	0	85.901	85.0035	75.9	87.1667	84.81	82.3	84.6823	75	-4.5	-3.9	-0.25	302.25	129.9	571	1.45	0.96	1.9	1.45	-0.66	1.65	0	0	167.936	165.415	759.75	-0.165506	6.04209
d	Change from 20 min, 1 h or 2 h ago			irr.dry.10	1	1	1013.16	1013.91	1012.61	1012.12	1012.75	1013.76	1014	1013.8	4.53	6.28	0	1.51	2	0	2.01	0	85.4167	85.2514	82.8	87.2083	86.36	89.3	85.283	85	-3.4	-2.1	-4.1	126.25	-63.6	213.5	0.95	0.27	1	0.9	-1.92	-0.2	0	0	171.626	168.638	480	-0.67032	1.49182
e	Fluctuation, residual of daily cyclic variation decomposition			irr.dry.11	1	1	1012.6	1013.54	1012.29	1012.57	1012.5	1013.49	1013.4	1013.2	4.79	8.31	0	2.53	4.3	0	4.79	0	85.5885	85.6785	80.5	88.0729	87.7	82.6	86.5104	81	0.6	11.1	5.4	-70.5	1075.8	-312.5	-0.1	0.21	-1.4	0.675	-0.24	0.05	0	0	169.35	169.865	212.25	-2.55678	0.391116
				irr.dry.12	1	1	1012.1	1012.99	1011.48	1012.23	1011.88	1013.16	1013.45	1013.3	5.79	8.81	0	0	3.5	0	5.29	0	86.2135	86.1056	71.6	84.3438	87.54	80.1	87.0573	72	-3.25	2.7	-3.6	110	-569.1	-250.5	0.6	-1.92	-0.15	1.25	-1.68	0.9	0	0	161.132	171.479	695.75	-0.227922	4.38746
NLm	Exponentional transformation increasing the effect of low values			irr.dry.13	1	1	1012.13	1012.47	1011.19	1011.8	1011.34	1012.24	1012.23	1012	6.04	7.05	0	0.25	0.3	0	4.03	0	86.0844	85.509	73.8	86.5521	83.86	83.3	86.2778	68	-5.9	-5.7	-7.2	134	-46.5	79.5	1.1	0.84	1	0.55	0.15	0.65	0	0	172.912	175.969	662.25	-0.269483	3.71081
NLp	Exponentional transformation increasing the effect of high values			irr.dry.14	1	1	1011.57	1011.8	1009.48	1010.95	1010.33	1010.32	1010.85	1010.7	5.54	6.04	0	0	0.3	0	1.25	0	85.6031	85.3924	79.2	80.7396	84.34	81.2	84.7066	78	-1.8	-3.9	-1.45	65.5	-70.2	45.5	0.45	0.69	0.5	0.1	-1.62	-0.4	0	0	173.261	167.951	257.5	-2.03908	0.490417
				irr.dry.15	1	1	1011.11	1011.51	1010.19	1010.47	1009.98	1012.92	1013.77	1013.7	77.16	79.17	4.83	72.63	73.1	20.07	73.38	1.27	86.2969	85.9542	99	95.2396	86.53	99.1	85.4219	98	0	-2.1	-0.366667	45.25	381.6	211.3	0.3	0.78	0.436667	0.325	0.45	0.53	0	0	148.214	153.192	95	-4.59514	0.217621
				rainf.dry.1	1	2	1014.72	1012.96	1012.65	1014.56	1013.43	1013.29	1013.42	1013.2	4.28	74.81	0	0	1.8	0	4.28	0	83.4604	84.8528	80.2	83.5104	85.3299	82.4	85.6701	81	-2.9	-9	-3.16667	120.5	720	367.667	0.8	1.2	1.03333	0.35	0.6	0.15	-17	-7	145.992	136.363	605.25	-0.358348	2.79058
				rainf.dry.2	1	2	1014.21	1013.27	1012.19	1013.17	1012.17	1013.64	1013.8	1013.7	4.28	14.68	0	0	0	0	4.28	0	84.1823	84.1826	77.3	84.75	84.1597	82	86.3142	79	-2.4	-5.4	-0.5	60	-1169.4	-311.8	0.6	-1.38	0.27	0.325	-0.3	0.466667	-21	-8	155.334	146.789	577	-0.412714	2.42298
				rainf.dry.3	1	2	1013.88	1014.08	1014.59	1012.92	1013.26	1015.88	1016.12	1015.9	4.78	5.28	0	0.5	0.5	0	0.5	0	85.3125	83.7632	80.8	86.6979	84.9618	82.6	84.4983	81	-0.5	-1.2	-1.4	-53.25	217.2	-12.6	0.3	1.02	0.09	1.45	0.93	1.07333	-15	-10	154.926	146.166	201.75	-2.6946	0.371113
				rainf.dry.4	1	2	1013.89	1014.43	1016.47	1013.95	1015.6	1017.1	1017.12	1016.9	5.03	5.03	0	0	0.8	0	0.75	0	84.9177	83.7174	76.2	78.375	82.6181	78.3	83.3767	77	-1.9	-3.6	-0.466667	41.5	-109.8	60.5333	0.4	0.24	0.24	0.9	0.96	0.206667	-15	-12	163.852	153.938	214	-2.53451	0.394554
				rainf.dry.5	1	2	1013.99	1014.45	1014.96	1015	1015.54	1015.93	1016.1	1015.9	1.75	6.03	0	0.5	1	0	1.75	0	84.4896	84.7743	81.5	86.9792	85.0417	84.6	84.6736	85	-1.9	5.4	0.233333	-29.75	56.4	-216.9	0.8	0.06	0.146667	1.35	-1.2	0.293333	-17	-15	173.249	157.754	350.75	-1.27922	0.781727
				rainf.dry.6	1	2	1014.43	1014.37	1015.17	1015.48	1015.15	1016.15	1016.17	1015.9	4.27	8.55	0	1.01	3	0	3.77	0	85.1177	85.4847	74.5	84.9688	87.0486	81.5	85.3455	74	-3.4	1.8	-4.53333	187.25	-136.2	114.6	0.9	0.18	0.713333	1.025	-0.72	0.74	-19	-18	165.683	162.745	588.5	-0.389652	2.56639
				rainf.dry.7	1	2	1014.89	1014.2	1013.6	1014.84	1014.52	1014.11	1014.1	1013.9	4.27	6.04	0	0	1	0	3.52	0	85.051	85.0312	80.8	85.0625	84.4236	83.7	86.5365	84	-1.4	-15.3	0.733333	19.75	70.8	-156	0.4	2.1	-0.316667	0.45	0.69	0.49	-23	-20	171.703	174.214	377.5	-1.11907	0.893597
				rainf.dry.8	1	2	1014.35	1013.84	1011.07	1013.52	1011.95	1013.08	1013.45	1013.3	3.77	4.27	0	0	0	0	2.52	0	84.8896	84.7674	78.3	83.1667	84.5278	80.8	85.1649	78	-3.4	2.1	-1.96667	132.5	344.4	180.5	1.1	1.89	1.16333	0.35	0.36	0.146667	-25	-25	170.358	171.301	460	-0.740818	1.34986
				rainf.dry.9	1	2	1013.67	1013.91	1013.13	1012.67	1012.15	1014.26	1014	1013.7	4.02	4.77	0	0.5	0.5	0	0.5	0	85.901	85.0035	75.9	87.1667	84.8125	80.5	84.6823	75	-4.15	-3.9	-0.25	302.25	129.9	571	1.3	0.96	1.9	1.45	-0.66	1.65	-20	-26	167.936	165.415	759.75	-0.165506	6.04209
				rainf.dry.10	1	2	1013.16	1013.91	1012.61	1012.12	1012.75	1013.76	1014	1013.8	4.53	6.28	0	1.51	2	0	2.01	0	85.4167	85.2514	82.8	87.2083	86.3576	87.1	85.283	85	-3.55	-2.1	-4.1	126.25	-63.6	213.5	1	0.27	1	0.9	-1.92	-0.2	-21	-30	171.626	168.638	480	-0.67032	1.49182
				rainf.dry.11	1	2	1012.6	1013.54	1012.29	1012.57	1012.5	1013.49	1013.4	1013.2	4.79	8.31	0	2.53	4.3	0	4.79	0	85.5885	85.6785	80.5	88.0729	87.6979	80.3	86.5104	81	1.15	11.1	5.4	-70.5	1075.8	-312.5	-0.15	0.21	-1.4	0.675	-0.24	0.05	-21	-30	169.35	169.865	212.25	-2.55678	0.391116
				rainf.dry.12	1	2	1012.1	1012.99	1011.48	1012.23	1011.88	1013.16	1013.45	1013.3	5.79	8.81	0	0	3.5	0	5.29	0	86.2135	86.1056	71.6	84.3438	87.5417	78.4	87.0573	72	-3.3	2.7	-3.6	110	-569.1	-250.5	0.45	-1.92	-0.15	1.25	-1.68	0.9	-23	-29	161.132	171.479	695.75	-0.227922	4.38746
				rainf.dry.13	1	2	1012.13	1012.47	1011.19	1011.8	1011.34	1012.24	1012.23	1012	6.04	7.05	0	0.25	0.3	0	4.03	0	86.0844	85.509	73.8	86.5521	83.8576	81.3	86.2778	68	-5.3	-5.7	-7.2	134	-46.5	79.5	1.15	0.84	1	0.55	0.15	0.65	-24	-31	172.912	175.969	662.25	-0.269483	3.71081
				rainf.dry.14	1	2	1011.57	1011.8	1009.48	1010.95	1010.33	1010.32	1010.85	1010.7	5.54	6.04	0	0	0.3	0	1.25	0	85.6031	85.3924	79.2	80.7396	84.3368	79.6	84.7066	78	-1.6	-3.9	-1.45	65.5	-70.2	45.5	0.45	0.69	0.5	0.1	-1.62	-0.4	-23	-31	173.261	167.951	257.5	-2.03908	0.490417
				rainf.dry.15	1	2	1011.11	1011.51	1010.19	1010.47	1009.98	1012.92	1013.77	1013.7	77.16	79.17	4.83	72.63	73.1	20.07	73.38	1.27	86.2969	85.9542	99	95.2396	86.5278	96.8	85.4219	98	-0.5	-2.1	-0.366667	45.25	381.6	211.3	0.3	0.78	0.436667	0.325	0.45	0.53	0	0	148.214	153.192	95	-4.59514	0.217621
				irr.wet.1	2	1	1006.33	1006.96	1005.61	1005.84	1006.3	1006.37	1006.09	1006.1	52.8	52.8	0	1.8	20	0.2	20.4	0	88.8906	88.9527	85.1667	88.7493	89.9789	90.3083	88.5381	85.8667	-3.37253	0.6	-0.516667	213.397	466.8	144.367	1.15169	1.185	0.755	0.402129	0.27	0.34	0	0	167.113	178.342	513	-0.56836	1.75945
				irr.wet.2	2	1	1006.69	1006.66	1009.3	1006.74	1007.3	1009.94	1009.53	1010	78.8	93.6	0	22.8	42.6	0.2	60.8	0	89.8031	89.1465	81.3	92.6528	90.9303	88.0417	89.5832	82.7333	-4.58465	3.9	1.18333	141.225	759.3	218.833	1.19417	0.9	0.79	0.34493	1.29	0.58	0	0	154.77	172.856	590	-0.386741	2.58571
				irr.wet.3	2	1	1006.85	1006.86	1008.09	1007.56	1008.9	1008.41	1008.12	1008.8	68.8	101.2	0	0	30.4	0	57.2	0	89.0283	88.8758	80.25	85.0993	89.2218	87.1583	89.7936	80.1333	-5.0368	1.05	-1.13333	319.489	257.7	353.833	1.72188	1.77	1.62667	0.169265	0.99	0.436667	0	0	162.597	169.477	785	-0.145876	6.85515
				irr.wet.4	2	1	1007.37	1007.16	1007.85	1008.24	1008	1007.73	1007.58	1008.3	80.6	113.4	0	8.6	12.2	0	60.6	0	88.8153	89.4387	84.55	88.766	86.9134	91.1792	89.1159	81.2	-4.46373	-11.7	-8.48333	170.413	-564	56.5	1.30531	1.14	1.57333	0.323209	-1.29	-0.16	0	0	171.454	167.225	728	-0.19398	5.15517
				irr.wet.5	2	1	1007.31	1006.9	1004.76	1007.51	1006.5	1004.44	1003.59	1004.9	148.8	162.2	0	66.8	88	0	99.2	0	90.0456	89.5776	86.9667	93.4153	91.6063	92.6792	89.451	84.9333	-4.01467	-5.4	-3.66667	260.843	410.7	342.167	1.10906	1.665	1.245	0.0806529	0.72	-0.883333	0	0	161.454	166.221	534	-0.511709	1.95424
				irr.wet.6	2	1	1006.77	1006.43	1003.53	1005.71	1003.8	1003.6	1004.14	1003.9	164.2	184.2	0	14.2	91	0	115.8	0	90.4052	89.6402	87.2333	93.3514	92.2398	91.6083	90.833	84.4	-3.55229	-6	-6.75	186.292	273.6	306.9	1.18991	0.51	1.79667	0.863332	2.25	1.84	0	0	155.143	158.077	501	-0.603506	1.65699
				irr.wet.7	2	1	1006.77	1007	1009.71	1006.11	1008.5	1009.42	1008.6	1010	132.2	189.4	0	4.6	16.4	0	107.4	0	89.3599	89.8174	88.8833	90.0312	87.8338	92.9375	90.0368	85.9333	-3.20411	-9.3	-4.51667	150.557	-536.1	168.167	1.09588	1.59	1.64333	0.348831	-0.93	0.68	0	0	172.076	162.524	471	-0.701173	1.42618
				irr.wet.8	2	1	1006.69	1007.06	1007.23	1006.52	1008.8	1007.63	1006.63	1007.1	135.2	185.4	0	3	7.6	0.2	43.6	0	89.7317	89.6747	84.6	88.8181	87.8984	88.9333	89.2706	83.7333	-2.80769	0.6	-3.7	192.599	398.4	192.033	1.21145	1.035	1.38167	0.485036	1.2	1.23667	0	0	165.842	163.741	592	-0.382893	2.6117
				irr.wet.9	2	1	1006.75	1007.34	1009.62	1008.21	1007.9	1010.27	1009.6	1009.9	143.8	186.4	0	2.2	23.8	0	40.2	0	90.2575	89.7254	86.2333	92.5187	89.9056	90.1125	88.8697	86.2667	-2.31815	-2.1	0.233333	109.777	1380	-5.03333	1.16903	0.57	0.341667	0.513938	-0.42	0.436667	0	0	149.184	161.834	556	-0.458406	2.18147
				irr.wet.10	2	1	1007.22	1007.2	1007.26	1008.33	1008.7	1007.24	1006.53	1007.3	70.4	162	0	6	8.2	0.2	34.4	0	89.4472	89.4177	89.7167	88.5146	90.1562	94.275	89.6163	90.3333	-3.34096	0.9	-0.183333	42.464	-66.3	-105.667	0.703254	-0.195	0.311667	0.140647	1.53	0.48	0	0	156.925	164.446	166	-3.22199	0.310367
				irr.wet.11	2	1	1007.8	1006.94	1006.14	1007.57	1006.5	1005.87	1005.12	1006.4	76	188.2	0	26	35.8	0	56.6	0	89.7239	90.3575	92.4833	94.1708	91.5285	95.025	90.8199	92.2667	-1.31441	-1.5	-1.28333	27.9352	242.7	132.667	0.543492	1.29	0.713333	-0.00995116	-0.3	-0.32	0	0	156.835	151.588	300	-1.64872	0.606531
				irr.wet.12	2	1	1006.9	1006.4	1004.08	1005.9	1004.3	1006.08	1005.53	1004.9	113	215.8	0	18.6	74.8	0.2	84.6	0	90.5558	90.3832	86.1333	90.0535	91.9868	87.4458	90.9684	85.2	-1.39885	-2.7	-2.28333	101.327	104.7	70.8667	0.894544	1.29	0.943333	0.0846662	-1.89	-0.366667	0	0	139.861	145.124	369	-1.16766	0.856415
				irr.wet.13	2	1	1006.72	1006.89	1008.4	1005.7	1006.4	1008.87	1008.02	1008.9	105.4	139	0	0	18.6	0	78.6	0	90.2402	89.8715	85.9167	88.1264	88.5822	91.2583	90.5922	83.8	-3.51602	3.15	-4.76667	156.253	-816	12	1.17822	-0.705	1.02	0.123767	1.02	-0.593333	0	0	135.165	147.341	539	-0.499074	2.00371
				irr.wet.14	2	1	1006.25	1007.04	1004.83	1005.62	1006.8	1004.83	1004.8	1005	84.6	113	0	0	0	0	48.8	0	89.1351	89.0655	76.3833	80.7542	86.0005	81.525	87.9074	74.6667	-3.68052	-0.3	-0.116667	-7.3866	920.1	179.8	0.615803	1.38	0.0633333	0.451562	-2.19	1.98333	0	0	157.753	161.768	480	-0.67032	1.49182
				irr.wet.15	2	1	1005.56	1006.39	1004.94	1006.1	1004.8	1005.59	1004.57	1005.1	215.2	245	8	127	138.2	34.8	136.6	1.6	89.4994	89.5136	98	93.6146	87.4634	98	87.8413	98	0	0	0	0.221987	4.8	0.933333	0.144811	-0.06	0.228333	0.0556378	1.29	-0.62	0	0	142.319	144.186	9	-7.06392	0.141564
				rainf.wet.1	2	2	1006.33	1006.96	1005.61	1005.84	1006.3	1006.37	1006.09	1006.1	52.8	52.8	0	1.8	20	0.2	20.4	0	88.8906	88.9527	85.1667	88.7493	89.9789	90.3083	88.5381	85.8667	-3.37253	0.6	-0.516667	213.397	466.8	144.367	1.15169	1.185	0.755	0.402129	0.27	0.34	-7	-5.5	167.113	178.342	513	-0.56836	1.75945
				rainf.wet.2	2	2	1006.69	1006.66	1009.3	1006.74	1007.3	1009.94	1009.53	1010	78.8	93.6	0	22.8	42.6	0.2	60.8	0	89.8031	89.1465	81.3	92.6528	90.9303	88.0417	89.5832	82.7333	-4.58465	3.9	1.18333	141.225	759.3	218.833	1.19417	0.9	0.79	0.34493	1.29	0.58	-3.75	-1.25	154.77	172.856	590	-0.386741	2.58571
				rainf.wet.3	2	2	1006.85	1006.86	1008.09	1007.56	1008.9	1008.41	1008.12	1008.8	68.8	101.2	0	0	30.4	0	57.2	0	89.0283	88.8758	80.25	85.0993	89.2218	87.1583	89.7936	80.1333	-5.0368	1.05	-1.13333	319.489	257.7	353.833	1.72188	1.77	1.62667	0.169265	0.99	0.436667	-7.25	-5	162.597	169.477	785	-0.145876	6.85515
				rainf.wet.4	2	2	1007.37	1007.16	1007.85	1008.24	1008	1007.73	1007.58	1008.3	80.6	113.4	0	8.6	12.2	0	60.6	0	88.8153	89.4387	84.55	88.766	86.9134	91.1792	89.1159	81.2	-4.46373	-11.7	-8.48333	170.413	-564	56.5	1.30531	1.14	1.57333	0.323209	-1.29	-0.16	-7	-5.75	171.454	167.225	728	-0.19398	5.15517
				rainf.wet.5	2	2	1007.31	1006.9	1004.76	1007.51	1006.5	1004.44	1003.59	1004.9	148.8	162.2	0	66.8	88	0	99.2	0	90.0456	89.5776	86.9667	93.4153	91.6063	92.6792	89.451	84.9333	-4.01467	-5.4	-3.66667	260.843	410.7	342.167	1.10906	1.665	1.245	0.0806529	0.72	-0.883333	-4.5	-2.25	161.454	166.221	534	-0.511709	1.95424
				rainf.wet.6	2	2	1006.77	1006.43	1003.53	1005.71	1003.8	1003.6	1004.14	1003.9	164.2	184.2	0	14.2	91	0	115.8	0	90.4052	89.6402	87.2333	93.3514	92.2398	91.6083	90.833	84.4	-3.55229	-6	-6.75	186.292	273.6	306.9	1.18991	0.51	1.79667	0.863332	2.25	1.84	-4.5	-2	155.143	158.077	501	-0.603506	1.65699
				rainf.wet.7	2	2	1006.77	1007	1009.71	1006.11	1008.5	1009.42	1008.6	1010	132.2	189.4	0	4.6	16.4	0	107.4	0	89.3599	89.8174	88.8833	90.0312	87.8338	92.9375	90.0368	85.9333	-3.20411	-9.3	-4.51667	150.557	-536.1	168.167	1.09588	1.59	1.64333	0.348831	-0.93	0.68	-6.5	-5.25	172.076	162.524	471	-0.701173	1.42618
				rainf.wet.8	2	2	1006.69	1007.06	1007.23	1006.52	1008.8	1007.63	1006.63	1007.1	135.2	185.4	0	3	7.6	0.2	43.6	0	89.7317	89.6747	84.6	88.8181	87.8984	88.9333	89.2706	83.7333	-2.80769	0.6	-3.7	192.599	398.4	192.033	1.21145	1.035	1.38167	0.485036	1.2	1.23667	-7.25	-6	165.842	163.741	592	-0.382893	2.6117
				rainf.wet.9	2	2	1006.75	1007.34	1009.62	1008.21	1007.9	1010.27	1009.6	1009.9	143.8	186.4	0	2.2	23.8	0	40.2	0	90.2575	89.7254	86.2333	92.5187	89.9056	90.1125	88.8697	86.2667	-2.31815	-2.1	0.233333	109.777	1380	-5.03333	1.16903	0.57	0.341667	0.513938	-0.42	0.436667	-5.75	-3.25	149.184	161.834	556	-0.458406	2.18147
				rainf.wet.10	2	2	1007.22	1007.2	1007.26	1008.33	1008.7	1007.24	1006.53	1007.3	70.4	162	0	6	8.2	0.2	34.4	0	89.4472	89.4177	89.7167	88.5146	90.1562	94.275	89.6163	90.3333	-3.34096	0.9	-0.183333	42.464	-66.3	-105.667	0.703254	-0.195	0.311667	0.140647	1.53	0.48	-4.75	-3.75	156.925	164.446	166	-3.22199	0.310367
				rainf.wet.11	2	2	1007.8	1006.94	1006.14	1007.57	1006.5	1005.87	1005.12	1006.4	76	188.2	0	26	35.8	0	56.6	0	89.7239	90.3575	92.4833	94.1708	91.5285	95.025	90.8199	92.2667	-1.31441	-1.5	-1.28333	27.9352	242.7	132.667	0.543492	1.29	0.713333	-0.00995116	-0.3	-0.32	-4.25	-2.25	156.835	151.588	300	-1.64872	0.606531
				rainf.wet.12	2	2	1006.9	1006.4	1004.08	1005.9	1004.3	1006.08	1005.53	1004.9	113	215.8	0	18.6	74.8	0.2	84.6	0	90.5558	90.3832	86.1333	90.0535	91.9868	87.4458	90.9684	85.2	-1.39885	-2.7	-2.28333	101.327	104.7	70.8667	0.894544	1.29	0.943333	0.0846662	-1.89	-0.366667	-4.5	-2.5	139.861	145.124	369	-1.16766	0.856415
				rainf.wet.13	2	2	1006.72	1006.89	1008.4	1005.7	1006.4	1008.87	1008.02	1008.9	105.4	139	0	0	18.6	0	78.6	0	90.2402	89.8715	85.9167	88.1264	88.5822	91.2583	90.5922	83.8	-3.51602	3.15	-4.76667	156.253	-816	12	1.17822	-0.705	1.02	0.123767	1.02	-0.593333	-7.25	-5.5	135.165	147.341	539	-0.499074	2.00371
				rainf.wet.14	2	2	1006.25	1007.04	1004.83	1005.62	1006.8	1004.83	1004.8	1005	84.6	113	0	0	0	0	48.8	0	89.1351	89.0655	76.3833	80.7542	86.0005	81.525	87.9074	74.6667	-3.68052	-0.3	-0.116667	-7.3866	920.1	179.8	0.615803	1.38	0.0633333	0.451562	-2.19	1.98333	-10.25	-8	157.753	161.768	480	-0.67032	1.49182
				rainf.wet.15	2	2	1005.56	1006.39	1004.94	1006.1	1004.8	1005.59	1004.57	1005.1	215.2	245	8	127	138.2	34.8	136.6	1.6	89.4994	89.5136	98	93.6146	87.4634	98	87.8413	98	0	0	0	0.221987	4.8	0.933333	0.144811	-0.06	0.228333	0.0556378	1.29	-0.62	-1.5	0	142.319	144.186	9	-7.06392	0.141564
				Merged, centered and scaled environmental parameters used for modeling in the two-season analysis
Merged parameters				sample	field	ps.10d	ps.15d	ps.24h	ps.6d	ps.3d	ra.10d	ra.15d	ra.24h	ra.3d	ra.6d	hu.10d	hu.15d	hu.1h	hu.24h	hu.3d	hu.4h	hu.6d	hu.15min	hu.d.120min	hu.d.20min	hu.d.60min	so.d.120min	so.d.20min	so.d.60min	tp.d.120min	tp.d.20min	tp.d.60min	wd.d.120min	wd.d.20min	wd.d.60min	sm.15	sm.30	so.10d	so.15d	so.1h	so.1h.NLm	so.1h.NLp	so.24h	so.3d	so.4h	so.4h.NLm	so.4h.NLp	so.6d	so.15min
15min.1h	Mean of 15 min and 1 h averages			irr.dry.1	-0.991632	1.4881	-0.716694	-0.042943	1.19323	0.360397	-0.151914	1.47443	-0.197143	-0.143959	-0.123869	-2.67309	-0.305332	0.127078	-0.558031	0.0277604	0.30436	0.244059	0.208903	0.675191	-1.34213	-0.596616	0.442138	1.24835	1.65054	0.120433	0.819177	0.897344	-1.16619	0.769432	-0.432472	1.22584	1.11358	-1.84904	-2.34036	0.851275	0.644037	0.526293	1.24368	0.451554	0.700483	0.591252	0.662318	-1.11459	1.19201
15min.to.4h	Mean of all averages between 15 min and 4 h			irr.dry.2	-0.991632	0.922681	-0.268606	-0.281575	0.0736318	-0.40393	-0.151914	-0.0418946	-0.197143	-0.203666	-0.123869	-1.58572	-1.45211	-0.394421	-0.214198	-0.664797	0.0920158	0.911474	-0.120944	-0.292439	-0.657758	0.363088	-0.208962	-2.30071	-1.76087	-0.147196	-2.09999	-0.260574	-1.23672	-0.0174871	0.0243646	1.22584	1.11358	-0.909007	-1.36778	0.70934	0.608255	0.31223	-0.0392066	0.965771	0.892857	0.674405	0.985181	0.0551012	-0.886392
				irr.dry.3	-0.991632	0.558802	0.933313	0.944005	-0.13408	0.256428	-0.136943	-0.278939	-0.178528	-0.187081	-0.26892	0.11674	-2.16989	0.234974	0.326112	-0.191254	0.0920158	-0.97024	0.208903	0.933226	0.140677	0.0391879	-1.42776	0.303889	-0.258667	-0.682454	0.615514	-0.53362	1.93738	1.05797	0.899567	1.22584	1.11358	-0.950092	-1.42589	-1.17601	-0.893609	-0.882634	-0.903506	-0.63114	-0.833702	-0.474768	-1.02472	0.569792	-1.1001
				irr.dry.4	-0.991632	0.562849	1.45535	1.90597	0.696626	1.67355	-0.129457	-0.285243	-0.197143	-0.177129	-0.259327	-0.477943	-2.24832	-0.592231	-1.98248	-1.57637	-1.08767	-2.13237	-0.450791	0.675191	-0.315572	0.375084	-0.408059	-0.31035	0.108514	-0.682454	-0.267024	-0.306081	0.385594	1.0842	-0.350722	1.22584	1.11358	-0.0519786	-0.700885	-1.11446	-0.788242	-0.868984	0.462741	-0.263962	-1.27075	-0.969549	-1.30576	-0.0649478	-0.949247
				irr.dry.5	-0.991632	0.67547	1.47579	1.13321	1.54357	1.63722	-0.227672	-0.260026	-0.178528	-0.170495	-0.220953	-1.12284	-0.439618	0.360853	0.404125	-0.143899	0.752642	-0.788545	0.868597	0.0301041	1.39536	0.627006	-1.17485	0.00184084	-1.2844	0.388062	-0.470687	-0.447661	1.65523	-0.804406	-0.225693	1.22584	1.11358	0.893509	-0.344928	-0.427396	0.0379493	-0.643522	0.977851	0.284362	-0.104483	0.137239	-0.387353	-0.33256	-0.664305
				irr.dry.6	-0.991632	1.16908	1.35757	1.24163	1.93198	1.3984	-0.152214	-0.196478	-0.159541	-0.104155	-0.143439	-0.176679	0.776086	-0.897938	-0.153521	1.04588	-0.19111	-0.0923467	-0.945562	-2.16319	0.710987	-1.08846	1.1605	-0.35994	0.379968	0.655691	-0.334912	0.411929	0.738272	-0.384716	0.418687	1.22584	1.11358	0.132277	0.120635	0.767119	0.623434	0.395739	1.19861	0.502952	0.952373	0.698491	1.09178	0.299032	1.17525
				irr.dry.7	-0.991632	1.67229	1.11386	0.440167	1.41662	1.01781	-0.152214	-0.259773	-0.197143	-0.170495	-0.153033	-0.2771	7.92243e-05	0.234974	-0.127517	-0.510895	0.49311	1.14174	0.703674	0.675191	-2.53978	0.806951	-0.642132	0.0288899	-0.978638	-0.682454	1.83749	-1.1505	-0.884045	0.848123	0.0580263	1.22584	1.11358	0.737971	1.19045	-0.292997	0.143353	-0.578376	0.408697	1.62905	0.429355	0.459	0.258763	1.08681	-0.0734703
				irr.dry.8	-0.991632	1.07727	0.580636	-0.853442	0.352307	-0.539195	-0.167186	-0.304408	-0.197143	-0.203666	-0.191406	-0.520308	-0.451502	-0.214594	-0.65338	-0.445783	-0.0731408	-0.279439	-0.285867	-0.873017	0.768018	-0.164749	0.571282	0.542822	0.710833	0.655691	1.59988	1.09454	-1.16619	0.559587	-0.437281	1.22584	1.11358	0.602662	0.918705	0.121503	0.392308	-0.312682	-1.10771	-0.527987	-0.147767	0.107025	-0.4323	0.189934	0.479652
				irr.dry.9	-0.991632	0.317373	0.684672	0.201004	-0.334372	-0.417163	-0.1597	-0.2918	-0.178528	-0.187081	-0.26892	1.00327	-0.0474557	-0.646179	0.456133	-0.280043	-0.309079	-0.77955	-0.780638	-1.32458	-0.372603	0.45306	2.39813	0.139904	2.67142	2.12765	0.547626	2.21201	1.93738	-0.332255	1.73149	1.22584	1.11358	0.35898	0.369643	1.62752	0.77096	2.41974	-0.574258	-0.658449	0.404707	0.446027	0.224819	0.231137	1.55656
				irr.dry.10	-0.991632	-0.241915	0.677176	-0.0679227	-0.773589	-0.0525373	-0.144429	-0.253721	-0.140926	-0.137325	-0.210976	0.273648	0.376793	0.594629	0.46769	0.637448	1.34249	-0.157109	0.868597	-0.614983	-0.0304166	-0.932512	0.50402	-0.223568	0.876517	0.789505	-0.233081	0.84678	0.385594	-1.43394	-0.937397	1.22584	1.11358	0.730215	0.670344	0.221988	0.438707	-0.230011	-0.640467	0.111446	-0.201873	0.0682879	-0.487081	-0.342689	-0.320699
				irr.dry.11	-0.991632	-0.862369	0.140866	-0.227896	-0.415973	-0.203345	-0.136643	-0.20253	-0.102952	-0.0610334	-0.104299	0.532547	1.10764	0.181026	0.707507	1.43063	-0.238297	1.11476	0.208903	1.96536	2.47895	2.48643	-1.6134	1.91669	-1.76438	-2.0206	-0.300968	-2.79383	-0.249226	0.0349742	-0.576736	1.22584	1.11358	0.501207	0.784743	-1.12325	-0.802902	-0.870985	-0.0814842	-0.686712	0.197304	0.330023	-0.0442216	0.166526	-0.0608993
				irr.dry.12	-0.991632	-1.42189	-0.679927	-0.640852	-0.688769	-0.579312	-0.106699	-0.189921	-0.197143	-0.0875696	-0.0851119	1.474	1.83849	-1.41944	-0.326882	1.33592	-0.828142	1.68143	-1.27541	-0.51822	0.88208	-0.752568	0.329137	-1.1731	-1.4531	-0.147196	-2.71098	-0.897681	1.37309	-1.2241	0.649509	1.22584	1.11358	-0.325636	0.935353	1.30597	0.729879	1.4562	0.683901	-0.0465642	1.31247	0.829352	1.81214	0.192672	1.31772
				irr.dry.13	-0.991632	-1.38732	-1.44177	-0.791791	-1.03421	-0.90361	-0.0992135	-0.234304	-0.187835	-0.193715	-0.133462	1.27943	0.817679	-1.02382	0.285661	-0.842376	-0.0731408	0.873695	-1.9351	-2.2277	-0.714789	-2.04817	0.587425	-0.191447	0.203741	1.19095	0.411851	0.84678	-0.601903	0.375972	0.288849	1.22584	1.11358	0.859655	1.35421	1.13766	0.702525	1.06217	0.140474	0.97865	1.2764	0.81732	1.73375	0.358988	0.492223
				irr.dry.14	-0.991632	-2.00696	-2.44383	-1.66022	-1.71991	-1.51839	-0.114185	-0.259773	-0.197143	-0.193715	-0.24014	0.554514	0.618033	-0.0527493	-1.3266	-0.55825	-0.56861	-0.754364	-0.285867	0.417156	-0.372603	0.0211935	-0.149771	-0.235965	0.0330363	-0.548639	0.242132	0.0883186	-1.87154	-1.17163	-1.22593	1.22584	1.11358	0.894767	0.606214	-0.895907	-0.462168	-0.81316	0.382174	0.0980892	-1.30081	-1.00789	-1.32284	0.745143	-0.903154
				irr.dry.15	-0.991632	-2.52347	-2.8684	-1.29935	-2.10706	-1.72633	2.03038	1.58438	2.50684	2.22108	2.52772	1.59952	1.57943	3.50783	2.69538	0.738076	3.65468	-0.0131924	3.0126	1.57831	-0.0304166	0.411073	-0.367701	0.612699	0.865471	-0.950083	0.343964	-0.00775316	-1.23672	0.638278	0.115732	1.22584	1.11358	-1.62549	-0.770457	-1.71235	-2.14449	-0.972017	-2.15149	-2.20706	-2.30657	-2.70622	-1.76448	-2.04035	-1.25514
				rainf.dry.1	0.991632	1.4881	-0.716694	-0.042943	1.19323	0.360397	-0.151914	1.47443	-0.197143	-0.143959	-0.123869	-2.67309	-0.305332	0.127078	-0.558031	0.0276782	-0.285485	0.244059	0.208903	-0.292439	-1.34213	-0.596616	0.442138	1.24835	1.65054	0.388062	0.819177	0.897344	-1.16619	0.769432	-0.432472	-0.975491	0.312718	-1.84904	-2.34036	0.851275	0.644037	0.526293	1.24368	0.451554	0.700483	0.591252	0.662318	-1.11459	1.19201
				rainf.dry.2	0.991632	0.922681	-0.268606	-0.281575	0.0736318	-0.40393	-0.151914	-0.0418946	-0.197143	-0.203666	-0.123869	-1.58572	-1.45211	-0.394421	-0.214198	-0.664962	-0.37986	0.911474	-0.120944	0.0301041	-0.657758	0.363088	-0.208962	-2.30071	-1.76087	-0.147196	-2.09999	-0.260574	-1.23672	-0.0174871	0.0243646	-1.49345	0.198309	-0.909007	-1.36778	0.70934	0.608255	0.31223	-0.0392066	0.965771	0.892857	0.674405	0.985181	0.0551012	-0.886392
				rainf.dry.3	0.991632	0.558802	0.933313	0.944005	-0.13408	0.256428	-0.136943	-0.278939	-0.178528	-0.187081	-0.26892	0.11674	-2.16989	0.234974	0.326112	-0.190185	-0.238297	-0.97024	0.208903	1.25577	0.140677	0.0391879	-1.42776	0.303889	-0.258667	-0.950083	0.615514	-0.53362	1.93738	1.05797	0.899567	-0.716511	-0.0305091	-0.950092	-1.42589	-1.17601	-0.893609	-0.882634	-0.903506	-0.63114	-0.833702	-0.474768	-1.02472	0.569792	-1.1001
				rainf.dry.4	0.991632	0.562849	1.45535	1.90597	0.696626	1.67355	-0.129457	-0.285243	-0.197143	-0.177129	-0.259327	-0.477943	-2.24832	-0.592231	-1.98248	-1.57752	-1.25283	-2.13237	-0.450791	0.352647	-0.315572	0.375084	-0.408059	-0.31035	0.108514	-0.682454	-0.267024	-0.306081	0.385594	1.0842	-0.350722	-0.716511	-0.259327	-0.0519786	-0.700885	-1.11446	-0.788242	-0.868984	0.462741	-0.263962	-1.27075	-0.969549	-1.30576	-0.0649478	-0.949247
				rainf.dry.5	0.991632	0.67547	1.47579	1.13321	1.54357	1.63722	-0.227672	-0.260026	-0.178528	-0.170495	-0.220953	-1.12284	-0.439618	0.360853	0.404125	-0.142913	0.233579	-0.788545	0.868597	0.352647	1.39536	0.627006	-1.17485	0.00184084	-1.2844	0.388062	-0.470687	-0.447661	1.65523	-0.804406	-0.225693	-0.975491	-0.602554	0.893509	-0.344928	-0.427396	0.0379493	-0.643522	0.977851	0.284362	-0.104483	0.137239	-0.387353	-0.33256	-0.664305
				rainf.dry.6	0.991632	1.16908	1.35757	1.24163	1.93198	1.3984	-0.152214	-0.196478	-0.159541	-0.104155	-0.143439	-0.176679	0.776086	-0.897938	-0.153521	1.04506	-0.497829	-0.0923467	-0.945562	-0.614983	0.710987	-1.08846	1.1605	-0.35994	0.379968	0.655691	-0.334912	0.411929	0.738272	-0.384716	0.418687	-1.23447	-0.945782	0.132277	0.120635	0.767119	0.623434	0.395739	1.19861	0.502952	0.952373	0.698491	1.09178	0.299032	1.17525
				rainf.dry.7	0.991632	1.67229	1.11386	0.440167	1.41662	1.01781	-0.152214	-0.259773	-0.197143	-0.170495	-0.153033	-0.2771	7.92243e-05	0.234974	-0.127517	-0.508758	0.0212344	1.14174	0.703674	0.675191	-2.53978	0.806951	-0.642132	0.0288899	-0.978638	-0.682454	1.83749	-1.1505	-0.884045	0.848123	0.0580263	-1.75243	-1.1746	0.737971	1.19045	-0.292997	0.143353	-0.578376	0.408697	1.62905	0.429355	0.459	0.258763	1.08681	-0.0734703
				rainf.dry.8	0.991632	1.07727	0.580636	-0.853442	0.352307	-0.539195	-0.167186	-0.304408	-0.197143	-0.203666	-0.191406	-0.520308	-0.451502	-0.214594	-0.65338	-0.447099	-0.662986	-0.279439	-0.285867	-0.614983	0.768018	-0.164749	0.571282	0.542822	0.710833	1.19095	1.59988	1.09454	-1.16619	0.559587	-0.437281	-2.01141	-1.74665	0.602662	0.918705	0.121503	0.392308	-0.312682	-1.10771	-0.527987	-0.147767	0.107025	-0.4323	0.189934	0.479652
				rainf.dry.9	0.991632	0.317373	0.684672	0.201004	-0.334372	-0.417163	-0.1597	-0.2918	-0.178528	-0.187081	-0.26892	1.00327	-0.0474557	-0.646179	0.456133	-0.278563	-0.733767	-0.77955	-0.780638	-1.0988	-0.372603	0.45306	2.39813	0.139904	2.67142	1.72621	0.547626	2.21201	1.93738	-0.332255	1.73149	-1.36396	-1.86105	0.35898	0.369643	1.62752	0.77096	2.41974	-0.574258	-0.658449	0.404707	0.446027	0.224819	0.231137	1.55656
				rainf.dry.10	0.991632	-0.241915	0.677176	-0.0679227	-0.773589	-0.0525373	-0.144429	-0.253721	-0.140926	-0.137325	-0.210976	0.273648	0.376793	0.594629	0.46769	0.63605	0.823423	-0.157109	0.868597	-0.711746	-0.0304166	-0.932512	0.50402	-0.223568	0.876517	0.92332	-0.233081	0.84678	0.385594	-1.43394	-0.937397	-1.49345	-2.31869	0.730215	0.670344	0.221988	0.438707	-0.230011	-0.640467	0.111446	-0.201873	0.0682879	-0.487081	-0.342689	-0.320699
				rainf.dry.11	0.991632	-0.862369	0.140866	-0.227896	-0.415973	-0.203345	-0.136643	-0.20253	-0.102952	-0.0610334	-0.104299	0.532547	1.10764	0.181026	0.707507	1.4294	-0.780955	1.11476	0.208903	2.32016	2.47895	2.48643	-1.6134	1.91669	-1.76438	-2.15441	-0.300968	-2.79383	-0.249226	0.0349742	-0.576736	-1.49345	-2.31869	0.501207	0.784743	-1.12325	-0.802902	-0.870985	-0.0814842	-0.686712	0.197304	0.330023	-0.0442216	0.166526	-0.0608993
				rainf.dry.12	0.991632	-1.42189	-0.679927	-0.640852	-0.688769	-0.579312	-0.106699	-0.189921	-0.197143	-0.0875696	-0.0851119	1.474	1.83849	-1.41944	-0.326882	1.33691	-1.22924	1.68143	-1.27541	-0.550474	0.88208	-0.752568	0.329137	-1.1731	-1.4531	-0.548639	-2.71098	-0.897681	1.37309	-1.2241	0.649509	-1.75243	-2.20428	-0.325636	0.935353	1.30597	0.729879	1.4562	0.683901	-0.0465642	1.31247	0.829352	1.81214	0.192672	1.31772
				rainf.dry.13	0.991632	-1.38732	-1.44177	-0.791791	-1.03421	-0.90361	-0.0992135	-0.234304	-0.187835	-0.193715	-0.133462	1.27943	0.817679	-1.02382	0.285661	-0.843774	-0.545017	0.873695	-1.9351	-1.84065	-0.714789	-2.04817	0.587425	-0.191447	0.203741	1.32476	0.411851	0.84678	-0.601903	0.375972	0.288849	-1.88192	-2.4331	0.859655	1.35421	1.13766	0.702525	1.06217	0.140474	0.97865	1.2764	0.81732	1.73375	0.358988	0.492223
				rainf.dry.14	0.991632	-2.00696	-2.44383	-1.66022	-1.71991	-1.51839	-0.114185	-0.259773	-0.197143	-0.193715	-0.24014	0.554514	0.618033	-0.0527493	-1.3266	-0.560141	-0.946111	-0.754364	-0.285867	0.546173	-0.372603	0.0211935	-0.149771	-0.235965	0.0330363	-0.548639	0.242132	0.0883186	-1.87154	-1.17163	-1.22593	-1.75243	-2.4331	0.894767	0.606214	-0.895907	-0.462168	-0.81316	0.382174	0.0980892	-1.30081	-1.00789	-1.32284	0.745143	-0.903154
				rainf.dry.15	0.991632	-2.52347	-2.8684	-1.29935	-2.10706	-1.72633	2.03038	1.58438	2.50684	2.22108	2.52772	1.59952	1.57943	3.50783	2.69538	0.73676	3.11202	-0.0131924	3.0126	1.25577	-0.0304166	0.411073	-0.367701	0.612699	0.865471	-0.950083	0.343964	-0.00775316	-1.23672	0.638278	0.115732	1.22584	1.11358	-1.62549	-0.770457	-1.71235	-2.14449	-0.972017	-2.15149	-2.20706	-2.30657	-2.70622	-1.76448	-2.04035	-1.25514
				irr.wet.1	-0.991632	-0.517376	0.121509	-0.583186	-0.754279	-0.362945	-1.75231	-2.58832	-0.681548	-0.680213	-1.89001	-1.16292	-1.04581	-0.195612	-0.321694	0.293526	-0.0922124	-1.04769	0.0938232	-0.171274	0.479061	0.677391	0.814714	0.471555	0.0325119	0.365208	0.332649	-0.31434	0.311163	0.029728	0.00288528	0.371204	0.222144	1.06123	1.61925	0.188242	0.425568	-0.202058	-0.0604187	-0.342074	-0.21143	0.0632444	-0.431389	0.536575	0.364279
				irr.wet.2	-0.991632	-0.115895	-0.32317	1.29685	-0.0321604	0.241963	-0.97377	-1.55945	0.100271	0.0694365	-0.339731	0.211596	-0.714254	-0.890944	0.761043	0.856681	-0.627005	0.0352836	-0.422937	-0.953192	1.1064	1.2892	0.0380085	1.02099	0.406388	0.478875	0.0101831	-0.261248	0.149779	0.921569	0.349119	0.371204	0.222144	-0.180682	1.10748	0.575109	0.545104	0.279098	-1.0084	-0.960279	0.676818	0.621971	0.610474	-0.737322	1.00121
				irr.wet.3	-0.991632	0.0548545	-0.0360432	0.678712	0.630827	1.20982	-1.27321	-1.36779	-0.748561	-0.335241	-0.477875	-0.955488	-1.17748	-1.07976	-1.33412	-0.154669	-0.835417	0.253318	-0.851739	-1.24487	0.564607	0.455459	1.95648	0.0787804	1.08418	1.89119	0.994553	1.00791	-0.345845	0.659263	0.142341	0.371204	0.222144	0.606808	0.792302	1.55484	0.703634	2.76532	1.43981	0.365428	0.910312	0.730798	0.974044	0.0642184	1.34481
				irr.wet.4	-0.991632	0.635395	0.409355	0.559662	1.1801	0.665399	-0.919871	-1.06014	-0.428387	-0.938941	-0.347406	-1.27631	-0.214266	-0.306506	-0.317071	-1.52104	0.11325	-0.448997	-0.67582	-0.87519	-1.85921	-2.18972	0.352123	-1.46471	-0.408642	0.776343	0.281733	0.927008	0.0884952	-1.33426	-0.718436	0.371204	0.222144	1.49796	0.582199	1.26846	0.671973	1.77537	1.28479	2.02428	1.3177	0.891742	1.7243	1.65536	0.372659
				irr.wet.5	-0.991632	0.569387	0.0231071	-1.0168	0.589574	-0.241963	1.12229	0.17047	1.73837	1.57537	1.1338	0.576879	0.0234875	0.128077	0.972544	1.25678	0.467157	-0.101677	-0.0601055	-0.58551	-0.66156	-0.456259	1.32533	0.366177	1.02561	0.251109	0.87575	0.428952	-0.595857	0.423187	-1.76195	0.371204	0.222144	0.491825	0.488551	0.293751	0.462854	-0.0886265	-0.114775	-0.160047	-0.0663477	0.172998	-0.292312	1.68775	0.992827
				irr.wet.6	-0.991632	-0.0317581	-0.673473	-1.64784	-0.859123	-1.87522	1.58342	0.725254	-0.219902	1.67488	1.7708	1.11863	0.130679	0.176031	0.954823	1.63181	0.214507	1.3303	-0.148065	-0.287236	-0.775622	-1.56592	0.52301	0.108647	0.848546	0.467477	-0.431086	1.26579	1.61241	1.76095	2.16685	0.371204	0.222144	-0.14323	-0.271131	0.127951	0.402437	-0.261725	-0.982099	-0.977452	-0.0640633	0.174661	-0.290037	-0.443008	0.448085
				irr.wet.7	-0.991632	-0.0276111	0.175667	1.50788	-0.538366	0.967853	0.625225	0.856385	-0.577305	-0.799626	1.44846	-0.455997	0.433872	0.472746	0.0338889	-0.976245	0.528108	0.505292	0.104818	-0.0626296	-1.40296	-0.762165	0.138433	-1.4123	0.152005	0.215827	0.79089	1.03319	0.160786	-1.0195	0.493384	0.371204	0.222144	1.56056	0.143688	-0.0227766	0.338155	-0.396129	0.783888	1.1897	-0.16009	0.103032	-0.383369	0.435636	-0.653969
				irr.wet.8	-0.991632	-0.12261	0.266578	0.242052	-0.206839	1.14933	0.715056	0.755515	-0.636873	-1.09152	-0.999752	0.104166	0.189701	-0.297514	-0.302625	-0.938016	-0.416627	-0.288649	-0.258014	0.193098	0.479061	-0.468255	0.590889	0.343072	0.271833	0.525128	0.16293	0.636265	0.545076	0.842877	1.29645	0.371204	0.222144	0.933283	0.257228	0.585157	0.547637	0.294231	0.196546	1.24122	0.100457	0.289367	-0.118896	0.640782	0.154763
				irr.wet.9	-0.991632	-0.0548676	0.675832	1.45934	1.15213	0.604908	0.972572	0.780732	-0.666656	-0.554165	-1.13022	0.896135	0.276452	-0.00379635	0.723867	0.25009	-0.138417	-0.704089	0.159793	0.508891	-0.0342186	0.947307	-0.30044	2.18692	-0.717583	0.411607	-0.363198	-0.941335	0.626623	-0.573576	0.142341	0.371204	0.222144	-0.742776	0.0793418	0.404285	0.497936	0.0436989	-0.734261	-0.596225	0.964578	0.754253	1.06505	0.872329	0.12124
				irr.wet.10	-0.991632	0.463797	0.471969	0.25704	1.25301	1.08884	-1.2253	0.165427	-0.525184	-1.07162	-1.35279	-0.324403	-0.250155	0.622602	-0.386801	0.398484	0.843675	0.0695838	0.830482	-0.15091	0.536092	0.797354	-1.02486	-0.529823	-1.22283	-0.834947	-1.22876	-0.986842	-0.426589	1.13141	0.204855	0.371204	0.222144	0.0361132	0.323017	-1.55517	-1.32097	-1.0459	0.212929	-0.43137	-1.61704	-1.56314	-1.35181	0.0109424	-1.76021
				irr.wet.11	-0.991632	1.11229	0.0879794	-0.315783	0.635726	-0.241963	-1.05761	0.826124	0.219406	-0.156122	-0.500899	0.0923458	1.35803	1.12012	1.18212	1.21074	1.02063	1.31674	1.14933	1.15639	0.0798435	0.401476	-1.18122	0.0506043	-0.0262305	-1.26252	0.451452	-0.377545	-0.85149	-0.468654	-0.949258	0.371204	0.222144	0.0270926	-0.876378	-0.881923	-0.285491	-0.873435	-0.522748	-0.798859	-0.332025	-0.0344992	-0.539271	-1.62653	-0.758727
				irr.wet.12	-0.991632	0.110617	-0.719689	-1.36481	-0.702995	-1.57276	0.0503054	1.52213	-0.0560924	1.13752	0.573553	1.34552	1.40208	-0.0217791	0.0400529	1.48204	-0.767585	1.47061	-0.0161259	1.10192	-0.148281	0.0415872	-0.391379	-0.208616	-0.336511	-0.322998	0.451452	-0.028653	-0.584534	-1.85888	-1.01658	0.371204	0.222144	-1.6808	-1.47936	-0.53525	0.0311296	-0.72792	-0.887775	-1.50293	-0.449373	-0.135678	-0.637952	-2.19486	-0.540831
				irr.wet.13	-0.991632	-0.0846538	0.013864	0.838651	-0.870741	-0.302454	-0.177267	-0.414575	-0.748561	-0.726651	0.343313	0.870088	0.526486	-0.0607417	-0.494478	-0.533257	0.131929	1.08084	-0.247019	-0.263839	0.963825	-0.852137	0.19973	-1.93807	-0.632064	0.436192	-1.80581	0.0876444	-0.474214	0.685494	-1.34358	0.371204	0.222144	-2.15335	-1.27256	0.318872	0.47117	-0.0598177	0.396343	-0.541273	0.49783	0.52913	0.360171	-2.21876	-0.318744
				irr.wet.14	-0.991632	-0.612869	0.236385	-0.98374	-0.929508	-0.0604908	-0.800096	-1.07023	-0.748561	-1.34362	-0.800211	-0.7945	-0.852818	-1.7751	-2.53937	-2.06145	-2.16453	-1.70119	-1.75332	-0.369951	0.307968	0.821346	-1.56135	1.32304	0.210413	-1.06899	0.553284	-1.36354	0.450634	-2.12118	2.37363	0.371204	0.222144	0.119409	0.0732094	0.0224416	0.358461	-0.357903	2.11318	2.12731	0.908228	0.729884	0.9706	0.967127	1.50405
				irr.wet.15	-0.991632	-1.3787	-0.72987	-0.928042	-0.547361	-1.27031	3.11055	2.25848	3.97958	3.24052	2.56896	-0.245739	-0.0860012	2.11217	1.02783	-1.19548	1.72254	-1.76967	2.0949	2.0043	0.364999	0.863333	-1.47947	-0.396269	-0.687626	-2.3295	-1.07602	-1.11325	-0.666436	0.921569	-1.38205	0.371204	0.222144	-1.43345	-1.56684	-2.34398	-3.8496	-1.1442	-2.11701	-0.637439	-2.47555	-3.32776	-1.65961	0.349753	-2.27143
				rainf.wet.1	0.991632	-0.517376	0.121509	-0.583186	-0.754279	-0.362945	-1.75231	-2.58832	-0.681548	-0.680213	-1.89001	-1.16292	-1.04581	-0.195612	-0.321694	0.293526	-0.0922124	-1.04769	0.0938232	-0.171274	0.479061	0.677391	0.814714	0.471555	0.0325119	0.365208	0.332649	-0.31434	0.311163	0.029728	0.00288528	-0.535225	-0.407106	1.06123	1.61925	0.188242	0.425568	-0.202058	-0.0604187	-0.342074	-0.21143	0.0632444	-0.431389	0.536575	0.364279
				rainf.wet.2	0.991632	-0.115895	-0.32317	1.29685	-0.0321604	0.241963	-0.97377	-1.55945	0.100271	0.0694365	-0.339731	0.211596	-0.714254	-0.890944	0.761043	0.856681	-0.627005	0.0352836	-0.422937	-0.953192	1.1064	1.2892	0.0380085	1.02099	0.406388	0.478875	0.0101831	-0.261248	0.149779	0.921569	0.349119	-0.114383	0.0791329	-0.180682	1.10748	0.575109	0.545104	0.279098	-1.0084	-0.960279	0.676818	0.621971	0.610474	-0.737322	1.00121
				rainf.wet.3	0.991632	0.0548545	-0.0360432	0.678712	0.630827	1.20982	-1.27321	-1.36779	-0.748561	-0.335241	-0.477875	-0.955488	-1.17748	-1.07976	-1.33412	-0.154669	-0.835417	0.253318	-0.851739	-1.24487	0.564607	0.455459	1.95648	0.0787804	1.08418	1.89119	0.994553	1.00791	-0.345845	0.659263	0.142341	-0.567597	-0.349901	0.606808	0.792302	1.55484	0.703634	2.76532	1.43981	0.365428	0.910312	0.730798	0.974044	0.0642184	1.34481
				rainf.wet.4	0.991632	0.635395	0.409355	0.559662	1.1801	0.665399	-0.919871	-1.06014	-0.428387	-0.938941	-0.347406	-1.27631	-0.214266	-0.306506	-0.317071	-1.52104	0.11325	-0.448997	-0.67582	-0.87519	-1.85921	-2.18972	0.352123	-1.46471	-0.408642	0.776343	0.281733	0.927008	0.0884952	-1.33426	-0.718436	-0.535225	-0.435708	1.49796	0.582199	1.26846	0.671973	1.77537	1.28479	2.02428	1.3177	0.891742	1.7243	1.65536	0.372659
				rainf.wet.5	0.991632	0.569387	0.0231071	-1.0168	0.589574	-0.241963	1.12229	0.17047	1.73837	1.57537	1.1338	0.576879	0.0234875	0.128077	0.972544	1.25678	0.467157	-0.101677	-0.0601055	-0.58551	-0.66156	-0.456259	1.32533	0.366177	1.02561	0.251109	0.87575	0.428952	-0.595857	0.423187	-1.76195	-0.2115	-0.0352761	0.491825	0.488551	0.293751	0.462854	-0.0886265	-0.114775	-0.160047	-0.0663477	0.172998	-0.292312	1.68775	0.992827
				rainf.wet.6	0.991632	-0.0317581	-0.673473	-1.64784	-0.859123	-1.87522	1.58342	0.725254	-0.219902	1.67488	1.7708	1.11863	0.130679	0.176031	0.954823	1.63181	0.214507	1.3303	-0.148065	-0.287236	-0.775622	-1.56592	0.52301	0.108647	0.848546	0.467477	-0.431086	1.26579	1.61241	1.76095	2.16685	-0.2115	-0.00667386	-0.14323	-0.271131	0.127951	0.402437	-0.261725	-0.982099	-0.977452	-0.0640633	0.174661	-0.290037	-0.443008	0.448085
				rainf.wet.7	0.991632	-0.0276111	0.175667	1.50788	-0.538366	0.967853	0.625225	0.856385	-0.577305	-0.799626	1.44846	-0.455997	0.433872	0.472746	0.0338889	-0.976245	0.528108	0.505292	0.104818	-0.0626296	-1.40296	-0.762165	0.138433	-1.4123	0.152005	0.215827	0.79089	1.03319	0.160786	-1.0195	0.493384	-0.47048	-0.378503	1.56056	0.143688	-0.0227766	0.338155	-0.396129	0.783888	1.1897	-0.16009	0.103032	-0.383369	0.435636	-0.653969
				rainf.wet.8	0.991632	-0.12261	0.266578	0.242052	-0.206839	1.14933	0.715056	0.755515	-0.636873	-1.09152	-0.999752	0.104166	0.189701	-0.297514	-0.302625	-0.938016	-0.416627	-0.288649	-0.258014	0.193098	0.479061	-0.468255	0.590889	0.343072	0.271833	0.525128	0.16293	0.636265	0.545076	0.842877	1.29645	-0.567597	-0.46431	0.933283	0.257228	0.585157	0.547637	0.294231	0.196546	1.24122	0.100457	0.289367	-0.118896	0.640782	0.154763
				rainf.wet.9	0.991632	-0.0548676	0.675832	1.45934	1.15213	0.604908	0.972572	0.780732	-0.666656	-0.554165	-1.13022	0.896135	0.276452	-0.00379635	0.723867	0.25009	-0.138417	-0.704089	0.159793	0.508891	-0.0342186	0.947307	-0.30044	2.18692	-0.717583	0.411607	-0.363198	-0.941335	0.626623	-0.573576	0.142341	-0.373363	-0.149685	-0.742776	0.0793418	0.404285	0.497936	0.0436989	-0.734261	-0.596225	0.964578	0.754253	1.06505	0.872329	0.12124
				rainf.wet.10	0.991632	0.463797	0.471969	0.25704	1.25301	1.08884	-1.2253	0.165427	-0.525184	-1.07162	-1.35279	-0.324403	-0.250155	0.622602	-0.386801	0.398484	0.843675	0.0695838	0.830482	-0.15091	0.536092	0.797354	-1.02486	-0.529823	-1.22283	-0.834947	-1.22876	-0.986842	-0.426589	1.13141	0.204855	-0.243873	-0.20689	0.0361132	0.323017	-1.55517	-1.32097	-1.0459	0.212929	-0.43137	-1.61704	-1.56314	-1.35181	0.0109424	-1.76021
				rainf.wet.11	0.991632	1.11229	0.0879794	-0.315783	0.635726	-0.241963	-1.05761	0.826124	0.219406	-0.156122	-0.500899	0.0923458	1.35803	1.12012	1.18212	1.21074	1.02063	1.31674	1.14933	1.15639	0.0798435	0.401476	-1.18122	0.0506043	-0.0262305	-1.26252	0.451452	-0.377545	-0.85149	-0.468654	-0.949258	-0.179128	-0.0352761	0.0270926	-0.876378	-0.881923	-0.285491	-0.873435	-0.522748	-0.798859	-0.332025	-0.0344992	-0.539271	-1.62653	-0.758727
				rainf.wet.12	0.991632	0.110617	-0.719689	-1.36481	-0.702995	-1.57276	0.0503054	1.52213	-0.0560924	1.13752	0.573553	1.34552	1.40208	-0.0217791	0.0400529	1.48204	-0.767585	1.47061	-0.0161259	1.10192	-0.148281	0.0415872	-0.391379	-0.208616	-0.336511	-0.322998	0.451452	-0.028653	-0.584534	-1.85888	-1.01658	-0.2115	-0.0638784	-1.6808	-1.47936	-0.53525	0.0311296	-0.72792	-0.887775	-1.50293	-0.449373	-0.135678	-0.637952	-2.19486	-0.540831
				rainf.wet.13	0.991632	-0.0846538	0.013864	0.838651	-0.870741	-0.302454	-0.177267	-0.414575	-0.748561	-0.726651	0.343313	0.870088	0.526486	-0.0607417	-0.494478	-0.533257	0.131929	1.08084	-0.247019	-0.263839	0.963825	-0.852137	0.19973	-1.93807	-0.632064	0.436192	-1.80581	0.0876444	-0.474214	0.685494	-1.34358	-0.567597	-0.407106	-2.15335	-1.27256	0.318872	0.47117	-0.0598177	0.396343	-0.541273	0.49783	0.52913	0.360171	-2.21876	-0.318744
				rainf.wet.14	0.991632	-0.612869	0.236385	-0.98374	-0.929508	-0.0604908	-0.800096	-1.07023	-0.748561	-1.34362	-0.800211	-0.7945	-0.852818	-1.7751	-2.53937	-2.06145	-2.16453	-1.70119	-1.75332	-0.369951	0.307968	0.821346	-1.56135	1.32304	0.210413	-1.06899	0.553284	-1.36354	0.450634	-2.12118	2.37363	-0.956067	-0.693128	0.119409	0.0732094	0.0224416	0.358461	-0.357903	2.11318	2.12731	0.908228	0.729884	0.9706	0.967127	1.50405
				rainf.wet.15	0.991632	-1.3787	-0.72987	-0.928042	-0.547361	-1.27031	3.11055	2.25848	3.97958	3.24052	2.56896	-0.245739	-0.0860012	2.11217	1.02783	-1.19548	1.72254	-1.76967	2.0949	2.0043	0.364999	0.863333	-1.47947	-0.396269	-0.687626	-2.3295	-1.07602	-1.11325	-0.666436	0.921569	-1.38205	0.17697	0.222144	-1.43345	-1.56684	-2.34398	-3.8496	-1.1442	-2.11701	-0.637439	-2.47555	-3.32776	-1.65961	0.349753	-2.27143
[truncated: 29 more columns]

## Sheet: C
Supplementary file 1C: characteristics and environmental/developmental models of the 53 clusters in the two-season analysis of our data
In bold: 27 clusters with high genotype correlation
Cluster	Number of genes	Median dissimilarity to medoid	Genotype correlation	Field correlation in dry season	Field correlation in wet season	Field difference in dry season	Field difference in wet season	Cluster group	Model type	Model error (MSE)	% variance explained	BIC	Model irrigated field dry season	Model rainfed field dry season	Model irrigated field wet season	Model rainfed field wet season
1	713	0.158311	0.955274	0.646878	0.924249	1.48628	0.641699	2	3	0.069063	94.6369	-136	-0.61 * dv stage + 0.22 * tp 10d + 0.27 * so 1h NL-	-0.6 * dv stage -0.17 * hu 10d -0.24 * tp 10d	-0.61 * dv stage + 0.22 * tp 10d + 0.27 * so 1h NL-	-0.6 * dv stage -0.17 * hu 10d -0.24 * tp 10d
2	645	0.251079	0.959014	0.104837	0.857375	-1.76124	-0.972823	2	8	0.062712	96.074	-129	-0.31 * wd ∂2h	0.17 * so 10d + 0.65 * dv stage	-0.17 * so 10d + 0.41 * dv stage -0.34 * so ∂2h	-0.28 * so 10d -0.44 * wd 15d -0.28 * so ∂2h
3	610	0.241932	0.943369	0.619372	0.661072	-2.12005	-0.712832	4	1	0.0877385	92.6954	-138	0.54 * dv stage - 0.54 * sm 30	0.54 * dv stage - 0.54 * sm 30	0.54 * dv stage -0.54 * sm 30	0.54 * dv stage - 0.54 * sm 30
4	607	0.228252	0.943027	-0.422698	0.860806	-1.78786	-1.21366	2	5	0.183518	86.0863	-81	-0.41 * dv stage	-0.47 * sm 30	-0.28 * sm 30 + 0.7 * dv stage -0.51 * ra ≤ 4h	-0.28 * sm 30 + 0.7 * dv stage -0.51 * ra ≤ 4h		tp	tperature
5	602	0.15864	0.952806	-0.173103	0.854532	1.89647	0.902826	2	3	0.109633	91.9202	-108	0.2 * so ∂2h + 0.28 * so 10 +d 0.21 * wd 15d	-0.43 * dv stage -0.19 * hu 10d + 0.3 * sm 30	0.2 * so ∂2h + 0.28 * so 10d + 0.21 * wd 15d	-0.43 * dv stage -0.19 * hu 10d + 0.3 * sm 30		hu	Relative humidity
6	585	0.232092	0.944907	-0.547723	0.78492	-1.562	-1.0175	4	7	0.223052	83.5026	-70	0.43 * wd ∂20min	-0.11 * sm 15 + 0.64 * dv stage + 0.26 * tp ε4h	0.67 * dv stage	-0.11 * sm 15 + 0.64 * dv stage + 0.26 * tp ε4h		so	soar radiation
7	556	0.195655	0.852527	0.0528788	0.734657	-1.1922	-1.09076		3	0.463514	64.5799	-30	-0.2 * hu 4h -0.56 * tp 15d	-0.4 * hu 4h + 0.46 * dv stage	-0.2 * hu 4h -0.56 * tp 15d	-0.4 * hu 4h + 0.46 * dv stage		wd	wd speed
8	471	0.287338	0.922342	0.831475	0.920466	-0.90458	0.0427914	1	6	0.105181	92.33	-111	-0.57 * so 1h NL- + 0.52 * dv stage	0.88 * dv stage	-0.57 * so 1h NL- 0.52 * dv stage	-0.23 * ps 10d -0.19 * tp 6d -0.88 * so ≤ 1h NL-		ps	Atmospheric psure
9	464	0.282656	0.979141	0.91698	0.944989	-0.943833	-0.442042	1	1	0.0629832	94.352	-154	-0.38 * sm 15 + 0.68 * so 1h NL- + 0.2 * tp ∂2h	-0.38 * sm 15 + 0.68 * so 1h NL- 0.2 * tp ∂2h	-0.38 * sm 15 + 0.68 * so 1h NL- + 0.2 * tp ∂2h	-0.38 * sm 15 + 0.68 * so 1h NL- + 0.2 * tp ∂2h		ra	Precipitation
10	457	0.281043	0.926768	0.701829	0.836866	-1.21076	-0.324351	2	3	0.108478	91.5308	-109	0.67 * dv stage -0.15 * tp 10d -0.3 * so 1h	0.63 * dv stage + 0.22 * hu 10d + 0.22 * tp 10d	0.67 * dv stage -0.15 * tp 10d -0.3 * so 1h	0.63 * dv stage + 0.22 * hu 10d + 0.22 * tp 10d		sm 15	Soil moisture 15 cm deep
11	448	0.217936	0.927014	0.689309	0.891868	1.08671	0.0587253	2	8	0.0981542	93.9912	-102	-0.31 * so 15d + 0.5 * so 1h NL-	-0.63 * dv stage -0.36 * so 15d	-0.66 * dv stage + 0.23 * so 10d + 0.54 * so ≤ 1h NL-	0.3 * so 10d + 0.72 * so ≤ 1h NL-		sm 30	Soil moisture 30 cm deep
12	442	0.297886	0.949317	0.769683	0.937127	-2.17734	-0.848564	2	3	0.0557902	97.0247	-153	0.25 * so 4h + 0.17 * tp ε1h	-0.29 * sm 30 + 0.23 * so 15min NL- 0.24 * tp pt.1h	0.25 * so 4h + 0.17 * tp ε1h	-0.29 * sm 30 + 0.23 * so 15min NL- + 0.24 * tp pt.1h		dv stage	Developmental stage
13	422	0.207922	0.948154	0.372318	0.664975	1.48404	1.03511	4	3	0.144303	89.4005	-92	0.2 * so 10d -0.33 * dv stage -0.23 * tp ε4h	0.32 * wd 15d -0.53 * hu 10d -0.47 * tp 4h	0.2 * so 10d -0.33 * dv stage -0.23 * tp ε4h	0.32 * wd 15d -0.53 * hu 10d -0.47 * tp 4h
14	411	0.206007	0.957391	-0.34409	0.821944	2.02121	1.14104	2	3	0.117161	90.74	-112	0.24 * tp 10d -0.21 * tp ε4h	-0.37 * hu 10d -0.49 * tp 4h	0.24 * tp 10d -0.21 * tp ε4h	-0.37 * hu 10d -0.49 * tp 4h		∂	Change from 20 min, 60 min or 120 min ago
15	395	0.223513	0.953832	0.519777	0.983571	0.871437	0.262058	2	5	0.0958133	93.3902	-116	0.59 * so 1h NL-	0.4 * so 1h NL- -0.53 * dv stage	0.26 * tp ∂1h -0.44 * dv stage -0.73 * ra ≤ 4h	0.26 * tp ∂1h -0.44 * dv stage -0.73 * ra ≤ 4h		ε	Fluctuation, residual of daily cyclic variation decomposition
16	388	0.308056	0.839041	0.89325	-0.227052	-1.21756	-0.149924		4	0.200757	82.7595	-80	0.22 * so ∂20min + 0.9 * dv stage + 0.43 * tp 10d	0.22 * so ∂20min + 0.9 * dv stage + 0.43 * tp 10d	0.43 * dv stage	Null model
17	388	0.260897	0.900234	-0.692202	0.810169	1.51598	0.761169	2	7	0.157357	89.4704	-82	0.75 * tp 10d	0.32 * so ∂2h -0.49 * dv stage -0.29 * tp 6d	0.37 * hu 10d -0.7 * dv stage + 0.25 * tp 3d	0.32 * so ∂2h -0.49 * dv stage -0.29 * tp 6d		NL-	Exponentional transformation increasing the effect of low values
18	382	0.263616	0.961474	0.930723	0.876388	0.531496	-0.147658	1	6	0.0364595	97.7057	-166	0.12 * so 3d -0.59 * dv stage + 0.59 * so 4h NL-	-0.72 * tp 15d + 0.58 * so 4h NL-	0.12 * so 3d -0.59 * dv stage + 0.59 * so 4h NL-	-0.16 * tp 15d + 0.72 * so 4h NL- + 0.32 * so 15d		NL+	Exponentional transformation increasing the effect of high values
19	371	0.292416	0.91376	0.802687	0.488898	2.09518	0.61805	3	4	0.0693598	96.0031	-148	0.6 * sm 30 -0.82 * dv stage	0.6 * sm 30 -0.82 * dv stage	-0.45 * dv stage	Null model
20	365	0.230215	0.66486	0.330542	0.504315	-0.733786	-0.832237		6	0.496482	60.0878	-34	-0.59 * tp 15d	Null model	-0.59 * tp 15d	-1.07 * so ∂2h
21	361	0.291655	0.897222	0.92197	0.914765	0.333144	0.689815	1	2	0.0954202	93.426	-116	-0.55 * so 1h NL- + 0.39 * tp 15d -0.17 * field	-0.55 * so 1h NL- + 0.39 * tp 15d -0.17 * field	-0.17 * ps 10d -0.35 * field -1.05 * so ≤ 1h NL-	-0.17 * ps 10d -0.35 * field -1.05 * so ≤ 1h NL-		Model types
22	356	0.333218	0.886691	0.82461	0.40985	-1.20172	-0.607826		3	0.378492	72.2636	-38	0.33 * hu 10d + 0.35 * hu 15d 0.36 * so 15d	0.31 * hu 10d + 0.58 * so 15min NL-	0.33 * hu 10d + 0.35 * hu 15d + 0.36 * so 15d	0.31 * hu 10d + 0.58 * so 15min NL-		1	model in one piece
23	346	0.332345	0.816422	0.143508	0.919935	-0.424834	0.343459		7	0.216121	81.9322	-76	Null model	0.68 * dv stage -0.21 * wd 15d + 0.28 * hu 10d	1.05 * dv stage	0.68 * dv stage -0.21 * wd 15d + 0.28 * hu 10d		2	dry season + wet season
24	342	0.344486	0.959593	0.870605	0.965986	-0.0595457	-0.265192	1	4	0.0654099	95.687	-131	-0.25 * ps 10d -0.51 * so 1h NL-	-0.25 * ps 10d -0.51 * so 1h NL-	-0.27 * so ∂2h + 0.43 * dv stage -0.76 * so ≤ 1h NL-	-0.17 * ps 10d + 0.52 * dv stage -0.75 * so 1h		3	irrigated field + rainfed field
25	342	0.272123	0.821262	-0.336738	0.37402	0.33206	0.17479		7	0.343744	75.8171	-44	1.4 * tp 10d	0.48 * hu 15d -0.71 * dv stage -0.32 * tp 3d	0.28 * hu 3d	0.48 * hu 15d -0.71 * dv stage -0.32 * tp 3d		4	dry season + irrigated field in the wet season + rainfed field in the wet season
26	340	0.32864	0.90772	0.904175	0.429357	-1.72333	-0.882799	3	6	0.148866	88.6148	-98	0.73 * dv stage	0.19 * so ∂20min + 0.67 * dv stage	0.73 * dv stage	-0.32 * so ∂20min		5	wet season + irrigated field in the dry season + rainfed field in the dry season
27	337	0.31946	0.862769	0.2167	0.90764	1.09544	0.506854		3	0.279674	78.1548	-56	-0.41 * so 10d -0.54 * wd 15d	0.4 * dv stage -0.35 * wd 15d + 0.32 * hu 10d	-0.41 * so 10d -0.54 * wd 15d	0.4 * dv stage -0.35 * wd 15d + 0.32 * hu 10d		6	irrigated field + rainfed field in the dry season + rainfed field in the wet season
28	321	0.270916	0.932973	0.474868	0.761583	1.04195	1.10756	4	7	0.197921	86.9405	-77	-0.62 * so 1h NL- + 0.76 * tp 10d	-0.67 * so 1h NL- + 0.35 * wd 15d	-0.67 * so ≤ 1h NL-	-0.67 * so 1h NL- 0.35 * wd 15d		7	rainfed field + irrigated field in the dry season + irrigated field in the wet season
29	296	0.331275	0.884734	0.741766	0.370525	-0.501311	0.198068		7	0.321014	74.978	-48	-0.5 * so 4h NL- + 1.26 * tp 10d	-0.45 * so 4h NL- + 0.44 * tp 15d	-0.56 * so 4h NL-	-0.45 * so 4h NL- 0.44 * tp 15d		8	irrigated field in the dry season + rainfed field in the dry season + irrigated field in the wet season + rainfed field in the wet season
30	288	0.336517	0.954488	0.822853	0.959261	1.70045	0.694151	1	1	0.0708131	94.0849	-147	-0.24 * field + 0.54 * sm 30 -0.58 * so 1h NL-	-0.24 * field + 0.54 * sm 30 -0.58 * so 1h NL-	-0.24 * field + 0.54 * sm 30 -0.58 * so 1h NL-	-0.24 * field 0.54 * sm 30 -0.58 * so 1h NL-
31	287	0.360056	0.958829	0.318161	0.984104	-1.27534	-0.591793	2	5	0.0712298	95.3083	-126	0.39 * wd ∂20min -0.39 * tp ∂2h	0.14 * wd ∂20min + 0.45 * dv stage -0.28 * tp ∂2h	-0.26 * tp ∂1h + 0.54 * dv stage -0.54 * so ≤ 1h NL-	-0.26 * tp ∂1h + 0.54 * dv stage -0.54 * so ≤ 1h NL-
32	284	0.323932	0.920175	0.805643	0.712252	2.08992	1.44907	3	3	0.0668036	94.5723	-146	-0.22 * tp ε1h -0.31 * wd 15d	-0.24 * tp ε1h -0.16 * wd 15d	-0.22 * tp ε1h -0.31 * wd 15d	-0.24 * tp ε1h -0.16 * wd 15d
33	274	0.352097	0.920358	0.374986	0.772536	-1.4416	-0.631876	4	3	0.186566	84.7401	-84	-0.2 * so 10d + 0.4 * tp 4h	0.67 * hu 10d + 0.74 * tp 4h	-0.2 * so 10d + 0.4 * tp 4h	0.67 * hu 10d + 0.74 * tp 4h
34	267	0.281809	0.889802	0.716894	0.344427	-1.42281	-0.418696		3	0.274672	76.6713	-65	0.56 * dv stage	0.5 * dv stage + 0.48 * tp 6d	0.56 * dv stage	0.5 * dv stage + 0.48 * tp 6d
35	263	0.387836	0.66236	0.855686	0.501476	1.5199	0.859917		1	0.424207	65.0695	-39	-0.6 * field -0.35 * wd 15d -0.44 * ra ≤ 4h	-0.6 * field -0.35 * wd 15d -0.44 * ra ≤ 4h	-0.6 * field -0.35 * wd 15d -0.44 * ra ≤ 4h	-0.6 * field -0.35 * wd 15d -0.44 * ra ≤ 4h
36	257	0.355214	0.841962	-0.565099	0.823393	-1.11685	-0.293133		5	0.287325	78.5782	-50	-0.54 * tp 15d	-0.29 * wd 15d + 0.5 * dv stage	-0.25 * sm 30 -0.51 * so 10d -0.67 * wd 15d	-0.25 * sm 30 -0.51 * so 10d -0.67 * wd 15d
37	257	0.339797	0.936791	0.779149	0.585856	-0.516187	-0.954942	4	6	0.252093	85.0302	-50	0.53 * so 4h NL- -0.45 * dv stage -0.24 * tp 15d	0.26 * so 4h NL- -0.29 * tp 15d	0.53 * so 4h NL- -0.45 * dv stage -0.24 * tp 15d	0.68 * so 4h NL- -0.49 * rain.3d -0.4 * tp 15d
38	252	0.407533	0.860872	0.591129	0.266577	-0.864549	-1.45516		3	0.178488	86.5937	-83	0.65 * dv stage + 0.18 * tp ε24h 0.13 * wd 15d	0.54 * hu 10d -0.4 * wd 15d	0.65 * dv stage + 0.18 * tp ε24h + 0.13 * wd 15d	0.54 * hu 10d -0.4 * wd 15d
39	248	0.395241	0.82578	0.858858	0.352741	0.591932	0.836419		7	0.255018	79.6944	-62	-0.47 * wd 15d + 0.98 * dv stage	0.48 * hu 10d	0.77 * dv stage -0.28 * so 3d	0.48 * hu 10d
40	241	0.343182	0.586176	-0.153177	0.593667	0.450834	-0.491153		1	0.983333	0	-1	Null model	Null model	Null model	Null model
41	236	0.301241	0.82831	-0.583038	0.165874	1.28229	0.703624		3	0.267319	76.8214	-67	0.51 * hu 10d + 0.5 * tp 10d	0.56 * sm 30	0.51 * hu 10d + 0.5 * tp 10d	0.56 * sm 30
42	219	0.404741	0.770453	0.127573	0.738929	1.18741	1.42139		7	0.232881	83.5021	-63	-0.68 * wd 15d -0.93 * dv stage	-0.38 * wd 15d -0.29 * so 10d -0.22 * so 1h	0.51 * dv stage	-0.38 * wd 15d -0.29 * so 10d -0.22 * so 1h
43	214	0.34135	0.739051	0.260186	0.667291	0.116683	-0.303927		6	0.346482	77.8641	-35	0.35 * hu 10d + 0.49 * so 15min NL-	-0.21 * hu 15d + 0.39 * so 15min NL-	0.35 * hu 10d + 0.49 * so 15min NL-	0.84 * hu 15d + 0.85 * so ∂2h -1.03 * dv stage
44	204	0.387163	0.915739	0.219582	0.961186	0.496509	0.654639	2	5	0.147972	88.7897	-94	Null model	-0.51 * so 15d + 0.14 * tp ε4h	-0.35 * hu 10d + 1.09 * ra ≤ 4h + 0.37 * sm 15	-0.35 * hu 10d + 1.09 * ra ≤ 4h + 0.37 * sm 15
45	196	0.399895	0.808213	0.604276	0.939762	0.050044	-0.22757		5	0.354055	81.7439	-50	Null model	Null model	0.08 * hu 15d + 0.01 * so 6d -1.29 * ra ≤ 4h	0.08 * hu 15d + 0.01 * so 6d -1.29 * ra ≤ 4h
46	182	0.402521	0.655006	0.835722	0.613573	-2.25348	0.685918		5	0.132248	90.2554	-101	0.55 * dv stage	-0.26 * wd ∂1h + 0.52 * dv stage	-0.22 * field -0.31 * dv stage	-0.22 * field -0.31 * dv stage
47	179	0.392732	0.435879	0.347465	0.762226	-2.26485	-0.148421		5	0.213047	85.4023	-68	0.3 * wd 10d	-0.79 * wd ∂1h + 0.7 * so ∂2h	0.08 * field -0.13 * wd ∂20min -0.15 * so 1h NL+	0.08 * field -0.13 * wd ∂20min -0.15 * so 1h NL+
48	167	0.402724	0.877335	0.278083	0.860497	-0.14425	1.11884		5	0.236701	82.5099	-66	0.43 * so 1h	-0.31 * so ∂2h + 0.68 * so 1h -0.63 * hu 10d	-1.1 * dv stage	-1.1 * dv stage
49	160	0.396306	0.367274	-0.040056	0.582436	1.92751	-0.0540121		2	0.576471	49.8742	-25	-0.98 * field	-0.98 * field	0.23 * so ∂2h	0.23 * so ∂2h
50	159	0.299616	0.754398	0.548497	-0.294081	0.63476	0.678426		8	0.583386	58.4384	-16	0.37 * so ∂20min + 0.88 * hu 10d	Null model	Null model	-1.04 * hu 10d + 1.04 * sm 30
51	151	0.499845	0.871655	0.866775	-0.063615	-1.01219	-1.14345		8	0.210627	84.2261	-77	-1.21 * tp 10d	-0.62 * tp 15d	-0.49 * hu 15d	-0.45 * tp ∂1h
52	124	0.389787	0.816002	0.558114	0.490346	-1.67267	0.221085		7	0.229283	81.3335	-72	0.64 * wd 15d	0.43 * sm 30 -0.46 * dv stage -0.29 * wd 6d	Null model	0.43 * sm 30 -0.46 * dv stage -0.29 * wd 6d
53	59	0.448591	0.177662	0.276179	0.414375	-0.357192	0.601756		4	0.684206	35.9116	-15	Null model	Null model	0.78 * tp ∂20min -0.55 * wd ∂20min	Null model
old version
1	775	0.173767	0.944023	0.722389	0.857335	-0.581935	-0.253384	2	5	0.149132	90.6366	-147.384	-0.6 * dv stage + 0.29 * tp 10d	-0.9 * tp 10d	0.23 * so 10d - 0.8 * dv stage	0.23 * so 10d - 0.8 * dv stage
2	755	0.215743	0.918479	-0.371191	0.780945	0.447422	0.309162	2	8	0.300236	70.2681	-125.594	-0.64 * tp 15d	-0.34 * sm 30 + 0.2 * dv stage	-0.13 * hu 4h + 0.61 * dv stage	-0.53 * hu 4h - 0.83 * so ∂120min
3	743	0.276199	0.961591	-0.231953	0.636852	0.559949	0.32108	4	7	0.283257	75.5354	-128.889	0.3 * dv stage - 0.37 * hu 10d	0.63 * dv stage + 0.35 * tp 4h	0.61 * dv stage + 0.1 * tp 4h	0.63 * dv stage + 0.35 * tp 4h
4	732	0.25654	0.960108	0.491226	0.903032	0.492851	0.187822	2	5	0.108891	92.0516	-153.801	0.16 * dv stage - 0.3 * so 4h NL-	-0.14 * sm 30 + 0.86 * dv stage	-0.29 * so 1h + 0.78 * dv stage	-0.29 * so 1h + 0.78 * dv stage
5	696	0.227339	0.941966	0.826383	0.892822	-0.438126	-0.0288559	1	2	0.117979	88.6519	-155.268	-0.91 * dv stage + 0.19 * so 1h NL-	-0.91 * dv stage + 0.19 * so 1h NL-	0.42 * so 15d + 0.66 * so 1h NL-	0.42 * so 15d + 0.66 * so 1h NL-
6	662	0.22312	0.939997	-0.437821	0.828988	0.631071	0.388253	2	8	0.29186	60.1526	-126.332	-0.38 * tp 15d	0.31 * so 10d + 0.27 * tp 15d	-0.39 * so 10d + 0.37 * tp ε4h	0.58 * tp ε4h - 0.46 * wd 15d
7	658	0.197995	0.948838	-0.27847	0.789285	-0.611176	-0.290324	2	5	0.264327	83.6291	-132.47	-0.22 * wd ∂20min	-0.27 * so 10d - 0.63 * dv stage	0.17 * sm 15 - 0.86 * dv stage	0.17 * sm 15 - 0.86 * dv stage
8	618	0.289308	0.922601	0.766444	0.939108	0.288327	-0.0524461	1	2	0.137027	88.282	-153.146	0.84 * dv stage - 0.26 * so 1h NL-	0.84 * dv stage - 0.26 * so 1h NL-	-0.95 * so 1h NL-	-0.95 * so 1h NL-
9	609	0.239747	0.702674	0.338604	0.464185	0.224508	0.257162		8	0.366029	81.8585	-120.431	-0.58 * hu 3d - 0.59 * dv stage	-0.6 * hu 15d 0.44 * dv stage	0.25 * hu 3d + 0.54 * dv stage	-0.9 * so ∂120min
10	557	0.205297	0.955407	-0.00695847	0.671027	-0.565493	-0.372088	4	3	0.384223	46.6187	-124.501	0.32 * so 10d - 0.31 * tp 4h	-0.59 * hu 10d - 0.53 * tp 4h	0.32 * so 10d - 0.31 * tp 4h	-0.59 * hu 10d - 0.53 * tp 4h
11	545	0.316816	0.964255	0.853922	0.947049	0.530256	0.170092	1	2	0.102194	90.7389	-159.011	-0.74 * sm 30 + 0.52 * so 1h NL-	-0.74 * sm 30 + 0.52 * so 1h NL-	-0.31 * sm 15 + 0.85 * so 1h NL-	-0.31 * sm 15 + 0.85 * so 1h NL-
12	541	0.297866	0.956457	-0.201892	0.850556	0.502834	0.260492	2	8	0.159178	83.4106	-140.351	-0.26 * hu 3d - 0.34 * tp ∂120min	0.15 * so 15d + 0.4 * dv stage	-0.24 * tp ∂120min + 0.57 * dv stage	-0.48 * so ∂120min + 0.43 * dv stage
13	465	0.341949	0.93717	0.88601	0.411002	0.523498	0.228684	3	4	0.193046	80.708	-138.881	0.17 * field + 0.85 * dv stage	0.17 * field + 0.85 * dv stage	0.19 * so ∂20min + 0.95 * dv stage	-0.42 * so ∂20min + 0.27 * sm 30
14	445	0.297877	0.938304	0.878727	0.83147	-0.165402	-0.240471	1	3	0.147523	87.9765	-149.445	0.6 * dv stage - 0.59 * so 1h NL-	0.24 * tp 15d - 0.75 * so 4h NL-	0.6 * dv stage - 0.59 * so 1h NL-	0.24 * tp 15d - 0.75 * so 4h NL-
15	442	0.326894	0.845353	-0.431799	0.17775	-0.326755	-0.195013		6	0.247478	75.1283	-132.408	0.56 * hu 10d + 0.49 * tp 10d	-0.37 * tp 3d - 0.23 * tp ε4h	0.56 * hu 10d + 0.49 * tp 10d	-0.76 * dv stage - 0.71 * tp ε4h
16	441	0.315813	0.969943	0.326579	0.902794	0.627078	0.339908	2	8	0.142515	84.6197	-143.232	0.32 * so 4h - 0.1 * hu 10d	0.38 * hu 10d + 0.52 * tp 4h	0.52 * tp ε1h + 0.14 * hu 10d	0.34 * so 15min NL- + 0.53 * tp 4h
17	432	0.254618	0.959802	-0.0379541	0.86334	-0.528222	-0.384276	2	8	0.170181	83.3334	-138.609	-0.46 * so 1h NL- + 0.42 * tp 6d	-0.26 * so 1h NL- - 0.38 * tp 6d	-0.2 * tp 4h - 0.41 * so 1h NL-	0.5 * wd 15d - 0.83 * so 1h NL-
18	431	0.346849	0.824282	-0.0445865	0.908908	0.204669	-0.129796		6	0.255092	56.8826	-131.618	-0.49 * so 10d - 0.58 * wd 15d	0.93 * dv stage - 0.34 * wd 15d	-0.49 * so 10d - 0.58 * wd 15d	-0.3 * so 10d + 0.72 * dv stage
19	413	0.348508	0.835079	0.637854	0.24006	0.106593	0.147936		6	0.363802	73.5311	-125.925	0.64 * hu 10d + 0.54 * tp 10d	0.36 * tp 10d	0.64 * hu 10d + 0.54 * tp 10d	1.05 * tp ∂60min
20	408	0.326285	0.903688	-0.249049	0.834409	0.514087	0.112553		6	0.289795	50.4693	-128.295	0.45 * dv stage - 0.44 * tp 15d	0.52 * ra 1h - 0.72 * sm 30	0.45 * dv stage - 0.44 * tp 15d	-0.76 * ra 1h + 0.93 * dv stage
21	406	0.345995	0.889012	0.745895	0.743044	-0.721119	-0.635812		8	0.192922	83.6814	-135.341	-0.24 * tp ε1h - 0.39 * wd 15d	0.28 * sm 15 + 0.2 * so 15d	-0.32 * so 15d - 0.31 * so 1h	-0.31 * tp ε1h - 0.31 * so 10d
22	396	0.341064	0.973836	0.802593	0.982572	-0.351337	-0.130756	1	5	0.12791	90.1998	-154.94	-0.69 * so 1h NL-	-0.68 * tp 15 min	-0.96 * so 1h NL-	-0.96 * so 1h NL-
23	396	0.29034	0.923973	-0.288995	0.944967	-0.487234	-0.0609777	2	5	0.182075	86.2118	-140.405	0.21 * dv stage + 0.33 * so 1h NL-	0.12 * sm 30 - 0.62 * dv stage	-0.6 * ra 1h - 0.54 * dv stage	-0.6 * ra 1h - 0.54 * dv stage
24	394	0.283479	0.797852	-0.519599	0.620293	-0.292695	-0.0644537		8	0.198553	76.694	-134.591	-0.56 * ra 1h + 1.09 * dv stage	-0.52 * dv stage + 0.17 * so 15 min.NL-	-0.44 * ra 1h + 0.27 * hu 3d	0.54 * hu 3d + 0.89 * tp ∂120min
25	393	0.30118	0.968003	0.961993	0.970596	-0.0380265	0.0877777	1	1	0.0891102	91.8957	-166.137	-0.19 * dv stage + 0.88 * so 1h NL-	-0.88 * so 1h NL- - 0.19 * dv stage	-0.19 * dv stage + 0.88 * so 1h NL-	-0.19 * dv stage + 0.88 * so 1h NL-
26	387	0.387705	0.937607	0.839485	0.391526	0.429256	0.221508	3	8	0.133463	83.7346	-144.942	-0.27 * hu 10d + 0.65 * dv stage	-0.38 * sm 30 + 0.65 * dv stage	0.53 * dv stage + 0.35 * tp 4h	0.9 * hu 6d - 0.55 * sm 30
27	380	0.377903	0.925177	0.803633	0.528469	0.108052	0.213768	3	8	0.218087	83.6361	-133.924	0.61 * so 3d - 0.85 * tp 15d	-0.52 * tp 15d - 0.29 * sm 15	0.31 * tp 15d - 0.62 * ra 4h	-0.8 * ra 4h
28	379	0.346193	0.887319	0.864123	0.328136	0.245063	-0.00924941		6	0.241086	78.8384	-133.09	-0.32 * so 24h 0.82 * dv stage	-0.16 * so 24h + 0.63 * dv stage	-0.32 * so 24h 0.82 * dv stage	-0.89 * so 4h NL- - 0.43 * dv stage
29	372	0.342703	0.840216	0.028501	0.879883	-0.371951	-0.182555		8	0.209424	78.7654	-133.202	-0.54 * wd 15d - 0.47 * hu 10d	-0.45 * wd 15d + 0.59 * hu 10d	0.09 * hu 10d + 0.92 * dv stage	0.22 * hu 10d + 0.76 * dv stage
30	370	0.369998	0.951491	0.243311	0.976848	0.280595	0.0825939	2	5	0.094443	91.355	-157.51	-0.44 * tp ∂120min + 0.48 * wd ∂20min	-0.33 * tp ∂120min + 0.5 * dv stage	0.45 * dv stage - 0.67 * so 1h NL-	0.45 * dv stage - 0.67 * so 1h NL-
31	361	0.328495	0.950109	0.171805	0.606514	-0.753661	-0.522389	4	7	0.300979	53.5638	-127.308	0.3 * ps 15d + 0.18 * dv stage	-0.08 * ps 15d - 0.49 * dv stage	0.03 * ps 15d - 0.22 * dv stage	-0.08 * ps 15d - 0.49 * dv stage
32	345	0.330394	0.910517	0.860503	0.415329	0.550386	0.282316	3	6	0.378249	54.7991	-123.132	0.4 * hu 15d + 0.32 * so 15d	0.2 * hu 15d + 0.38 * so 15d	0.4 * hu 15d + 0.32 * so 15d	0.85 * tp ∂60min
33	326	0.327021	0.966695	0.885018	0.977868	0.016784	0.0314339	1	1	0.082487	93.3359	-168.15	0.3 * dv stage - 0.82 * so 1h NL-	0.3 * dv stage - 0.82 * so 1h NL-	0.3 * dv stage - 0.82 * so 1h NL-	0.3 * dv stage - 0.82 * so 1h NL-
34	323	0.426392	0.631249	0.799776	0.481701	-0.538046	-0.259826		6	0.39093	55.079	-122.272	-0.48 * ra 24h - 0.47 * wd 15d	-0.3 * ra 1h - 0.45 * wd 15d	-0.48 * ra 24h - 0.47 * wd 15d	-0.82 * ra 1h
35	317	0.40289	0.739451	0.0819738	0.659152	-0.443362	-0.473039		7	0.368461	67.0902	-122.037	-0.95 * dv stage - 0.69 * wd 15d	-0.3 * so 1h 0.3 * dv stage	-0.08 * tp15d + 0.5 * dv stage	-0.3 * so 1h + 0.3 * dv stage
36	312	0.284875	0.95579	0.63396	0.970632	-0.270647	-0.053344	2	5	0.123075	86.9375	-150.61	0.66 * tp ∂120min - 0.29 * wd ∂20min	0.51 * sm 30 + 0.88 * so 1h NL-	-0.48 * dv stage + 0.62 * so 1h NL-	-0.48 * dv stage + 0.62 * so 1h NL-
37	284	0.375027	0.929351	0.800763	0.880803	-0.141213	-0.0654983	1	3	0.13124	89.6997	-152.492	0.72 * dv stage - 0.46 * so 4h NL-	-0.25 * so 1h + 0.74 * dv stage	0.72 * dv stage - 0.46 * so 4h NL-	-0.25 * so 1h + 0.74 * dv stage
38	283	0.343675	0.927117	0.904926	0.865705	0.013271	-0.0549806	1	3	0.124236	91.9187	-153.922	0.41 * so 1h - 0.78 * dv stage	0.38 * so 3d - 0.75 * dv stage	0.41 * so 1h - 0.78 * dv stage	0.38 * so 3d - 0.75 * dv stage
39	273	0.503716	0.626833	-0.290138	0.432019	-0.0128435	0.231462		8	0.399437	69.559	-116.377	0.24 * dv stage - 0.29 * tp 3d	1.58 * hu 10d - 0.72 * dv stage	0.09 * hu 10d + 0.39 * dv stage	0.61 * hu 10d -0.6 * sm 30
40	269	0.426327	0.943726	0.800708	0.803133	-0.276645	-0.10334	1	4	0.134715	86.7925	-148.255	-0.99 * dv stage + 0.13 * ra 1h	-0.99 * dv stage + 0.13 * ra 1h	-0.62 * dv stage + 0.87 * ra 1h	-0.34 * dv stage + 1.14 * ra 1h
41	256	0.310058	0.852391	0.749089	0.0391442	0.375525	0.123135		1	0.483178	51.4097	-122.086	0.25 * so ∂20min + 0.73 * dv stage	0.25 * so ∂20min + 0.73 * dv stage	0.25 * so ∂20min + 0.73 * dv stage	0.25 * so ∂20min + 0.73 * dv stage
42	256	0.418663	0.792132	0.885962	0.0283296	0.262932	-0.143664		4	0.301728	78.9324	-127.243	0.54 * dv stage + 0.48 * tp 10d	0.54 * dv stage + 0.48 * tp 10d	0.93 * dv stage - 0.1 * tp 10d	-0.22 * dv stage - 0.53 * wd 6d
43	220	0.319076	0.809375	0.695263	-0.219941	-0.114636	-0.215861		3	0.55066	61.6501	-116.902	0.6 * hu 10d + 0.43 * tp 10d	0.5 * tp 15d	0.6 * hu 10d + 0.43 * tp 10d	0.5 * tp 15d
44	219	0.435358	0.325575	0.283165	0.416437	1.09865	-0.197434		5	0.614979	63.1725	-108.689	-0.05 * wd ∂60min + 0.07 * dv stage	-0.46 * wd ∂60min + 0.26 * dv stage	0.47 * sm 30 + 0.5 * ps 24h	0.47 * sm 30 + 0.5 * ps 24h
45	172	0.512638	0.903409	0.389907	0.868667	0.16693	-0.145754		7	0.586125	60.8607	-113.497	0.65 * tp 15d	0.4 * so 6d + 0.52 * so 1h NL+	0.27 * so 1h NL+	0.4 * so 6d + 0.52 * so 1h NL+
46	172	0.523301	0.8748	0.89344	0.800131	-0.0383607	0.036794		4	0.117909	86.4517	-151.727	0.36 * hu ∂120min - 0.81 * tp 10d	0.36 * hu ∂120min - 0.81 * tp 10d	-0.35 * tp ∂120min + 0.51 * ra 1h	0.43 * ra 1h - 0.84 * so ∂120min
47	163	0.482995	0.95744	0.632391	0.620656	0.565825	0.278765		7	0.422309	47.9243	-122.039	-0.16 * tp 6d	-0.45 * hu 10d + 0.2 * wd 15d	0.35 * wd 15d	-0.45 *hu 10d + 0.2 * wd 15d
48	158	0.437864	0.828264	0.782889	0.711942	0.514225	-0.218614		5	0.293294	86.2632	-127.982	-0.12 * wd ∂20min + 0.4 * dv stage	-0.26 * wd ∂60min + 0.39 * dv stage	-0.29 * field - 0.73 * dv stage	-0.29 * field - 0.73 * dv stage
49	133	0.398265	0.824003	0.571525	0.332461	0.394534	-0.0791286		8	0.346713	59.9575	-121.844	0.6 * wd 15d	0.53 * ps 15 min - 0.56 * wd 6d	0.45 * ps 15 min - 0.35 * tp 3d	0.68 * ps 10d + 0.98 * wd 15d
50	106	0.505409	0.112236	0.256583	0.446098	0.091695	-0.127364		3	0.556812	42.0592	-114.834	0.59 * tp ∂20min - 0.42 * wd ∂20min	-0.32 * wd 15 min - 0.47 * so 1h NL+	0.59 * tp ∂20min - 0.42 * wd ∂20min	-0.32 * wd 15 min - 0.47 * so 1h NL+

## Sheet: D
Supplementary file 1D: model profiles for the 53 clusters in the two-season analysis
Cluster	irr.dry.1	irr.dry.2	irr.dry.3	irr.dry.4	irr.dry.5	irr.dry.6	irr.dry.7	irr.dry.8	irr.dry.9	irr.dry.10	irr.dry.11	irr.dry.12	irr.dry.13	irr.dry.14	irr.dry.15	rainf.dry.1	rainf.dry.2	rainf.dry.3	rainf.dry.4	rainf.dry.5	rainf.dry.6	rainf.dry.7	rainf.dry.8	rainf.dry.9	rainf.dry.10	rainf.dry.11	rainf.dry.12	rainf.dry.13	rainf.dry.14	rainf.dry.15	irr.wet.1	irr.wet.2	irr.wet.3	irr.wet.4	irr.wet.5	irr.wet.6	irr.wet.7	irr.wet.8	irr.wet.9	irr.wet.10	irr.wet.11	irr.wet.12	irr.wet.13	irr.wet.14	irr.wet.15	rainf.wet.1	rainf.wet.2	rainf.wet.3	rainf.wet.4
1	1.24428	1.27134	0.790955	0.770223	1.0146	1.18744	0.912036	0.987493	1.08264	0.865985	0.410939	0.711273	0.475504	0.0450753	-0.622681	1.19777	0.710694	0.248194	0.139538	-0.0334088	-0.460334	-0.52932	-0.761162	-1.29205	-1.30643	-1.49189	-1.81345	-1.80935	-1.84913	-2.09678	1.78691	1.47173	1.35607	1.13253	0.713911	0.484562	0.483608	0.445225	0.227591	-0.22529	-0.0667918	-0.323358	-0.371891	-0.415392	-1.88667	0.695879	0.467867	0.464532	0.380261
2	-0.602128	-0.585283	-1.34328	-0.972705	-1.2759	-1.05693	-0.669506	-0.602128	-1.34328	-0.972705	-0.821105	-1.20853	-0.736883	-0.433684	-0.585283	-0.455761	-0.138297	-0.00555262	0.304018	0.613983	0.594091	0.831556	0.946776	1.05886	1.28672	1.40156	1.40385	1.78497	1.94955	1.63301	-1.52467	-0.99552	-1.67449	-1.18766	-1.28068	-0.833937	-0.836775	-0.853209	-0.220514	-0.0119236	0.124323	0.22235	0.226099	0.606963	0.943476	-0.754257	-0.194533	-0.92216	-0.202653
3	-1.62496	-1.53624	-1.44753	-1.35881	-1.2701	-1.18138	-1.09267	-1.00395	-0.91524	-0.826525	-0.73781	-0.649096	-0.560381	-0.460909	-0.35068	-0.432924	-0.27708	-0.0590709	0.158938	0.433427	0.70223	0.908868	1.31352	1.48102	1.83502	1.94035	1.98352	2.21319	2.31853	0.496753	-1.04923	-0.953244	-0.857258	-0.761271	-0.665285	-0.569298	-0.425319	-0.377326	-0.281339	-0.185353	-0.0893666	0.0349357	0.187554	0.340172	0.492791	-0.455359	-0.551584	-0.150489	0.0641109
4	-0.257989	-0.34842	-0.438851	-0.529282	-0.619713	-0.710145	-0.800576	-0.891007	-0.981438	-1.07187	-1.1623	-1.25273	-1.34316	-1.44456	-1.55692	0.31921	0.365311	0.457512	0.549713	0.688015	0.826317	0.918518	1.14902	1.19512	1.37952	1.37952	1.33342	1.42562	1.42562	-0.00349444	-1.33082	-1.20194	-1.06919	-0.94031	-0.811428	-0.682546	-0.489224	-0.428647	-0.295901	-0.170883	-0.0381376	0.124901	0.333686	0.538608	-1.27061	-0.381287	-0.628048	0.0180973	0.326988
5	1.01436	0.934197	0.57828	0.877446	0.800026	0.928031	0.837906	1.02986	1.40856	1.44814	0.878898	0.969675	1.31713	0.955948	0.245077	0.709613	0.37114	-0.125887	-0.185302	-0.271074	-0.654487	-0.797143	-1.04779	-1.48056	-1.60822	-1.75868	-1.99779	-2.14462	-2.10766	-1.12509	1.26049	0.739821	1.34469	1.04409	0.866271	0.555233	0.730382	0.677414	0.184405	0.162187	-0.0763071	-0.181903	-0.322019	0.0146343	-0.228191	0.567139	0.319875	0.225753	0.094557
6	-0.392558	-0.789829	-0.246892	-0.23365	-1.1871	-0.975222	-0.352831	-0.498497	-0.948737	-1.50492	-0.763344	-1.39898	-0.591194	-1.37249	-0.45877	-0.289545	0.00091503	-0.083249	0.353148	0.68132	0.474816	0.756324	0.554232	0.786881	0.966779	1.42568	1.39284	1.9909	1.89985	0.804122	-1.50112	-1.36607	-1.23102	-1.09596	-0.96091	-0.825856	-0.623276	-0.555749	-0.420696	-0.285642	-0.150589	0.0243056	0.239041	0.453776	0.668511	-0.810341	-0.455794	-0.529135	0.309841
7	0.289875	0.229748	0.386132	0.543498	-0.0673394	-0.126189	-0.547495	-0.878848	-0.901577	-1.24657	-1.13383	-1.23358	-1.22304	-1.16846	-1.86383	-0.0499704	0.0842996	0.121463	0.634449	0.112313	0.497188	0.367398	0.744581	0.881016	0.347415	1.11504	1.40685	1.23254	1.50493	-0.0580029	-1.35248	-1.06927	-0.96332	-0.789686	-0.664135	-0.325663	-0.231662	-0.0957988	-0.0871345	-0.582438	-0.383526	-0.0105848	-0.418735	-0.378126	-0.828109	-0.333243	0.057976	0.314865	0.0955261
8	-1.56832	-1.4412	-0.484477	-0.437222	-0.797853	-1.02228	-0.643741	-0.677737	-0.785123	-0.490237	0.319216	-0.441244	-0.318888	0.460001	1.54475	-0.886846	-0.696489	-0.506132	-0.315775	-0.136971	0.0302803	0.197532	0.388181	0.602227	0.816274	1.03032	1.24437	1.45841	1.67246	1.88651	-1.06912	-1.02113	-0.995194	-0.86164	-0.627671	-0.477845	-0.268013	-0.328731	-0.18497	0.959911	0.489615	0.460204	0.395068	0.64271	3.20774	-0.549184	-0.415926	-0.381892	-0.610063
9	-0.00870845	-0.0862851	-1.20896	-1.13769	-0.365324	0.0840984	-0.507512	-0.0722467	0.477438	-0.0141737	-1.41447	-0.00401263	0.244344	-0.89043	-2.10849	0.885776	0.952737	-0.520178	-0.395531	0.475789	1.02417	0.630464	1.27143	1.38692	1.05153	-0.40213	1.05391	1.45848	0.247546	-2.10849	0.218872	0.3224	0.711289	0.467544	0.22134	0.22362	0.129951	0.333338	0.277079	-1.20191	-0.586733	-0.185191	0.263876	-0.112538	-3.21046	0.565213	0.50794	1.07	0.813884
10	-1.43838	-1.37129	-0.709178	-0.643305	-0.812491	-1.12595	-0.661256	-0.739369	-1.12892	-0.575885	-0.0427476	-0.63452	-0.377068	0.362102	0.817579	-1.4808	-0.942899	-0.391856	-0.310949	-0.173078	0.298013	0.369032	0.587132	1.19388	1.17941	1.38501	1.75956	1.75926	1.76906	2.0799	-1.55081	-1.37122	-1.49662	-1.20946	-0.617571	-0.367196	-0.252011	-0.339074	-0.0903672	0.520773	0.457238	0.660448	0.609517	0.792993	1.82073	-0.995955	-0.675225	-0.717042	-0.632355
11	1.59151	1.29401	0.416068	0.272942	0.663903	0.880386	0.290676	0.516109	0.897535	0.61427	-0.157663	0.712424	0.577191	0.0959597	-0.51502	1.1815	0.727566	0.60986	0.236695	-0.00779042	-0.279736	-0.748796	-0.797021	-0.771578	-1.02334	-1.21433	-1.41713	-1.70743	-1.61709	-1.32167	1.43547	1.09886	1.17137	1.18486	0.820378	0.524814	0.553445	0.497707	0.00754253	-0.875768	-0.387965	-0.799006	-0.975426	-0.658152	-3.15768	0.536633	0.275149	0.541075	0.727995
12	-0.916078	-0.778293	-1.41499	-1.44647	-0.926985	-0.783924	-0.963063	-1.26145	-0.879391	-1.16512	-1.16081	-0.694583	-0.434863	-1.45762	-2.04643	0.69558	0.513563	0.2453	0.369962	1.08264	1.34926	1.20876	1.55721	1.67227	1.5954	1.47712	1.76636	1.9459	1.34298	-0.492223	-0.485674	-0.156426	-0.153135	0.152211	-0.483107	-0.389782	-0.570556	-0.358591	-0.061704	-1.00692	-0.587485	-0.600899	-0.231703	0.0676299	-1.49808	0.577991	0.465746	0.871688	0.7434
13	0.936376	0.999347	0.986101	0.823193	0.802706	0.917917	0.909002	1.15749	0.858212	0.857605	0.468393	0.444752	0.230341	0.353904	0.384979	1.63617	0.533388	-0.0212933	0.0536298	-0.999534	-1.18319	-0.981854	-1.16946	-1.54067	-0.73002	-1.09757	-1.58785	-1.54177	-1.55563	-0.944665	1.3323	0.840257	1.27545	0.834488	0.907268	0.587573	1.10747	0.772868	0.160892	0.593494	0.310068	-0.152753	-0.249276	-0.624543	0.06775	0.735517	0.0693783	0.229737	0.240404
14	0.48505	0.612012	0.716497	0.553141	0.590695	1.04751	0.968734	1.42648	1.38956	1.38124	1.12995	1.33772	0.881487	1.07783	1.56115	0.18288	-0.422714	-0.528477	-0.310594	-1.2139	-1.04256	-1.00577	-1.22746	-1.47488	-1.25935	-1.45781	-1.69914	-1.62786	-1.41406	-0.657354	1.01781	0.629521	0.927646	0.348546	0.414235	0.219331	0.726546	0.539115	0.273595	0.774575	0.606036	0.39722	0.554331	0.133376	0.995944	-0.0363572	-0.451901	-0.500851	-0.176109
15	0.882307	0.857495	-0.183929	-0.110865	0.462033	0.868021	0.535123	0.707753	0.970318	0.739927	-0.121031	0.941832	0.922864	0.115241	-1.05131	0.669147	0.538322	-0.282088	-0.346522	-0.0649916	0.110238	-0.21573	-0.212802	-0.16288	-0.447339	-1.15952	-0.566746	-0.707794	-1.3838	-2.30327	0.866726	0.802807	1.11517	1.0104	0.778434	0.953476	0.762399	0.595819	0.0402115	-0.0592752	0.0518967	0.0490301	-0.037375	-0.607208	-3.52817	0.656447	0.532449	0.784731	0.619878
16	-2.2093	-2.62545	-1.81468	-1.69247	-1.23772	-0.950556	-0.757551	-0.281582	-0.0406847	0.0104902	0.643522	0.101659	0.301008	0.47898	0.74287	-1.02032	-1.42867	-0.610107	-0.480089	-0.0264794	0.250624	0.433565	0.917559	1.18457	1.26186	1.921	1.40525	1.63071	1.8179	2.0741	-0.719612	-0.631881	-0.544149	-0.456418	-0.368687	-0.280955	-0.149358	-0.105492	-0.0177609	0.0699706	0.157702	0.271314	0.410807	0.5503	0.689793	0.0749618	0.0749618	0.0749618	0.0749618
17	-0.766042	-0.319485	-0.198019	0.0138222	0.428483	0.8222	0.760984	1.13263	1.46368	1.45611	1.45708	1.50927	1.22623	1.28068	1.10218	0.982619	0.249494	-0.419845	-0.301774	-0.643807	-0.116803	-0.978236	-0.844004	-0.432384	-1.19342	-1.79567	-1.27087	-1.22588	-1.6682	-1.71103	0.939598	1.14656	0.534373	0.6347	0.839214	0.892988	0.541608	0.716932	0.625273	-0.0529786	-0.0115793	0.142793	0.0489462	-0.397305	-0.892357	0.380442	0.418578	1.05584	0.293722
18	1.51946	1.50743	0.523918	0.155648	0.747892	0.981368	0.852252	0.270201	0.332208	0.0800378	0.0180355	0.264887	0.257263	-1.05296	-2.47142	1.02978	0.974862	0.440034	0.0649794	0.473696	0.562451	0.117613	-0.554646	-0.420222	-0.674227	-0.71763	-0.637449	-0.481267	-1.63219	-2.53201	0.888167	1.01158	1.10029	1.25884	0.448544	0.221815	0.238208	0.287868	0.212545	-1.25831	-0.536584	-0.849012	-0.554681	-0.331283	-3.24543	0.350553	0.61048	0.598866	0.771742
19	1.93975	1.81275	1.68575	1.55875	1.43175	1.30475	1.17776	1.05076	0.923759	0.79676	0.669761	0.542763	0.415764	0.273366	0.115569	0.511226	0.327832	0.09515	-0.137532	-0.411364	-0.677058	-0.893462	-1.27422	-1.4743	-1.82225	-1.97304	-2.07455	-2.32392	-2.47472	-1.09757	0.979772	0.888489	0.797206	0.705923	0.61464	0.523357	0.386433	0.340792	0.249509	0.158226	0.0669431	-0.0512683	-0.196408	-0.341548	-0.486687	-0.309025	-0.309025	-0.309025	-0.309025
20	0.588585	0.481106	0.64684	0.570521	0.302389	0.0455459	-0.259956	-0.727805	-0.800511	-0.8258	-1.03206	-1.25933	-1.09258	-1.13683	-1.0035	0.366893	0.366893	0.366893	0.366893	0.366893	0.366893	0.366893	0.366893	0.366893	0.366893	0.366893	0.366893	0.366893	0.366893	0.366893	-1.29047	-1.10054	-1.0312	-0.651697	-0.445711	-0.139065	0.025179	-0.0255121	0.0409998	-0.281542	-0.034273	-0.00752372	-0.254717	-0.684904	-0.360796	-0.44422	0.375981	-1.64992	0.0442759
21	-0.781859	-0.699426	0.203418	0.175447	-0.224463	-0.471322	0.013278	0.104396	-0.106324	0.127283	1.06136	0.17171	0.0986333	0.893257	1.93318	-1.115	-1.03257	-0.129725	-0.157696	-0.557607	-0.804466	-0.319866	-0.228747	-0.439468	-0.205861	0.728221	-0.161433	-0.234511	0.560113	1.60004	0.0704172	-0.145782	-0.28067	-0.375713	-0.306249	-0.0677302	0.172441	-0.0747297	-0.0672522	1.57922	0.164461	0.2352	0.0329301	0.0645235	4.17255	-0.619398	-0.835598	-0.970485	-1.06553
22	-2.40495	-2.10385	-1.81989	-1.78314	-1.24017	-0.346766	-0.268687	-0.600422	-0.160266	-0.143774	0.233952	0.846262	0.578148	0.00825552	0.192417	0.200768	-0.249945	0.0251566	0.0243159	0.0921147	0.967835	0.685191	0.767328	1.35785	0.743233	0.939278	1.48744	1.32388	0.391605	0.25682	-0.469585	-0.0897291	-0.741042	-0.586277	0.0648866	0.00859686	-0.250876	-0.11317	0.111073	-0.381365	-0.114499	0.0940432	-0.290239	-0.831341	-0.969169	0.257232	0.742134	0.401098	0.223478
23	-0.212417	-0.212417	-0.212417	-0.212417	-0.212417	-0.212417	-0.212417	-0.212417	-0.212417	-0.212417	-0.212417	-0.212417	-0.212417	-0.212417	-0.212417	-2.03378	-1.36997	-0.647778	-0.515918	-0.370107	0.141081	0.138977	0.222742	0.721523	0.361381	0.679308	1.16408	1.30553	1.48939	1.8998	-1.38488	-1.17304	-0.961198	-0.749356	-0.537515	-0.325674	-0.00791186	0.0980088	0.30985	0.521691	0.733533	1.00787	1.34469	1.68152	2.01835	-2.20745	-1.55132	-1.62869	-1.22902
24	-0.684769	-0.553053	0.441046	0.375471	-0.154404	-0.610198	-0.412642	-0.450265	-0.535644	-0.222818	0.661038	-0.172894	-0.162783	0.67362	1.8083	-0.684769	-0.553053	0.441046	0.375471	-0.154404	-0.610198	-0.412642	-0.450265	-0.535644	-0.222818	0.661038	-0.172894	-0.162783	0.67362	1.8083	-1.29201	-1.06925	-1.55393	-0.987592	-1.12377	-0.776893	-0.371865	-0.644353	-0.300531	1.25875	0.513727	0.260311	0.0572163	0.578538	3.4627	-0.827775	-1.05632	-1.66095	-1.43763
25	-2.67581	-1.84312	-1.61663	-1.22161	-0.448395	0.285767	0.171617	0.864626	1.48193	1.46782	1.46962	1.56695	1.03915	1.14069	0.807851	1.39264	0.0572449	-0.296256	-0.128697	0.156828	0.223345	-0.0167582	-0.606404	-0.598084	-0.334935	-0.225797	0.012791	-0.623207	-0.877934	-0.625226	0.1574	0.291712	0.0505066	-0.275371	0.387135	0.476578	-0.145438	-0.136321	0.147041	0.182433	0.376155	0.44086	-0.0397861	-0.404258	-0.197725	0.86794	1.06547	0.515157	0.161834
26	-1.91964	-1.7692	-1.61875	-1.46831	-1.31786	-1.16742	-1.01697	-0.866529	-0.716084	-0.565639	-0.415194	-0.264749	-0.114304	0.054383	0.241312	0.0886527	-0.454944	0.194151	0.219377	0.415405	0.47205	0.674176	0.918284	1.00242	1.09421	1.67126	1.23463	1.58713	1.74073	2.06745	-1.63748	-1.47471	-1.31193	-1.14915	-0.986376	-0.823599	-0.579434	-0.498046	-0.335269	-0.172493	-0.00971614	0.20108	0.459894	0.718709	0.977524	0.303888	0.143665	0.418426	0.868528
27	0.00972791	0.185495	0.467844	0.50518	0.616494	1.23531	0.741063	0.82241	0.700626	-0.250269	0.063015	0.556107	0.171911	0.738397	1.65253	-2.80039	-2.01712	-1.22863	-1.07312	-0.878112	-0.307274	-0.427415	-0.403355	0.0248548	-0.628973	-0.311739	0.179477	0.272986	0.514798	0.868172	-1.07731	-0.529266	-0.856914	-0.615187	0.0180706	0.206848	0.105118	0.271711	0.550494	0.487571	1.02013	1.14818	1.66012	0.620865	0.790968	-1.99788	-1.38847	-1.61177	-1.17422
28	-1.49868	-1.01974	0.211534	0.348465	0.159058	0.126038	0.418238	0.611167	0.667256	0.904742	1.82187	0.743769	0.477117	1.39169	2.45213	-0.109054	-0.447695	0.372721	0.0420135	-0.826364	-1.41675	-0.936363	-1.11849	-1.2254	-0.483235	0.19432	-0.923578	-0.96723	-0.575288	0.60573	0.288449	0.225843	0.172355	0.21794	0.249453	0.289895	0.440892	0.269077	0.286012	1.40987	0.642154	0.505164	0.343295	0.267484	2.69883	-0.247131	-0.356405	-0.455112	-0.826615
29	-3.13261	-2.42243	-1.61562	-0.998967	-0.878678	-0.508054	-0.485964	0.32564	0.706878	0.89191	0.756479	0.583091	0.111655	1.15937	1.74746	-0.722784	-0.680455	-0.287509	-0.00888547	-0.306924	-0.368485	-0.0345989	0.470083	0.371813	0.56009	0.595476	0.539787	0.421613	1.27359	1.93702	0.0667122	-0.218833	-0.274451	-0.356704	0.0106211	0.00977126	0.046378	-0.0488513	-0.286439	0.897901	0.116666	0.168375	-0.171386	-0.273984	1.79974	0.52054	0.129021	0.0287906	-0.324682
30	0.467117	0.487735	1.35311	1.2924	0.816346	0.478989	0.755613	0.612164	0.393984	0.585429	1.30085	0.417655	0.433416	1.10451	2.07387	-0.442707	-0.483581	0.258811	0.0751145	-0.585415	-1.10725	-0.953609	-1.40452	-1.68419	-1.73871	-1.0233	-1.84499	-1.95222	-1.28112	1.59449	0.113874	0.0449972	-0.046348	-0.028105	0.0923896	0.127202	0.164242	0.0435378	0.0721752	1.12023	0.523587	0.34115	0.0875982	0.152541	2.57723	-0.703712	-0.511248	-0.833188	-0.861064
31	-0.335508	-0.586644	0.10663	0.118467	-1.14971	-1.06429	0.0119331	-0.638157	-1.61249	-1.58976	0.164866	-1.13115	-0.92897	-0.951511	0.0212128	-0.0168772	0.0877627	0.572306	0.603953	0.102068	0.187546	0.825584	0.387883	0.209056	0.342785	1.49575	0.977694	0.866658	1.20409	1.71883	-1.0859	-1.05349	-1.39098	-1.22873	-0.948518	-1.07523	-0.729917	-0.696958	-0.0936676	0.937365	0.221887	0.131305	0.122083	0.669453	2.73446	-0.823506	-0.716134	-0.978656	-0.741432
32	0.314054	0.511053	0.940395	1.06773	1.04271	1.37409	1.29838	1.51915	1.07018	0.794069	1.04336	0.881751	0.582095	1.42285	1.81251	-1.43116	-1.39424	-1.01033	-0.999669	-1.18541	-0.923182	-0.925811	-0.693083	-1.11306	-1.15766	-0.956093	-1.18378	-1.54169	-0.809251	-0.349964	0.2238	0.104772	0.170744	0.243209	0.759598	0.598956	1.13938	0.895496	0.558342	1.10856	1.27396	0.93395	0.937719	0.607996	1.31151	-0.982175	-1.12712	-1.05198	-1.166
33	-0.669811	-0.638507	-0.929577	-1.06102	-0.34726	-0.584117	-0.829734	-0.589896	-0.71352	-0.742791	-0.655661	-0.495318	-0.725172	-0.689262	-1.14036	-1.38865	-0.348209	0.00179152	-0.395181	0.904521	0.749665	0.68263	0.992151	1.53733	1.12892	1.45903	1.9302	1.80032	1.39505	0.362444	-0.610877	-0.442665	-0.202356	-0.54605	-0.543175	-0.202154	-0.810235	-0.0691564	-0.0730721	-0.587233	-0.628204	-0.00651097	0.627667	0.609852	-1.2549	-0.624461	0.159383	0.103847	-0.424897
34	-1.52397	-1.40842	-1.29287	-1.17733	-1.06178	-0.946233	-0.830686	-0.715139	-0.599592	-0.484045	-0.368499	-0.252952	-0.137405	-0.00784715	0.135721	-1.46142	-0.660668	-0.258885	0.0115672	0.114611	0.404066	0.826149	1.17042	1.36969	1.56379	1.38159	1.45515	1.44274	1.71373	1.5985	-1.12798	-1.00296	-0.877944	-0.752926	-0.627908	-0.50289	-0.315363	-0.252854	-0.127836	-0.00281812	0.1222	0.284098	0.482877	0.681655	0.880434	0.00255305	-0.578318	-0.74486	-0.44189
35	-0.152556	0.209351	0.382467	0.643163	0.964517	1.16728	1.00473	1.02211	0.878641	0.356909	0.500717	0.604314	0.665995	1.04426	-0.367564	-1.34247	-0.98056	-0.807444	-0.546748	-0.225394	-0.0226303	-0.185182	-0.167802	-0.31127	-0.833002	-0.689194	-0.585597	-0.523916	-0.145651	-1.55748	0.141716	0.171863	0.169773	0.561782	0.709498	0.665333	1.04748	0.986825	0.731399	0.891316	1.23995	0.869779	1.08299	1.00416	-1.34954	-1.0482	-1.01805	-1.02014	-0.628129
36	0.14631	0.0670362	0.189277	0.132986	-0.0647811	-0.254222	-0.479552	-0.824625	-0.878251	-0.896904	-1.04904	-1.21666	-1.09367	-1.12631	-1.02797	-0.861334	-0.469579	-0.225444	0.0871722	0.440617	0.694731	0.6632	0.785731	0.795861	0.51022	0.744977	0.948292	1.11883	1.53691	1.6062	-1.8482	-1.21328	-1.59027	-1.22688	-0.468392	-0.261693	-0.29422	-0.115683	0.146807	0.110764	0.797126	0.863354	1.49628	0.287508	0.416961	-1.3006	-1.08883	-1.09244	-0.654381
37	1.08149	0.990336	0.359266	-0.0237087	0.360016	0.461063	0.121217	-0.342486	-0.285113	-0.586157	-0.622639	-0.542411	-0.574477	-1.6562	-2.6116	0.804702	0.784624	0.533107	0.365616	0.564358	0.616686	0.427958	0.143027	0.207677	0.0930261	0.0827585	0.129811	0.193327	-0.329415	-0.745863	-0.0598772	0.210187	0.195405	0.331559	-0.0644542	-0.0411579	-0.162986	-0.134923	0.0365999	-1.41141	-0.60794	-0.779638	-0.6866	-0.910709	-3.07612	-0.021608	0.215788	0.498083	1.1689
38	-1.00046	-1.14378	-1.13839	-0.851662	-0.640692	-0.937933	-0.75833	-0.721273	-0.525218	-0.00205636	0.0525529	0.158296	0.0559479	0.615661	0.353214	-1.95926	-0.96196	0.14934	0.128535	0.150182	0.889684	0.649871	0.539284	1.19249	0.204276	0.507664	1.1312	1.09739	1.1412	1.62422	-1.49986	-1.65864	-1.22413	-1.05717	-1.21873	-1.34279	-0.966023	-0.87266	-0.808599	-0.395653	-0.521458	-0.354109	-0.0369976	0.665674	0.377487	-0.568382	0.203456	-0.429689	-0.153376
39	-2.29401	-1.61742	-1.18048	-0.63237	-0.00725874	0.467316	0.47817	0.717424	0.752502	0.307421	0.70716	1.05586	1.35134	2.07503	2.25881	-1.56296	-1.04756	-0.240634	-0.522501	-0.828167	-0.379708	-0.427306	-0.542581	0.179564	-0.166262	-0.0435496	0.402678	0.310458	-0.0331376	0.462176	-0.640172	-0.329409	-0.506193	-0.766531	-0.0629753	0.297748	-0.0122196	0.0527158	0.669271	0.783637	1.03152	1.40975	1.41614	0.994429	1.93543	-0.96941	-0.317917	-0.871091	-1.02316
40	0	0	0	0	0	0	0	0	0	0	0	0	0	0	0	0	0	0	0	0	0	0	0	0	0	0	0	0	0	0	0	0	0	0	0	0	0	0	0	0	0	0	0	0	0	0	0	0	0
41	-1.99834	-1.07054	-0.104015	-0.227676	-0.206167	0.605478	0.502985	0.692233	1.7443	1.36751	1.49976	2.02164	1.6847	1.36248	1.74283	0.311181	0.234791	0.0820117	-0.0707678	-0.299937	-0.529106	-0.681886	-1.06383	-1.14022	-1.44578	-1.44578	-1.36939	-1.52217	-1.52217	0.845909	0.581072	0.790319	0.147351	-0.19886	0.215966	0.311906	0.0222196	0.246332	0.489844	0.254954	0.511681	0.766764	0.64308	0.267309	0.227241	-0.475309	-0.150652	-0.437114	-0.494406
42	0.509316	0.964746	1.07548	1.34612	1.72751	1.89238	1.39025	1.21665	0.749364	-0.40855	-0.351323	-0.367515	-0.460236	0.000160771	-0.37879	-1.15933	-1.0053	-0.386417	-0.374974	-0.451125	-0.281911	-0.393404	-0.428542	-0.849692	-1.20467	-0.684292	-0.878696	-1.11246	-0.260997	0.566253	-0.0484353	0.0548755	0.158186	0.261497	0.364808	0.468119	0.623085	0.67474	0.778051	0.881362	0.984673	1.11846	1.28272	1.44699	1.61125	-1.68878	-1.3886	-1.83821	-1.60557
43	-0.511452	-0.79454	-0.414618	-0.467382	-0.466934	0.350873	0.104863	0.152509	0.781504	0.20179	0.388992	0.931474	0.777162	-0.0687396	-0.090382	0.375177	-0.144204	-0.249752	-0.0717779	-0.132556	0.193444	0.0951388	0.312545	0.355066	-0.0686045	-0.0852668	0.0265546	0.10306	-0.505251	-1.07869	-0.292945	0.234353	-0.154041	-0.3312	0.360251	0.505541	-0.279207	0.117702	0.386552	-1.13399	-0.133223	0.385404	0.287694	-0.0931238	-2.13922	1.6221	0.970918	1.71927	1.06244
44	0.248255	0.248255	0.248255	0.248255	0.248255	0.248255	0.248255	0.248255	0.248255	0.248255	0.248255	0.248255	0.248255	0.248255	0.248255	0.765949	0.357551	0.342679	0.191974	0.121325	-0.311832	-0.760409	-0.863912	-0.490913	-0.62433	-0.492625	-0.698238	-0.637517	-0.423775	-0.199745	0.542637	-0.0429081	0.446015	0.582687	-0.206774	-0.437561	0.233232	0.00285708	-0.342777	0.185428	-0.000362553	-0.525961	-0.331681	0.377434	4.44711	-0.25982	-0.472796	-0.385101	-0.21977
45	0.025022	0.025022	0.025022	0.025022	0.025022	0.025022	0.025022	0.025022	0.025022	0.025022	0.025022	0.025022	0.025022	0.025022	0.025022	-0.025022	-0.025022	-0.025022	-0.025022	-0.025022	-0.025022	-0.025022	-0.025022	-0.025022	-0.025022	-0.025022	-0.025022	-0.025022	-0.025022	-0.025022	0.224436	0.25312	0.218127	0.326561	0.351617	0.352736	0.38866	0.354336	0.374244	0.305279	0.475674	0.467868	0.385769	0.256415	-4.73484	0.224436	0.25312	0.218127	0.326561
46	-1.98798	-1.86551	-1.74304	-1.62057	-1.49811	-1.37564	-1.25317	-1.1307	-1.00823	-0.885766	-0.763298	-0.64083	-0.518363	-0.381045	-0.228877	0.485594	0.440377	0.250871	0.794422	0.856823	0.733289	0.956381	1.23972	0.618058	1.66485	1.66678	1.37018	1.62089	2.26964	1.93324	0.757566	0.701141	0.644717	0.588293	0.531868	0.475444	0.390807	0.362595	0.306171	0.249746	0.193322	0.120252	0.0305374	-0.0591774	-0.148892	0.185966	0.0872233	-0.0115194	-0.110262
47	-0.726672	-1.18365	-1.62952	-1.61364	-1.52209	-1.07199	-0.666076	-0.794676	-1.17836	-1.00345	-1.18656	-1.33527	-1.0442	-0.949209	-1.08098	1.88469	0.966818	-0.772509	1.22923	0.583955	1.46768	0.641294	1.97623	0.911287	2.45882	0.660688	0.667558	1.22098	2.32549	0.764149	-0.0485737	-0.216788	-0.543755	-0.180005	-0.108626	-0.232757	0.0960351	-0.210196	-0.0166163	-0.0503345	0.103089	0.237012	-0.141955	0.213206	-0.0128912	0.0998471	-0.0683676	-0.395334	-0.0315845
48	0.274762	0.216925	-0.551339	-0.526259	-0.246285	0.240469	-0.191519	-0.0226136	0.591076	0.0183332	-0.529842	0.460047	0.391461	-0.4372	-0.769892	1.92467	1.4447	-0.331051	-0.276831	0.744325	0.320579	0.220799	0.259292	-0.118726	-0.0798072	-0.463724	0.0366826	-0.0459196	-0.763584	-1.78952	1.96427	1.76121	1.55816	1.3551	1.15204	0.948989	0.644404	0.542876	0.33982	0.136764	-0.0662925	-0.32925	-0.65211	-0.974969	-1.29783	1.43125	1.0759	0.72055	0.365202
49	0.963755	0.963755	0.963755	0.963755	0.963755	0.963755	0.963755	0.963755	0.963755	0.963755	0.963755	0.963755	0.963755	0.963755	0.963755	-0.963755	-0.963755	-0.963755	-0.963755	-0.963755	-0.963755	-0.963755	-0.963755	-0.963755	-0.963755	-0.963755	-0.963755	-0.963755	-0.963755	-0.963755	0.189872	0.00885802	0.455964	0.0820635	0.308874	0.121889	0.0322622	0.137709	-0.0700185	-0.238847	-0.275287	-0.0912122	0.0465478	-0.363878	-0.344795	0.189872	0.00885802	0.455964	0.0820635
50	-1.18116	-1.7464	0.521276	-0.156665	-0.513936	0.0474162	0.123208	0.14152	1.11485	0.433791	1.45241	0.956452	1.19149	0.637125	1.73932	-0.31738	-0.31738	-0.31738	-0.31738	-0.31738	-0.31738	-0.31738	-0.31738	-0.31738	-0.31738	-0.31738	-0.31738	-0.31738	-0.31738	-0.31738	0.339213	0.339213	0.339213	0.339213	0.339213	0.339213	0.339213	0.339213	0.339213	0.339213	0.339213	0.339213	0.339213	0.339213	0.339213	0.318435	0.65946	0.302308	0.338402
51	1.9566	1.235	1.03872	0.696408	0.0263555	-0.609856	-0.510936	-1.11148	-1.64643	-1.6342	-1.63576	-1.7201	-1.26273	-1.35071	-1.06228	1.32272	1.23086	1.37251	1.30728	1.07811	0.858596	0.597491	0.197631	0.13549	0.113876	-0.0624133	-0.25665	-0.114133	-0.151957	-0.038001	0.095818	-0.115814	0.179864	-0.434957	-0.586715	-0.655136	-0.848664	-0.69281	-0.748183	-0.412049	-1.43855	-1.46667	-0.90778	-0.0273688	-0.516829	0.737324	0.709354	0.0407337	0.083355
52	0.590016	-0.026636	-0.321607	-0.765805	-1.31336	-1.65885	-1.38188	-1.41149	-1.16704	-0.278058	-0.523093	-0.699611	-0.804709	-1.44923	-1.33368	2.33303	2.84642	2.55332	1.74309	1.20797	0.547396	0.542563	0.337828	0.581189	0.24805	-0.193101	-0.327948	-0.507475	-0.540737	1.17343	0.110543	0.110543	0.110543	0.110543	0.110543	0.110543	0.110543	0.110543	0.110543	0.110543	0.110543	0.110543	0.110543	0.110543	0.110543	0.262226	0.707914	0.574098	0.253965
53	0	0	0	0	0	0	0	0	0	0	0	0	0	0	0	0	0	0	0	0	0	0	0	0	0	0	0	0	0	0	0.600085	-0.125529	0.925597	1.19744	0.925403	-0.938207	1.52802	0.0555493	0.230197	-1.39159	0.947754	1.60547	-1.72405	1.82547	-1.14846	-0.300878	-0.300878	-0.300878	-0.300878
[truncated: 11 more columns]

## Sheet: E
Supplementary file 1E: enrichment of gene annotation terms for the 53 clusters in the two-season analysis of our data with a p-value (hypergeometric test) cut-off of 0.01
GO term	Pvalue (hypergeometric test)	OddsRatio	ExpCount	Count	Size	Term	cluster	GO type
GO:0009507	2.03264e-42	4.30312	64.603	180	1285	chloroplast	1	CC
GO:0044434	3.30971e-37	4.91193	37.0525	126	737	chloroplast part	1	CC
GO:0044435	1.41468e-36	4.82718	37.5552	126	747	plastid part	1	CC
GO:0009536	1.54887e-33	3.14737	134.384	257	2673	plastid	1	CC
GO:0009579	2.0885e-24	5.5177	16.6409	68	331	thylakoid	1	CC
GO:0031984	6.68181e-22	5.6293	14.0266	59	279	organelle subcompartment	1	CC
GO:0031976	6.71355e-22	5.73439	13.5742	58	270	plastid thylakoid	1	CC
GO:0009534	6.71355e-22	5.73439	13.5742	58	270	chloroplast thylakoid	1	CC
GO:0015979	3.42223e-18	5.60037	11.2731	48	230	photosynthesis	1	BP
GO:0009526	3.75196e-17	4.22862	17.8978	60	356	plastid envelope	1	CC
GO:0031967	4.80341e-17	3.54146	26.3942	75	525	organelle envelope	1	CC
GO:0031975	5.35516e-17	3.53321	26.4445	75	526	envelope	1	CC
GO:0044436	4.89193e-16	4.82326	12.6692	48	252	thylakoid part	1	CC
GO:0019684	3.3472e-15	6.36807	7.30298	35	149	photosynthesis, light reaction	1	BP
GO:0009941	4.33651e-15	3.95128	17.5459	56	349	chloroplast envelope	1	CC
GO:0034357	5.68036e-15	4.75277	11.9654	45	238	photosynthetic membrane	1	CC
GO:0051186	6.86009e-15	3.75222	19.4093	59	396	cofactor metabolic process	1	BP
GO:0072524	1.67667e-14	6.94083	6.02864	31	123	pyridine-containing compound metabolic process	1	BP
GO:0006740	2.35629e-14	7.86257	4.95034	28	101	NADPH regeneration	1	BP
GO:0006098	2.35629e-14	7.86257	4.95034	28	101	pentose-phosphate shunt	1	BP
GO:0019320	6.6015e-14	5.1653	9.36154	38	191	hexose catabolic process	1	BP
GO:0006007	6.6015e-14	5.1653	9.36154	38	191	glucose catabolic process	1	BP
GO:0006733	7.87521e-14	6.22313	6.76384	32	138	oxidoreduction coenzyme metabolic process	1	BP
GO:0006732	8.27749e-14	4.35383	12.8415	45	262	coenzyme metabolic process	1	BP
GO:0006739	8.99941e-14	7.35437	5.19541	28	106	NADP metabolic process	1	BP
GO:0046496	9.30625e-14	7.00049	5.58752	29	114	nicotinamide nucleotide metabolic process	1	BP
GO:0019362	1.18884e-13	6.91831	5.63653	29	115	pyridine nucleotide metabolic process	1	BP
GO:0008299	1.44932e-13	4.76437	10.5379	40	215	isoprenoid biosynthetic process	1	BP
GO:0046164	1.99146e-13	4.70945	10.6359	40	217	alcohol catabolic process	1	BP
GO:0009532	3.01244e-13	3.46615	19.9088	57	396	plastid stroma	1	CC
GO:0046365	3.05179e-13	4.8733	9.80266	38	200	monosaccharide catabolic process	1	BP
GO:0009570	3.55416e-13	3.49362	19.406	56	386	chloroplast stroma	1	CC
GO:0006720	5.70012e-13	4.42948	11.4691	41	234	isoprenoid metabolic process	1	BP
GO:0042440	6.04875e-13	5.31897	8.13621	34	166	pigment metabolic process	1	BP
GO:0042651	8.77923e-13	4.46012	11.1107	40	221	thylakoid membrane	1	CC
GO:0009535	1.13364e-12	4.63543	10.2058	38	203	chloroplast thylakoid membrane	1	CC
GO:0006006	1.28319e-12	4.61204	10.2438	38	209	glucose metabolic process	1	BP
GO:0055035	1.32934e-12	4.60699	10.256	38	204	plastid thylakoid membrane	1	CC
GO:0006091	1.6659e-12	3.57483	17.2527	51	352	generation of precursor metabolites and energy	1	BP
GO:0019748	4.36949e-12	3.8794	13.7727	44	281	secondary metabolic process	1	BP
GO:0009668	7.23745e-12	6.46285	5.29344	26	108	plastid membrane organization	1	BP
GO:0010027	7.23745e-12	6.46285	5.29344	26	108	thylakoid membrane organization	1	BP
GO:0006818	1.52377e-11	6.5208	5.04837	25	103	hydrogen transport	1	BP
GO:0009056	2.68927e-11	2.3044	52.5913	101	1073	catabolic process	1	BP
GO:0044275	2.76514e-11	4.00226	11.8122	39	241	cellular carbohydrate catabolic process	1	BP
GO:0044446	3.14531e-11	1.97233	103.013	164	2049	intracellular organelle part	1	CC
GO:0009657	3.28966e-11	4.15723	10.8319	37	221	plastid organization	1	BP
GO:0044422	4.01651e-11	1.96445	103.315	164	2055	organelle part	1	CC
GO:0019318	5.15036e-11	3.99137	11.5181	38	235	hexose metabolic process	1	BP
GO:0015992	7.93361e-11	6.24551	4.99936	24	102	proton transport	1	BP
GO:0019637	1.27846e-10	2.38578	42.1514	85	860	organophosphate metabolic process	1	BP
GO:0006066	1.40904e-10	2.33563	45.1412	89	921	alcohol metabolic process	1	BP
GO:0016044	1.49419e-10	4.09555	10.3418	35	211	cellular membrane organization	1	BP
GO:0061024	1.49419e-10	4.09555	10.3418	35	211	membrane organization	1	BP
GO:0006081	1.50594e-10	4.43574	8.82239	32	180	cellular aldehyde metabolic process	1	BP
GO:0016052	1.79957e-10	3.71916	12.5474	39	256	carbohydrate catabolic process	1	BP
GO:0009767	2.17688e-10	10.6872	2.25461	16	46	photosynthetic electron transport chain	1	BP
GO:0055114	2.30969e-10	2.17922	56.8554	104	1160	oxidation-reduction process	1	BP
GO:0016117	3.55116e-10	8.41405	2.98981	18	61	carotenoid biosynthetic process	1	BP
GO:0016109	3.55116e-10	8.41405	2.98981	18	61	tetraterpenoid biosynthetic process	1	BP
GO:0016114	4.93114e-10	5.89523	4.99936	23	102	terpenoid biosynthetic process	1	BP
GO:0015994	6.06477e-10	5.82088	5.04837	23	103	chlorophyll metabolic process	1	BP
GO:0090407	6.18859e-10	2.92383	20.8307	52	425	organophosphate biosynthetic process	1	BP
GO:0016116	8.49972e-10	7.86263	3.13685	18	64	carotenoid metabolic process	1	BP
GO:0016108	8.49972e-10	7.86263	3.13685	18	64	tetraterpenoid metabolic process	1	BP
GO:0006090	1.0234e-09	3.85727	10.5379	34	215	pyruvate metabolic process	1	BP
GO:0006721	1.07508e-09	5.12533	6.07765	25	124	terpenoid metabolic process	1	BP
GO:0046148	1.1883e-09	4.89246	6.56778	26	134	pigment biosynthetic process	1	BP
GO:0006778	1.93508e-09	5.17301	5.78357	24	118	porphyrin metabolic process	1	BP
GO:0033013	2.31546e-09	5.11798	5.83258	24	119	tetrapyrrole metabolic process	1	BP
GO:0019288	2.55917e-09	4.87614	6.32272	25	129	isopentenyl diphosphate biosynthetic process, mevalonate-independent pathway	1	BP
GO:0019682	2.55917e-09	4.87614	6.32272	25	129	glyceraldehyde-3-phosphate metabolic process	1	BP
GO:0006082	3.09626e-09	2.18922	46.4156	87	947	organic acid metabolic process	1	BP
GO:0008610	3.3102e-09	2.70843	23.1343	54	472	lipid biosynthetic process	1	BP
GO:0046490	4.21065e-09	4.7378	6.46976	25	132	isopentenyl diphosphate metabolic process	1	BP
GO:0009240	4.21065e-09	4.7378	6.46976	25	132	isopentenyl diphosphate biosynthetic process	1	BP
GO:0043436	6.1726e-09	2.161	46.3176	86	945	oxoacid metabolic process	1	BP
GO:0006644	7.33976e-09	3.45271	11.9102	35	243	phospholipid metabolic process	1	BP
GO:0042180	1.37921e-08	2.11725	47.1018	86	961	cellular ketone metabolic process	1	BP
GO:0015672	1.66748e-08	3.9537	8.43029	28	172	monovalent inorganic cation transport	1	BP
GO:0010207	2.13276e-08	6.12115	3.77402	18	77	photosystem II assembly	1	BP
GO:0044255	2.21295e-08	2.41611	28.5257	60	582	cellular lipid metabolic process	1	BP
GO:0044262	2.6614e-08	2.01445	54.7479	95	1117	cellular carbohydrate metabolic process	1	BP
GO:0022900	2.67847e-08	4.59958	6.07765	23	124	electron transport chain	1	BP
GO:0015078	2.93154e-08	6.90738	3.02847	16	65	hydrogen ion transmembrane transporter activity	1	MF
GO:0016138	3.713e-08	6.80851	3.08784	16	63	glycoside biosynthetic process	1	BP
GO:0016137	4.20719e-08	5.4515	4.36218	19	89	glycoside metabolic process	1	BP
GO:0008654	4.4534e-08	3.55169	9.90069	30	202	phospholipid biosynthetic process	1	BP
GO:0032787	4.94153e-08	2.4294	26.3692	56	538	monocarboxylic acid metabolic process	1	BP
GO:0019761	7.53988e-08	8.6247	2.10757	13	43	glucosinolate biosynthetic process	1	BP
GO:0019758	7.53988e-08	8.6247	2.10757	13	43	glycosinolate biosynthetic process	1	BP
GO:0016144	7.53988e-08	8.6247	2.10757	13	43	S-glycoside biosynthetic process	1	BP
GO:0019252	9.0157e-08	5.46759	4.11712	18	84	starch biosynthetic process	1	BP
GO:0019752	9.04212e-08	2.05589	45.1903	81	922	carboxylic acid metabolic process	1	BP
GO:0044282	1.05545e-07	2.22102	33.3781	65	681	small molecule catabolic process	1	BP
GO:0005996	1.1087e-07	2.14271	37.8383	71	772	monosaccharide metabolic process	1	BP
GO:0051188	1.54736e-07	3.18145	11.6162	32	237	cofactor biosynthetic process	1	BP
GO:0019760	1.5654e-07	7.15356	2.5977	14	53	glucosinolate metabolic process	1	BP
GO:0019757	1.5654e-07	7.15356	2.5977	14	53	glycosinolate metabolic process	1	BP
GO:0016143	1.5654e-07	7.15356	2.5977	14	53	S-glycoside metabolic process	1	BP
GO:0044272	1.87342e-07	3.46359	9.41055	28	192	sulfur compound biosynthetic process	1	BP
GO:0006790	2.07592e-07	3.13448	11.7632	32	240	sulfur compound metabolic process	1	BP
GO:0006812	6.84039e-07	2.62809	16.8116	39	343	cation transport	1	BP
GO:0006629	9.2035e-07	2.05848	36.1718	66	738	lipid metabolic process	1	BP
GO:0015995	1.07733e-06	5.43727	3.43093	15	70	chlorophyll biosynthetic process	1	BP
GO:0005982	1.20401e-06	4.44748	4.85232	18	99	starch metabolic process	1	BP
GO:0051540	1.48874e-06	4.6062	4.42622	17	95	metal cluster binding	1	MF
GO:0051536	1.48874e-06	4.6062	4.42622	17	95	iron-sulfur cluster binding	1	MF
GO:0009055	1.67823e-06	3.92927	5.96375	20	128	electron carrier activity	1	MF
GO:0005984	2.57336e-06	4.41057	4.60725	17	94	disaccharide metabolic process	1	BP
GO:0033014	3.44965e-06	4.55951	4.21514	16	86	tetrapyrrole biosynthetic process	1	BP
GO:0005737	3.45166e-06	1.73679	370.173	410	7363	cytoplasm	1	CC
GO:0044444	3.48202e-06	1.68851	356.448	398	7090	cytoplasmic part	1	CC
GO:0000023	4.06095e-06	5.61462	2.89178	13	59	maltose metabolic process	1	BP
GO:0009902	4.95646e-06	5.49454	2.9408	13	60	chloroplast relocation	1	BP
GO:0051667	4.95646e-06	5.49454	2.9408	13	60	establishment of plastid localization	1	BP
GO:0051644	4.95646e-06	5.49454	2.9408	13	60	plastid localization	1	BP
GO:0006461	6.8543e-06	2.60596	13.7727	32	281	protein complex assembly	1	BP
GO:0071822	6.99633e-06	2.52077	15.0961	34	308	protein complex subunit organization	1	BP
GO:0051656	7.28533e-06	5.26908	3.03882	13	62	establishment of organelle localization	1	BP
GO:0070271	8.56246e-06	2.57404	13.9198	32	284	protein complex biogenesis	1	BP
GO:0043623	8.70695e-06	2.77165	11.3711	28	232	cellular protein complex assembly	1	BP
GO:0009658	9.47202e-06	3.45262	6.66581	20	136	chloroplast organization	1	BP
GO:0006779	1.00935e-05	4.3913	4.0681	15	83	porphyrin biosynthetic process	1	BP
GO:0009773	1.14947e-05	9.85635	1.17632	8	24	photosynthetic electron transport in photosystem I	1	BP
GO:0033015	1.1575e-05	8.07681	1.51941	9	31	tetrapyrrole catabolic process	1	BP
GO:0006787	1.1575e-05	8.07681	1.51941	9	31	porphyrin catabolic process	1	BP
GO:0009069	1.21597e-05	3.85442	5.1464	17	105	serine family amino acid metabolic process	1	BP
GO:0009311	1.38403e-05	3.81067	5.19541	17	106	oligosaccharide metabolic process	1	BP
GO:0006544	1.54134e-05	7.72477	1.56843	9	32	glycine metabolic process	1	BP
GO:0006546	1.61855e-05	9.27551	1.22533	8	25	glycine catabolic process	1	BP
GO:0015077	1.69414e-05	3.73461	5.26487	17	113	monovalent inorganic cation transmembrane transporter activity	1	MF
GO:0016051	1.73679e-05	2.18221	21.3208	42	435	carbohydrate biosynthetic process	1	BP
GO:0009117	1.75096e-05	1.96934	30.9274	55	631	nucleotide metabolic process	1	BP
GO:0009108	1.78356e-05	3.72607	5.29344	17	108	coenzyme biosynthetic process	1	BP
GO:0006753	1.83232e-05	1.96569	30.9764	55	632	nucleoside phosphate metabolic process	1	BP
GO:0005975	1.84164e-05	1.67771	64.8936	97	1324	carbohydrate metabolic process	1	BP
GO:0009071	2.23859e-05	8.75922	1.27435	8	26	serine family amino acid catabolic process	1	BP
GO:0051187	2.27056e-05	5.06048	2.89178	12	59	cofactor catabolic process	1	BP
GO:0051640	2.47579e-05	4.60678	3.38192	13	69	organelle localization	1	BP
GO:0016469	3.23511e-05	6.91034	1.70934	9	34	proton-transporting two-sector ATPase complex	1	CC
GO:0003824	3.44679e-05	1.53835	256.348	295	5502	catalytic activity	1	MF
GO:0016820	3.65662e-05	4.396	3.49438	13	75	hydrolase activity, acting on acid anhydrides, catalyzing transmembrane movement of substances	1	MF
GO:0010264	4.08359e-05	7.88151	1.37237	8	28	myo-inositol hexakisphosphate biosynthetic process	1	BP
GO:0033517	4.08359e-05	7.88151	1.37237	8	28	myo-inositol hexakisphosphate metabolic process	1	BP
GO:0046173	4.08359e-05	7.88151	1.37237	8	28	polyol biosynthetic process	1	BP
GO:0006470	4.11328e-05	3.45717	5.63653	17	115	protein dephosphorylation	1	BP
GO:0034637	4.15453e-05	2.15481	19.9484	39	407	cellular carbohydrate biosynthetic process	1	BP
GO:0044248	5.3187e-05	1.79643	39.2597	64	801	cellular catabolic process	1	BP
GO:0019866	5.3556e-05	3.01175	7.49093	20	149	organelle inner membrane	1	CC
GO:0015996	5.40009e-05	7.50536	1.42139	8	29	chlorophyll catabolic process	1	BP
GO:0046149	5.40009e-05	7.50536	1.42139	8	29	pigment catabolic process	1	BP
GO:0032958	5.40009e-05	7.50536	1.42139	8	29	inositol phosphate biosynthetic process	1	BP
GO:0010218	5.49183e-05	6.34176	1.81349	9	37	response to far red light	1	BP
GO:0009521	5.81349e-05	4.53227	3.16731	12	63	photosystem	1	CC
GO:0051920	6.46725e-05	41.3108	0.279551	4	6	peroxiredoxin activity	1	MF
GO:0031977	7.45959e-05	5.33684	2.31264	10	46	thylakoid lumen	1	CC
GO:0016491	7.61929e-05	1.73386	44.6815	70	959	oxidoreductase activity	1	MF
GO:0016655	7.87635e-05	11.3093	0.79206	6	17	oxidoreductase activity, acting on NADH or NADPH, quinone or similar compound as acceptor	1	MF
GO:0019751	8.27562e-05	4.72953	2.79376	11	57	polyol metabolic process	1	BP
GO:0016651	8.78895e-05	5.8596	1.91026	9	41	oxidoreductase activity, acting on NADH or NADPH	1	MF
GO:0006811	8.93826e-05	1.97882	24.3596	44	497	ion transport	1	BP
GO:0006796	9.49493e-05	1.51027	99.399	133	2028	phosphate metabolic process	1	BP
GO:0015405	9.57523e-05	3.94678	3.82053	13	82	P-P-bond-hydrolysis-driven transmembrane transporter activity	1	MF
GO:0009637	9.76982e-05	4.62838	2.84277	11	58	response to blue light	1	BP
GO:0043647	0.000105875	5.72609	1.96053	9	40	inositol phosphate metabolic process	1	BP
GO:0042626	0.000107944	4.18378	3.35461	12	72	ATPase activity, coupled to transmembrane movement of substances	1	MF
GO:0015399	0.000108825	3.88994	3.86712	13	83	primary active transmembrane transporter activity	1	MF
GO:0006793	0.000137716	1.49419	100.183	133	2044	phosphorus metabolic process	1	BP
GO:0043492	0.000141708	4.04787	3.44779	12	74	ATPase activity, coupled to movement of substances	1	MF
GO:0008137	0.000145346	27.5373	0.326143	4	7	NADH dehydrogenase (ubiquinone) activity	1	MF
GO:0044106	0.00016304	1.96743	22.7422	41	464	cellular amine metabolic process	1	BP
GO:0065003	0.000174295	2.15759	16.2234	32	331	macromolecular complex assembly	1	BP
GO:0006766	0.000174584	3.9582	3.52896	12	72	vitamin metabolic process	1	BP
GO:0034621	0.000178915	2.18335	15.5372	31	317	cellular macromolecular complex subunit organization	1	BP
GO:0009072	0.00019562	3.11769	5.78357	16	118	aromatic amino acid family metabolic process	1	BP
GO:0009250	0.000207731	2.86754	7.0089	18	143	glucan biosynthetic process	1	BP
GO:0015991	0.000210744	9.06089	0.931253	6	19	ATP hydrolysis coupled proton transport	1	BP
GO:0015988	0.000210744	9.06089	0.931253	6	19	energy coupled proton transport, against electrochemical gradient	1	BP
GO:0046165	0.0002114	2.25896	13.5767	28	277	alcohol biosynthetic process	1	BP
GO:0051234	0.000215714	1.53637	73.4709	102	1499	establishment of localization	1	BP
GO:0005215	0.000217988	1.85405	27.6755	47	594	transporter activity	1	MF
GO:0016671	0.000218917	8.88274	0.931836	6	20	oxidoreductase activity, acting on a sulfur group of donors, disulfide as acceptor	1	MF
GO:0033178	0.000242311	8.81548	0.955219	6	19	proton-transporting two-sector ATPase complex, catalytic domain	1	CC
GO:0006754	0.000244806	6.881	1.32336	7	27	ATP biosynthetic process	1	BP
GO:0022890	0.000252823	2.72301	7.73424	19	166	inorganic cation transmembrane transporter activity	1	MF
GO:0009310	0.000259798	3.76843	3.676	12	75	amine catabolic process	1	BP
GO:0051179	0.000264606	1.52079	75.6275	104	1543	localization	1	BP
GO:0009308	0.000267388	1.88527	24.8007	43	506	amine metabolic process	1	BP
GO:0006364	0.000276501	2.70406	7.79311	19	159	rRNA processing	1	BP
GO:0050136	0.000280004	20.6506	0.372734	4	8	NADH dehydrogenase (quinone) activity	1	MF
GO:0003954	0.000280004	20.6506	0.372734	4	8	NADH dehydrogenase activity	1	MF
GO:0010155	0.000312796	6.55259	1.37237	7	28	regulation of proton transport	1	BP
GO:0034622	0.000331045	2.15743	14.655	29	299	cellular macromolecular complex assembly	1	BP
GO:0009070	0.000334399	3.65165	3.77402	12	77	serine family amino acid biosynthetic process	1	BP
GO:0003913	0.000387862	61.8245	0.186367	3	4	DNA photolyase activity	1	MF
GO:0006636	0.00039514	6.25404	1.42139	7	29	unsaturated fatty acid biosynthetic process	1	BP
GO:0033559	0.00039514	6.25404	1.42139	7	29	unsaturated fatty acid metabolic process	1	BP
GO:0005746	0.000396681	4.66301	2.31264	9	46	mitochondrial respiratory chain	1	CC
GO:0009523	0.000469183	4.53981	2.36291	9	47	photosystem II	1	CC
GO:0019344	0.000481153	3.7459	3.38192	11	69	cysteine biosynthetic process	1	BP
GO:0010114	0.000502555	5.07853	1.91152	8	39	response to red light	1	BP
GO:0006520	0.000508895	1.89491	21.7129	38	443	cellular amino acid metabolic process	1	BP
GO:0042625	0.000511128	5.03782	1.91026	8	41	ATPase activity, coupled to transmembrane movement of ions	1	MF
GO:0016072	0.000557242	2.53811	8.23423	19	168	rRNA metabolic process	1	BP
GO:0009145	0.000611457	5.73157	1.51941	7	31	purine nucleoside triphosphate biosynthetic process	1	BP
GO:0009206	0.000611457	5.73157	1.51941	7	31	purine ribonucleoside triphosphate biosynthetic process	1	BP
GO:0006534	0.000618477	3.62022	3.47994	11	71	cysteine metabolic process	1	BP
GO:0043648	0.000635093	3.01428	5.19541	14	106	dicarboxylic acid metabolic process	1	BP
GO:0009309	0.000719538	2.10361	13.9198	27	284	amine biosynthetic process	1	BP
GO:0009628	0.00073107	1.60892	43.0827	64	879	response to abiotic stimulus	1	BP
GO:0009063	0.000786999	3.50264	3.57797	11	73	cellular amino acid catabolic process	1	BP
GO:0008652	0.000875238	2.10526	13.3806	26	273	cellular amino acid biosynthetic process	1	BP
GO:0043094	0.000884576	3.44665	3.62698	11	74	cellular metabolic compound salvage	1	BP
GO:0046184	0.000944319	13.0405	0.490133	4	10	aldehyde biosynthetic process	1	BP
GO:0019253	0.000944319	13.0405	0.490133	4	10	reductive pentose-phosphate cycle	1	BP
GO:0019685	0.000944319	13.0405	0.490133	4	10	photosynthesis, dark reaction	1	BP
GO:0051537	0.000980063	5.18568	1.63071	7	35	2 iron, 2 sulfur cluster binding	1	MF
GO:0009058	0.00102055	1.37306	136.6	167	2787	biosynthetic process	1	BP
GO:0034660	0.00104121	2.04617	14.2629	27	291	ncRNA metabolic process	1	BP
GO:0044455	0.00109112	3.35172	3.72033	11	74	mitochondrial membrane part	1	CC
GO:0034220	0.00112208	2.17407	11.4691	23	234	ion transmembrane transport	1	BP
GO:0016791	0.00127011	2.34818	8.80585	19	189	phosphatase activity	1	MF
GO:0072330	0.00130321	2.28649	9.50858	20	194	monocarboxylic acid biosynthetic process	1	BP
GO:0022607	0.00140197	1.82723	20.5856	35	420	cellular component assembly	1	BP
GO:0016311	0.0014086	2.13263	11.6652	23	238	dephosphorylation	1	BP
GO:0005747	0.001523	5.72568	1.30714	6	26	mitochondrial respiratory chain complex I	1	CC
GO:0000096	0.00156885	2.60568	6.32272	15	129	sulfur amino acid metabolic process	1	BP
GO:0033176	0.00156903	10.8762	0.553022	4	11	proton-transporting V-type ATPase complex	1	CC
GO:0034470	0.00165052	2.18786	10.3908	21	212	ncRNA processing	1	BP
GO:0005743	0.00167529	2.69359	5.73132	14	114	mitochondrial inner membrane	1	CC
GO:0046961	0.00170553	10.3205	0.559102	4	12	proton-transporting ATPase activity, rotational mechanism	1	MF
GO:0042170	0.00172942	2.80777	5.12802	13	102	plastid membrane	1	CC
GO:0006073	0.00178371	2.27374	9.06746	19	185	cellular glucan metabolic process	1	BP
GO:0016730	0.00180749	20.6034	0.279551	3	6	oxidoreductase activity, acting on iron-sulfur proteins as donors	1	MF
GO:0015075	0.00180884	1.98905	14.0707	26	302	ion transmembrane transporter activity	1	MF
GO:0009853	0.0018217	4.03312	2.30363	8	47	photorespiration	1	BP
GO:0009073	0.00182838	3.33978	3.38192	10	69	aromatic amino acid family biosynthetic process	1	BP
GO:0046417	0.00182838	3.33978	3.38192	10	69	chorismate metabolic process	1	BP
GO:0031978	0.00187628	5.45243	1.35742	6	27	plastid thylakoid lumen	1	CC
GO:0045271	0.00187628	5.45243	1.35742	6	27	respiratory chain complex I	1	CC
GO:0030964	0.00187628	5.45243	1.35742	6	27	NADH dehydrogenase complex	1	CC
GO:0009543	0.00187628	5.45243	1.35742	6	27	chloroplast thylakoid lumen	1	CC
GO:0009152	0.00188514	3.61525	2.84277	9	58	purine ribonucleotide biosynthetic process	1	BP
GO:0070469	0.00198375	3.59007	2.86566	9	57	respiratory chain	1	CC
GO:0018298	0.00201007	5.34872	1.37237	6	28	protein-chromophore linkage	1	BP
GO:0009636	0.00205793	9.77815	0.58816	4	12	response to toxin	1	BP
GO:0042578	0.00205887	2.14334	10.5763	21	227	phosphoric ester hydrolase activity	1	MF
GO:0051741	0.00216586	Inf	0.0931836	2	2	2-methyl-6-phytyl-1,4-benzoquinone methyltransferase activity	1	MF
GO:0010363	0.0021815	4.43384	1.86251	7	38	regulation of plant-type hypersensitive response	1	BP
GO:0009201	0.0021815	4.43384	1.86251	7	38	ribonucleoside triphosphate biosynthetic process	1	BP
GO:0019829	0.00222313	4.3974	1.86367	7	40	cation-transporting ATPase activity	1	MF
GO:0000097	0.0023175	2.70356	5.29344	13	108	sulfur amino acid biosynthetic process	1	BP
GO:0010731	0.0023973	Inf	0.0980266	2	2	protein glutathionylation	1	BP
GO:0043181	0.0023973	Inf	0.0980266	2	2	vacuolar sequestering	1	BP
GO:0009142	0.00254877	4.29479	1.91152	7	39	nucleoside triphosphate biosynthetic process	1	BP
GO:0044042	0.00257399	2.19291	9.36154	19	191	glucan metabolic process	1	BP
GO:0016168	0.00292247	6.07914	1.02502	5	22	chlorophyll binding	1	MF
GO:0015985	0.00293022	6.11933	1.02928	5	21	energy coupled proton transport, down electrochemical gradient	1	BP
GO:0015986	0.00293022	6.11933	1.02928	5	21	ATP synthesis coupled proton transport	1	BP
GO:0044429	0.00304229	2.15663	9.50192	19	189	mitochondrial part	1	CC
GO:0022857	0.00304494	1.73475	21.572	35	463	transmembrane transporter activity	1	MF
GO:0031966	0.00315127	2.40479	6.78708	15	135	mitochondrial membrane	1	CC
GO:0006096	0.00334849	2.85287	4.26416	11	87	glycolysis	1	BP
GO:0043269	0.00337584	3.27865	3.08784	9	63	regulation of ion transport	1	BP
GO:0046129	0.00352035	3.57279	2.54869	8	52	purine ribonucleoside biosynthetic process	1	BP
GO:0042451	0.00352035	3.57279	2.54869	8	52	purine nucleoside biosynthetic process	1	BP
GO:0071844	0.00367247	1.80975	17.1056	29	349	cellular component assembly at cellular level	1	BP
GO:0016765	0.00368662	3.5314	2.56255	8	55	transferase activity, transferring alkyl or aryl (other than methyl) groups	1	MF
GO:0032879	0.00378391	2.98319	3.72501	10	76	regulation of localization	1	BP
GO:0042254	0.00384826	2.10546	9.70463	19	198	ribosome biogenesis	1	BP
GO:0035966	0.00397299	3.493	2.5977	8	53	response to topologically incorrect protein	1	BP
GO:0022891	0.00412962	1.77508	18.031	30	387	substrate-specific transmembrane transporter activity	1	MF
GO:0016861	0.00420782	7.50318	0.698877	4	15	intramolecular oxidoreductase activity, interconverting aldoses and ketoses	1	MF
GO:0008324	0.00422048	2.08478	9.78428	19	210	cation transmembrane transporter activity	1	MF
GO:0031969	0.00424701	2.61599	5.02747	12	100	chloroplast membrane	1	CC
GO:0006810	0.00429091	1.39373	71.0693	92	1450	transport	1	BP
GO:0048037	0.0043422	1.85018	15.0026	26	322	cofactor binding	1	MF
GO:0044237	0.00445398	1.30578	275.014	302	5611	cellular metabolic process	1	BP
GO:0045156	0.00471855	12.3591	0.372734	3	8	electron transporter, transferring electrons within the cyclic electron transport pathway of photosynthesis activity	1	MF
GO:0000165	0.00480356	4.35575	1.61744	6	33	MAPKKK cascade	1	BP
GO:0007243	0.00480356	4.35575	1.61744	6	33	intracellular protein kinase cascade	1	BP
GO:0046395	0.00482978	2.36345	6.42074	14	131	carboxylic acid catabolic process	1	BP
GO:0016054	0.00482978	2.36345	6.42074	14	131	organic acid catabolic process	1	BP
GO:0016829	0.005028	2.09327	9.22518	18	198	lyase activity	1	MF
GO:0044249	0.00503925	1.30897	130.915	156	2671	cellular biosynthetic process	1	BP
GO:0030091	0.00504745	7.10897	0.735199	4	15	protein repair	1	BP
GO:0042793	0.00514417	3.71231	2.15659	7	44	transcription from plastid promoter	1	BP
GO:0071842	0.00515801	1.47085	44.9452	62	917	cellular component organization at cellular level	1	BP
GO:0006979	0.00531957	1.92496	12.2043	22	249	response to oxidative stress	1	BP
GO:0009706	0.00543874	4.238	1.65906	6	33	chloroplast inner membrane	1	CC
GO:0042822	0.00544514	11.7119	0.392106	3	8	pyridoxal phosphate metabolic process	1	BP
GO:0042823	0.00544514	11.7119	0.392106	3	8	pyridoxal phosphate biosynthetic process	1	BP
GO:0016667	0.00545911	2.80843	3.91371	10	84	oxidoreductase activity, acting on a sulfur group of donors	1	MF
GO:0022892	0.00573083	1.71339	19.2424	31	413	substrate-specific transporter activity	1	MF
GO:0080135	0.00584116	3.61421	2.2056	7	45	regulation of cellular response to stress	1	BP
GO:0006164	0.00624296	2.94877	3.38192	9	69	purine nucleotide biosynthetic process	1	BP
GO:0051049	0.00624296	2.94877	3.38192	9	69	regulation of transport	1	BP
GO:0046394	0.00626679	1.63382	23.3793	36	477	carboxylic acid biosynthetic process	1	BP
GO:0016053	0.00626679	1.63382	23.3793	36	477	organic acid biosynthetic process	1	BP
GO:0004807	0.00629666	41.1175	0.139775	2	3	triose-phosphate isomerase activity	1	MF
GO:0002020	0.00629666	41.1175	0.139775	2	3	protease binding	1	MF
GO:0004791	0.00629666	41.1175	0.139775	2	3	thioredoxin-disulfide reductase activity	1	MF
GO:0055085	0.00631892	1.58204	27.4965	41	561	transmembrane transport	1	BP
GO:0009528	0.00633014	4.08619	1.70934	6	34	plastid inner membrane	1	CC
GO:0080129	0.00650974	4.89325	1.22533	5	25	proteasome core complex assembly	1	BP
GO:0005740	0.00656877	2.20018	7.34011	15	146	mitochondrial envelope	1	CC
GO:0004721	0.00667323	2.44891	5.31146	12	114	phosphoprotein phosphatase activity	1	MF
GO:0016020	0.00693836	1.27288	165.253	191	3287	membrane	1	CC
GO:0010236	0.00695789	38.9714	0.14704	2	3	plastoquinone biosynthetic process	1	BP
GO:0016209	0.00717019	2.5415	4.70577	11	101	antioxidant activity	1	MF
GO:0030163	0.00734914	2.10842	8.13621	16	166	protein catabolic process	1	BP
GO:0009626	0.00744369	3.43272	2.30363	7	47	plant-type hypersensitive response	1	BP
GO:0016556	0.00744369	3.43272	2.30363	7	47	mRNA modification	1	BP
GO:0033692	0.00758683	2.00151	9.60661	18	196	cellular polysaccharide biosynthetic process	1	BP
GO:0008483	0.00767034	3.87803	1.77049	6	38	transaminase activity	1	MF
GO:0016769	0.00767034	3.87803	1.77049	6	38	transferase activity, transferring nitrogenous groups	1	MF
GO:0009110	0.00769968	3.07996	2.89178	8	59	vitamin biosynthetic process	1	BP
GO:0042816	0.00787305	9.75881	0.44112	3	9	vitamin B6 metabolic process	1	BP
GO:0042819	0.00787305	9.75881	0.44112	3	9	vitamin B6 biosynthetic process	1	BP
GO:0010304	0.00787305	9.75881	0.44112	3	9	PSII associated light-harvesting complex II catabolic process	1	BP
GO:0010189	0.00787305	9.75881	0.44112	3	9	vitamin E biosynthetic process	1	BP
GO:0071462	0.00787305	9.75881	0.44112	3	9	cellular response to water	1	BP
GO:0009772	0.00787305	9.75881	0.44112	3	9	photosynthetic electron transport in photosystem II	1	BP
GO:0042360	0.00787305	9.75881	0.44112	3	9	vitamin E metabolic process	1	BP
GO:0044257	0.0079814	2.14662	7.49903	15	153	cellular protein catabolic process	1	BP
GO:0015977	0.00814228	6.01392	0.833226	4	17	carbon fixation	1	BP
GO:0034050	0.00835698	3.34862	2.35264	7	48	host programmed cell death induced by symbiont	1	BP
GO:0009416	0.0085311	1.68897	18.1839	29	371	response to light stimulus	1	BP
GO:0006833	0.00912718	4.44741	1.32336	5	27	water transport	1	BP
GO:0042044	0.00912718	4.44741	1.32336	5	27	fluid transport	1	BP
GO:0042623	0.00946216	2.09939	7.64105	15	164	ATPase activity, coupled	1	MF
GO:0051788	0.00974348	3.67309	1.86251	6	38	response to misfolded protein	1	BP
GO:0043248	0.00974348	3.67309	1.86251	6	38	proteasome assembly	1	BP
GO:0043531	2.40973e-05	3.07497	7.62193	21	252	ADP binding	2	MF
GO:0003887	8.10347e-05	14.8281	0.483932	5	16	DNA-directed DNA polymerase activity	2	MF
GO:0034061	8.42885e-05	7.91724	1.08885	7	36	DNA polymerase activity	2	MF
GO:0071897	0.000243859	11.0269	0.596311	5	20	DNA biosynthetic process	2	BP
GO:0006974	0.000457279	3.08234	4.97919	14	167	response to DNA damage stimulus	2	BP
GO:0006310	0.000468736	3.98099	2.80266	10	94	DNA recombination	2	BP
GO:0030896	0.000989867	Inf	0.0630248	2	2	checkpoint clamp complex	2	CC
GO:0016779	0.0015769	3.1264	3.84121	11	127	nucleotidyltransferase activity	2	MF
GO:0006281	0.00163142	2.93365	4.44251	12	149	DNA repair	2	BP
GO:0090304	0.00192072	1.53404	51.402	71	1724	nucleic acid metabolic process	2	BP
GO:0000075	0.00192731	16.4364	0.26834	3	9	cell cycle checkpoint	2	BP
GO:0071156	0.00192731	16.4364	0.26834	3	9	regulation of cell cycle arrest	2	BP
GO:0010212	0.00204376	6.3539	0.924281	5	31	response to ionizing radiation	2	BP
GO:0006259	0.00220107	2.12476	10.6143	21	356	DNA metabolic process	2	BP
GO:0016192	0.00220168	2.4845	6.49979	15	218	vesicle-mediated transport	2	BP
GO:0045935	0.00267543	2.62423	5.33698	13	179	positive regulation of nucleobase-containing compound metabolic process	2	BP
GO:0051173	0.00280865	2.60823	5.3668	13	180	positive regulation of nitrogen compound metabolic process	2	BP
GO:0006139	0.00419049	1.4393	66.5781	86	2233	nucleobase-containing compound metabolic process	2	BP
GO:0031325	0.00461129	2.35758	6.35071	14	213	positive regulation of cellular metabolic process	2	BP
GO:0043168	0.00481233	1.43823	64.2117	83	2123	anion binding	2	MF
GO:0010345	0.00510768	32.7681	0.119262	2	4	suberin biosynthetic process	2	BP
GO:0007021	0.00510768	32.7681	0.119262	2	4	tubulin complex assembly	2	BP
GO:0072668	0.00510768	32.7681	0.119262	2	4	tubulin complex biogenesis	2	BP
GO:0032559	0.00596095	1.4545	52.8696	70	1748	adenyl ribonucleotide binding	2	MF
GO:0001883	0.00599674	1.44308	56.4991	74	1868	purine nucleoside binding	2	MF
GO:0032550	0.00599674	1.44308	56.4991	74	1868	purine ribonucleoside binding	2	MF
GO:0016070	0.00612164	1.48893	43.0834	59	1445	RNA metabolic process	2	BP
GO:0000166	0.0061706	1.4116	69.414	88	2295	nucleotide binding	2	MF
GO:0032549	0.00624376	1.44004	56.5898	74	1871	ribonucleoside binding	2	MF
GO:0015605	0.00624861	9.71487	0.393195	3	13	organophosphate ester transmembrane transporter activity	2	MF
GO:0001882	0.00632804	1.43903	56.62	74	1872	nucleoside binding	2	MF
GO:0032553	0.00648486	1.43227	58.4953	76	1934	ribonucleotide binding	2	MF
GO:0015748	0.00688937	5.98806	0.775204	4	26	organophosphate ester transport	2	BP
GO:0032011	0.00747748	8.96033	0.417417	3	14	ARF protein signal transduction	2	BP
GO:0032012	0.00747748	8.96033	0.417417	3	14	regulation of ARF protein signal transduction	2	BP
GO:0007050	0.00747748	8.96033	0.417417	3	14	cell cycle arrest	2	BP
GO:0060249	0.00790139	5.72707	0.805019	4	27	anatomical structure homeostasis	2	BP
GO:0032200	0.00790139	5.72707	0.805019	4	27	telomere organization	2	BP
GO:0000723	0.00790139	5.72707	0.805019	4	27	telomere maintenance	2	BP
GO:0051701	0.00866294	4.34162	1.28207	5	43	interaction with host	2	BP
GO:0030554	0.00870316	1.42494	53.7164	70	1776	adenyl nucleotide binding	2	MF
GO:0006302	0.00954132	4.22983	1.31188	5	44	double-strand break repair	2	BP
GO:0016458	2.94347e-05	4.10691	3.85757	14	128	gene silencing	3	BP
GO:0031047	3.6452e-05	4.29459	3.43565	13	114	gene silencing by RNA	3	BP
GO:0000226	7.73126e-05	5.09679	2.2603	10	75	microtubule cytoskeleton organization	3	BP
GO:0000910	0.000110032	6.28013	1.50686	8	50	cytokinesis	3	BP
GO:0043531	0.000149796	2.74663	8.01423	20	252	ADP binding	3	MF
GO:0010468	0.000232734	1.831	30.3181	50	1006	regulation of gene expression	3	BP
GO:0010629	0.000517753	2.9084	5.63567	15	187	negative regulation of gene expression	3	BP
GO:0019222	0.000554462	1.68498	38.9072	59	1291	regulation of metabolic process	3	BP
GO:0051276	0.0005735	2.58784	7.56446	18	251	chromosome organization	3	BP
GO:0090304	0.000620621	1.60176	51.9567	74	1724	nucleic acid metabolic process	3	BP
GO:0043414	0.00101288	2.82129	5.39457	14	179	macromolecule methylation	3	BP
GO:0005634	0.00106035	1.62314	41.6477	61	1461	nucleus	3	CC
GO:0032506	0.00115034	5.78118	1.20549	6	40	cytokinetic process	3	BP
GO:0040029	0.00118424	3.24871	3.70689	11	123	regulation of gene expression, epigenetic	3	BP
GO:0016568	0.00120371	2.89547	4.88224	13	162	chromatin modification	3	BP
GO:0060255	0.00120608	1.67532	33.3921	51	1108	regulation of macromolecule metabolic process	3	BP
GO:0033205	0.00131403	5.61538	1.23563	6	41	cell cycle cytokinesis	3	BP
GO:0004525	0.00171765	9.48609	0.540643	4	17	ribonuclease III activity	3	MF
GO:0032296	0.00171765	9.48609	0.540643	4	17	double-stranded RNA-specific ribonuclease activity	3	MF
GO:0010605	0.00186072	2.53216	6.3891	15	212	negative regulation of macromolecule metabolic process	3	BP
GO:0030422	0.00191299	5.17033	1.32604	6	44	production of siRNA involved in RNA interference	3	BP
GO:0003677	0.00215928	1.65244	30.9438	47	973	DNA binding	3	MF
GO:0046785	0.00218807	8.69122	0.572608	4	19	microtubule polymerization	3	BP
GO:0005815	0.00236951	14.7558	0.285063	3	10	microtubule organizing center	3	CC
GO:0000784	0.00238337	68.652	0.0855188	2	3	nuclear chromosome, telomeric region	3	CC
GO:0070918	0.00241401	4.91073	1.38631	6	46	production of small RNA involved in gene silencing by RNA	3	BP
GO:0031050	0.00241401	4.91073	1.38631	6	46	dsRNA fragmentation	3	BP
GO:0071359	0.00241401	4.91073	1.38631	6	46	cellular response to dsRNA	3	BP
GO:0043331	0.00241401	4.91073	1.38631	6	46	response to dsRNA	3	BP
GO:0006952	0.00255362	1.84564	17.4796	30	580	defense response	3	BP
GO:0007020	0.00267099	8.14711	0.602746	4	20	microtubule nucleation	3	BP
GO:0031109	0.00267099	8.14711	0.602746	4	20	microtubule polymerization or depolymerization	3	BP
GO:0035194	0.00299629	4.02753	1.92879	7	64	posttranscriptional gene silencing by RNA	3	BP
GO:0009892	0.00299891	2.32387	7.38363	16	245	negative regulation of metabolic process	3	BP
GO:0006325	0.00315746	2.46972	6.08773	14	202	chromatin organization	3	BP
GO:0016441	0.00356969	3.89014	1.98906	7	66	posttranscriptional gene silencing	3	BP
GO:0006305	0.00370452	4.46231	1.50686	6	50	DNA alkylation	3	BP
GO:0006306	0.00370452	4.46231	1.50686	6	50	DNA methylation	3	BP
GO:0000911	0.0037106	5.44263	1.0548	5	35	cytokinesis by cell plate formation	3	BP
GO:0009799	0.00384619	7.24027	0.66302	4	22	specification of symmetry	3	BP
GO:0000956	0.00384619	7.24027	0.66302	4	22	nuclear-transcribed mRNA catabolic process	3	BP
GO:0090305	0.00412327	2.72932	4.33977	11	144	nucleic acid phosphodiester bond hydrolysis	3	BP
GO:0007010	0.00412327	2.72932	4.33977	11	144	cytoskeleton organization	3	BP
GO:0043687	0.00420493	5.26648	1.08494	5	36	post-translational protein modification	3	BP
GO:0008134	0.00434396	11.5269	0.349828	3	11	transcription factor binding	3	MF
GO:0007017	0.00442536	2.86475	3.76716	10	125	microtubule-based process	3	BP
GO:0006304	0.00451435	4.26735	1.56714	6	52	DNA modification	3	BP
GO:0048449	0.00474454	5.10134	1.11508	5	37	floral organ formation	3	BP
GO:0006401	0.00474454	5.10134	1.11508	5	37	RNA catabolic process	3	BP
GO:0016070	0.00500119	1.50115	43.5484	60	1445	RNA metabolic process	3	BP
GO:0006402	0.00532925	6.5148	0.723295	4	24	mRNA catabolic process	3	BP
GO:0016246	0.00544768	4.08864	1.62741	6	54	RNA interference	3	BP
GO:0006139	0.00575988	1.41654	67.2965	86	2233	nucleobase-containing compound metabolic process	3	BP
GO:0000281	0.00596816	4.80019	1.17535	5	39	cytokinesis after mitosis	3	BP
GO:0032259	0.00712716	2.00845	9.52338	18	316	methylation	3	BP
GO:0016569	0.00718874	2.65415	4.0384	10	134	covalent chromatin modification	3	BP
GO:0016891	0.00747587	5.86694	0.795063	4	25	endoribonuclease activity, producing 5'-phosphomonoesters	3	MF
GO:0006915	0.00820119	5.66316	0.813707	4	27	apoptosis	3	BP
GO:0001172	0.00852144	21.601	0.150686	2	5	transcription, RNA-dependent	3	BP
GO:0048444	0.00905172	4.293	1.2959	5	43	floral organ morphogenesis	3	BP
GO:0048563	0.00905172	4.293	1.2959	5	43	post-embryonic organ morphogenesis	3	BP
GO:0030695	0.00922115	4.28578	1.3039	5	41	GTPase regulator activity	3	MF
GO:0003968	0.00945788	20.4319	0.159013	2	5	RNA-directed RNA polymerase activity	3	MF
GO:0006139	3.97517e-20	3.15329	67.2965	137	2233	nucleobase-containing compound metabolic process	4	BP
GO:0090304	5.55409e-19	3.20078	51.9567	115	1724	nucleic acid metabolic process	4	BP
GO:0006725	3.20299e-18	2.9466	72.1486	139	2394	cellular aromatic compound metabolic process	4	BP
GO:0046483	2.55476e-17	2.87265	70.4308	135	2337	heterocycle metabolic process	4	BP
GO:0034641	2.12839e-16	2.74637	79.7734	144	2647	cellular nitrogen compound metabolic process	4	BP
GO:0006807	2.86191e-16	2.72835	81.7624	146	2713	nitrogen compound metabolic process	4	BP
GO:0006396	6.22417e-14	4.38306	12.7179	45	422	RNA processing	4	BP
GO:0044281	9.54836e-14	2.46988	98.0064	158	3252	small molecule metabolic process	4	BP
GO:0016070	1.59152e-12	2.67352	43.5484	90	1445	RNA metabolic process	4	BP
GO:0003676	3.25152e-11	2.49577	49.4095	94	1709	nucleic acid binding	4	MF
GO:0010467	5.98371e-11	2.39945	52.68	98	1748	gene expression	4	BP
GO:0006259	1.21326e-10	4.00546	10.7289	36	356	DNA metabolic process	4	BP
GO:0043170	2.67947e-09	2.05556	122.508	171	4065	macromolecule metabolic process	4	BP
GO:0040029	3.98941e-09	6.23315	3.70689	19	123	regulation of gene expression, epigenetic	4	BP
GO:0044260	2.52167e-08	1.95361	110.935	156	3681	cellular macromolecule metabolic process	4	BP
GO:0048609	2.66832e-08	6.68027	2.92332	16	97	multicellular organismal reproductive process	4	BP
GO:0051028	3.64348e-08	13.8669	1.02467	10	34	mRNA transport	4	BP
GO:0051052	4.25418e-08	8.55253	1.92879	13	64	regulation of DNA metabolic process	4	BP
GO:0031047	4.60811e-08	5.93885	3.43565	17	114	gene silencing by RNA	4	BP
GO:0006260	5.98493e-08	5.45756	3.91785	18	130	DNA replication	4	BP
GO:0003006	6.06946e-08	2.93299	15.37	39	510	developmental process involved in reproduction	4	BP
GO:0032504	7.38392e-08	6.14408	3.13428	16	104	multicellular organism reproduction	4	BP
GO:0051236	8.93325e-08	12.322	1.11508	10	37	establishment of RNA localization	4	BP
GO:0050657	8.93325e-08	12.322	1.11508	10	37	nucleic acid transport	4	BP
GO:0050658	8.93325e-08	12.322	1.11508	10	37	RNA transport	4	BP
GO:0006403	8.93325e-08	12.322	1.11508	10	37	RNA localization	4	BP
GO:0003723	9.62008e-08	3.02187	13.7907	36	477	RNA binding	4	MF
GO:0007276	1.40341e-07	8.53848	1.7781	12	59	gamete generation	4	BP
GO:0006996	1.4042e-07	2.49833	23.2358	50	771	organelle organization	4	BP
GO:0004386	1.7712e-07	6.15591	2.92005	15	101	helicase activity	4	MF
GO:0010267	2.03209e-07	13.5677	0.934256	9	31	production of ta-siRNAs involved in RNA interference	4	BP
GO:0016458	2.6062e-07	5.18168	3.85757	17	128	gene silencing	4	BP
GO:0071841	3.0865e-07	2.21421	33.362	63	1107	cellular component organization or biogenesis at cellular level	4	BP
GO:0000003	3.30894e-07	2.59321	19.0468	43	632	reproduction	4	BP
GO:0010605	3.86088e-07	3.95785	6.3891	22	212	negative regulation of macromolecule metabolic process	4	BP
GO:0048608	5.21043e-07	2.92877	12.8385	33	426	reproductive structure development	4	BP
GO:0022414	5.51687e-07	2.59771	18.0522	41	599	reproductive process	4	BP
GO:0010228	5.59561e-07	5.18955	3.61647	16	120	vegetative to reproductive phase transition of meristem	4	BP
GO:0048856	6.18034e-07	2.30631	26.5509	53	881	anatomical structure development	4	BP
GO:0033044	6.40097e-07	11.4753	1.0548	9	35	regulation of chromosome organization	4	BP
GO:0051168	6.40097e-07	11.4753	1.0548	9	35	nuclear export	4	BP
GO:0006730	8.49734e-07	3.15994	10.0659	28	334	one-carbon metabolic process	4	BP
GO:0008380	1.06811e-06	5.25552	3.34524	15	111	RNA splicing	4	BP
GO:0009561	1.16204e-06	6.79277	2.13975	12	71	megagametogenesis	4	BP
GO:0007292	1.53015e-06	8.51925	1.47673	10	49	female gamete generation	4	BP
GO:0009560	1.53015e-06	8.51925	1.47673	10	49	embryo sac egg cell differentiation	4	BP
GO:0043414	1.74762e-06	4.02617	5.39457	19	179	macromolecule methylation	4	BP
GO:0043227	1.79844e-06	2.09004	264.164	297	7562	membrane-bounded organelle	4	CC
GO:0043231	1.79844e-06	2.09004	264.164	297	7562	intracellular membrane-bounded organelle	4	CC
GO:0032502	1.94049e-06	2.13745	31.3126	58	1039	developmental process	4	BP
GO:0009933	1.98482e-06	7.18315	1.86851	11	62	meristem structural organization	4	BP
GO:0006406	2.02458e-06	12.016	0.904118	8	30	mRNA export from nucleus	4	BP
GO:0071842	2.12116e-06	2.20053	27.6359	53	917	cellular component organization at cellular level	4	BP
GO:0006261	2.12934e-06	6.35865	2.2603	12	75	DNA-dependent DNA replication	4	BP
GO:0006275	2.17141e-06	9.61907	1.20549	9	40	regulation of DNA replication	4	BP
GO:0005622	2.43273e-06	2.75596	294.871	320	8441	intracellular	4	CC
GO:0006974	2.63972e-06	4.08533	5.03293	18	167	response to DNA damage stimulus	4	BP
GO:0035194	2.75235e-06	6.91055	1.92879	11	64	posttranscriptional gene silencing by RNA	4	BP
GO:0048532	2.75235e-06	6.91055	1.92879	11	64	anatomical structure arrangement	4	BP
GO:0019953	3.7486e-06	5.97636	2.38085	12	79	sexual reproduction	4	BP
GO:0016441	3.76837e-06	6.65778	1.98906	11	66	posttranscriptional gene silencing	4	BP
GO:0016246	3.90015e-06	7.54696	1.62741	10	54	RNA interference	4	BP
GO:0015931	4.38953e-06	6.53816	2.0192	11	67	nucleobase-containing compound transport	4	BP
GO:0006405	4.43914e-06	10.5705	0.99453	8	33	RNA export from nucleus	4	BP
GO:0009892	4.43932e-06	3.35959	7.38363	22	245	negative regulation of metabolic process	4	BP
GO:0009791	5.02047e-06	2.4653	16.907	37	561	post-embryonic development	4	BP
GO:0030422	5.06429e-06	8.51597	1.32604	9	44	production of siRNA involved in RNA interference	4	BP
GO:0009553	5.51223e-06	5.23647	2.89318	13	96	embryo sac development	4	BP
GO:0045595	6.16515e-06	8.27849	1.35618	9	45	regulation of cell differentiation	4	BP
GO:0051276	6.57668e-06	3.26934	7.56446	22	251	chromosome organization	4	BP
GO:0016568	7.2338e-06	3.95157	4.88224	17	162	chromatin modification	4	BP
GO:0070918	7.46478e-06	8.05386	1.38631	9	46	production of small RNA involved in gene silencing by RNA	4	BP
GO:0031050	7.46478e-06	8.05386	1.38631	9	46	dsRNA fragmentation	4	BP
GO:0071359	7.46478e-06	8.05386	1.38631	9	46	cellular response to dsRNA	4	BP
GO:0043331	7.46478e-06	8.05386	1.38631	9	46	response to dsRNA	4	BP
GO:0019915	8.4263e-06	12.1337	0.783569	7	26	lipid storage	4	BP
GO:0050826	8.4263e-06	12.1337	0.783569	7	26	response to freezing	4	BP
GO:0071704	9.21243e-06	1.75413	165.363	200	5487	organic substance metabolic process	4	BP
GO:0043226	9.36255e-06	2.04278	271.885	301	7783	organelle	4	CC
GO:0043229	9.36255e-06	2.04278	271.885	301	7783	intracellular organelle	4	CC
GO:0032259	9.44129e-06	2.93707	9.52338	25	316	methylation	4	BP
GO:0005739	1.01563e-05	1.73073	66.4778	99	1903	mitochondrion	4	CC
GO:0044424	1.1272e-05	2.43997	292.914	317	8385	intracellular part	4	CC
GO:0007275	1.2848e-05	2.04748	29.3838	53	975	multicellular organismal development	4	BP
GO:0022412	1.28592e-05	7.44733	1.47673	9	49	cellular process involved in reproduction in multicellular organism	4	BP
GO:0006913	1.5378e-05	5.62724	2.29043	11	76	nucleocytoplasmic transport	4	BP
GO:0051169	1.5378e-05	5.62724	2.29043	11	76	nuclear transport	4	BP
GO:0048507	1.54766e-05	4.37901	3.64661	14	121	meristem development	4	BP
GO:0090329	1.59716e-05	23.3851	0.361647	5	12	regulation of DNA-dependent DNA replication	4	BP
GO:0009793	1.64776e-05	4.08949	4.15894	15	138	embryo development ending in seed dormancy	4	BP
GO:0048519	1.71716e-05	2.70441	11.1207	27	369	negative regulation of biological process	4	BP
GO:0033043	1.97996e-05	5.45804	2.35071	11	78	regulation of organelle organization	4	BP
GO:0071322	2.04685e-05	8.25183	1.20549	8	40	cellular response to carbohydrate stimulus	4	BP
GO:0006304	2.12739e-05	6.92544	1.56714	9	52	DNA modification	4	BP
GO:0044238	2.18754e-05	1.71143	166.991	200	5541	primary metabolic process	4	BP
GO:0000278	2.24815e-05	4.21932	3.76716	14	125	mitotic cell cycle	4	BP
GO:0071840	2.35771e-05	1.85795	42.0114	68	1394	cellular component organization or biogenesis	4	BP
GO:0010073	2.49884e-05	5.92185	1.98906	10	66	meristem maintenance	4	BP
GO:0032501	2.77664e-05	1.95957	31.7647	55	1054	multicellular organismal process	4	BP
GO:0006281	4.10705e-05	3.74916	4.49045	15	149	DNA repair	4	BP
GO:0035195	4.24854e-05	7.33171	1.32604	8	44	gene silencing by miRNA	4	BP
GO:0010629	4.74826e-05	3.36098	5.63567	17	187	negative regulation of gene expression	4	BP
GO:0016569	4.92006e-05	3.89894	4.0384	14	134	covalent chromatin modification	4	BP
GO:0016482	5.47142e-05	3.18899	6.26855	18	208	cytoplasmic transport	4	BP
GO:0010014	5.60322e-05	8.53095	1.02467	7	34	meristem initiation	4	BP
GO:0051235	5.60322e-05	8.53095	1.02467	7	34	maintenance of location	4	BP
GO:0009059	5.91559e-05	1.73963	51.6553	78	1714	macromolecule biosynthetic process	4	BP
GO:0008033	6.04094e-05	5.95125	1.7781	9	59	tRNA processing	4	BP
GO:0010074	6.04674e-05	10.9394	0.723295	6	24	maintenance of meristem identity	4	BP
GO:0007049	6.40025e-05	2.85255	8.13707	21	270	cell cycle	4	BP
GO:0019693	6.6789e-05	2.43591	12.6878	28	421	ribose phosphate metabolic process	4	BP
GO:0022611	6.82551e-05	8.22536	1.0548	7	35	dormancy process	4	BP
GO:0010162	6.82551e-05	8.22536	1.0548	7	35	seed dormancy	4	BP
GO:0010182	6.82551e-05	8.22536	1.0548	7	35	sugar mediated signaling pathway	4	BP
GO:0009756	6.82551e-05	8.22536	1.0548	7	35	carbohydrate mediated signaling	4	BP
GO:0034645	7.30358e-05	1.73082	51.1128	77	1696	cellular macromolecule biosynthetic process	4	BP
GO:0048869	7.5212e-05	2.61329	10.1261	24	336	cellular developmental process	4	BP
GO:0009640	7.73126e-05	5.09679	2.2603	10	75	photomorphogenesis	4	BP
GO:0009790	7.92999e-05	3.35208	5.30416	16	176	embryo development	4	BP
GO:0016572	7.97506e-05	14.8748	0.482196	5	16	histone phosphorylation	4	BP
GO:0016043	8.39934e-05	1.8251	37.099	60	1231	cellular component organization	4	BP
GO:0048285	8.56166e-05	4.20176	3.22469	12	107	organelle fission	4	BP
GO:0016071	8.70806e-05	3.48488	4.79183	15	159	mRNA metabolic process	4	BP
GO:0006014	9.26161e-05	2.3851	12.9289	28	429	D-ribose metabolic process	4	BP
GO:0070035	9.52863e-05	5.55585	1.87924	9	65	purine NTP-dependent helicase activity	4	MF
GO:0008026	9.52863e-05	5.55585	1.87924	9	65	ATP-dependent helicase activity	4	MF
GO:0048731	9.72915e-05	2.13617	18.6248	36	618	system development	4	BP
GO:0048863	9.8309e-05	9.84327	0.783569	6	26	stem cell differentiation	4	BP
GO:0048864	9.8309e-05	9.84327	0.783569	6	26	stem cell development	4	BP
GO:0019827	9.8309e-05	9.84327	0.783569	6	26	stem cell maintenance	4	BP
GO:0014070	0.000102591	4.11421	3.28496	12	109	response to organic cyclic compound	4	BP
GO:0006397	0.000103986	4.45217	2.80277	11	93	mRNA processing	4	BP
GO:2000104	0.000105934	97.5755	0.120549	3	4	negative regulation of DNA-dependent DNA replication	4	BP
GO:0009653	0.000108612	2.44509	11.6933	26	388	anatomical structure morphogenesis	4	BP
GO:0034654	0.000109953	1.8466	33.3921	55	1108	nucleobase-containing biosynthetic process	4	BP
GO:0006305	0.000110032	6.28013	1.50686	8	50	DNA alkylation	4	BP
GO:0006306	0.000110032	6.28013	1.50686	8	50	DNA methylation	4	BP
GO:0051128	0.000112112	4.07177	3.3151	12	110	regulation of cellular component organization	4	BP
GO:0006399	0.000112815	3.79933	3.82743	13	127	tRNA metabolic process	4	BP
GO:0006310	0.00011467	4.39804	2.8329	11	94	DNA recombination	4	BP
GO:0010604	0.000115443	3.38917	4.91238	15	163	positive regulation of macromolecule metabolic process	4	BP
GO:0035196	0.000118558	7.42689	1.14522	7	38	production of miRNAs involved in gene silencing by miRNA	4	BP
GO:2000241	0.00012224	3.76587	3.85757	13	128	regulation of reproductive process	4	BP
GO:0006325	0.000124324	3.08325	6.08773	17	202	chromatin organization	4	BP
GO:0016818	0.000126154	2.30539	13.8775	29	480	hydrolase activity, acting on acid anhydrides, in phosphorus-containing anhydrides	4	MF
GO:0045934	0.000126276	4.34519	2.86304	11	95	negative regulation of nucleobase-containing compound metabolic process	4	BP
GO:0009259	0.000137344	2.32438	13.2303	28	439	ribonucleotide metabolic process	4	BP
GO:0000375	0.000146392	5.99334	1.56714	8	52	RNA splicing, via transesterification reactions	4	BP
GO:0000377	0.000146392	5.99334	1.56714	8	52	RNA splicing, via transesterification reactions with bulged adenosine as nucleophile	4	BP
GO:0048451	0.000146908	21.7497	0.301373	4	10	petal formation	4	BP
GO:0048453	0.000146908	21.7497	0.301373	4	10	sepal formation	4	BP
GO:0048447	0.000146908	21.7497	0.301373	4	10	sepal morphogenesis	4	BP
GO:0045596	0.000152911	8.94645	0.843844	6	28	negative regulation of cell differentiation	4	BP
GO:0005643	0.000160486	12.7314	0.55893	5	16	nuclear pore	4	CC
GO:0005488	0.000164474	1.66922	167.859	195	5806	binding	4	MF
GO:0010431	0.000166344	6.97523	1.20549	7	40	seed maturation	4	BP
GO:0051172	0.000167282	4.19395	2.95345	11	98	negative regulation of nitrogen compound metabolic process	4	BP
GO:0016817	0.000173961	2.25783	14.1377	29	489	hydrolase activity, acting on acid anhydrides	4	MF
GO:2000113	0.000183248	4.14583	2.98359	11	99	negative regulation of cellular macromolecule biosynthetic process	4	BP
GO:0034660	0.000184925	2.6244	8.76995	21	291	ncRNA metabolic process	4	BP
GO:0044428	0.000194724	2.26588	13.4842	28	386	nuclear part	4	CC
GO:0048316	0.000197075	3.21248	5.15347	15	171	seed development	4	BP
GO:0006312	0.000197086	11.6835	0.572608	5	19	mitotic recombination	4	BP
GO:0010558	0.000200487	4.09879	3.01373	11	100	negative regulation of macromolecule biosynthetic process	4	BP
GO:0033036	0.00020908	2.1949	14.9782	30	497	macromolecule localization	4	BP
GO:0006342	0.00021904	5.60892	1.65755	8	55	chromatin silencing	4	BP
GO:0048523	0.000220786	2.82367	6.99185	18	232	negative regulation of cellular process	4	BP
GO:0034470	0.000222979	2.92183	6.3891	17	212	ncRNA processing	4	BP
GO:0019438	0.000223864	1.73592	40.0826	62	1330	aromatic compound biosynthetic process	4	BP
GO:0022402	0.000223986	3.1711	5.21375	15	173	cell cycle process	4	BP
GO:0009658	0.000225351	3.51778	4.09867	13	136	chloroplast organization	4	BP
GO:0051053	0.000225398	18.6405	0.33151	4	11	negative regulation of DNA metabolic process	4	BP
GO:0048446	0.000225398	18.6405	0.33151	4	11	petal morphogenesis	4	BP
GO:0051607	0.000228626	6.57518	1.26577	7	42	defense response to virus	4	BP
GO:0019321	0.000240954	2.23864	13.6823	28	454	pentose metabolic process	4	BP
GO:0032042	0.00025892	48.7824	0.150686	3	5	mitochondrial DNA metabolic process	4	BP
GO:0008156	0.00025892	48.7824	0.150686	3	5	negative regulation of DNA replication	4	BP
GO:0009451	0.000270514	3.2634	4.73155	14	157	RNA modification	4	BP
GO:0050793	0.000272665	2.77061	7.1124	18	236	regulation of developmental process	4	BP
GO:0045814	0.000282183	5.37878	1.71782	8	57	negative regulation of gene expression, epigenetic	4	BP
GO:0044237	0.000286053	1.57201	169.1	197	5611	cellular metabolic process	4	BP
GO:0048464	0.000330111	16.3087	0.361647	4	12	flower calyx development	4	BP
GO:0048442	0.000330111	16.3087	0.361647	4	12	sepal development	4	BP
GO:0010154	0.00034474	3.03418	5.42471	15	180	fruit development	4	BP
GO:0030154	0.000351993	2.62621	7.89597	19	262	cell differentiation	4	BP
GO:0034655	0.000361324	2.37617	10.548	23	350	nucleobase-containing catabolic process	4	BP
GO:0031327	0.000364088	3.79695	3.22469	11	107	negative regulation of cellular biosynthetic process	4	BP
GO:0048229	0.000365895	3.01556	5.45485	15	181	gametophyte development	4	BP
GO:0016570	0.000404621	3.49403	3.7973	12	126	histone modification	4	BP
GO:0009890	0.000427534	3.71863	3.28496	11	109	negative regulation of biosynthetic process	4	BP
GO:0005634	0.000449199	1.60727	51.0373	74	1461	nucleus	4	CC
GO:0009908	0.000473697	2.63423	7.44391	18	247	flower development	4	BP
GO:0000002	0.00050629	32.518	0.180824	3	6	mitochondrial genome maintenance	4	BP
GO:0003690	0.00052618	8.99278	0.693873	5	24	double-stranded DNA binding	4	MF
GO:0016462	0.000536232	2.15313	13.6751	27	473	pyrophosphatase activity	4	MF
GO:0009909	0.000539925	3.60697	3.37538	11	112	regulation of flower development	4	BP
GO:0000911	0.000551845	6.78169	1.0548	6	35	cytokinesis by cell plate formation	4	BP
GO:0010876	0.000565826	4.78881	1.89865	8	63	lipid localization	4	BP
GO:0031324	0.000585829	3.15334	4.52059	13	150	negative regulation of cellular metabolic process	4	BP
GO:0017111	0.000587387	2.17203	13.039	26	451	nucleoside-triphosphatase activity	4	MF
GO:0048831	0.000603512	3.84322	2.89318	10	96	regulation of shoot development	4	BP
GO:0009615	0.000608091	5.47506	1.47673	7	49	response to virus	4	BP
GO:0051649	0.000611322	2.09861	14.496	28	481	establishment of localization in cell	4	BP
GO:0018130	0.000622993	1.6821	38.2442	58	1269	heterocycle biosynthetic process	4	BP
GO:0043687	0.000645699	6.55491	1.08494	6	36	post-translational protein modification	4	BP
GO:0046907	0.000647927	2.22662	11.6933	24	388	intracellular transport	4	BP
GO:0010628	0.000664417	3.10727	4.58087	13	152	positive regulation of gene expression	4	BP
GO:0060255	0.00068563	1.71746	33.3921	52	1108	regulation of macromolecule metabolic process	4	BP
GO:0001510	0.000700093	4.61975	1.95892	8	65	RNA methylation	4	BP
GO:0005635	0.000729557	6.47269	1.11786	6	32	nuclear envelope	4	CC
GO:0051301	0.00076021	2.79246	5.84663	15	194	cell division	4	BP
GO:0007005	0.000776245	4.5396	1.98906	8	66	mitochondrion organization	4	BP
GO:0051093	0.000778584	5.22503	1.537	7	51	negative regulation of developmental process	4	BP
GO:0009888	0.000792103	2.51036	7.77542	18	258	tissue development	4	BP
GO:0051726	0.000839502	3.40242	3.5562	11	118	regulation of cell cycle	4	BP
GO:0051254	0.000861426	3.18263	4.12881	12	137	positive regulation of RNA metabolic process	4	BP
GO:0010608	0.000861426	3.18263	4.12881	12	137	posttranscriptional regulation of gene expression	4	BP
GO:0045893	0.000861426	3.18263	4.12881	12	137	positive regulation of transcription, DNA-dependent	4	BP
GO:0031056	0.000866275	24.3858	0.210961	3	7	regulation of histone modification	4	BP
GO:0002252	0.000876925	5.10835	1.56714	7	52	immune effector process	4	BP
GO:0009161	0.000889753	2.55864	7.20281	17	239	ribonucleoside monophosphate metabolic process	4	BP
GO:0009893	0.000946565	2.46809	7.89597	18	262	positive regulation of metabolic process	4	BP
GO:0010388	0.00100274	5.95702	1.17535	6	39	cullin deneddylation	4	BP
GO:0000338	0.00100274	5.95702	1.17535	6	39	protein deneddylation	4	BP
GO:0000281	0.00100274	5.95702	1.17535	6	39	cytokinesis after mitosis	4	BP
GO:0045935	0.00101288	2.82129	5.39457	14	179	positive regulation of nucleobase-containing compound metabolic process	4	BP
GO:0051173	0.00106923	2.80398	5.42471	14	180	positive regulation of nitrogen compound metabolic process	4	BP
GO:0009123	0.0010694	2.51222	7.32336	17	243	nucleoside monophosphate metabolic process	4	BP
GO:0048465	0.00110333	10.8676	0.482196	4	16	corolla development	4	BP
GO:0048441	0.00110333	10.8676	0.482196	4	16	petal development	4	BP
GO:0043247	0.00110333	10.8676	0.482196	4	16	telomere maintenance in response to DNA damage	4	BP
GO:0060249	0.00112301	7.42836	0.813707	5	27	anatomical structure homeostasis	4	BP
GO:0032200	0.00112301	7.42836	0.813707	5	27	telomere organization	4	BP
GO:0000723	0.00112301	7.42836	0.813707	5	27	telomere maintenance	4	BP
GO:0009167	0.00114423	2.57727	6.72061	16	223	purine ribonucleoside monophosphate metabolic process	4	BP
GO:0009126	0.00114423	2.57727	6.72061	16	223	purine nucleoside monophosphate metabolic process	4	BP
GO:2000026	0.00114943	2.67058	6.08773	15	202	regulation of multicellular organismal development	4	BP
GO:0032506	0.00115034	5.78118	1.20549	6	40	cytokinetic process	4	BP
GO:0000280	0.00118214	3.80303	2.62194	9	87	nuclear division	4	BP
GO:0051239	0.0012082	2.65608	6.11787	15	203	regulation of multicellular organismal process	4	BP
GO:0044271	0.00122053	1.60063	43.5785	63	1446	cellular nitrogen compound biosynthetic process	4	BP
GO:0046930	0.00124055	7.36446	0.838395	5	24	pore complex	4	CC
GO:0017038	0.00126554	3.2196	3.73702	11	124	protein import	4	BP
GO:0071407	0.00128282	3.75447	2.65208	9	88	cellular response to organic cyclic compound	4	BP
GO:0009117	0.00129942	1.87915	19.0166	33	631	nucleotide metabolic process	4	BP
GO:0033205	0.00131403	5.61538	1.23563	6	41	cell cycle cytokinesis	4	BP
GO:0090305	0.00133263	3.01149	4.33977	12	144	nucleic acid phosphodiester bond hydrolysis	4	BP
GO:0031048	0.0013339	7.1046	0.843844	5	28	chromatin silencing by small RNA	4	BP
GO:0006753	0.00133416	1.87579	19.0468	33	632	nucleoside phosphate metabolic process	4	BP
GO:0022621	0.00143452	2.25654	9.55352	20	317	shoot system development	4	BP
GO:0048367	0.00143452	2.25654	9.55352	20	317	shoot development	4	BP
GO:0009119	0.0014815	2.11951	11.6933	23	388	ribonucleoside metabolic process	4	BP
GO:0051567	0.00149493	5.45879	1.26577	6	42	histone H3-K9 methylation	4	BP
GO:0051641	0.0014972	1.96569	15.37	28	510	cellular localization	4	BP
GO:0006163	0.00169408	2.09557	11.8138	23	392	purine nucleotide metabolic process	4	BP
GO:0032204	0.00176891	9.31305	0.542471	4	18	regulation of telomere maintenance	4	BP
GO:0032844	0.00176891	9.31305	0.542471	4	18	regulation of homeostatic process	4	BP
GO:0048580	0.00178596	2.89995	4.49045	12	149	regulation of post-embryonic development	4	BP
GO:0010557	0.00178596	2.89995	4.49045	12	149	positive regulation of macromolecule biosynthetic process	4	BP
GO:0048518	0.00180056	2.12233	11.1508	22	370	positive regulation of biological process	4	BP
GO:0000279	0.0018951	3.52902	2.80277	9	93	M phase	4	BP
GO:0000398	0.00191299	5.17033	1.32604	6	44	nuclear mRNA splicing, via spliceosome	4	BP
GO:0031325	0.00194863	2.51908	6.41924	15	213	positive regulation of cellular metabolic process	4	BP
GO:0070988	0.00198768	16.2536	0.271236	3	9	demethylation	4	BP
GO:0032875	0.00198768	16.2536	0.271236	3	9	regulation of DNA endoreduplication	4	BP
GO:0009880	0.00198768	16.2536	0.271236	3	9	embryonic pattern specification	4	BP
GO:0009116	0.00206173	2.06061	11.9946	23	398	nucleoside metabolic process	4	BP
GO:0051327	0.00206293	4.33343	1.80824	7	60	M phase of meiotic cell cycle	4	BP
GO:0007126	0.00206293	4.33343	1.80824	7	60	meiosis	4	BP
GO:0070646	0.00206293	4.33343	1.80824	7	60	protein modification by small protein removal	4	BP
GO:0019439	0.00219851	2.04921	12.0549	23	400	aromatic compound catabolic process	4	BP
GO:0009150	0.00220209	2.08492	11.3316	22	376	purine ribonucleotide metabolic process	4	BP
GO:0048468	0.00222503	2.97908	4.00826	11	133	cell development	4	BP
GO:0015031	0.00241815	2.03232	12.1453	23	403	protein transport	4	BP
GO:0031968	0.00244383	4.94544	1.39733	6	40	organelle outer membrane	4	CC
GO:0010385	0.00245044	67.6899	0.0867341	2	3	double-stranded methylated DNA binding	4	MF
GO:0046700	0.00265617	2.01571	12.2357	23	406	heterocycle catabolic process	4	BP
GO:2000757	0.00266118	64.8172	0.0904118	2	3	negative regulation of peptidyl-lysine acetylation	4	BP
GO:0033169	0.00266118	64.8172	0.0904118	2	3	histone H3-K9 demethylation	4	BP
GO:0031057	0.00266118	64.8172	0.0904118	2	3	negative regulation of histone modification	4	BP
GO:0010216	0.00266118	64.8172	0.0904118	2	3	maintenance of DNA methylation	4	BP
GO:0032876	0.00266118	64.8172	0.0904118	2	3	negative regulation of DNA endoreduplication	4	BP
GO:0016255	0.00266118	64.8172	0.0904118	2	3	attachment of GPI anchor to protein	4	BP
GO:0035067	0.00266118	64.8172	0.0904118	2	3	negative regulation of histone acetylation	4	BP
GO:0007267	0.00267099	8.14711	0.602746	4	20	cell-cell signaling	4	BP
GO:0007127	0.0026987	4.79042	1.41645	6	47	meiosis I	4	BP
GO:0044270	0.0027398	2.01022	12.2659	23	407	cellular nitrogen compound catabolic process	4	BP
GO:0010033	0.00276342	1.78302	19.9207	33	661	response to organic substance	4	BP
GO:0010072	0.00277659	13.9301	0.301373	3	10	primary shoot apical meristem specification	4	BP
GO:0009657	0.00278451	2.41906	6.66034	15	221	plastid organization	4	BP
GO:0022613	0.00278451	2.41906	6.66034	15	221	ribonucleoprotein complex biogenesis	4	BP
GO:0042623	0.00281631	2.73164	4.74147	12	164	ATPase activity, coupled	4	MF
GO:0046130	0.00282233	2.21537	8.70967	18	289	purine ribonucleoside catabolic process	4	BP
GO:0045184	0.00282565	2.00477	12.296	23	408	establishment of protein localization	4	BP
GO:0006152	0.00292892	2.20697	8.73981	18	290	purine nucleoside catabolic process	4	BP
GO:0006886	0.00292892	2.20697	8.73981	18	290	intracellular protein transport	4	BP
GO:0010564	0.00300783	4.67584	1.44659	6	48	regulation of cell cycle process	4	BP
GO:0048638	0.00300783	4.67584	1.44659	6	48	regulation of developmental growth	4	BP
GO:0009164	0.00303885	2.19864	8.76995	18	291	nucleoside catabolic process	4	BP
GO:0042454	0.00303885	2.19864	8.76995	18	291	ribonucleoside catabolic process	4	BP
GO:0033554	0.00313711	2.01953	11.6631	22	387	cellular response to stress	4	BP
GO:0006351	0.00316031	1.64891	28.2085	43	936	transcription, DNA-dependent	4	BP
GO:0009855	0.00322223	7.66702	0.632883	4	21	determination of bilateral symmetry	4	BP
GO:0031328	0.00323655	2.6811	4.82196	12	160	positive regulation of cellular biosynthetic process	4	BP
GO:0009891	0.00323655	2.6811	4.82196	12	160	positive regulation of biosynthetic process	4	BP
GO:0048610	0.00332291	2.81522	4.21922	11	140	cellular process involved in reproduction	4	BP
GO:0046128	0.00336602	2.04248	11.0001	21	365	purine ribonucleoside metabolic process	4	BP
GO:0042278	0.0034754	2.03632	11.0302	21	366	purine nucleoside metabolic process	4	BP
GO:0016604	0.00350348	5.59337	1.04799	5	30	nuclear body	4	CC
GO:0043566	0.00351826	5.50411	1.04081	5	36	structure-specific DNA binding	4	MF
GO:0042765	0.00356596	55.5761	0.104799	2	3	GPI-anchor transamidase complex	4	CC
GO:0009199	0.00359735	2.06873	10.3371	20	343	ribonucleoside triphosphate metabolic process	4	BP
GO:0032774	0.00362502	1.63468	28.4195	43	943	RNA biosynthetic process	4	BP
GO:0045892	0.00369867	3.45749	2.53153	8	84	negative regulation of transcription, DNA-dependent	4	BP
GO:0000910	0.00370452	4.46231	1.50686	6	50	cytokinesis	4	BP
GO:0010020	0.00373328	12.1875	0.33151	3	11	chloroplast fission	4	BP
GO:0009141	0.00384074	2.05553	10.3974	20	345	nucleoside triphosphate metabolic process	4	BP
GO:0010048	0.00384619	7.24027	0.66302	4	22	vernalization response	4	BP
GO:0009799	0.00384619	7.24027	0.66302	4	22	specification of symmetry	4	BP
GO:0009154	0.00390879	2.14196	8.98091	18	298	purine ribonucleotide catabolic process	4	BP
GO:0009146	0.00390879	2.14196	8.98091	18	298	purine nucleoside triphosphate catabolic process	4	BP
GO:0009261	0.00390879	2.14196	8.98091	18	298	ribonucleotide catabolic process	4	BP
GO:0009203	0.00390879	2.14196	8.98091	18	298	ribonucleoside triphosphate catabolic process	4	BP
GO:0009207	0.00390879	2.14196	8.98091	18	298	purine ribonucleoside triphosphate catabolic process	4	BP
GO:0008104	0.0039303	1.94661	12.6275	23	419	protein localization	4	BP
GO:0009143	0.00404842	2.13409	9.01105	18	299	nucleoside triphosphate catabolic process	4	BP
GO:0043933	0.0041147	1.85981	14.9481	26	496	macromolecular complex subunit organization	4	BP
GO:0010468	0.00418056	1.6036	30.3181	45	1006	regulation of gene expression	4	BP
GO:0006195	0.00419217	2.12628	9.04118	18	300	purine nucleotide catabolic process	4	BP
GO:0009247	0.00420493	5.26648	1.08494	5	36	glycolipid biosynthetic process	4	BP
GO:0031965	0.00422243	11.9371	0.349331	3	10	nuclear membrane	4	CC
GO:0051253	0.00427558	3.36808	2.59181	8	86	negative regulation of RNA metabolic process	4	BP
GO:0004003	0.0043302	11.3152	0.346937	3	12	ATP-dependent DNA helicase activity	4	MF
GO:0072521	0.00441294	1.92625	12.7481	23	423	purine-containing compound metabolic process	4	BP
GO:0019867	0.00448134	4.30909	1.57199	6	45	outer membrane	4	CC
GO:0034613	0.00449233	2.11083	9.10146	18	302	cellular protein localization	4	BP
GO:0009166	0.00449233	2.11083	9.10146	18	302	nucleotide catabolic process	4	BP
GO:0019219	0.00453445	1.61991	27.9373	42	927	regulation of nucleobase-containing compound metabolic process	4	BP
GO:0043207	0.00457616	2.558	5.03293	12	167	response to external biotic stimulus	4	BP
GO:0009845	0.00458179	3.70067	2.07947	7	69	seed germination	4	BP
GO:0046434	0.00464893	2.10318	9.1316	18	303	organophosphate catabolic process	4	BP
GO:0016886	0.00480735	33.8411	0.115646	2	4	ligase activity, forming phosphoric ester bonds	4	MF
GO:0048589	0.00481891	2.66822	4.43018	11	147	developmental growth	4	BP
GO:0043572	0.00486767	10.8321	0.361647	3	12	plastid fission	4	BP
GO:0006506	0.00486767	10.8321	0.361647	3	12	GPI anchor biosynthetic process	4	BP
GO:0009987	0.00488939	1.4795	207.194	226	6875	cellular process	4	BP
GO:0048522	0.00491016	2.14134	8.46858	17	281	positive regulation of cellular process	4	BP
GO:0009639	0.00495136	2.81515	3.82743	10	127	response to red or far red light	4	BP
GO:0072523	0.00497564	2.08805	9.19187	18	305	purine-containing compound catabolic process	4	BP
GO:0004519	0.00499242	3.63331	2.11053	7	73	endonuclease activity	4	MF
GO:0004518	0.00504931	3.00429	3.23807	9	112	nuclease activity	4	MF
GO:0006264	0.00521643	32.405	0.120549	2	4	mitochondrial DNA replication	4	BP
GO:0006266	0.00521643	32.405	0.120549	2	4	DNA ligation	4	BP
GO:2000756	0.00521643	32.405	0.120549	2	4	regulation of peptidyl-lysine acetylation	4	BP
GO:0031060	0.00521643	32.405	0.120549	2	4	regulation of histone methylation	4	BP
GO:0070076	0.00521643	32.405	0.120549	2	4	histone lysine demethylation	4	BP
GO:0035065	0.00521643	32.405	0.120549	2	4	regulation of histone acetylation	4	BP
GO:0016571	0.005268	3.24226	2.68222	8	89	histone methylation	4	BP
GO:0031406	0.00533302	4.1022	1.61904	6	56	carboxylic acid binding	4	MF
GO:0016891	0.00534979	6.48214	0.722784	4	25	endoribonuclease activity, producing 5'-phosphomonoesters	4	MF
GO:0051321	0.00536777	3.58423	2.13975	7	71	meiotic cell cycle	4	BP
GO:0006606	0.00544768	4.08864	1.62741	6	54	protein import into nucleus	4	BP
GO:0051170	0.00544768	4.08864	1.62741	6	54	nuclear import	4	BP
GO:0005741	0.00546509	6.56633	0.733596	4	21	mitochondrial outer membrane	4	CC
GO:0072594	0.00552138	2.49253	5.15347	12	171	establishment of protein localization to organelle	4	BP
GO:0009169	0.00552138	2.49253	5.15347	12	171	purine ribonucleoside monophosphate catabolic process	4	BP
GO:0009158	0.00552138	2.49253	5.15347	12	171	ribonucleoside monophosphate catabolic process	4	BP
GO:0009125	0.00552138	2.49253	5.15347	12	171	nucleoside monophosphate catabolic process	4	BP
GO:0009128	0.00552138	2.49253	5.15347	12	171	purine nucleoside monophosphate catabolic process	4	BP
GO:0022403	0.00553792	2.95908	3.28496	9	109	cell cycle phase	4	BP
GO:0072528	0.00563513	3.20236	2.71236	8	90	pyrimidine-containing compound biosynthetic process	4	BP
GO:0051171	0.00568077	1.59589	28.2989	42	939	regulation of nitrogen compound metabolic process	4	BP
GO:0034504	0.00596392	4.00475	1.65755	6	55	protein localization to nucleus	4	BP
GO:0044249	0.00615119	1.39078	80.4967	100	2671	cellular biosynthetic process	4	BP
GO:0042393	0.00618125	6.18679	0.751696	4	26	histone binding	4	MF
GO:0031400	0.00618831	9.74784	0.391785	3	13	negative regulation of protein modification process	4	BP
GO:0009144	0.0062288	1.99622	10.1261	19	336	purine nucleoside triphosphate metabolic process	4	BP
GO:0009205	0.0062288	1.99622	10.1261	19	336	purine ribonucleoside triphosphate metabolic process	4	BP
GO:0009887	0.00623148	2.90041	3.34524	9	111	organ morphogenesis	4	BP
GO:0090351	0.00625083	3.47484	2.20002	7	73	seedling development	4	BP
GO:0070727	0.00627113	2.0367	9.40283	18	312	cellular macromolecule localization	4	BP
GO:0010638	0.00665642	4.66253	1.20549	5	40	positive regulation of organelle organization	4	BP
GO:0009743	0.00680576	2.53561	4.64114	11	154	response to carbohydrate stimulus	4	BP
GO:0019222	0.00683609	1.50116	38.9072	54	1291	regulation of metabolic process	4	BP
GO:0009826	0.00685417	3.0883	2.80277	8	93	unidimensional cell growth	4	BP
GO:0042254	0.00686536	2.32259	5.96718	13	198	ribosome biogenesis	4	BP
GO:0006200	0.00691457	2.41518	5.30416	12	176	ATP catabolic process	4	BP
GO:0016741	0.00701663	2.3166	5.98465	13	207	transferase activity, transferring one-carbon groups	4	MF
GO:0008094	0.00709433	5.91712	0.780607	4	27	DNA-dependent ATPase activity	4	MF
GO:0010332	0.00715257	5.92123	0.783569	4	26	response to gamma radiation	4	BP
GO:0006346	0.00715257	5.92123	0.783569	4	26	methylation-dependent chromatin silencing	4	BP
GO:0044283	0.00723289	1.44887	49.6361	66	1647	small molecule biosynthetic process	4	BP
GO:0040008	0.00723793	3.37189	2.2603	7	75	regulation of growth	4	BP
GO:0000166	0.00763578	1.40786	66.3516	84	2295	nucleotide binding	4	MF
GO:0072527	0.00777122	3.01663	2.86304	8	95	pyrimidine-containing compound metabolic process	4	BP
GO:0071310	0.00782954	1.98775	9.61379	18	319	cellular response to organic substance	4	BP
GO:0051704	0.00806649	1.7352	16.5454	27	549	multi-organism process	4	BP
GO:0070013	0.00816269	1.81579	13.4143	23	384	intracellular organelle lumen	4	CC
GO:0043233	0.00816269	1.81579	13.4143	23	384	organelle lumen	4	CC
GO:0006664	0.00819619	4.40952	1.26577	5	42	glycolipid metabolic process	4	BP
GO:0006626	0.00819619	4.40952	1.26577	5	42	protein targeting to mitochondrion	4	BP
GO:0072655	0.00819619	4.40952	1.26577	5	42	establishment of protein localization in mitochondrion	4	BP
GO:0070585	0.00819619	4.40952	1.26577	5	42	protein localization in mitochondrion	4	BP
GO:0009616	0.00820119	5.66316	0.813707	4	27	virus induced gene silencing	4	BP
GO:0052018	0.00820119	5.66316	0.813707	4	27	modulation by symbiont of RNA levels in host	4	BP
GO:0052249	0.00820119	5.66316	0.813707	4	27	modulation of RNA levels in other organism involved in symbiotic interaction	4	BP
GO:0016577	0.00852144	21.601	0.150686	2	5	histone demethylation	4	BP
GO:0051983	0.00852144	21.601	0.150686	2	5	regulation of chromosome segregation	4	BP
GO:0033365	0.00857151	2.3424	5.45485	12	181	protein localization to organelle	4	BP
GO:0048444	0.00905172	4.293	1.2959	5	43	floral organ morphogenesis	4	BP
GO:0035825	0.00905172	4.293	1.2959	5	43	reciprocal DNA recombination	4	BP
GO:0048563	0.00905172	4.293	1.2959	5	43	post-embryonic organ morphogenesis	4	BP
GO:0046467	0.00905172	4.293	1.2959	5	43	membrane lipid biosynthetic process	4	BP
GO:0007059	0.00905172	4.293	1.2959	5	43	chromosome segregation	4	BP
GO:0007131	0.00905172	4.293	1.2959	5	43	reciprocal meiotic recombination	4	BP
GO:0031981	0.00907788	1.88188	11.2485	20	322	nuclear lumen	4	CC
GO:0044451	0.00916953	2.55769	4.19198	10	120	nucleoplasm part	4	CC
GO:0016893	0.00917794	5.4425	0.83843	4	29	endonuclease activity, active with either ribo- or deoxyribonucleic acids and producing 5'-phosphomonoesters	4	MF
GO:0000902	0.0092161	2.54984	4.18908	10	139	cell morphogenesis	4	BP
GO:0043177	0.00923964	4.26127	1.30101	5	45	organic acid binding	4	MF
GO:0007062	0.00934573	5.42659	0.843844	4	28	sister chromatid cohesion	4	BP
GO:0042023	0.00934573	5.42659	0.843844	4	28	DNA endoreduplication	4	BP
GO:0006505	0.0094162	8.1214	0.452059	3	15	GPI anchor metabolic process	4	BP
GO:0048508	0.0094162	8.1214	0.452059	3	15	embryonic meristem development	4	BP
GO:0046390	0.00969456	2.68707	3.58634	9	119	ribose phosphate biosynthetic process	4	BP
GO:0019302	0.00969456	2.68707	3.58634	9	119	D-ribose biosynthetic process	4	BP
GO:0071702	0.00982115	1.673	18.4139	29	611	organic substance transport	4	BP
GO:0006302	0.00996694	4.18246	1.32604	5	44	double-strand break repair	4	BP
GO:0009535	8.10004e-11	4.78928	7.57541	30	203	chloroplast thylakoid membrane	5	CC
GO:0055035	9.17815e-11	4.76123	7.61273	30	204	plastid thylakoid membrane	5	CC
GO:0009579	1.30072e-10	3.74264	12.352	39	331	thylakoid	5	CC
GO:0042651	1.50264e-10	4.51139	8.24712	31	221	thylakoid membrane	5	CC
GO:0034357	2.2883e-10	4.30073	8.88152	32	238	photosynthetic membrane	5	CC
GO:0015979	2.45193e-10	4.41407	8.41163	31	230	photosynthesis	5	BP
GO:0031976	3.66383e-10	3.99987	10.0757	34	270	plastid thylakoid	5	CC
GO:0009534	3.66383e-10	3.99987	10.0757	34	270	chloroplast thylakoid	5	CC
GO:0031984	8.84714e-10	3.8491	10.4115	34	279	organelle subcompartment	5	CC
GO:0044436	1.00391e-09	4.02084	9.40396	32	252	thylakoid part	5	CC
GO:0009507	2.16158e-08	2.11724	47.9527	86	1285	chloroplast	5	CC
GO:0016984	5.80048e-08	Inf	0.179584	5	5	ribulose-bisphosphate carboxylase activity	5	MF
GO:0009853	7.7797e-08	9.32488	1.7189	12	47	photorespiration	5	BP
GO:0044434	7.86135e-08	2.38109	27.5029	57	737	chloroplast part	5	CC
GO:0044435	1.24942e-07	2.34385	27.876	57	747	plastid part	5	CC
GO:0019684	4.46366e-07	4.27637	5.44927	20	149	photosynthesis, light reaction	5	BP
GO:0010207	6.09648e-07	6.06184	2.81607	14	77	photosystem II assembly	5	BP
GO:0010114	9.25925e-07	9.32806	1.42632	10	39	response to red light	5	BP
GO:0009536	3.19788e-06	1.67615	99.7491	139	2673	plastid	5	CC
GO:0010218	5.29131e-06	8.66986	1.35317	9	37	response to far red light	5	BP
GO:0009657	5.68497e-06	3.20906	8.08248	23	221	plastid organization	5	BP
GO:0043623	1.27445e-05	3.03635	8.48477	23	232	cellular protein complex assembly	5	BP
GO:0043094	1.34206e-05	5.24816	2.70635	12	74	cellular metabolic compound salvage	5	BP
GO:0015977	2.01324e-05	14.6084	0.621729	6	17	carbon fixation	5	BP
GO:0009637	4.09254e-05	5.62374	2.12119	10	58	response to blue light	5	BP
GO:0009941	0.00010824	2.35567	13.0237	28	349	chloroplast envelope	5	CC
GO:0070271	0.000111817	2.54006	10.3865	24	284	protein complex biogenesis	5	BP
GO:0022857	0.000120803	2.18059	16.6295	33	463	transmembrane transporter activity	5	MF
GO:0031967	0.000134876	2.06544	19.5916	37	525	organelle envelope	5	CC
GO:0031975	0.000140193	2.06098	19.6289	37	526	envelope	5	CC
GO:0009526	0.00015185	2.30359	13.285	28	356	plastid envelope	5	CC
GO:0071822	0.00015305	2.43212	11.2643	25	308	protein complex subunit organization	5	BP
GO:0005215	0.000167095	2.0079	21.3346	39	594	transporter activity	5	MF
GO:0016020	0.000190268	1.48588	122.662	155	3287	membrane	5	CC
GO:0006091	0.000213442	2.2907	12.8734	27	352	generation of precursor metabolites and energy	5	BP
GO:0009765	0.000224772	8.44996	0.914307	6	25	photosynthesis, light harvesting	5	BP
GO:0006461	0.000248516	2.44594	10.2768	23	281	protein complex assembly	5	BP
GO:0046496	0.000256818	3.48545	4.16924	13	114	nicotinamide nucleotide metabolic process	5	BP
GO:0019362	0.000280192	3.45089	4.20581	13	115	pyridine nucleotide metabolic process	5	BP
GO:0016717	0.000288916	18.1066	0.359168	4	10	oxidoreductase activity, acting on paired donors, with oxidation of a pair of donors resulting in the reduction of molecular oxygen to two molecules of water	5	MF
GO:0006811	0.000298806	2.03798	18.1764	34	497	ion transport	5	BP
GO:0006740	0.0003007	3.64496	3.6938	12	101	NADPH regeneration	5	BP
GO:0006098	0.0003007	3.64496	3.6938	12	101	pentose-phosphate shunt	5	BP
GO:0022891	0.000314099	2.19733	13.8998	28	387	substrate-specific transmembrane transporter activity	5	MF
GO:0009522	0.000316222	7.85339	0.97025	6	26	photosystem I	5	CC
GO:0055085	0.000331014	1.96479	20.5171	37	561	transmembrane transport	5	BP
GO:0051234	0.000332441	1.60595	54.8219	79	1499	establishment of localization	5	BP
GO:0035304	0.000390005	6.05215	1.38975	7	38	regulation of protein dephosphorylation	5	BP
GO:0022892	0.000404273	2.12845	14.8336	29	413	substrate-specific transporter activity	5	MF
GO:0052726	0.000435023	40.6313	0.179584	3	5	inositol-1,3,4-trisphosphate 5-kinase activity	5	MF
GO:0047325	0.000435023	40.6313	0.179584	3	5	inositol tetrakisphosphate 1-kinase activity	5	MF
GO:0006739	0.000471433	3.44914	3.87666	12	106	NADP metabolic process	5	BP
GO:0051179	0.000506913	1.57552	56.431	80	1543	localization	5	BP
GO:0006733	0.000509005	3.05875	5.04698	14	138	oxidoreduction coenzyme metabolic process	5	BP
GO:0015075	0.000532661	2.30577	10.8469	23	302	ion transmembrane transporter activity	5	MF
GO:0072524	0.000541656	3.19703	4.49839	13	123	pyridine-containing compound metabolic process	5	BP
GO:0009570	0.000570652	2.10349	14.4045	28	386	chloroplast stroma	5	CC
GO:0034622	0.000601379	2.28171	10.9351	23	299	cellular macromolecular complex assembly	5	BP
GO:0055114	0.000707215	1.62909	42.4239	63	1160	oxidation-reduction process	5	BP
GO:0035303	0.000735383	5.35808	1.53604	7	42	regulation of dephosphorylation	5	BP
GO:0006812	0.000776798	2.15573	12.5443	25	343	cation transport	5	BP
GO:0052725	0.0008469	27.0844	0.215501	3	6	inositol-1,3,4-trisphosphate 6-kinase activity	5	MF
GO:0005375	0.0008469	27.0844	0.215501	3	6	copper ion transmembrane transporter activity	5	MF
GO:0051766	0.0008469	27.0844	0.215501	3	6	inositol trisphosphate kinase activity	5	MF
GO:0009532	0.000850816	2.04403	14.7777	28	396	plastid stroma	5	CC
GO:0019288	0.000852963	3.02962	4.71782	13	129	isopentenyl diphosphate biosynthetic process, mevalonate-independent pathway	5	BP
GO:0019682	0.000852963	3.02962	4.71782	13	129	glyceraldehyde-3-phosphate metabolic process	5	BP
GO:0006810	0.000854635	1.56008	53.0298	75	1450	transport	5	BP
GO:0035434	0.000893174	26.568	0.219434	3	6	copper ion transmembrane transport	5	BP
GO:0034220	0.000937064	2.40636	8.55792	19	234	ion transmembrane transport	5	BP
GO:0031231	0.000947659	26.0056	0.223904	3	6	intrinsic to peroxisomal membrane	5	CC
GO:0005779	0.000947659	26.0056	0.223904	3	6	integral to peroxisomal membrane	5	CC
GO:0071844	0.000996113	2.11434	12.7637	25	349	cellular component assembly at cellular level	5	BP
GO:0046490	0.00105787	2.95224	4.82754	13	132	isopentenyl diphosphate metabolic process	5	BP
GO:0009240	0.00105787	2.95224	4.82754	13	132	isopentenyl diphosphate biosynthetic process	5	BP
GO:0008654	0.00116233	2.49526	7.3876	17	202	phospholipid biosynthetic process	5	BP
GO:0015089	0.00128617	Inf	0.0718336	2	2	high affinity copper ion transmembrane transporter activity	5	MF
GO:0042389	0.00128617	Inf	0.0718336	2	2	omega-3 fatty acid desaturase activity	5	MF
GO:0034621	0.00133041	2.13758	11.5934	23	317	cellular macromolecular complex subunit organization	5	BP
GO:0051765	0.00144272	20.3109	0.251418	3	7	inositol tetrakisphosphate kinase activity	5	MF
GO:0080129	0.00184466	6.6689	0.914307	5	25	proteasome core complex assembly	5	BP
GO:0046189	0.00184466	6.6689	0.914307	5	25	phenol-containing compound biosynthetic process	5	BP
GO:0006364	0.00203521	2.60955	5.81499	14	159	rRNA processing	5	BP
GO:0051606	0.00203847	5.17208	1.35317	6	37	detection of stimulus	5	BP
GO:0046915	0.00204579	6.47574	0.933837	5	26	transition metal ion transmembrane transporter activity	5	MF
GO:0048046	0.00218524	2.58733	5.85882	14	157	apoplast	5	CC
GO:0009697	0.00221641	6.35062	0.950879	5	26	salicylic acid biosynthetic process	5	BP
GO:0009521	0.00224081	3.81488	2.35099	8	63	photosystem	5	CC
GO:0006090	0.00227883	2.32799	7.86304	17	215	pyruvate metabolic process	5	BP
GO:0009639	0.00232281	2.81263	4.64468	12	127	response to red or far red light	5	BP
GO:0065003	0.00233446	2.03713	12.1054	23	331	macromolecular complex assembly	5	BP
GO:0005986	0.00236754	15.9373	0.292578	3	8	sucrose biosynthetic process	5	BP
GO:0022890	0.00256502	2.53901	5.96219	14	166	inorganic cation transmembrane transporter activity	5	MF
GO:0006629	0.00257274	1.6725	26.9903	42	738	lipid metabolic process	5	BP
GO:0018958	0.00263987	6.06128	0.987452	5	27	phenol-containing compound metabolic process	5	BP
GO:0016311	0.00278784	2.21973	8.7042	18	238	dephosphorylation	5	BP
GO:0009595	0.00286593	8.18991	0.621729	4	17	detection of biotic stimulus	5	BP
GO:0045271	0.00288341	5.9315	1.00757	5	27	respiratory chain complex I	5	CC
GO:0030964	0.00288341	5.9315	1.00757	5	27	NADH dehydrogenase complex	5	CC
GO:0016072	0.00338384	2.45455	6.14414	14	168	rRNA metabolic process	5	BP
GO:0015740	0.00345559	13.2796	0.329151	3	9	C4-dicarboxylate transport	5	BP
GO:0032957	0.00345559	13.2796	0.329151	3	9	inositol trisphosphate metabolic process	5	BP
GO:0022804	0.00346581	2.22722	8.18904	17	228	active transmembrane transporter activity	5	MF
GO:0010817	0.00349673	2.98523	3.65723	10	100	regulation of hormone levels	5	BP
GO:0044446	0.00351738	1.40646	76.4631	98	2049	intracellular organelle part	5	CC
GO:0010310	0.00357984	7.60407	0.658301	4	18	regulation of hydrogen peroxide metabolic process	5	BP
GO:0008324	0.00365493	2.27704	7.54253	16	210	cation transmembrane transporter activity	5	MF
GO:0009696	0.00365782	5.55494	1.0606	5	29	salicylic acid metabolic process	5	BP
GO:0044422	0.00385162	1.401	76.6871	98	2055	organelle part	5	CC
GO:0080086	0.00390425	52.9912	0.109717	2	3	stamen filament development	5	BP
GO:0046873	0.00407608	2.91483	3.73535	10	104	metal ion transmembrane transporter activity	5	MF
GO:0010243	0.00426023	5.33214	1.09717	5	30	response to organic nitrogen	5	BP
GO:0019253	0.00480376	11.3812	0.365723	3	10	reductive pentose-phosphate cycle	5	BP
GO:0019685	0.00480376	11.3812	0.365723	3	10	photosynthesis, dark reaction	5	BP
GO:0008299	0.00548122	2.17308	7.86304	16	215	isoprenoid biosynthetic process	5	BP
GO:0009056	0.00563678	1.50465	39.2421	55	1073	catabolic process	5	BP
GO:0019318	0.00565339	2.1096	8.59449	17	235	hexose metabolic process	5	BP
GO:0030001	0.00572827	2.16197	7.89961	16	216	metal ion transport	5	BP
GO:0010319	0.00574865	6.51053	0.746346	4	20	stromule	5	CC
GO:0022607	0.00594336	1.79932	15.3604	26	420	cellular component assembly	5	BP
GO:0006511	0.00598763	2.59327	4.57154	11	125	ubiquitin-dependent protein catabolic process	5	BP
GO:0016799	0.00602315	6.38245	0.754253	4	21	hydrolase activity, hydrolyzing N-glycosyl compounds	5	MF
GO:0010287	0.00617556	4.83046	1.19415	5	32	plastoglobule	5	CC
GO:0006081	0.00623811	2.27401	6.58301	14	180	cellular aldehyde metabolic process	5	BP
GO:0006825	0.00642781	9.95747	0.402295	3	11	copper ion transport	5	BP
GO:0006835	0.00642781	9.95747	0.402295	3	11	dicarboxylic acid transport	5	BP
GO:0019941	0.00713455	2.52593	4.68125	11	128	modification-dependent protein catabolic process	5	BP
GO:0043632	0.00713455	2.52593	4.68125	11	128	modification-dependent macromolecule catabolic process	5	BP
GO:0016168	0.00715686	6.02717	0.79017	4	22	chlorophyll binding	5	MF
GO:0044093	0.00732103	2.65682	4.05952	10	111	positive regulation of molecular function	5	BP
GO:0043085	0.00732103	2.65682	4.05952	10	111	positive regulation of catalytic activity	5	BP
GO:0009969	0.00761977	26.4926	0.146289	2	4	xyloglucan biosynthetic process	5	BP
GO:0006513	0.00761977	26.4926	0.146289	2	4	protein monoubiquitination	5	BP
GO:0009862	0.00762673	5.91164	0.80459	4	22	systemic acquired resistance, salicylic acid mediated signaling pathway	5	BP
GO:0009523	0.007637	3.82224	1.75391	6	47	photosystem II	5	CC
GO:0042578	0.00767951	2.08938	8.15312	16	227	phosphoric ester hydrolase activity	5	MF
GO:0008610	0.00774171	1.72043	17.2621	28	472	lipid biosynthetic process	5	BP
GO:0006644	0.00782892	2.03306	8.88707	17	243	phospholipid metabolic process	5	BP
GO:2000377	0.00897119	5.59988	0.841163	4	23	regulation of reactive oxygen species metabolic process	5	BP
GO:0090304	6.60649e-23	3.64139	50.4775	120	1724	nucleic acid metabolic process	6	BP
GO:0003676	1.00404e-21	3.64718	48.2693	114	1709	nucleic acid binding	6	MF
GO:0006139	1.377e-21	3.34262	65.3806	137	2233	nucleobase-containing compound metabolic process	6	BP
GO:0044281	7.36522e-19	2.99874	95.2162	166	3252	small molecule metabolic process	6	BP
GO:0046483	1.11692e-18	3.04274	68.4257	135	2337	heterocycle metabolic process	6	BP
GO:0034641	7.87956e-18	2.92025	77.5023	144	2647	cellular nitrogen compound metabolic process	6	BP
GO:0006725	3.03611e-17	2.89678	70.0946	134	2394	cellular aromatic compound metabolic process	6	BP
GO:0006259	3.26944e-17	5.54662	10.4234	45	356	DNA metabolic process	6	BP
GO:0006807	8.42342e-17	2.81655	79.4347	144	2713	nitrogen compound metabolic process	6	BP
GO:0044428	3.38584e-16	4.8397	12.4839	48	386	nuclear part	6	CC
GO:0016070	2.98907e-14	2.89194	42.3086	92	1445	RNA metabolic process	6	BP
GO:0032259	6.31313e-14	5.10292	9.25225	38	316	methylation	6	BP
GO:0010467	1.87037e-13	2.68349	51.1802	102	1748	gene expression	6	BP
GO:0043414	2.43809e-13	6.73605	5.24099	28	179	macromolecule methylation	6	BP
GO:0006730	3.72312e-13	4.78278	9.77928	38	334	one-carbon metabolic process	6	BP
GO:0031981	1.27635e-11	4.27241	10.414	37	322	nuclear lumen	6	CC
GO:0003723	2.80897e-11	3.78191	13.4725	42	477	RNA binding	6	MF
GO:0006396	3.03439e-11	3.89592	12.3559	40	422	RNA processing	6	BP
GO:0051276	3.99263e-11	4.93269	7.3491	30	251	chromosome organization	6	BP
GO:0005634	1.05135e-10	2.39395	47.2512	91	1461	nucleus	6	CC
GO:0044260	1.63596e-10	2.18952	107.777	159	3681	cellular macromolecule metabolic process	6	BP
GO:0031974	2.59647e-10	3.6457	12.6456	39	391	membrane-enclosed lumen	6	CC
GO:0016568	2.7662e-10	5.89859	4.74324	23	162	chromatin modification	6	BP
GO:0070013	5.66228e-10	3.60303	12.4192	38	384	intracellular organelle lumen	6	CC
GO:0043233	5.66228e-10	3.60303	12.4192	38	384	organelle lumen	6	CC
GO:0000003	6.49068e-10	3.09297	18.5045	48	632	reproduction	6	BP
GO:0006325	8.88415e-10	5.05399	5.91441	25	202	chromatin organization	6	BP
GO:0006397	1.21499e-09	7.84205	2.72297	17	93	mRNA processing	6	BP
GO:0006310	1.44468e-09	7.73935	2.75225	17	94	DNA recombination	6	BP
GO:0048831	2.02845e-09	7.54173	2.81081	17	96	regulation of shoot development	6	BP
GO:0043170	2.38182e-09	2.08271	119.02	167	4065	macromolecule metabolic process	6	BP
GO:0008213	4.56222e-09	7.08887	2.95721	17	101	protein alkylation	6	BP
GO:0006479	4.56222e-09	7.08887	2.95721	17	101	protein methylation	6	BP
GO:0006260	6.38209e-09	6.02469	3.80631	19	130	DNA replication	6	BP
GO:0016569	1.06683e-08	5.81253	3.92342	19	134	covalent chromatin modification	6	BP
GO:0006974	1.57585e-08	5.08276	4.88964	21	167	response to DNA damage stimulus	6	BP
GO:0044237	2.35273e-08	2.11664	164.286	207	5611	cellular metabolic process	6	BP
GO:0005739	2.65426e-08	2.03186	61.5462	102	1903	mitochondrion	6	CC
GO:0022414	3.10653e-08	2.85647	17.5383	43	599	reproductive process	6	BP
GO:0016071	3.48983e-08	5.06839	4.65541	20	159	mRNA metabolic process	6	BP
GO:0005654	3.71134e-08	5.33999	4.23676	19	131	nucleoplasm	6	CC
GO:0032501	3.92319e-08	2.38714	30.8604	62	1054	multicellular organismal process	6	BP
GO:0006342	4.45325e-08	9.63165	1.61036	12	55	chromatin silencing	6	BP
GO:0044451	5.02328e-08	5.54202	3.881	18	120	nucleoplasm part	6	CC
GO:0006281	6.21146e-08	5.13322	4.36261	19	149	DNA repair	6	BP
GO:0045814	6.81362e-08	9.20153	1.66892	12	57	negative regulation of gene expression, epigenetic	6	BP
GO:0003006	8.34773e-08	2.93907	14.9324	38	510	developmental process involved in reproduction	6	BP
GO:0016570	1.36427e-07	5.44775	3.68919	17	126	histone modification	6	BP
GO:0044424	2.21689e-07	3.28485	271.185	298	8385	intracellular part	6	CC
GO:0016571	2.60358e-07	6.46919	2.60586	14	89	histone methylation	6	BP
GO:0005622	2.78756e-07	3.37006	272.996	299	8441	intracellular	6	CC
GO:0009791	3.43403e-07	2.72318	16.4257	39	561	post-embryonic development	6	BP
GO:0007275	4.69872e-07	2.28355	28.5473	56	975	multicellular organismal development	6	BP
GO:0043566	4.79594e-07	11.8531	1.01679	9	36	structure-specific DNA binding	6	MF
GO:0008094	5.05715e-07	14.9251	0.762593	8	27	DNA-dependent ATPase activity	6	MF
GO:0040029	5.34178e-07	5.20397	3.60135	16	123	regulation of gene expression, epigenetic	6	BP
GO:0007127	7.80851e-07	9.26318	1.37613	10	47	meiosis I	6	BP
GO:0048608	8.13201e-07	2.91745	12.473	32	426	reproductive structure development	6	BP
GO:0034968	8.55714e-07	7.00721	2.07883	12	71	histone lysine methylation	6	BP
GO:0090305	9.52382e-07	4.66622	4.21622	17	144	nucleic acid phosphodiester bond hydrolysis	6	BP
GO:0008168	9.95152e-07	4.0185	5.70533	20	202	methyltransferase activity	6	MF
GO:0006305	1.4334e-06	8.56559	1.46396	10	50	DNA alkylation	6	BP
GO:0006306	1.4334e-06	8.56559	1.46396	10	50	DNA methylation	6	BP
GO:0016741	1.4651e-06	3.90877	5.84655	20	207	transferase activity, transferring one-carbon groups	6	MF
GO:0006304	2.09628e-06	8.15589	1.52252	10	52	DNA modification	6	BP
GO:0051567	2.64757e-06	9.31612	1.22973	9	42	histone H3-K9 methylation	6	BP
GO:0035825	3.26352e-06	9.04111	1.25901	9	43	reciprocal DNA recombination	6	BP
GO:0007131	3.26352e-06	9.04111	1.25901	9	43	reciprocal meiotic recombination	6	BP
GO:0000278	3.42048e-06	4.72569	3.65991	15	125	mitotic cell cycle	6	BP
GO:0032502	3.5659e-06	2.11807	30.4212	56	1039	developmental process	6	BP
GO:0000398	3.99872e-06	8.78182	1.28829	9	44	nuclear mRNA splicing, via spliceosome	6	BP
GO:0007049	4.00824e-06	3.27922	7.90541	23	270	cell cycle	6	BP
GO:0071842	4.40616e-06	2.17129	26.8491	51	917	cellular component organization at cellular level	6	BP
GO:0009987	4.41501e-06	2.05114	201.295	232	6875	cellular process	6	BP
GO:0009909	4.48391e-06	4.93822	3.27928	14	112	regulation of flower development	6	BP
GO:0016458	4.60944e-06	4.59868	3.74775	15	128	gene silencing	6	BP
GO:0006996	5.15101e-06	2.26321	22.5743	45	771	organelle organization	6	BP
GO:0045892	5.38091e-06	5.73372	2.45946	12	84	negative regulation of transcription, DNA-dependent	6	BP
GO:0071841	5.58155e-06	2.05784	32.4122	58	1107	cellular component organization or biogenesis at cellular level	6	BP
GO:0051321	5.96592e-06	6.29141	2.07883	11	71	meiotic cell cycle	6	BP
GO:0044238	5.98515e-06	1.79808	162.236	197	5541	primary metabolic process	6	BP
GO:0003697	6.67843e-06	17.5948	0.508395	6	18	single-stranded DNA binding	6	MF
GO:0051253	6.91173e-06	5.57751	2.51802	12	86	negative regulation of RNA metabolic process	6	BP
GO:0006346	6.96916e-06	12.5097	0.761261	7	26	methylation-dependent chromatin silencing	6	BP
GO:0051327	8.125e-06	6.84487	1.75676	10	60	M phase of meiotic cell cycle	6	BP
GO:0007126	8.125e-06	6.84487	1.75676	10	60	meiosis	6	BP
GO:0032991	8.69771e-06	1.92158	39.7802	67	1230	macromolecular complex	6	CC
GO:0032504	9.87716e-06	4.92308	3.04505	13	104	multicellular organism reproduction	6	BP
GO:0034654	1.19694e-05	2.00867	32.4414	57	1108	nucleobase-containing biosynthetic process	6	BP
GO:0009451	1.36348e-05	3.9341	4.59685	16	157	RNA modification	6	BP
GO:0043234	1.42127e-05	2.06993	27.1023	50	838	protein complex	6	CC
GO:0004518	1.50905e-05	4.70766	3.16335	13	112	nuclease activity	6	MF
GO:0048856	1.54557e-05	2.10465	25.795	48	881	anatomical structure development	6	BP
GO:0022403	1.65673e-05	4.66406	3.19144	13	109	cell cycle phase	6	BP
GO:0000375	1.69025e-05	7.14165	1.52252	9	52	RNA splicing, via transesterification reactions	6	BP
GO:0000377	1.69025e-05	7.14165	1.52252	9	52	RNA splicing, via transesterification reactions with bulged adenosine as nucleophile	6	BP
GO:0006351	1.70175e-05	2.06627	27.4054	50	936	transcription, DNA-dependent	6	BP
GO:0022621	1.84032e-05	2.88104	9.28153	24	317	shoot system development	6	BP
GO:0048367	1.84032e-05	2.88104	9.28153	24	317	shoot development	6	BP
GO:0045934	1.95458e-05	4.96773	2.78153	12	95	negative regulation of nucleobase-containing compound metabolic process	6	BP
GO:0072527	1.95458e-05	4.96773	2.78153	12	95	pyrimidine-containing compound metabolic process	6	BP
GO:0043933	2.00185e-05	2.45729	14.5225	32	496	macromolecular complex subunit organization	6	BP
GO:0008380	2.01972e-05	4.56786	3.25	13	111	RNA splicing	6	BP
GO:0032774	2.08124e-05	2.04832	27.6104	50	943	RNA biosynthetic process	6	BP
GO:2000241	2.13457e-05	4.23755	3.74775	14	128	regulation of reproductive process	6	BP
GO:2000024	2.48333e-05	Inf	0.0878378	3	3	regulation of leaf development	6	BP
GO:2000026	2.53016e-05	3.40166	5.91441	18	202	regulation of multicellular organismal development	6	BP
GO:0051172	2.68672e-05	4.79284	2.86937	12	98	negative regulation of nitrogen compound metabolic process	6	BP
GO:0031047	2.69479e-05	4.43069	3.33784	13	114	gene silencing by RNA	6	BP
GO:0051239	2.7042e-05	3.38289	5.94369	18	203	regulation of multicellular organismal process	6	BP
GO:0048444	2.90124e-05	7.7766	1.25901	8	43	floral organ morphogenesis	6	BP
GO:0048563	2.90124e-05	7.7766	1.25901	8	43	post-embryonic organ morphogenesis	6	BP
GO:2000113	2.97879e-05	4.73722	2.89865	12	99	negative regulation of cellular macromolecule biosynthetic process	6	BP
GO:0031324	3.18004e-05	3.83979	4.39189	15	150	negative regulation of cellular metabolic process	6	BP
GO:0010558	3.29808e-05	4.68286	2.92793	12	100	negative regulation of macromolecule biosynthetic process	6	BP
GO:0009220	3.74691e-05	5.60369	2.07883	10	71	pyrimidine ribonucleotide biosynthetic process	6	BP
GO:0009218	3.74691e-05	5.60369	2.07883	10	71	pyrimidine ribonucleotide metabolic process	6	BP
GO:0048645	4.09924e-05	7.35461	1.31757	8	45	organ formation	6	BP
GO:0000280	4.30963e-05	4.95807	2.5473	11	87	nuclear division	6	BP
GO:0022402	4.56316e-05	3.52683	5.06532	16	173	cell cycle process	6	BP
GO:0034645	4.58389e-05	1.76962	49.6577	76	1696	cellular macromolecule biosynthetic process	6	BP
GO:0031124	4.58676e-05	33.632	0.234234	4	8	mRNA 3'-end processing	6	BP
GO:0007276	4.82571e-05	6.13705	1.72748	9	59	gamete generation	6	BP
GO:0048731	5.31071e-05	2.21036	18.0946	36	618	system development	6	BP
GO:0048610	5.83744e-05	3.82883	4.0991	14	140	cellular process involved in reproduction	6	BP
GO:0072528	5.92398e-05	4.76819	2.63514	11	90	pyrimidine-containing compound biosynthetic process	6	BP
GO:0048285	6.48783e-05	4.33442	3.13288	12	107	organelle fission	6	BP
GO:0031327	6.48783e-05	4.33442	3.13288	12	107	negative regulation of cellular biosynthetic process	6	BP
GO:0003899	6.57964e-05	8.22713	1.04504	7	37	DNA-directed RNA polymerase activity	6	MF
GO:0009059	6.60179e-05	1.74593	50.1847	76	1714	macromolecule biosynthetic process	6	BP
GO:0071704	7.6215e-05	1.65151	160.655	191	5487	organic substance metabolic process	6	BP
GO:0022412	7.7493e-05	6.63415	1.43468	8	49	cellular process involved in reproduction in multicellular organism	6	BP
GO:0007292	7.7493e-05	6.63415	1.43468	8	49	female gamete generation	6	BP
GO:0009560	7.7493e-05	6.63415	1.43468	8	49	embryo sac egg cell differentiation	6	BP
GO:0009890	7.78641e-05	4.2441	3.19144	12	109	negative regulation of biosynthetic process	6	BP
GO:0004527	7.87325e-05	7.96082	1.07328	7	38	exonuclease activity	6	MF
GO:0000279	8.03199e-05	4.59221	2.72297	11	93	M phase	6	BP
GO:0048449	8.27678e-05	7.91316	1.08333	7	37	floral organ formation	6	BP
GO:0018130	8.49297e-05	1.82714	37.1554	60	1269	heterocycle biosynthetic process	6	BP
GO:0005488	8.54022e-05	1.7238	163.986	192	5806	binding	6	MF
GO:0035194	9.30742e-05	5.57603	1.87387	9	64	posttranscriptional gene silencing by RNA	6	BP
GO:0051052	9.30742e-05	5.57603	1.87387	9	64	regulation of DNA metabolic process	6	BP
GO:0005730	0.000100329	3.14445	5.98321	17	185	nucleolus	6	CC
GO:0001510	0.000105307	5.47585	1.90315	9	65	RNA methylation	6	BP
GO:0006220	0.000105979	4.87833	2.34234	10	80	pyrimidine nucleotide metabolic process	6	BP
GO:0006221	0.000105979	4.87833	2.34234	10	80	pyrimidine nucleotide biosynthetic process	6	BP
GO:0009908	0.000113371	2.89469	7.23198	19	247	flower development	6	BP
GO:0048580	0.000115099	3.56997	4.36261	14	149	regulation of post-embryonic development	6	BP
GO:0010629	0.000115976	3.23299	5.47523	16	187	negative regulation of gene expression	6	BP
GO:0010388	0.000117613	7.41694	1.14189	7	39	cullin deneddylation	6	BP
GO:0000338	0.000117613	7.41694	1.14189	7	39	protein deneddylation	6	BP
GO:0048609	0.000118173	4.37666	2.84009	11	97	multicellular organismal reproductive process	6	BP
GO:0016441	0.00011886	5.37919	1.93243	9	66	posttranscriptional gene silencing	6	BP
GO:0006275	0.000139039	7.19139	1.17117	7	40	regulation of DNA replication	6	BP
GO:0071103	0.00015037	5.19569	1.99099	9	68	DNA conformation change	6	BP
GO:0034062	0.000152848	7.04777	1.18626	7	42	RNA polymerase activity	6	MF
GO:0010605	0.000157881	3.01587	6.20721	17	212	negative regulation of macromolecule metabolic process	6	BP
GO:0070192	0.000160546	8.82071	0.849099	6	29	chromosome organization involved in meiosis	6	BP
GO:0007129	0.000160546	8.82071	0.849099	6	29	synapsis	6	BP
GO:0051301	0.000178089	3.1034	5.68018	16	194	cell division	6	BP
GO:0050793	0.000190918	2.86012	6.90991	18	236	regulation of developmental process	6	BP
GO:0010228	0.000196893	3.80715	3.51351	12	120	vegetative to reproductive phase transition of meristem	6	BP
GO:0009561	0.000210498	4.94263	2.07883	9	71	megagametogenesis	6	BP
GO:0016273	0.000213509	52.2131	0.141221	3	5	arginine N-methyltransferase activity	6	MF
GO:0016274	0.000213509	52.2131	0.141221	3	5	protein-arginine N-methyltransferase activity	6	MF
GO:0016779	0.00023959	3.71858	3.58701	12	127	nucleotidyltransferase activity	6	MF
GO:0004003	0.000257258	17.462	0.33893	4	12	ATP-dependent DNA helicase activity	6	MF
GO:0006302	0.000258598	6.4111	1.28829	7	44	double-strand break repair	6	BP
GO:0017038	0.000268096	3.66954	3.63063	12	124	protein import	6	BP
GO:0048229	0.000268544	3.11187	5.29955	15	181	gametophyte development	6	BP
GO:0016817	0.000273197	2.22471	13.8114	28	489	hydrolase activity, acting on acid anhydrides	6	MF
GO:0000724	0.000284494	7.80035	0.936937	6	32	double-strand break repair via homologous recombination	6	BP
GO:0000725	0.000284494	7.80035	0.936937	6	32	recombinational repair	6	BP
GO:0009892	0.000303069	2.74392	7.17342	18	245	negative regulation of metabolic process	6	BP
GO:0009640	0.000320575	4.64101	2.19595	9	75	photomorphogenesis	6	BP
GO:0006261	0.000320575	4.64101	2.19595	9	75	DNA-dependent DNA replication	6	BP
GO:0016604	0.000335823	7.60703	0.97025	6	30	nuclear body	6	CC
GO:0000228	0.000335823	7.60703	0.97025	6	30	nuclear chromosome	6	CC
GO:0006913	0.000354489	4.57123	2.22523	9	76	nucleocytoplasmic transport	6	BP
GO:0051169	0.000354489	4.57123	2.22523	9	76	nuclear transport	6	BP
GO:0071840	0.000358272	1.70281	40.8153	62	1394	cellular component organization or biogenesis	6	BP
GO:0016462	0.000370547	2.21164	13.3595	27	473	pyrophosphatase activity	6	MF
GO:0009887	0.000391662	3.75805	3.25	11	111	organ morphogenesis	6	BP
GO:0017111	0.000410481	2.23079	12.7381	26	451	nucleoside-triphosphatase activity	6	MF
GO:0033554	0.000411276	2.30688	11.3311	24	387	cellular response to stress	6	BP
GO:0017069	0.000418101	34.8048	0.169465	3	6	snRNA binding	6	MF
GO:0016796	0.000418101	34.8048	0.169465	3	6	exonuclease activity, active with either ribo- or deoxyribonucleic acids and producing 5'-phosphomonoesters	6	MF
GO:0009933	0.000418214	5.02977	1.81532	8	62	meristem structural organization	6	BP
GO:0070828	0.000465036	33.5111	0.175676	3	6	heterochromatin organization	6	BP
GO:0031507	0.000465036	33.5111	0.175676	3	6	heterochromatin formation	6	BP
GO:0016818	0.000466611	2.17563	13.5572	27	480	hydrolase activity, acting on acid anhydrides, in phosphorus-containing anhydrides	6	MF
GO:0003690	0.000472802	9.21581	0.677861	5	24	double-stranded DNA binding	6	MF
GO:0033044	0.000473401	6.99109	1.02477	6	35	regulation of chromosome organization	6	BP
GO:0010182	0.000473401	6.99109	1.02477	6	35	sugar mediated signaling pathway	6	BP
GO:0009756	0.000473401	6.99109	1.02477	6	35	carbohydrate mediated signaling	6	BP
GO:0019953	0.000474441	4.37386	2.31306	9	79	sexual reproduction	6	BP
GO:0009259	0.000480379	2.20161	12.8536	26	439	ribonucleotide metabolic process	6	BP
GO:0048532	0.000520544	4.84906	1.87387	8	64	anatomical structure arrangement	6	BP
GO:0044271	0.000556705	1.66334	42.3378	63	1446	cellular nitrogen compound biosynthetic process	6	BP
GO:0006338	0.000570604	13.4439	0.40991	4	14	chromatin remodeling	6	BP
GO:0019693	0.000594121	2.20323	12.3266	25	421	ribose phosphate metabolic process	6	BP
GO:0000793	0.000608819	13.4574	0.420442	4	13	condensed chromosome	6	CC
GO:0005681	0.000608819	13.4574	0.420442	4	13	spliceosomal complex	6	CC
GO:0005849	0.000623195	30.2006	0.19405	3	6	mRNA cleavage factor complex	6	CC
GO:0032300	0.000623195	30.2006	0.19405	3	6	mismatch repair complex	6	CC
GO:0051726	0.000661168	3.50945	3.45495	11	118	regulation of cell cycle	6	BP
GO:0016043	0.000748578	1.68947	36.0428	55	1231	cellular component organization	6	BP
GO:0006014	0.000780833	2.15761	12.5608	25	429	D-ribose metabolic process	6	BP
GO:0019321	0.000794387	2.12076	13.2928	26	454	pentose metabolic process	6	BP
GO:0008173	0.000837976	7.95637	0.762593	5	27	RNA methyltransferase activity	6	MF
GO:0048530	0.000854228	Inf	0.0585586	2	2	fruit morphogenesis	6	BP
GO:0044283	0.00086078	1.60179	48.223	69	1647	small molecule biosynthetic process	6	BP
GO:0003678	0.000865122	11.636	0.451907	4	16	DNA helicase activity	6	MF
GO:0046930	0.000877519	7.9856	0.7762	5	24	pore complex	6	CC
GO:0006606	0.000931493	5.04143	1.58108	7	54	protein import into nucleus	6	BP
GO:0051170	0.000931493	5.04143	1.58108	7	54	nuclear import	6	BP
GO:0016246	0.000931493	5.04143	1.58108	7	54	RNA interference	6	BP
GO:0071322	0.000990418	5.95968	1.17117	6	40	cellular response to carbohydrate stimulus	6	BP
GO:0034504	0.00104112	4.93586	1.61036	7	55	protein localization to nucleus	6	BP
GO:0005712	0.00104274	Inf	0.0646833	2	2	chiasma	6	CC
GO:0044454	0.0010682	7.5855	0.808542	5	25	nuclear chromosome part	6	CC
GO:0030983	0.00112239	20.8781	0.225954	3	8	mismatched DNA binding	6	MF
GO:0009555	0.00113161	3.50986	3.13288	10	107	pollen development	6	BP
GO:0031048	0.00117261	7.32317	0.81982	5	28	chromatin silencing by small RNA	6	BP
GO:0008170	0.00117719	7.29167	0.819082	5	29	N-methyltransferase activity	6	MF
GO:0043227	0.00118789	1.61606	244.568	266	7562	membrane-bounded organelle	6	CC
GO:0043231	0.00118789	1.61606	244.568	266	7562	intracellular membrane-bounded organelle	6	CC
GO:0006298	0.00124641	20.1022	0.234234	3	8	mismatch repair	6	BP
GO:0031123	0.00126577	10.338	0.497748	4	17	RNA 3'-end processing	6	BP
GO:0048523	0.00128162	2.54648	6.79279	16	232	negative regulation of cellular process	6	BP
GO:0048513	0.00142415	1.94987	16.0743	29	549	organ development	6	BP
GO:0005643	0.0014351	10.0898	0.517467	4	16	nuclear pore	6	CC
GO:0007059	0.00146184	5.47464	1.25901	6	43	chromosome segregation	6	BP
GO:0019219	0.00149798	1.72723	27.1419	43	927	regulation of nucleobase-containing compound metabolic process	6	BP
GO:0008757	0.00156717	4.55803	1.7229	7	61	S-adenosylmethionine-dependent methyltransferase activity	6	MF
GO:0019438	0.00161275	1.61235	38.9414	57	1330	aromatic compound biosynthetic process	6	BP
GO:0000794	0.00166254	18.1165	0.258733	3	8	condensed nuclear chromosome	6	CC
GO:0000418	0.00166254	18.1165	0.258733	3	8	DNA-directed RNA polymerase IV complex	6	CC
GO:0070646	0.00175008	4.46773	1.75676	7	60	protein modification by small protein removal	6	BP
GO:0048646	0.00178425	3.92978	2.2545	8	77	anatomical structure formation involved in morphogenesis	6	BP
GO:0003677	0.00183419	1.71119	27.4816	43	973	DNA binding	6	MF
GO:0051171	0.00192304	1.7016	27.4932	43	939	regulation of nitrogen compound metabolic process	6	BP
GO:0070647	0.00192997	2.52137	6.41216	15	219	protein modification by small protein conjugation or removal	6	BP
GO:0033043	0.00193888	3.87321	2.28378	8	78	regulation of organelle organization	6	BP
GO:0009553	0.00194095	3.51254	2.81081	9	96	embryo sac development	6	BP
GO:0009790	0.00196609	2.72638	5.15315	13	176	embryo development	6	BP
GO:0032392	0.00196846	8.95762	0.556306	4	19	DNA geometric change	6	BP
GO:0032508	0.00196846	8.95762	0.556306	4	19	DNA duplex unwinding	6	BP
GO:0006312	0.00196846	8.95762	0.556306	4	19	mitotic recombination	6	BP
GO:2000112	0.00212851	1.70106	26.8198	42	916	regulation of cellular macromolecule biosynthetic process	6	BP
GO:0010556	0.00217263	1.69891	26.8491	42	917	regulation of macromolecule biosynthetic process	6	BP
GO:0043226	0.00221277	1.60404	251.715	271	7783	organelle	6	CC
GO:0043229	0.00221277	1.60404	251.715	271	7783	intracellular organelle	6	CC
GO:0031326	0.00221694	1.68696	27.6982	43	946	regulation of cellular biosynthetic process	6	BP
GO:0044249	0.00228375	1.45689	78.205	100	2671	cellular biosynthetic process	6	BP
GO:0016607	0.00229271	8.64657	0.58215	4	18	nuclear speck	6	CC
GO:0008174	0.0023395	69.3492	0.0847326	2	3	mRNA methyltransferase activity	6	MF
GO:0010468	0.00238044	1.66151	29.455	45	1006	regulation of gene expression	6	BP
GO:0009889	0.0024019	1.67869	27.8153	43	950	regulation of biosynthetic process	6	BP
GO:0007267	0.00240456	8.39684	0.585586	4	20	cell-cell signaling	6	BP
GO:0019013	0.00251024	6.06515	0.97025	5	30	viral nucleocapsid	6	CC
GO:0000245	0.00251302	66.7897	0.0878378	2	3	spliceosome assembly	6	BP
GO:0045292	0.00251302	66.7897	0.0878378	2	3	nuclear mRNA cis splicing, via spliceosome	6	BP
GO:2000027	0.00251302	66.7897	0.0878378	2	3	regulation of organ morphogenesis	6	BP
GO:0006370	0.00251302	66.7897	0.0878378	2	3	mRNA capping	6	BP
GO:0006376	0.00251302	66.7897	0.0878378	2	3	mRNA splice site selection	6	BP
GO:0003684	0.00254581	8.20894	0.593128	4	21	damaged DNA binding	6	MF
GO:0009410	0.00255698	14.3556	0.292793	3	10	response to xenobiotic stimulus	6	BP
GO:0048573	0.00260468	4.82022	1.40541	6	48	photoperiodism, flowering	6	BP
GO:0010564	0.00260468	4.82022	1.40541	6	48	regulation of cell cycle process	6	BP
GO:0048507	0.00285042	3.06238	3.54279	10	121	meristem development	6	BP
GO:0019028	0.00291505	5.83125	1.00259	5	31	viral capsid	6	CC
GO:0051252	0.00306066	1.69338	24.8874	39	850	regulation of RNA metabolic process	6	BP
GO:0033588	0.00306119	60.2194	0.097025	2	3	Elongator holoenzyme complex	6	CC
GO:0030532	0.00306119	60.2194	0.097025	2	3	small nuclear ribonucleoprotein complex	6	CC
GO:0009886	0.00314717	3.24843	3.01577	9	103	post-embryonic morphogenesis	6	BP
GO:0060255	0.00322296	1.60825	32.4414	48	1108	regulation of macromolecule metabolic process	6	BP
GO:0022611	0.00327805	5.61007	1.02477	5	35	dormancy process	6	BP
GO:0010162	0.00327805	5.61007	1.02477	5	35	seed dormancy	6	BP
GO:0009165	0.00334294	2.55086	5.47523	13	187	nucleotide biosynthetic process	6	BP
GO:0005635	0.00336499	5.61467	1.03493	5	32	nuclear envelope	6	CC
GO:0016272	0.00339487	12.9376	0.323417	3	10	prefoldin complex	6	CC
GO:0009260	0.00360882	2.95454	3.65991	10	125	ribonucleotide biosynthetic process	6	BP
GO:0009648	0.00392049	4.39912	1.52252	6	52	photoperiodism	6	BP
GO:0006399	0.00404384	2.90338	3.71847	10	127	tRNA metabolic process	6	BP
GO:0004536	0.00405458	11.5936	0.33893	3	12	deoxyribonuclease activity	6	MF
GO:0016887	0.00410756	2.39251	6.27021	14	222	ATPase activity	6	MF
GO:0006355	0.00431074	1.66547	24.5653	38	839	regulation of transcription, DNA-dependent	6	BP
GO:0004519	0.00439729	3.72414	2.06183	7	73	endonuclease activity	6	MF
GO:0019012	0.00441116	5.22633	1.09962	5	34	virion	6	CC
GO:0044423	0.00441116	5.22633	1.09962	5	34	virion part	6	CC
GO:0045787	0.00448844	11.163	0.351351	3	12	positive regulation of cell cycle	6	BP
GO:0000790	0.00455702	11.3192	0.355758	3	11	nuclear chromatin	6	CC
GO:0043141	0.00459177	34.6706	0.112977	2	4	ATP-dependent 5'-3' DNA helicase activity	6	MF
GO:0043139	0.00459177	34.6706	0.112977	2	4	5'-3' DNA helicase activity	6	MF
GO:0000175	0.00459177	34.6706	0.112977	2	4	3'-5'-exoribonuclease activity	6	MF
GO:0045132	0.00481067	6.7145	0.702703	4	24	meiotic chromosome segregation	6	BP
GO:0051128	0.00487939	3.02093	3.22072	9	110	regulation of cellular component organization	6	BP
GO:0035246	0.00492886	33.3911	0.117117	2	4	peptidyl-arginine N-methylation	6	BP
GO:0048235	0.00492886	33.3911	0.117117	2	4	pollen sperm cell differentiation	6	BP
GO:0018195	0.00492886	33.3911	0.117117	2	4	peptidyl-arginine modification	6	BP
GO:0018216	0.00492886	33.3911	0.117117	2	4	peptidyl-arginine methylation	6	BP
GO:0006378	0.00492886	33.3911	0.117117	2	4	mRNA polyadenylation	6	BP
GO:0009314	0.00516624	1.9607	11.4189	21	390	response to radiation	6	BP
GO:0042138	0.00559726	6.39405	0.731982	4	25	meiotic DNA double-strand break formation	6	BP
GO:0080090	0.00580977	1.55778	32.5878	47	1113	regulation of primary metabolic process	6	BP
GO:0000428	0.00584213	6.36774	0.743858	4	23	DNA-directed RNA polymerase complex	6	CC
GO:0055029	0.00584213	6.36774	0.743858	4	23	nuclear DNA-directed RNA polymerase complex	6	CC
GO:0030880	0.00584213	6.36774	0.743858	4	23	RNA polymerase complex	6	CC
GO:0010431	0.005901	4.80597	1.17117	5	40	seed maturation	6	BP
GO:0019915	0.00646526	6.10274	0.761261	4	26	lipid storage	6	BP
GO:0010332	0.00646526	6.10274	0.761261	4	26	response to gamma radiation	6	BP
GO:0050826	0.00646526	6.10274	0.761261	4	26	response to freezing	6	BP
GO:0008276	0.00653811	6.0633	0.762593	4	27	protein methyltransferase activity	6	MF
GO:0010608	0.00687755	2.67178	4.01126	10	137	posttranscriptional regulation of gene expression	6	BP
GO:0033365	0.0068776	2.41638	5.29955	12	181	protein localization to organelle	6	BP
GO:0034655	0.00704585	1.97064	10.2477	19	350	nucleobase-containing catabolic process	6	BP
GO:0016573	0.00711144	9.13131	0.40991	3	14	histone acetylation	6	BP
GO:0018393	0.00711144	9.13131	0.40991	3	14	internal peptidyl-lysine acetylation	6	BP
GO:0018394	0.00711144	9.13131	0.40991	3	14	peptidyl-lysine acetylation	6	BP
GO:0006473	0.00711144	9.13131	0.40991	3	14	protein acetylation	6	BP
GO:0006475	0.00711144	9.13131	0.40991	3	14	internal protein amino acid acetylation	6	BP
GO:0008033	0.00732216	3.81514	1.72748	6	59	tRNA processing	6	BP
GO:0060249	0.00741808	5.83675	0.790541	4	27	anatomical structure homeostasis	6	BP
GO:0032200	0.00741808	5.83675	0.790541	4	27	telomere organization	6	BP
GO:0000723	0.00741808	5.83675	0.790541	4	27	telomere maintenance	6	BP
GO:0004532	0.00751061	23.1111	0.141221	2	5	exoribonuclease activity	6	MF
GO:0016896	0.00751061	23.1111	0.141221	2	5	exoribonuclease activity, producing 5'-phosphomonoesters	6	MF
GO:0004386	0.00763616	3.02334	2.85266	8	101	helicase activity	6	MF
GO:0005694	0.0077083	2.79966	3.46056	9	107	chromosome	6	CC
GO:0010026	0.00804113	4.42508	1.25901	5	43	trichome differentiation	6	BP
GO:0043631	0.00805632	22.2583	0.146396	2	5	RNA polyadenylation	6	BP
GO:0043967	0.00805632	22.2583	0.146396	2	5	histone H4 acetylation	6	BP
GO:0051205	0.00805632	22.2583	0.146396	2	5	protein insertion into membrane	6	BP
GO:0051668	0.00805632	22.2583	0.146396	2	5	localization within membrane	6	BP
GO:0055046	0.00805632	22.2583	0.146396	2	5	microgametogenesis	6	BP
GO:0046390	0.00810274	2.77097	3.48423	9	119	ribose phosphate biosynthetic process	6	BP
GO:0019302	0.00810274	2.77097	3.48423	9	119	D-ribose biosynthetic process	6	BP
GO:0016482	0.00810487	2.27077	6.09009	13	208	cytoplasmic transport	6	BP
GO:0007062	0.00845899	5.59294	0.81982	4	28	sister chromatid cohesion	6	BP
GO:0035195	0.00886027	4.31114	1.28829	5	44	gene silencing by miRNA	6	BP
GO:0006333	0.00886027	4.31114	1.28829	5	44	chromatin assembly or disassembly	6	BP
GO:0009058	0.00897729	1.36904	81.6014	100	2787	biosynthetic process	6	BP
GO:0019322	0.0089996	2.72088	3.54279	9	121	pentose biosynthetic process	6	BP
GO:0031323	0.00913814	1.51259	33.4077	47	1141	regulation of cellular metabolic process	6	BP
GO:0005829	0.00915497	1.56466	26.5202	39	820	cytosol	6	CC
GO:0004540	0.00921026	4.25997	1.29923	5	46	ribonuclease activity	6	MF
GO:0007389	0.00938289	3.19239	2.37162	7	81	pattern specification process	6	BP
GO:0008408	0.00949475	8.02268	0.451907	3	16	3'-5' exonuclease activity	6	MF
GO:0070035	0.00982499	3.55932	1.83587	6	65	purine NTP-dependent helicase activity	6	MF
GO:0008026	0.00982499	3.55932	1.83587	6	65	ATP-dependent helicase activity	6	MF
GO:0003723	3.58567e-31	7.41696	13.9498	70	477	RNA binding	7	MF
GO:0030529	5.19444e-31	6.99079	14.6804	72	419	ribonucleoprotein complex	7	CC
GO:0001510	6.46983e-31	32.161	2.11229	32	65	RNA methylation	7	BP
GO:0010467	6.76993e-30	4.07219	56.8044	142	1748	gene expression	7	BP
GO:0017038	1.8323e-28	15.5305	4.0296	39	124	protein import	7	BP
GO:0022613	7.80524e-28	9.92495	7.18179	49	221	ribonucleoprotein complex biogenesis	7	BP
GO:0043414	5.01431e-27	11.1822	5.81692	44	179	macromolecule methylation	7	BP
GO:0009451	2.46437e-26	12.0132	5.10199	41	157	RNA modification	7	BP
GO:0006412	1.61547e-25	6.22594	14.1686	64	436	translation	7	BP
GO:0006139	1.91404e-25	3.49922	72.5653	155	2233	nucleobase-containing compound metabolic process	7	BP
GO:0071843	8.49158e-25	7.43781	9.84653	53	303	cellular component biogenesis at cellular level	7	BP
GO:0072594	9.2124e-25	10.7026	5.55695	41	171	establishment of protein localization to organelle	7	BP
GO:0042254	4.42179e-24	9.46	6.43436	43	198	ribosome biogenesis	7	BP
GO:0033365	9.77307e-24	9.92696	5.88192	41	181	protein localization to organelle	7	BP
GO:0006606	1.68422e-23	27.8839	1.75483	25	54	protein import into nucleus	7	BP
GO:0051170	1.68422e-23	27.8839	1.75483	25	54	nuclear import	7	BP
GO:0034504	2.99883e-23	26.9514	1.78732	25	55	protein localization to nucleus	7	BP
GO:0034660	4.8817e-23	7.19991	9.45656	50	291	ncRNA metabolic process	7	BP
GO:0043228	7.78387e-23	4.37542	25.1214	82	717	non-membrane-bounded organelle	7	CC
GO:0043232	7.78387e-23	4.37542	25.1214	82	717	intracellular non-membrane-bounded organelle	7	CC
GO:0046483	1.05142e-22	3.2375	75.945	154	2337	heterocycle metabolic process	7	BP
GO:0006396	2.19652e-22	5.76731	13.7136	59	422	RNA processing	7	BP
GO:0016482	3.16361e-22	8.58399	6.75933	42	208	cytoplasmic transport	7	BP
GO:0006725	4.54796e-22	3.1723	77.7973	155	2394	cellular aromatic compound metabolic process	7	BP
GO:0005730	4.81165e-22	8.78613	6.48181	41	185	nucleolus	7	CC
GO:0071841	6.58877e-22	3.79596	35.9739	98	1107	cellular component organization or biogenesis at cellular level	7	BP
GO:0006605	6.88166e-22	8.37823	6.88932	42	212	protein targeting	7	BP
GO:0034641	1.09113e-21	3.10669	86.019	164	2647	cellular nitrogen compound metabolic process	7	BP
GO:0006913	1.422e-21	17.9122	2.46976	27	76	nucleocytoplasmic transport	7	BP
GO:0051169	1.422e-21	17.9122	2.46976	27	76	nuclear transport	7	BP
GO:0070013	3.30022e-21	5.57178	13.4541	57	384	intracellular organelle lumen	7	CC
GO:0043233	3.30022e-21	5.57178	13.4541	57	384	organelle lumen	7	CC
GO:0034470	5.73538e-21	8.09897	6.88932	41	212	ncRNA processing	7	BP
GO:0006807	5.84818e-21	3.03746	88.1638	165	2713	nitrogen compound metabolic process	7	BP
GO:0031974	8.12734e-21	5.45075	13.6994	57	391	membrane-enclosed lumen	7	CC
GO:0044260	2.17288e-20	2.9983	119.621	198	3681	cellular macromolecule metabolic process	7	BP
GO:0043170	3.80214e-20	3.02598	132.099	210	4065	macromolecule metabolic process	7	BP
GO:0032259	8.93964e-20	6.14785	10.269	48	316	methylation	7	BP
GO:0006886	9.44006e-20	6.43844	9.42407	46	290	intracellular protein transport	7	BP
GO:0003676	1.06198e-19	3.36734	49.9797	113	1709	nucleic acid binding	7	MF
GO:0034613	5.09486e-19	6.12825	9.81403	46	302	cellular protein localization	7	BP
GO:0031981	9.52917e-19	5.61192	11.2818	49	322	nuclear lumen	7	CC
GO:0006730	9.54672e-19	5.74907	10.8539	48	334	one-carbon metabolic process	7	BP
GO:0009220	1.04194e-18	16.4246	2.30727	24	71	pyrimidine ribonucleotide biosynthetic process	7	BP
GO:0009218	1.04194e-18	16.4246	2.30727	24	71	pyrimidine ribonucleotide metabolic process	7	BP
GO:0070727	1.94384e-18	5.89114	10.139	46	312	cellular macromolecule localization	7	BP
GO:0044428	1.73137e-17	4.88568	13.5242	52	386	nuclear part	7	CC
GO:0006220	2.45003e-17	13.7711	2.59974	24	80	pyrimidine nucleotide metabolic process	7	BP
GO:0006221	2.45003e-17	13.7711	2.59974	24	80	pyrimidine nucleotide biosynthetic process	7	BP
GO:0019693	1.20919e-16	4.73189	13.6811	51	421	ribose phosphate metabolic process	7	BP
GO:0044281	1.24009e-16	2.64107	105.68	175	3252	small molecule metabolic process	7	BP
GO:0016070	1.36253e-16	2.99304	46.9579	104	1445	RNA metabolic process	7	BP
GO:0090304	1.64526e-16	2.85973	56.0245	116	1724	nucleic acid metabolic process	7	BP
GO:0006626	1.73101e-16	23.6763	1.36486	18	42	protein targeting to mitochondrion	7	BP
GO:0072655	1.73101e-16	23.6763	1.36486	18	42	establishment of protein localization in mitochondrion	7	BP
GO:0070585	1.73101e-16	23.6763	1.36486	18	42	protein localization in mitochondrion	7	BP
GO:0006014	2.68423e-16	4.62746	13.9411	51	429	D-ribose metabolic process	7	BP
GO:0071840	2.97922e-16	2.9884	45.3005	101	1394	cellular component organization or biogenesis	7	BP
GO:0044085	4.63731e-16	3.90926	20.1155	62	619	cellular component biogenesis	7	BP
GO:0072528	4.9551e-16	11.6716	2.92471	24	90	pyrimidine-containing compound biosynthetic process	7	BP
GO:0007005	6.69594e-16	14.8539	2.14479	21	66	mitochondrion organization	7	BP
GO:0009259	7.06967e-16	4.50298	14.2661	51	439	ribonucleotide metabolic process	7	BP
GO:0072527	1.90434e-15	10.8436	3.08719	24	95	pyrimidine-containing compound metabolic process	7	BP
GO:0015031	2.12324e-15	4.59506	13.0962	48	403	protein transport	7	BP
GO:0046364	2.19428e-15	7.33624	5.49196	31	169	monosaccharide biosynthetic process	7	BP
GO:0046907	2.24243e-15	4.6733	12.6088	47	388	intracellular transport	7	BP
GO:0019321	2.85706e-15	4.32784	14.7535	51	454	pentose metabolic process	7	BP
GO:0006364	2.86116e-15	7.57475	5.16699	30	159	rRNA processing	7	BP
GO:0045184	3.45883e-15	4.52863	13.2587	48	408	establishment of protein localization	7	BP
GO:0046390	5.51988e-15	9.01083	3.86712	26	119	ribose phosphate biosynthetic process	7	BP
GO:0019302	5.51988e-15	9.01083	3.86712	26	119	D-ribose biosynthetic process	7	BP
GO:0009165	6.00638e-15	6.75424	6.0769	32	187	nucleotide biosynthetic process	7	BP
GO:0006839	6.98057e-15	17.7414	1.62484	18	50	mitochondrial transport	7	BP
GO:0019322	8.46489e-15	8.81915	3.93211	26	121	pentose biosynthetic process	7	BP
GO:0008104	9.83438e-15	4.38877	13.6162	48	419	protein localization	7	BP
GO:0016072	1.35724e-14	7.07358	5.45946	30	168	rRNA metabolic process	7	BP
GO:0009260	1.93847e-14	8.45903	4.0621	26	125	ribonucleotide biosynthetic process	7	BP
GO:0010388	2.00611e-14	21.81	1.26737	16	39	cullin deneddylation	7	BP
GO:0000338	2.00611e-14	21.81	1.26737	16	39	protein deneddylation	7	BP
GO:0005840	2.4223e-14	4.68308	11.3519	43	324	ribosome	7	CC
GO:0044238	3.22058e-14	2.72904	180.065	241	5541	primary metabolic process	7	BP
GO:0032991	1.06193e-13	2.72825	43.0953	93	1230	macromolecular complex	7	CC
GO:0033036	1.11846e-13	3.89107	16.1509	51	497	macromolecule localization	7	BP
GO:0003735	1.33659e-13	5.73711	7.19426	33	246	structural constituent of ribosome	7	MF
GO:0070035	1.99529e-13	13.5731	1.90092	18	65	purine NTP-dependent helicase activity	7	MF
GO:0008026	1.99529e-13	13.5731	1.90092	18	65	ATP-dependent helicase activity	7	MF
GO:0009553	2.5959e-13	9.4659	3.11969	22	96	embryo sac development	7	BP
GO:0009561	5.69799e-13	11.5392	2.30727	19	71	megagametogenesis	7	BP
GO:0009117	7.68412e-13	3.40981	20.5055	57	631	nucleotide metabolic process	7	BP
GO:0006753	8.21289e-13	3.40348	20.538	57	632	nucleoside phosphate metabolic process	7	BP
GO:0048284	1.09791e-12	33.7769	0.747426	12	23	organelle fusion	7	BP
GO:0000741	1.09791e-12	33.7769	0.747426	12	23	karyogamy	7	BP
GO:0009640	1.67601e-12	10.7102	2.43726	19	75	photomorphogenesis	7	BP
GO:0005622	1.81374e-12	6.99082	295.746	331	8441	intracellular	7	CC
GO:0006399	1.86454e-12	7.44796	4.12709	24	127	tRNA metabolic process	7	BP
GO:0071704	2.38254e-12	2.48005	178.31	235	5487	organic substance metabolic process	7	BP
GO:0044237	3.86252e-12	2.486	182.339	238	5611	cellular metabolic process	7	BP
GO:0005634	4.73887e-12	2.45371	51.1888	100	1461	nucleus	7	CC
GO:0009987	4.98166e-12	3.09948	223.415	271	6875	cellular process	7	BP
GO:0051649	6.95382e-12	3.63253	15.631	47	481	establishment of localization in cell	7	BP
GO:0005829	8.73247e-12	2.86582	28.7302	68	820	cytosol	7	CC
GO:0044424	1.00683e-11	5.68571	293.784	329	8385	intracellular part	7	CC
GO:0022412	1.9612e-11	13.7669	1.59234	15	49	cellular process involved in reproduction in multicellular organism	7	BP
GO:0007292	1.9612e-11	13.7669	1.59234	15	49	female gamete generation	7	BP
GO:0009560	1.9612e-11	13.7669	1.59234	15	49	embryo sac egg cell differentiation	7	BP
GO:0070646	4.28877e-11	11.3741	1.94981	16	60	protein modification by small protein removal	7	BP
GO:0051641	5.45759e-11	3.39351	16.5734	47	510	cellular localization	7	BP
GO:0004386	7.12722e-11	8.21232	2.95374	19	101	helicase activity	7	MF
GO:0005198	7.86968e-11	4.3948	9.0367	33	309	structural molecule activity	7	MF
GO:0006997	9.06951e-11	19.5377	1.0074	12	31	nucleus organization	7	BP
GO:0048609	2.13386e-10	7.6705	3.15219	19	97	multicellular organismal reproductive process	7	BP
GO:0008135	2.90491e-10	8.04536	2.83676	18	97	translation factor activity, nucleic acid binding	7	MF
GO:0030684	3.15095e-10	75.2	0.385405	8	11	preribosome	7	CC
GO:0046165	3.27319e-10	4.22972	9.00161	32	277	alcohol biosynthetic process	7	BP
GO:0008033	3.70086e-10	10.6262	1.91731	15	59	tRNA processing	7	BP
GO:0007276	3.70086e-10	10.6262	1.91731	15	59	gamete generation	7	BP
GO:0051168	4.7713e-10	16.1327	1.13739	12	35	nuclear export	7	BP
GO:0032504	7.47216e-10	7.03331	3.37967	19	104	multicellular organism reproduction	7	BP
GO:0071702	8.50143e-10	2.98028	19.8555	50	611	organic substance transport	7	BP
GO:0006406	1.1222e-09	17.8482	0.974903	11	30	mRNA export from nucleus	7	BP
GO:0044249	1.54382e-09	2.05487	86.7989	135	2671	cellular biosynthetic process	7	BP
GO:0071842	1.92884e-09	2.56418	29.7995	64	917	cellular component organization at cellular level	7	BP
GO:0019538	3.50135e-09	2.04017	80.722	127	2484	protein metabolic process	7	BP
GO:0006405	3.64351e-09	15.4092	1.07239	11	33	RNA export from nucleus	7	BP
GO:0048229	3.88287e-09	4.85665	5.88192	24	181	gametophyte development	7	BP
GO:0009639	4.01233e-09	5.88752	4.12709	20	127	response to red or far red light	7	BP
GO:0051028	5.23165e-09	14.7376	1.10489	11	34	mRNA transport	7	BP
GO:0005996	6.29996e-09	2.62977	25.0875	56	772	monosaccharide metabolic process	7	BP
GO:0044267	1.32544e-08	2.02623	70.1931	113	2160	cellular protein metabolic process	7	BP
GO:0051236	1.43285e-08	13.0328	1.20238	11	37	establishment of RNA localization	7	BP
GO:0050657	1.43285e-08	13.0328	1.20238	11	37	nucleic acid transport	7	BP
GO:0050658	1.43285e-08	13.0328	1.20238	11	37	RNA transport	7	BP
GO:0006403	1.43285e-08	13.0328	1.20238	11	37	RNA localization	7	BP
GO:0019637	1.81772e-08	2.48143	27.9472	59	860	organophosphate metabolic process	7	BP
GO:0006414	2.36049e-08	9.14585	1.85232	13	57	translational elongation	7	BP
GO:0019953	2.77866e-08	7.28923	2.56725	15	79	sexual reproduction	7	BP
GO:0009058	2.95344e-08	1.92984	90.5685	135	2787	biosynthetic process	7	BP
GO:0072521	3.07948e-08	3.11168	13.7461	37	423	purine-containing compound metabolic process	7	BP
GO:0006446	3.73916e-08	24.4366	0.584942	8	18	regulation of translational initiation	7	BP
GO:0006400	3.87429e-08	13.9606	1.0399	10	32	tRNA modification	7	BP
GO:0019013	3.92778e-08	14.1601	1.0511	10	30	viral nucleocapsid	7	CC
GO:0006996	4.14133e-08	2.51167	25.055	54	771	organelle organization	7	BP
GO:0030488	5.18401e-08	35.5321	0.422458	7	13	tRNA methylation	7	BP
GO:0019028	5.61941e-08	13.4843	1.08614	10	31	viral capsid	7	CC
GO:0016817	7.91355e-08	2.99834	14.3008	37	489	hydrolase activity, acting on acid anhydrides	7	MF
GO:0017111	9.94536e-08	3.06796	13.1895	35	451	nucleoside-triphosphatase activity	7	MF
GO:0016462	1.04521e-07	3.00959	13.8329	36	473	pyrophosphatase activity	7	MF
GO:0008213	1.37218e-07	5.86087	3.28218	16	101	protein alkylation	7	BP
GO:0006479	1.37218e-07	5.86087	3.28218	16	101	protein methylation	7	BP
GO:0006163	1.43816e-07	3.05852	12.7387	34	392	purine nucleotide metabolic process	7	BP
GO:0016818	1.51011e-07	2.95964	14.0376	36	480	hydrolase activity, acting on acid anhydrides, in phosphorus-containing anhydrides	7	MF
GO:0019012	1.51249e-07	11.795	1.19125	10	34	virion	7	CC
GO:0044423	1.51249e-07	11.795	1.19125	10	34	virion part	7	CC
GO:0006417	1.51522e-07	7.58517	2.14479	13	66	regulation of translation	7	BP
GO:0001731	3.17643e-07	23.6802	0.519949	7	16	formation of translation preinitiation complex	7	BP
GO:0034645	4.73915e-07	1.95087	55.1145	90	1696	cellular macromolecule biosynthetic process	7	BP
GO:0033290	5.30701e-07	21.853	0.560589	7	16	eukaryotic 48S preinitiation complex	7	CC
GO:0070993	5.30701e-07	21.853	0.560589	7	16	translation preinitiation complex	7	CC
GO:0005852	5.30701e-07	21.853	0.560589	7	16	eukaryotic translation initiation factor 3 complex	7	CC
GO:0016282	5.30701e-07	21.853	0.560589	7	16	eukaryotic 43S preinitiation complex	7	CC
GO:0008173	6.59261e-07	14.3835	0.789614	8	27	RNA methyltransferase activity	7	MF
GO:0046130	7.08508e-07	3.27045	9.39157	27	289	purine ribonucleoside catabolic process	7	BP
GO:0006152	7.58573e-07	3.25765	9.42407	27	290	purine nucleoside catabolic process	7	BP
GO:0009059	7.64978e-07	1.92456	55.6995	90	1714	macromolecule biosynthetic process	7	BP
GO:0009164	8.11888e-07	3.24494	9.45656	27	291	nucleoside catabolic process	7	BP
GO:0042454	8.11888e-07	3.24494	9.45656	27	291	ribonucleoside catabolic process	7	BP
GO:0016571	9.21037e-07	5.77827	2.89221	14	89	histone methylation	7	BP
GO:0090407	9.60221e-07	2.78972	13.8111	34	425	organophosphate biosynthetic process	7	BP
GO:0032040	1.01632e-06	69.8724	0.245258	5	7	small-subunit processome	7	CC
GO:0034655	1.05365e-06	2.98798	11.3739	30	350	nucleobase-containing catabolic process	7	BP
GO:0006066	1.09714e-06	2.18754	29.9295	57	921	alcohol metabolic process	7	BP
GO:0006413	1.13969e-06	6.84765	2.14479	12	66	translational initiation	7	BP
GO:0009154	1.29353e-06	3.15859	9.68404	27	298	purine ribonucleotide catabolic process	7	BP
GO:0009146	1.29353e-06	3.15859	9.68404	27	298	purine nucleoside triphosphate catabolic process	7	BP
GO:0009261	1.29353e-06	3.15859	9.68404	27	298	ribonucleotide catabolic process	7	BP
GO:0009203	1.29353e-06	3.15859	9.68404	27	298	ribonucleoside triphosphate catabolic process	7	BP
GO:0009207	1.29353e-06	3.15859	9.68404	27	298	purine ribonucleoside triphosphate catabolic process	7	BP
GO:0042623	1.30138e-06	4.3196	4.79617	18	164	ATPase activity, coupled	7	MF
GO:0015931	1.34852e-06	6.7224	2.17728	12	67	nucleobase-containing compound transport	7	BP
GO:0009143	1.38066e-06	3.14662	9.71654	27	299	nucleoside triphosphate catabolic process	7	BP
GO:0006195	1.47316e-06	3.13473	9.74903	27	300	purine nucleotide catabolic process	7	BP
GO:0009166	1.67552e-06	3.11123	9.81403	27	302	nucleotide catabolic process	7	BP
GO:0003743	1.73635e-06	7.28465	1.84243	11	63	translation initiation factor activity	7	MF
GO:0046434	1.78603e-06	3.0996	9.84653	27	303	organophosphate catabolic process	7	BP
GO:0010608	1.98688e-06	4.409	4.45206	17	137	posttranscriptional regulation of gene expression	7	BP
GO:0072523	2.02743e-06	3.0766	9.91152	27	305	purine-containing compound catabolic process	7	BP
GO:0048831	2.35257e-06	5.28087	3.11969	14	96	regulation of shoot development	7	BP
GO:0016741	2.51633e-06	3.76004	6.05371	20	207	transferase activity, transferring one-carbon groups	7	MF
GO:0046128	2.51922e-06	2.84927	11.8613	30	365	purine ribonucleoside metabolic process	7	BP
GO:0042278	2.66456e-06	2.84046	11.8938	30	366	purine nucleoside metabolic process	7	BP
GO:0022618	3.55589e-06	11.0928	0.974903	8	30	ribonucleoprotein complex assembly	7	BP
GO:0071826	3.55589e-06	11.0928	0.974903	8	30	ribonucleoprotein complex subunit organization	7	BP
GO:0009150	4.60773e-06	2.75519	12.2188	30	376	purine ribonucleotide metabolic process	7	BP
GO:0016043	5.02469e-06	1.95512	40.0035	68	1231	cellular component organization	7	BP
GO:0009116	5.20773e-06	2.68747	12.9337	31	398	nucleoside metabolic process	7	BP
GO:0005739	6.56786e-06	1.74919	66.675	100	1903	mitochondrion	7	CC
GO:0008168	6.7004e-06	3.63686	5.90748	19	202	methyltransferase activity	7	MF
GO:0016887	7.34446e-06	3.47472	6.49238	20	222	ATPase activity	7	MF
GO:0034637	8.21225e-06	2.62041	13.2262	31	407	cellular carbohydrate biosynthetic process	7	BP
GO:0008175	8.23722e-06	28.1783	0.321695	5	11	tRNA methyltransferase activity	7	MF
GO:0070647	8.50014e-06	3.31834	7.1168	21	219	protein modification by small protein conjugation or removal	7	BP
GO:0009119	8.62414e-06	2.65916	12.6088	30	388	ribonucleoside metabolic process	7	BP
GO:0009169	1.05844e-05	3.66068	5.55695	18	171	purine ribonucleoside monophosphate catabolic process	7	BP
GO:0009158	1.05844e-05	3.66068	5.55695	18	171	ribonucleoside monophosphate catabolic process	7	BP
GO:0009125	1.05844e-05	3.66068	5.55695	18	171	nucleoside monophosphate catabolic process	7	BP
GO:0009128	1.05844e-05	3.66068	5.55695	18	171	purine nucleoside monophosphate catabolic process	7	BP
GO:0009167	1.12528e-05	3.25116	7.24678	21	223	purine ribonucleoside monophosphate metabolic process	7	BP
GO:0009126	1.12528e-05	3.25116	7.24678	21	223	purine nucleoside monophosphate metabolic process	7	BP
GO:0048610	1.1657e-05	4	4.54955	16	140	cellular process involved in reproduction	7	BP
GO:0016051	1.19235e-05	2.52512	14.1361	32	435	carbohydrate biosynthetic process	7	BP
GO:0009144	1.24161e-05	2.75813	10.9189	27	336	purine nucleoside triphosphate metabolic process	7	BP
GO:0009205	1.24161e-05	2.75813	10.9189	27	336	purine ribonucleoside triphosphate metabolic process	7	BP
GO:0009123	1.30104e-05	3.1175	7.89672	22	243	nucleoside monophosphate metabolic process	7	BP
GO:0030154	1.36717e-05	3.01832	8.51416	23	262	cell differentiation	7	BP
GO:0007275	1.36775e-05	1.99879	31.6844	56	975	multicellular organismal development	7	BP
GO:0009909	1.47934e-05	4.41078	3.63964	14	112	regulation of flower development	7	BP
GO:0019439	1.56459e-05	2.56935	12.9987	30	400	aromatic compound catabolic process	7	BP
GO:0006200	1.57735e-05	3.54284	5.71943	18	176	ATP catabolic process	7	BP
GO:0009199	1.80252e-05	2.69486	11.1464	27	343	ribonucleoside triphosphate metabolic process	7	BP
GO:0003746	1.93148e-05	10.3514	0.877349	7	30	translation elongation factor activity	7	MF
GO:0009141	2.00057e-05	2.6773	11.2114	27	345	nucleoside triphosphate metabolic process	7	BP
GO:0046700	2.08414e-05	2.5266	13.1937	30	406	heterocycle catabolic process	7	BP
GO:0001522	2.12657e-05	13.9984	0.617439	6	19	pseudouridine synthesis	7	BP
GO:0044270	2.18464e-05	2.5196	13.2262	30	407	cellular nitrogen compound catabolic process	7	BP
GO:0043021	2.18662e-05	21.1289	0.380185	5	13	ribonucleoprotein binding	7	MF
GO:0004812	2.29165e-05	6.83858	1.57923	9	54	aminoacyl-tRNA ligase activity	7	MF
GO:0016875	2.29165e-05	6.83858	1.57923	9	54	ligase activity, forming carbon-oxygen bonds	7	MF
GO:0016876	2.29165e-05	6.83858	1.57923	9	54	ligase activity, forming aminoacyl-tRNA and related compounds	7	MF
GO:0009161	3.21749e-05	3.00708	7.76673	21	239	ribonucleoside monophosphate metabolic process	7	BP
GO:0000463	3.39898e-05	Inf	0.0974903	3	3	maturation of LSU-rRNA from tricistronic rRNA transcript (SSU-rRNA, 5.8S rRNA, LSU-rRNA)	7	BP
GO:0030687	4.26426e-05	Inf	0.10511	3	3	preribosome, large subunit precursor	7	CC
GO:0032502	4.30552e-05	1.89684	33.7642	57	1039	developmental process	7	BP
GO:0016570	5.63764e-05	3.85337	4.09459	14	126	histone modification	7	BP
GO:0032501	6.45079e-05	1.86481	34.2516	57	1054	multicellular organismal process	7	BP
GO:2000241	6.71092e-05	3.78492	4.15959	14	128	regulation of reproductive process	7	BP
GO:0048580	9.67822e-05	3.45421	4.84202	15	149	regulation of post-embryonic development	7	BP
GO:0006325	9.88337e-05	3.0333	6.56435	18	202	chromatin organization	7	BP
GO:0006418	0.000100799	6.4107	1.49485	8	46	tRNA aminoacylation for protein translation	7	BP
GO:0016569	0.000110703	3.59325	4.35457	14	134	covalent chromatin modification	7	BP
GO:0003006	0.000113186	2.18924	16.5734	33	510	developmental process involved in reproduction	7	BP
GO:0000470	0.000132677	90.2	0.129987	3	4	maturation of LSU-rRNA	7	BP
GO:0034654	0.000136154	1.79715	36.0064	58	1108	nucleobase-containing biosynthetic process	7	BP
GO:0043038	0.000160077	5.93964	1.59234	8	49	amino acid activation	7	BP
GO:0043039	0.000160077	5.93964	1.59234	8	49	tRNA aminoacylation	7	BP
GO:0046034	0.000162092	2.90428	6.82432	18	210	ATP metabolic process	7	BP
GO:0005732	0.000166127	83.3552	0.140147	3	4	small nucleolar ribonucleoprotein complex	7	CC
GO:0044262	0.000169621	1.77987	36.2989	58	1117	cellular carbohydrate metabolic process	7	BP
GO:0005759	0.000170154	5.91451	1.61169	8	46	mitochondrial matrix	7	CC
GO:0008536	0.000200611	19.2454	0.321695	4	11	Ran GTPase binding	7	MF
GO:0006397	0.000201984	4.10662	3.0222	11	93	mRNA processing	7	BP
GO:0048869	0.000239897	2.40116	10.9189	24	336	cellular developmental process	7	BP
GO:0008380	0.000247313	3.71634	3.60714	12	111	RNA splicing	7	BP
GO:0042991	0.000301109	17.2269	0.357465	4	11	transcription factor import into nucleus	7	BP
GO:0009791	0.000308714	2.03717	18.2307	34	561	post-embryonic development	7	BP
GO:0043933	0.000339286	2.09706	16.1184	31	496	macromolecular complex subunit organization	7	BP
GO:0044248	0.000356228	1.85459	26.0299	44	801	cellular catabolic process	7	BP
GO:0008757	0.000369742	5.13622	1.78394	8	61	S-adenosylmethionine-dependent methyltransferase activity	7	MF
GO:0017016	0.000414984	14.9653	0.380185	4	13	Ras GTPase binding	7	MF
GO:0031267	0.000414984	14.9653	0.380185	4	13	small GTPase binding	7	MF
GO:0006094	0.000415235	7.26949	1.0074	6	31	gluconeogenesis	7	BP
GO:0080008	0.000424412	7.29649	1.01607	6	29	CUL4 RING ubiquitin ligase complex	7	CC
GO:0000398	0.000486597	5.74215	1.42986	7	44	nuclear mRNA splicing, via spliceosome	7	BP
GO:0018130	0.00052169	1.66549	41.2384	62	1269	heterocycle biosynthetic process	7	BP
GO:0051276	0.000526389	2.53447	8.15669	19	251	chromosome organization	7	BP
GO:0042273	0.00063182	30.06	0.194981	3	6	ribosomal large subunit biogenesis	7	BP
GO:0000460	0.00063182	30.06	0.194981	3	6	maturation of 5.8S rRNA	7	BP
GO:0000466	0.00063182	30.06	0.194981	3	6	maturation of 5.8S rRNA from tricistronic rRNA transcript (SSU-rRNA, 5.8S rRNA, LSU-rRNA)	7	BP
GO:0000154	0.00063182	30.06	0.194981	3	6	rRNA modification	7	BP
GO:0031167	0.00063182	30.06	0.194981	3	6	rRNA methylation	7	BP
GO:0003924	0.000676802	4.14471	2.42733	9	83	GTPase activity	7	MF
GO:0004527	0.000742454	6.34582	1.11131	6	38	exonuclease activity	7	MF
GO:0016568	0.000791189	2.90428	5.26448	14	162	chromatin modification	7	BP
GO:0031369	0.000852111	Inf	0.0584899	2	2	translation initiation factor binding	7	MF
GO:0017151	0.000852111	Inf	0.0584899	2	2	DEAD/H-box RNA helicase binding	7	MF
GO:0051604	0.000927319	4.42083	2.0473	8	63	protein maturation	7	BP
GO:0044429	0.000971254	2.62406	6.62196	16	189	mitochondrial part	7	CC
GO:0019438	0.00105195	1.60649	43.2207	63	1330	aromatic compound biosynthetic process	7	BP
GO:0090151	0.00105267	Inf	0.0649936	2	2	establishment of protein localization in mitochondrial membrane	7	BP
GO:0034399	0.00122407	Inf	0.0700736	2	2	nuclear periphery	7	CC
GO:0072588	0.00122407	Inf	0.0700736	2	2	box H/ACA RNP complex	7	CC
GO:0005488	0.00123177	1.53109	169.796	193	5806	binding	7	MF
GO:0051020	0.00125946	10.3558	0.497164	4	17	GTPase binding	7	MF
GO:0072522	0.00131019	3.75231	2.66474	9	82	purine-containing compound biosynthetic process	7	BP
GO:0000375	0.00136096	4.71712	1.68983	7	52	RNA splicing, via transesterification reactions	7	BP
GO:0000377	0.00136096	4.71712	1.68983	7	52	RNA splicing, via transesterification reactions with bulged adenosine as nucleophile	7	BP
GO:0000166	0.00139126	1.51269	67.1172	89	2295	nucleotide binding	7	MF
GO:0031461	0.00166206	4.55716	1.75184	7	50	cullin-RING ubiquitin ligase complex	7	CC
GO:0000478	0.00168518	18.032	0.259974	3	8	endonucleolytic cleavage involved in rRNA processing	7	BP
GO:0019319	0.00169374	5.33987	1.29987	6	40	hexose biosynthetic process	7	BP
GO:0051082	0.0017355	4.47664	1.7547	7	60	unfolded protein binding	7	MF
GO:0009790	0.00176311	2.64911	5.71943	14	176	embryo development	7	BP
GO:0043412	0.00185201	1.5227	52.9373	73	1629	macromolecule modification	7	BP
GO:0022414	0.0019388	1.82578	19.4656	33	599	reproductive process	7	BP
GO:0034968	0.00203616	3.85601	2.30727	8	71	histone lysine methylation	7	BP
GO:0044271	0.00204871	1.54194	46.9903	66	1446	cellular nitrogen compound biosynthetic process	7	BP
GO:0005654	0.00211957	2.84271	4.58982	12	131	nucleoplasm	7	CC
GO:2000026	0.00241232	2.46045	6.56435	15	202	regulation of multicellular organismal development	7	BP
GO:0000003	0.00245063	1.7803	20.538	34	632	reproduction	7	BP
GO:0000469	0.00246723	15.025	0.292471	3	9	cleavage involved in rRNA processing	7	BP
GO:0048856	0.00248529	1.66109	28.6297	44	881	anatomical structure development	7	BP
GO:0008649	0.00250686	66.8889	0.0877349	2	3	rRNA methyltransferase activity	7	MF
GO:0051239	0.00253021	2.44709	6.59685	15	203	regulation of multicellular organismal process	7	BP
GO:0035639	0.0025738	1.52817	49.424	68	1690	purine ribonucleoside triphosphate binding	7	MF
GO:0016579	0.00297384	5.80472	1.0074	5	31	protein deubiquitination	7	BP
GO:0010387	0.00309003	59.9336	0.0974903	2	3	signalosome assembly	7	BP
GO:0008618	0.00309003	59.9336	0.0974903	2	3	7-methylguanosine metabolic process	7	BP
GO:0051246	0.00309311	2.47759	6.0769	14	187	regulation of protein metabolic process	7	BP
GO:0046686	0.00309311	2.47759	6.0769	14	187	response to cadmium ion	7	BP
GO:0044446	0.00315138	1.42696	71.7904	93	2049	intracellular organelle part	7	CC
GO:0002161	0.00342768	12.5798	0.321695	3	11	aminoacyl-tRNA editing activity	7	MF
GO:0022626	0.0034429	2.54583	5.50078	13	157	cytosolic ribosome	7	CC
GO:0044422	0.0034446	1.42144	72.0006	93	2055	organelle part	7	CC
GO:0048825	0.00350801	7.52926	0.649936	4	20	cotyledon development	7	BP
GO:0016779	0.00400016	2.9097	3.71411	10	127	nucleotidyltransferase activity	7	MF
GO:0003899	0.00417288	5.26768	1.08206	5	37	DNA-directed RNA polymerase activity	7	MF
GO:0071705	0.00458884	2.4514	5.68694	13	175	nitrogen compound transport	7	BP
GO:0010197	0.00461756	11.2662	0.357465	3	11	polar nucleus fusion	7	BP
GO:0009559	0.00461756	11.2662	0.357465	3	11	embryo sac central cell differentiation	7	BP
GO:0043141	0.00491692	33.4406	0.11698	2	4	ATP-dependent 5'-3' DNA helicase activity	7	MF
GO:0043139	0.00491692	33.4406	0.11698	2	4	5'-3' DNA helicase activity	7	MF
GO:0004832	0.00491692	33.4406	0.11698	2	4	valine-tRNA ligase activity	7	MF
GO:0010498	0.00534763	4.12167	1.62484	6	50	proteasomal protein catabolic process	7	BP
GO:0000049	0.00568941	10.0615	0.380185	3	13	tRNA binding	7	MF
GO:0044283	0.005814	1.4457	53.5222	71	1647	small molecule biosynthetic process	7	BP
GO:0006450	0.00601003	10.0133	0.389961	3	12	regulation of translational fidelity	7	BP
GO:0007006	0.00604737	29.9635	0.129987	2	4	mitochondrial membrane organization	7	BP
GO:0006438	0.00604737	29.9635	0.129987	2	4	valyl-tRNA aminoacylation	7	BP
GO:0008617	0.00604737	29.9635	0.129987	2	4	guanosine metabolic process	7	BP
GO:0032268	0.00665267	2.33394	5.94691	13	183	regulation of cellular protein metabolic process	7	BP
GO:0009908	0.00669118	2.12136	8.02671	16	247	flower development	7	BP
GO:0006164	0.00687185	3.41723	2.24228	7	69	purine nucleotide biosynthetic process	7	BP
GO:0009845	0.00687185	3.41723	2.24228	7	69	seed germination	7	BP
GO:0000178	0.00700774	27.6994	0.140147	2	4	exosome (RNase complex)	7	CC
GO:0090305	0.00719091	2.51746	4.67954	11	144	nucleic acid phosphodiester bond hydrolysis	7	BP
GO:0034062	0.00723518	4.55322	1.22829	5	42	RNA polymerase activity	7	MF
GO:0008276	0.00738393	5.84657	0.789614	4	27	protein methyltransferase activity	7	MF
GO:0022621	0.00745279	1.95833	10.3015	19	317	shoot system development	7	BP
GO:0048367	0.00745279	1.95833	10.3015	19	317	shoot development	7	BP
GO:0004523	0.00803704	22.2912	0.146225	2	5	ribonuclease H activity	7	MF
GO:0004532	0.00803704	22.2912	0.146225	2	5	exoribonuclease activity	7	MF
GO:0016423	0.00803704	22.2912	0.146225	2	5	tRNA (guanine) methyltransferase activity	7	MF
GO:0008409	0.00803704	22.2912	0.146225	2	5	5'-3' exonuclease activity	7	MF
GO:0016896	0.00803704	22.2912	0.146225	2	5	exoribonuclease activity, producing 5'-phosphomonoesters	7	MF
GO:0019843	0.00881116	4.31872	1.28678	5	44	rRNA binding	7	MF
GO:0019915	0.00928995	5.47218	0.844916	4	26	lipid storage	7	BP
GO:0050826	0.00928995	5.47218	0.844916	4	26	response to freezing	7	BP
GO:0090351	0.00930106	3.20869	2.37227	7	73	seedling development	7	BP
GO:0005975	0.00954467	1.45014	43.0257	58	1324	carbohydrate metabolic process	7	BP
GO:0008170	0.00954763	5.37761	0.848104	4	29	N-methyltransferase activity	7	MF
GO:0034969	0.00986316	19.9734	0.162484	2	5	histone arginine methylation	7	BP
GO:0009062	3.36262e-05	7.45154	1.26823	8	55	fatty acid catabolic process	8	BP
GO:0006635	5.00047e-05	8.4817	0.991527	7	43	fatty acid beta-oxidation	8	BP
GO:0019395	6.77189e-05	8.03353	1.03764	7	45	fatty acid oxidation	8	BP
GO:0016042	6.89405e-05	5.11798	2.21364	10	96	lipid catabolic process	8	BP
GO:0072329	7.22319e-05	6.60359	1.40659	8	61	monocarboxylic acid catabolic process	8	BP
GO:0034440	9.02545e-05	7.63017	1.08376	7	47	lipid oxidation	8	BP
GO:0044242	0.00014211	5.92811	1.54494	8	67	cellular lipid catabolic process	8	BP
GO:0003995	0.000409936	31.808	0.16346	3	7	acyl-CoA dehydrogenase activity	8	MF
GO:0003997	0.000542756	Inf	0.046703	2	2	acyl-CoA oxidase activity	8	MF
GO:0009744	0.00143824	5.41926	1.24517	6	54	response to sucrose stimulus	8	BP
GO:0006212	0.00156368	85.5211	0.0691763	2	3	uracil catabolic process	8	BP
GO:0006208	0.00156368	85.5211	0.0691763	2	3	pyrimidine base catabolic process	8	BP
GO:0018106	0.00156368	85.5211	0.0691763	2	3	peptidyl-histidine phosphorylation	8	BP
GO:0046113	0.00156368	85.5211	0.0691763	2	3	nucleobase catabolic process	8	BP
GO:0034285	0.00158384	5.30808	1.26823	6	55	response to disaccharide stimulus	8	BP
GO:0010033	0.00255746	1.9198	15.2418	27	661	response to organic substance	8	BP
GO:0030258	0.00257701	4.10895	1.86776	7	81	lipid modification	8	BP
GO:0016558	0.00275896	7.83025	0.599528	4	26	protein import into peroxisome matrix	8	BP
GO:0043617	0.00307982	42.7559	0.0922351	2	4	cellular response to sucrose starvation	8	BP
GO:0019860	0.00307982	42.7559	0.0922351	2	4	uracil metabolic process	8	BP
GO:0047334	0.00315695	42.2163	0.093406	2	4	diphosphate-fructose-6-phosphate 1-phosphotransferase activity	8	MF
GO:0046395	0.00324389	3.21833	3.0207	9	131	carboxylic acid catabolic process	8	BP
GO:0016054	0.00324389	3.21833	3.0207	9	131	organic acid catabolic process	8	BP
GO:0009725	0.00342638	2.12728	9.59245	19	416	response to hormone stimulus	8	BP
GO:0006625	0.00364511	7.17615	0.645646	4	28	protein targeting to peroxisome	8	BP
GO:0072662	0.00364511	7.17615	0.645646	4	28	protein localization to peroxisome	8	BP
GO:0072663	0.00364511	7.17615	0.645646	4	28	establishment of protein localization to peroxisome	8	BP
GO:0043574	0.00415307	6.88834	0.668704	4	29	peroxisomal transport	8	BP
GO:0044030	0.00505513	28.5008	0.115294	2	5	regulation of DNA methylation	8	BP
GO:0072529	0.00505513	28.5008	0.115294	2	5	pyrimidine-containing compound catabolic process	8	BP
GO:0032578	0.00521507	28.0298	0.117135	2	5	aleurone grain membrane	8	CC
GO:0003677	0.00600541	1.67271	22.721	35	973	DNA binding	8	MF
GO:0009719	0.0067018	1.98564	10.215	19	443	response to endogenous stimulus	8	BP
GO:0018202	0.00746784	21.3732	0.138353	2	6	peptidyl-histidine modification	8	BP
GO:0033095	0.00770217	21.0201	0.140562	2	6	aleurone grain	8	CC
GO:0007031	0.00908687	5.37737	0.830116	4	36	peroxisome organization	8	BP
GO:0009408	2.4193e-19	12.6774	3.15744	28	115	response to heat	9	BP
GO:0006457	1.05461e-15	8.64581	4.25568	28	155	protein folding	9	BP
GO:0009266	2.26708e-10	4.42196	8.37409	31	305	response to temperature stimulus	9	BP
GO:0009644	3.80336e-10	10.3896	1.89447	15	69	response to high light intensity	9	BP
GO:0042542	2.49867e-08	7.26761	2.52595	15	92	response to hydrogen peroxide	9	BP
GO:0043565	3.84267e-08	4.40765	6.10008	23	223	sequence-specific DNA binding	9	MF
GO:0000302	4.746e-08	5.90113	3.432	17	125	response to reactive oxygen species	9	BP
GO:0009642	6.01377e-08	6.73774	2.69069	15	98	response to light intensity	9	BP
GO:0003700	1.33351e-07	3.50738	9.2185	28	337	sequence-specific DNA binding transcription factor activity	9	MF
GO:0001071	1.41908e-07	3.49565	9.24586	28	338	nucleic acid binding transcription factor activity	9	MF
GO:0009628	9.87528e-07	2.34947	24.1338	49	879	response to abiotic stimulus	9	BP
GO:0010035	2.98732e-06	2.945	10.7353	28	391	response to inorganic substance	9	BP
GO:0006979	1.60914e-05	3.27104	6.83655	20	249	response to oxidative stress	9	BP
GO:0003677	6.56966e-05	1.99478	26.616	47	973	DNA binding	9	MF
GO:0051082	0.000209259	5.62056	1.64128	8	60	unfolded protein binding	9	MF
GO:0051252	0.000240021	1.94681	23.3376	41	850	regulation of RNA metabolic process	9	BP
GO:0031323	0.000254034	1.82089	31.3273	51	1141	regulation of cellular metabolic process	9	BP
GO:0019222	0.00025966	1.7759	35.4457	56	1291	regulation of metabolic process	9	BP
GO:0080090	0.00026211	1.82781	30.5586	50	1113	regulation of primary metabolic process	9	BP
GO:0050794	0.000283305	1.68879	46.538	69	1695	regulation of cellular process	9	BP
GO:0060590	0.000380455	35.9835	0.164128	3	6	ATPase regulator activity	9	MF
GO:0019219	0.000388338	1.86897	25.4517	43	927	regulation of nucleobase-containing compound metabolic process	9	BP
GO:0051171	0.000509902	1.84123	25.7812	43	939	regulation of nitrogen compound metabolic process	9	BP
GO:0042026	0.000659715	26.8696	0.192192	3	7	protein refolding	9	BP
GO:0006355	0.000719534	1.85744	23.0356	39	839	regulation of transcription, DNA-dependent	9	BP
GO:0045471	0.000750969	Inf	0.0549121	2	2	response to ethanol	9	BP
GO:0050789	0.000878072	1.58428	53.6765	75	1955	regulation of biological process	9	BP
GO:0016161	0.00102271	21.5852	0.218837	3	8	beta-amylase activity	9	MF
GO:0046688	0.00103417	21.4933	0.219648	3	8	response to copper ion	9	BP
GO:2000112	0.00109782	1.78558	25.1497	41	916	regulation of cellular macromolecule biosynthetic process	9	BP
GO:0010556	0.00112133	1.78333	25.1772	41	917	regulation of macromolecule biosynthetic process	9	BP
GO:0010468	0.00113652	1.74883	27.6208	44	1006	regulation of gene expression	9	BP
GO:0009889	0.00121036	1.76376	26.0832	42	950	regulation of biosynthetic process	9	BP
GO:0060255	0.00144399	1.69709	30.4213	47	1108	regulation of macromolecule metabolic process	9	BP
GO:0065007	0.00156154	1.5348	57.438	78	2092	biological regulation	9	BP
GO:0006950	0.0017924	1.59259	41.7881	60	1522	response to stress	9	BP
GO:0031326	0.00202741	1.72007	25.9734	41	946	regulation of cellular biosynthetic process	9	BP
GO:0016160	0.0021042	15.4145	0.273546	3	10	amylase activity	9	MF
GO:0001671	0.00219549	71.6885	0.0820638	2	3	ATPase activator activity	9	MF
GO:2000896	0.00221198	71.3937	0.0823681	2	3	amylopectin metabolic process	9	BP
GO:0032781	0.00221198	71.3937	0.0823681	2	3	positive regulation of ATPase activity	9	BP
GO:0005634	0.00303783	1.56741	39.2245	56	1461	nucleus	9	CC
GO:0003676	0.00379496	1.51818	46.749	64	1709	nucleic acid binding	9	MF
GO:0010021	0.00434379	35.6929	0.109824	2	4	amylopectin biosynthetic process	9	BP
GO:0043462	0.00434379	35.6929	0.109824	2	4	regulation of ATPase activity	9	BP
GO:0043484	0.00434379	35.6929	0.109824	2	4	regulation of RNA splicing	9	BP
GO:0006351	0.00518114	1.63715	25.6988	39	936	transcription, DNA-dependent	9	BP
GO:0043170	0.00566277	1.38985	111.609	132	4065	macromolecule metabolic process	9	BP
GO:0032774	0.00586516	1.62308	25.891	39	943	RNA biosynthetic process	9	BP
GO:0051087	0.00588613	9.80471	0.382965	3	14	chaperone binding	9	MF
GO:0000976	0.00721068	8.98663	0.410319	3	15	transcription regulatory region sequence-specific DNA binding	9	MF
GO:0044260	0.00880537	1.36454	101.066	120	3681	cellular macromolecule metabolic process	9	BP
GO:0004674	6.69246e-07	2.66329	16.9565	39	663	protein serine/threonine kinase activity	10	MF
GO:0004672	1.05885e-06	2.49306	20.0256	43	783	protein kinase activity	10	MF
GO:0031410	3.63827e-06	1.96948	45.0649	74	1819	cytoplasmic vesicle	10	CC
GO:0016023	3.63827e-06	1.96948	45.0649	74	1819	cytoplasmic membrane-bounded vesicle	10	CC
GO:0006468	3.81266e-06	2.32961	21.7072	44	854	protein phosphorylation	10	BP
GO:0031982	3.87298e-06	1.96533	45.1392	74	1822	vesicle	10	CC
GO:0031988	3.87298e-06	1.96533	45.1392	74	1822	membrane-bounded vesicle	10	CC
GO:0016301	5.81139e-06	2.20043	25.8056	49	1009	kinase activity	10	MF
GO:0043531	6.59201e-06	3.50205	6.44501	20	252	ADP binding	10	MF
GO:0032559	9.51474e-06	1.92692	44.7059	72	1748	adenyl ribonucleotide binding	10	MF
GO:0016772	1.1581e-05	2.08164	29.5396	53	1155	transferase activity, transferring phosphorus-containing groups	10	MF
GO:0016773	1.39068e-05	2.20223	22.8645	44	894	phosphotransferase activity, alcohol group as acceptor	10	MF
GO:0016310	1.40949e-05	2.08527	28.138	51	1107	phosphorylation	10	BP
GO:0032553	1.4271e-05	1.8716	49.4629	77	1934	ribonucleotide binding	10	MF
GO:0001883	1.44968e-05	1.88097	47.7749	75	1868	purine nucleoside binding	10	MF
GO:0032550	1.44968e-05	1.88097	47.7749	75	1868	purine ribonucleoside binding	10	MF
GO:0032549	1.53772e-05	1.87702	47.8517	75	1871	ribonucleoside binding	10	MF
GO:0001882	1.56816e-05	1.87571	47.8772	75	1872	nucleoside binding	10	MF
GO:0030554	1.68188e-05	1.88777	45.422	72	1776	adenyl nucleotide binding	10	MF
GO:0032555	1.71499e-05	1.86451	48.8491	76	1910	purine ribonucleotide binding	10	MF
GO:0017076	2.91885e-05	1.82905	49.5652	76	1938	purine nucleotide binding	10	MF
GO:0016740	3.37962e-05	1.78612	56.7519	84	2219	transferase activity	10	MF
GO:0043168	3.83734e-05	1.78927	54.2967	81	2123	anion binding	10	MF
GO:0030246	0.000134601	3.71687	3.88747	13	152	carbohydrate binding	10	MF
GO:0006464	0.000355747	1.74367	37.6699	58	1482	protein modification process	10	BP
GO:0043167	0.000368387	1.58477	99.335	125	3884	ion binding	10	MF
GO:0003852	0.000651332	Inf	0.0511509	2	2	2-isopropylmalate synthase activity	10	MF
GO:0000166	0.000977577	1.57664	58.6957	80	2295	nucleotide binding	10	MF
GO:0006952	0.00163078	1.98414	14.7426	27	580	defense response	10	BP
GO:0043412	0.00221136	1.587	41.4064	59	1629	macromolecule modification	10	BP
GO:0046777	0.00284104	4.69455	1.42342	6	56	protein autophosphorylation	10	BP
GO:0001871	0.00292539	4.66768	1.43223	6	56	pattern binding	10	MF
GO:0030247	0.00292539	4.66768	1.43223	6	56	polysaccharide binding	10	MF
GO:0005488	0.00344864	1.50191	148.491	168	5806	binding	10	MF
GO:0000793	0.00357298	11.9466	0.322069	3	13	condensed chromosome	10	CC
GO:0005667	0.00357599	7.2619	0.644138	4	26	transcription factor complex	10	CC
GO:0010364	0.00373205	38.6596	0.101673	2	4	regulation of ethylene biosynthetic process	10	BP
GO:0009098	0.00373205	38.6596	0.101673	2	4	leucine biosynthetic process	10	BP
GO:0031335	0.00373205	38.6596	0.101673	2	4	regulation of sulfur amino acid metabolic process	10	BP
GO:0005524	0.00413232	1.55543	39.0793	55	1528	ATP binding	10	MF
GO:0035639	0.00572335	1.50874	43.2225	59	1690	purine ribonucleoside triphosphate binding	10	MF
GO:0006890	0.00611598	25.7702	0.127091	2	5	retrograde vesicle-mediated transport, Golgi to ER	10	BP
GO:0006521	0.00902074	19.3255	0.15251	2	6	regulation of cellular amino acid metabolic process	10	BP
GO:0033238	0.00902074	19.3255	0.15251	2	6	regulation of cellular amine metabolic process	10	BP
GO:0009536	2.25585e-06	1.85432	70.1015	104	2673	plastid	11	CC
GO:0009507	3.37213e-05	1.93388	33.7001	57	1285	chloroplast	11	CC
GO:0030955	5.42902e-05	29.9145	0.238185	4	9	potassium ion binding	11	MF
GO:0031420	5.42902e-05	29.9145	0.238185	4	9	alkali metal ion binding	11	MF
GO:0004743	5.42902e-05	29.9145	0.238185	4	9	pyruvate kinase activity	11	MF
GO:0009624	0.000247916	7.93659	0.908408	6	35	response to nematode	11	BP
GO:0015291	0.000259667	3.95391	3.09641	11	117	secondary active transmembrane transporter activity	11	MF
GO:0009607	0.00076364	2.33595	9.7589	21	376	response to biotic stimulus	11	BP
GO:0022804	0.00104942	2.69753	6.03403	15	228	active transmembrane transporter activity	11	MF
GO:0051707	0.00120228	2.29533	9.42149	20	363	response to other organism	11	BP
GO:0044434	0.00166036	1.85156	19.3284	33	737	chloroplast part	11	CC
GO:0044435	0.00206799	1.82353	19.5906	33	747	plastid part	11	CC
GO:0005315	0.00258028	13.958	0.291115	3	11	inorganic phosphate transmembrane transporter activity	11	MF
GO:0008509	0.00274527	3.63415	2.40832	8	91	anion transmembrane transporter activity	11	MF
GO:0009812	0.00281772	5.78507	0.986272	5	38	flavonoid metabolic process	11	BP
GO:0016702	0.00284971	7.85965	0.608696	4	23	oxidoreductase activity, acting on single donors with incorporation of molecular oxygen, incorporation of two atoms of oxygen	11	MF
GO:0016778	0.00337361	12.4057	0.31758	3	12	diphosphotransferase activity	11	MF
GO:0015114	0.00337361	12.4057	0.31758	3	12	phosphate transmembrane transporter activity	11	MF
GO:0031406	0.00346502	4.50259	1.48204	6	56	carboxylic acid binding	11	MF
GO:0009611	0.00373416	3.83489	1.9985	7	77	response to wounding	11	BP
GO:0009642	0.0038688	3.41576	2.54354	8	98	response to light intensity	11	BP
GO:0010205	0.0038887	37.8333	0.103818	2	4	photoinhibition	11	BP
GO:0043155	0.0038887	37.8333	0.103818	2	4	negative regulation of photosynthesis, light reaction	11	BP
GO:0016725	0.00404016	37.089	0.10586	2	4	oxidoreductase activity, acting on CH or CH2 groups	11	MF
GO:0009941	0.00476768	2.09724	9.15279	18	349	chloroplast envelope	11	CC
GO:0015297	0.00489527	4.16715	1.5879	6	60	antiporter activity	11	MF
GO:0009526	0.00584124	2.05222	9.33637	18	356	plastid envelope	11	CC
GO:0009647	0.00637039	25.2194	0.129773	2	5	skotomorphogenesis	11	BP
GO:0008728	0.00661627	24.7232	0.132325	2	5	GTP diphosphokinase activity	11	MF
GO:0016701	0.00763239	5.73899	0.793951	4	30	oxidoreductase activity, acting on single donors with incorporation of molecular oxygen	11	MF
GO:0004872	0.00772149	4.45177	1.24386	5	47	receptor activity	11	MF
GO:0019201	0.00794198	8.58462	0.42344	3	16	nucleotide kinase activity	11	MF
GO:0042802	0.00858108	3.24504	2.32892	7	88	identical protein binding	11	MF
GO:0016597	0.00858465	5.5258	0.820416	4	31	amino acid binding	11	MF
GO:0004222	0.00858465	5.5258	0.820416	4	31	metalloendopeptidase activity	11	MF
GO:0009644	0.00880792	3.63963	1.79086	6	69	response to high light intensity	11	BP
GO:0009813	0.0089936	5.43457	0.830545	4	32	flavonoid biosynthetic process	11	BP
GO:0009617	0.00913086	2.54938	4.17868	10	161	response to bacterium	11	BP
GO:0006820	0.00913086	2.54938	4.17868	10	161	anion transport	11	BP
GO:0031408	0.00925194	4.23676	1.29773	5	50	oxylipin biosynthetic process	11	BP
GO:0015969	0.00939261	18.9125	0.155727	2	6	guanosine tetraphosphate metabolic process	11	BP
GO:0034035	0.00939261	18.9125	0.155727	2	6	purine ribonucleoside bisphosphate metabolic process	11	BP
GO:0006457	6.3189e-06	4.74325	3.358	14	155	protein folding	12	BP
GO:2001057	1.39846e-05	46.0505	0.173316	4	8	reactive nitrogen species metabolic process	12	BP
GO:0042126	2.47455e-05	36.8364	0.194981	4	9	nitrate metabolic process	12	BP
GO:0042128	2.47455e-05	36.8364	0.194981	4	9	nitrate assimilation	12	BP
GO:0010035	3.72494e-05	2.89922	8.47083	22	391	response to inorganic substance	12	BP
GO:0000302	8.06737e-05	4.55075	2.70807	11	125	response to reactive oxygen species	12	BP
GO:0016661	9.28371e-05	69.8333	0.10675	3	5	oxidoreductase activity, acting on other nitrogenous compounds as donors	12	MF
GO:0071941	0.000241996	16.7328	0.324968	4	15	nitrogen cycle metabolic process	12	BP
GO:0006801	0.000317216	15.3367	0.346632	4	16	superoxide metabolic process	12	BP
GO:0042026	0.000328836	34.3643	0.151652	3	7	protein refolding	12	BP
GO:0008940	0.000453496	Inf	0.0426999	2	2	nitrate reductase activity	12	MF
GO:0016721	0.00073196	23.2672	0.192149	3	9	oxidoreductase activity, acting on superoxide radicals as acceptor	12	MF
GO:0004784	0.00073196	23.2672	0.192149	3	9	superoxide dismutase activity	12	MF
GO:0004722	0.000872916	6.00824	1.13155	6	53	protein serine/threonine phosphatase activity	12	MF
GO:0002238	0.00107441	19.6303	0.216645	3	10	response to molecule of fungal origin	12	BP
GO:0046857	0.00134132	92.6316	0.0640498	2	3	oxidoreductase activity, acting on other nitrogenous compounds as donors, with NAD or NADP as acceptor	12	MF
GO:0071396	0.00138875	5.44478	1.23488	6	57	cellular response to lipid	12	BP
GO:0042221	0.0022888	1.74489	24.6759	39	1139	response to chemical stimulus	12	BP
GO:0019430	0.00244059	13.7367	0.281639	3	13	removal of superoxide radicals	12	BP
GO:0071450	0.00244059	13.7367	0.281639	3	13	cellular response to oxygen radical	12	BP
GO:0071451	0.00244059	13.7367	0.281639	3	13	cellular response to superoxide	12	BP
GO:0009266	0.00256947	2.44293	6.60768	15	305	response to temperature stimulus	12	BP
GO:0043546	0.00264491	46.3105	0.0853998	2	4	molybdopterin cofactor binding	12	MF
GO:0010038	0.00356895	2.64166	4.87452	12	225	response to metal ion	12	BP
GO:0003951	0.00360711	11.6257	0.320249	3	15	NAD+ kinase activity	12	MF
GO:0009644	0.00370317	4.40185	1.49485	6	69	response to high light intensity	12	BP
GO:0010286	0.00455538	10.5632	0.346632	3	16	heat acclimation	12	BP
GO:0034614	0.00475357	5.00772	1.10489	5	51	cellular response to reactive oxygen species	12	BP
GO:0009642	0.00529539	3.56252	2.12312	7	98	response to light intensity	12	BP
GO:0033993	0.00590999	3.48514	2.16645	7	100	response to lipid	12	BP
GO:0000303	0.00642986	9.15276	0.389961	3	18	response to superoxide	12	BP
GO:0000305	0.00642986	9.15276	0.389961	3	18	response to oxygen radical	12	BP
GO:0006979	0.00790647	2.36775	5.39447	12	249	response to oxidative stress	12	BP
GO:0009628	0.00802856	1.69961	19.0431	30	879	response to abiotic stimulus	12	BP
GO:0034599	0.0082115	4.34297	1.25654	5	58	cellular response to oxidative stress	12	BP
GO:0005247	0.00887339	18.5179	0.14945	2	7	voltage-gated chloride channel activity	12	MF
GO:0009507	1.07929e-25	4.17623	37.9626	107	1285	chloroplast	13	CC
GO:0031976	6.65385e-22	7.61417	7.97657	45	270	plastid thylakoid	13	CC
GO:0009534	6.65385e-22	7.61417	7.97657	45	270	chloroplast thylakoid	13	CC
GO:0044436	2.30703e-21	7.78162	7.4448	43	252	thylakoid part	13	CC
GO:0031984	2.64737e-21	7.3141	8.24246	45	279	organelle subcompartment	13	CC
GO:0042651	6.92408e-21	8.28143	6.52897	40	221	thylakoid membrane	13	CC
GO:0009579	1.15383e-20	6.49747	9.77869	48	331	thylakoid	13	CC
GO:0034357	1.48416e-20	7.81736	7.0312	41	238	photosynthetic membrane	13	CC
GO:0044434	1.60319e-20	4.4208	21.7731	72	737	chloroplast part	13	CC
GO:0015979	2.41046e-20	7.97121	6.7589	40	230	photosynthesis	13	BP
GO:0044435	3.50616e-20	4.3503	22.0685	72	747	plastid part	13	CC
GO:0009536	5.95744e-20	3.05621	78.9681	151	2673	plastid	13	CC
GO:0055035	1.72239e-18	7.91222	6.02674	36	204	plastid thylakoid membrane	13	CC
GO:0009535	1.15329e-17	7.66167	5.9972	35	203	chloroplast thylakoid membrane	13	CC
GO:0046148	1.00496e-14	8.68026	3.93779	26	134	pigment biosynthetic process	13	BP
GO:0042440	2.7642e-13	7.00775	4.87816	27	166	pigment metabolic process	13	BP
GO:0051186	4.5898e-12	4.17459	11.6371	40	396	cofactor metabolic process	13	BP
GO:0044272	9.77385e-12	5.88627	5.64221	27	192	sulfur compound biosynthetic process	13	BP
GO:0006534	1.38083e-11	11.0197	2.08644	17	71	cysteine metabolic process	13	BP
GO:0006790	1.39565e-11	5.17564	7.05277	30	240	sulfur compound metabolic process	13	BP
GO:0031975	7.28455e-11	3.46193	15.5395	45	526	envelope	13	CC
GO:0015995	1.19278e-10	10.3313	2.05706	16	70	chlorophyll biosynthetic process	13	BP
GO:0009069	1.59773e-10	7.76635	3.08559	19	105	serine family amino acid metabolic process	13	BP
GO:0006779	1.97795e-10	9.00413	2.43908	17	83	porphyrin biosynthetic process	13	BP
GO:0031967	2.38284e-10	3.37095	15.51	44	525	organelle envelope	13	CC
GO:0051188	2.67255e-10	4.8148	6.96461	28	237	cofactor biosynthetic process	13	BP
GO:0019684	3.40834e-10	6.1338	4.37859	22	149	photosynthesis, light reaction	13	BP
GO:0033014	3.56882e-10	8.60977	2.52724	17	86	tetrapyrrole biosynthetic process	13	BP
GO:0019344	9.80627e-10	9.64822	2.02767	15	69	cysteine biosynthetic process	13	BP
GO:0006082	1.90856e-09	2.63888	27.829	61	947	organic acid metabolic process	13	BP
GO:0044106	2.14461e-09	3.36796	13.6353	39	464	cellular amine metabolic process	13	BP
GO:0006091	2.81101e-09	3.74775	10.3441	33	352	generation of precursor metabolites and energy	13	BP
GO:0009521	2.86043e-09	9.81866	1.8612	14	63	photosystem	13	CC
GO:0042180	3.38778e-09	2.59338	28.2405	61	961	cellular ketone metabolic process	13	BP
GO:0009309	3.98951e-09	4.08251	8.34577	29	284	amine biosynthetic process	13	BP
GO:0043436	4.6787e-09	2.58673	27.7703	60	945	oxoacid metabolic process	13	BP
GO:0009070	4.94065e-09	8.39582	2.26276	15	77	serine family amino acid biosynthetic process	13	BP
GO:0000096	5.94296e-09	6.05561	3.79086	19	129	sulfur amino acid metabolic process	13	BP
GO:0015994	6.57293e-09	6.89476	3.02681	17	103	chlorophyll metabolic process	13	BP
GO:0006520	6.91235e-09	3.32386	13.0182	37	443	cellular amino acid metabolic process	13	BP
GO:0009308	7.67743e-09	3.14882	14.8696	40	506	amine metabolic process	13	BP
GO:0006778	8.55604e-09	6.29297	3.46761	18	118	porphyrin metabolic process	13	BP
GO:0033013	9.81773e-09	6.22997	3.497	18	119	tetrapyrrole metabolic process	13	BP
GO:0019752	1.27321e-08	2.54409	27.0944	58	922	carboxylic acid metabolic process	13	BP
GO:0008652	2.80755e-08	3.91212	8.02252	27	273	cellular amino acid biosynthetic process	13	BP
GO:0044446	3.18088e-08	2.05594	60.5333	100	2049	intracellular organelle part	13	CC
GO:0044422	3.71485e-08	2.04797	60.7106	100	2055	organelle part	13	CC
GO:0031978	4.43976e-08	16.9275	0.797657	9	27	plastid thylakoid lumen	13	CC
GO:0009543	4.43976e-08	16.9275	0.797657	9	27	chloroplast thylakoid lumen	13	CC
GO:0046394	4.92515e-08	3.05495	14.0174	37	477	carboxylic acid biosynthetic process	13	BP
GO:0016053	4.92515e-08	3.05495	14.0174	37	477	organic acid biosynthetic process	13	BP
GO:0031977	6.5616e-08	10.6983	1.35897	11	46	thylakoid lumen	13	CC
GO:0009523	8.34407e-08	10.4	1.38851	11	47	photosystem II	13	CC
GO:0000097	8.96726e-08	6.03842	3.17375	16	108	sulfur amino acid biosynthetic process	13	BP
GO:0009570	1.10519e-07	3.21851	11.4035	32	386	chloroplast stroma	13	CC
GO:0005737	1.239e-07	2.4173	217.524	252	7363	cytoplasm	13	CC
GO:0009532	1.98953e-07	3.12661	11.699	32	396	plastid stroma	13	CC
GO:0010287	2.33297e-07	13.2405	0.945372	9	32	plastoglobule	13	CC
GO:0009941	4.32889e-07	3.2009	10.3105	29	349	chloroplast envelope	13	CC
GO:0046933	6.48514e-07	30.5598	0.362838	6	13	hydrogen ion transporting ATP synthase activity, rotational mechanism	13	MF
GO:0009526	6.54916e-07	3.12996	10.5173	29	356	plastid envelope	13	CC
GO:0006732	7.13051e-07	3.55442	7.69927	24	262	coenzyme metabolic process	13	BP
GO:0009058	1.00374e-06	1.83648	81.9003	119	2787	biosynthetic process	13	BP
GO:0008299	1.28748e-06	3.78909	6.3181	21	215	isoprenoid biosynthetic process	13	BP
GO:0016117	1.30928e-06	7.52852	1.79258	11	61	carotenoid biosynthetic process	13	BP
GO:0016109	1.30928e-06	7.52852	1.79258	11	61	tetraterpenoid biosynthetic process	13	BP
GO:0006720	1.36467e-06	3.63949	6.87645	22	234	isoprenoid metabolic process	13	BP
GO:0015985	1.43183e-06	16.9213	0.617117	7	21	energy coupled proton transport, down electrochemical gradient	13	BP
GO:0015986	1.43183e-06	16.9213	0.617117	7	21	ATP synthesis coupled proton transport	13	BP
GO:0016114	1.50625e-06	5.48374	2.99743	14	102	terpenoid biosynthetic process	13	BP
GO:0016116	2.15333e-06	7.10001	1.88074	11	64	carotenoid metabolic process	13	BP
GO:0016108	2.15333e-06	7.10001	1.88074	11	64	tetraterpenoid metabolic process	13	BP
GO:0009145	2.2009e-06	11.8039	0.910982	8	31	purine nucleoside triphosphate biosynthetic process	13	BP
GO:0009206	2.2009e-06	11.8039	0.910982	8	31	purine ribonucleoside triphosphate biosynthetic process	13	BP
GO:0006733	2.67107e-06	4.53831	4.05534	16	138	oxidoreduction coenzyme metabolic process	13	BP
GO:0006721	3.23272e-06	4.75063	3.64393	15	124	terpenoid metabolic process	13	BP
GO:0044444	4.31544e-06	2.00969	209.459	241	7090	cytoplasmic part	13	CC
GO:0046496	5.77557e-06	4.81923	3.35006	14	114	nicotinamide nucleotide metabolic process	13	BP
GO:0055114	6.27282e-06	2.02634	34.0884	60	1160	oxidation-reduction process	13	BP
GO:0019362	6.40545e-06	4.77098	3.37945	14	115	pyridine nucleotide metabolic process	13	BP
GO:0031969	7.06901e-06	5.09529	2.95429	13	100	chloroplast membrane	13	CC
[truncated: 2,491 more rows]

## Sheet: F
Supplementary file 1F: expression mean, variance and cluster for the 17931 genes in the two-season analysis of our data. Names and category of characterized environmental response genes/homologs of characterized environmental response genes as reported in figure 6 are indicated. RAP gene names and symbol provided by Hiroaki Sakai.
gene	MSU annotation	gene name (RAP)	gene symbol (RAP)	other gene names (RAP)	other gene symbols (RAP)	mean expression irrigated field dry season	mean expression rainfed field dry season	mean expression irrigated field wet season	mean expression rainfed field wet season	variance irrigated field dry season	variance rainfed field dry season	variance irrigated field wet season	variance rainfed wet season	genotype correlation	cluster	correlation cluster mean	name (fig. 6)	category (fig. 6)
11562.t00001	photosystem II protein D1					2.48888	2.34254	2.1086	2.06001	0.0154186	0.0237942	0.0215353	0.0203576	0.509139	1	0.690837
11562.t00003	ribosomal protein S16					2.46986	2.3044	2.34719	2.28647	0.00351711	0.0143134	0.00432539	0.00614084	0.27136	49	0.75784
11562.t00006	ORF100					2.12651	2.00019	1.79507	1.80974	0.013876	0.0193241	0.0182144	0.0141884	0.474635	18	0.739856
11562.t00010	ORF91					2.48793	1.9596	2.26578	1.9621	0.00567729	0.0360264	0.0163664	0.0502263	0.637406	14	0.869975
11562.t00014	RNA polymerase beta chain					1.22676	1.22985	1.17985	1.22737	0.0498322	0.0288641	0.043593	0.0276174	0.321206	40	0.254187
11562.t00016	RNA polymerase beta'' chain					1.37195	1.28481	1.40343	1.29441	0.0341952	0.0203351	0.0195619	0.0368247	0.16358	50	0.552787
11562.t00024	photosystem I P700 apoprotein A1					1.82392	1.65589	1.42713	1.42861	0.0200172	0.018525	0.0320714	0.0372789	0.353142	1	0.654478
11562.t00028	NADH dehydrogenase subunit K					1.84281	1.74072	1.54919	1.47912	0.00644317	0.00947499	0.0378122	0.033909	0.113417	13	0.444703
11562.t00032	ribulose 1,5-bisphosphate carboxylase/oxygenase large chain					3.30633	3.1307	2.86826	2.75551	0.000682348	0.00769361	0.00775559	0.0138586	0.495373	13	0.856402
11562.t00081	NADH dehydrogenase subunit 5					2.36142	2.07008	2.20857	2.0418	0.00634672	0.0264459	0.0103981	0.0257741	0.514877	14	0.728552
11562.t00083	cytochrome c biogenesis protein					2.70213	2.42287	2.63476	2.49968	0.00284811	0.0150177	0.00855105	0.0127965	0.478108	14	0.821436
11562.t00090	NADH dehydrogenase subunit 7					2.27255	2.17931	1.9335	1.94453	0.00523263	0.0303301	0.0136459	0.0225994	-0.00256913	49	0.458835
11706.t00001	Pseudo ribosomal protein S11~Ribosomal proteins, pseudogene					2.82857	2.94289	2.85561	2.94793	0.00237594	0.00972363	0.00261283	0.00684961	0.825119	2	0.875075
11706.t00011	ORFB protein					1.38424	1.43139	1.476	1.5382	0.011319	0.0150802	0.0185662	0.0069048	-0.0428226	38	0.365733
11706.t00013	NADH dehydrogenase subunit 6					2.03541	2.17724	1.70727	1.79046	0.00436773	0.0108296	0.0145809	0.0111403	0.249889	26	0.586473
11706.t00014	Cytochrome c biogenesis C					2.49109	2.47963	2.34439	2.30621	0.00225397	0.00500222	0.00439408	0.00086203	0.168675	5	0.346846
11706.t00016	hypothetical protein					2.07791	2.14016	2.01601	1.99737	0.00527751	0.0100057	0.00450117	0.00737184	0.136645	46	0.443237
11706.t00017	NADH dehydrogenase subunit 7					2.64361	2.6551	2.62295	2.64441	0.000455213	0.000760244	0.000584429	0.00094139	-0.014734	26	0.436468
11706.t00018	Homologous with ORF324 of Sugar beet					2.7707	2.9433	2.69334	2.81777	0.00669925	0.0143723	0.00252393	0.00867325	0.753755	6	0.845079
11706.t00032	hypothetical protein					2.1696	2.05522	2.08183	1.99724	0.00303121	0.00308381	0.00549604	0.0093227	0.312218	32	0.620354
11706.t00033	Ribosomal protein S13					2.93629	2.98105	2.96853	3.00345	0.00103089	0.00350212	0.000595409	0.00248514	0.639796	34	0.784011
11706.t00034	Ribosomal protein S4					3.22167	3.32254	3.28473	3.34793	0.000873403	0.00766238	0.0013848	0.00376067	0.874152	3	0.844103
11706.t00037	Ribosomal protein L2					3.32185	3.26867	3.2988	3.2763	0.000556781	0.000137057	0.000751784	0.00161562	0.615976	14	0.604275
11706.t00038	Ribosomal protein S19					3.38554	3.32605	3.40342	3.37548	0.000577435	0.000658331	0.00151402	0.00241081	0.222661	13	0.667025
11706.t00039	NADH dehydrogenase subunit 4L					3.22139	3.22875	3.0954	3.07555	0.00034111	0.000641148	0.00135069	0.00183667	0.43278	46	0.282751
11706.t00040	hypothetical protein					1.6778	1.83165	1.79465	1.78191	0.0171906	0.0132187	0.010452	0.0163778	0.371072	2	0.642674
11706.t00042	Maturase-related protein					2.0139	2.0493	2.14957	2.16239	0.0081998	0.00588351	0.00285774	0.0056168	0.287105	34	0.41085
11706.t00045	Cytochrome c biogenesis Fc					3.20605	3.23066	3.13076	3.17313	0.000508803	0.00126314	0.000370538	0.0014534	0.337888	6	0.628989
11706.t00046	Containing pseudo trnC					1.96116	2.04156	1.90474	1.84958	0.012028	0.0216025	0.00168304	0.00726132	-0.0795338	23	0.607825
11706.t00052	NADH dehydrogenase subunit 2					2.10353	2.21354	2.02858	2.09741	0.00358425	0.00791761	0.00619	0.0103163	0.37363	3	0.72533
11706.t00055	Cytochrome c biogenesis B					2.80513	2.78014	2.74764	2.72421	0.000598386	0.00100941	0.000187934	0.000737585	0.215412	5	0.414248
11706.t00056	hypothetical protein					1.52847	1.63845	1.4774	1.52816	0.0315163	0.0158561	0.0250441	0.0393744	0.227751	36	0.613018
ChrSy.fgenesh.gene.29	expressed protein					1.97464	2.02727	2.07617	2.07534	0.0037178	0.00497346	0.00423413	0.00377124	0.0139193	10	0.769805
ChrSy.fgenesh.gene.37	expressed protein					2.80767	2.95532	2.79667	2.8508	0.00140196	0.00485172	0.00176501	0.00149041	0.801936	3	0.804533
ChrSy.fgenesh.gene.49	expressed protein					2.6515	2.65466	2.65301	2.63719	0.000901387	0.000821773	0.00141151	0.000843078	0.365145	16	0.401094
ChrSy.fgenesh.gene.50	expressed protein					1.67231	1.79777	1.46291	1.50394	0.00906126	0.00863387	0.0339623	0.0287286	0.161279	2	0.462398
ChrSy.fgenesh.gene.74	expressed protein					2.36726	2.31968	2.29616	2.24182	0.00514971	0.00214519	0.00362479	0.00841503	0.629933	28	0.83126
ChrUn.fgenesh.gene.96	expressed protein					2.65192	2.6138	2.63901	2.60151	0.00124877	0.00224888	0.00147257	0.00509312	0.422963	28	0.760046
LOC_Os01g01030	monocopper oxidase, putative, expressed					1.98168	2.14081	2.09496	2.06556	0.00978553	0.0120583	0.00318973	0.00474027	0.350351	16	0.745219
LOC_Os01g01050	R3H domain containing protein, expressed					2.79738	2.83839	2.80226	2.82641	0.0010406	0.00171855	0.00110749	0.000996085	0.585737	10	0.818537
LOC_Os01g01060	40S ribosomal protein S5, putative, expressed					2.70832	2.76359	2.63985	2.71171	0.00567798	0.00351413	0.00251499	0.00920106	0.329809	20	0.930844
LOC_Os01g01070	expressed protein					2.55784	2.58941	2.55324	2.55734	0.000625683	0.000469125	0.000746999	0.000264691	0.0987275	12	0.419788
LOC_Os01g01115	pentatricopeptide, putative, expressed					1.0675	1.25017	1.19156	1.11487	0.0202028	0.0212787	0.0368865	0.0481637	0.033105	31	0.592893
LOC_Os01g01120	enolase-phosphatase E1, putative, expressed					2.82818	2.64535	2.75987	2.44317	0.012244	0.0120235	0.00509973	0.0612985	0.880336	14	0.845702
LOC_Os01g01130	snurportin-1, putative, expressed					2.38868	2.30025	2.36222	2.31628	0.00231836	0.0043134	0.00124267	0.00509636	0.398626	14	0.772859
LOC_Os01g01160	heat shock protein DnaJ, putative, expressed			DnaJ domain protein C1	OsDjC1	2.83295	2.85031	2.7786	2.7523	0.00311555	0.0032998	0.00385995	0.0055872	0.765698	11	0.6483
LOC_Os01g01170	expressed protein					1.3693	1.49771	1.33951	1.35425	0.0483526	0.0340165	0.0999827	0.0909072	0.561112	24	0.687638
LOC_Os01g01280	expressed protein					2.85176	2.85439	2.86822	2.8445	0.0030707	0.00275672	0.000964598	0.001105	0.664297	16	0.681393
LOC_Os01g01290	histone-like transcription factor and archaeal histone, putative, expressed					1.47421	1.7065	1.51122	1.71076	0.0178375	0.0472154	0.0539899	0.0472184	0.373441	38	0.733471
LOC_Os01g01295	expressed protein					2.68118	2.71214	2.6783	2.71268	0.00166098	0.00116475	0.00159942	0.00125151	0.46664	9	0.48008
LOC_Os01g01302	shikimate kinase, putative, expressed			Shikimate kinase 4	OsSK4, OsSKL1	3.2228	3.11048	3.21161	3.16335	0.00136823	0.0045931	0.00474632	0.00261027	0.865241	1	0.958912
LOC_Os01g01307	translocon-associated protein beta domain containing protein, expressed					2.65042	2.65356	2.67571	2.66511	0.000845015	0.000878674	0.00156975	0.000948729	0.338963	23	0.666068
LOC_Os01g01312	retrotransposon protein, putative, Ty1-copia subclass, expressed			Cockayne syndrome WD-repeat protein	CSB, OsCBS	2.78615	2.80776	2.79755	2.81039	0.000819883	0.000623425	0.00052371	0.000460286	0.543051	26	0.736274
LOC_Os01g01330	retrotransposon protein, putative, Ty1-copia subclass, expressed					1.58288	1.72503	1.32881	1.60677	0.0329583	0.0203283	0.0438878	0.0258985	0.463869	7	0.665886
LOC_Os01g01340	light-induced protein 1-like, putative, expressed	LIGHT-REGULATED GENE 1	LIR1	light-regulated gene 1	Lir1	3.11937	3.22745	3.17849	3.18135	0.0204562	0.0148509	0.026542	0.0151599	0.901506	8	0.94631
LOC_Os01g01350	SNF7 domain containing protein, putative, expressed					1.48182	1.74365	1.42421	1.62414	0.0330002	0.0282133	0.0851375	0.0597813	0.660299	2	0.710198
LOC_Os01g01360	peptide transporter PTR2, putative, expressed					2.30385	2.47829	2.42593	2.47701	0.00651127	0.00593146	0.00331168	0.00313381	0.666463	3	0.855087
LOC_Os01g01369	3-beta-hydroxysteroid-Delta-isomerase, putative, expressed					2.38754	2.36053	2.41424	2.42379	0.00129646	0.00196591	0.00376265	0.0020036	0.384183	23	0.689742
LOC_Os01g01380	expressed protein					2.1161	2.09939	2.12124	2.15556	0.00306322	0.0032206	0.00363664	0.00546016	0.312447	45	0.475392
LOC_Os01g01390	expressed protein					2.5892	2.68916	2.56778	2.60668	0.00196394	0.00250779	0.00481532	0.0012768	0.816793	2	0.899669
LOC_Os01g01410	TKL_IRAK_C-LEC.1 - TKL_IRAK_C-LEC has homology to C-type lectin receptors, expressed					2.62969	2.67828	2.62653	2.66045	0.000514782	0.000564025	0.000625917	0.000975332	0.526649	4	0.787286
LOC_Os01g01420	expressed protein					3.16783	3.10863	3.14997	3.11758	0.000272673	0.00196948	0.00258819	0.0013374	0.79706	1	0.94005
LOC_Os01g01450	stress responsive protein, putative, expressed					3.27983	3.22076	3.2409	3.21149	0.000519189	0.00160455	0.00195829	0.00135848	0.831293	1	0.927051
LOC_Os01g01484	light-mediated development protein DET1, putative, expressed			DE-ETIOLATED1	OsDET1	2.94501	2.87179	2.93808	2.9111	0.000418812	0.0019831	0.00206392	0.000638063	0.719282	5	0.919427	DET1	light
LOC_Os01g01510	sas10/Utp3 family protein, expressed					2.72005	2.88954	2.63723	2.76822	0.00831202	0.00344746	0.00524579	0.0136886	0.838386	7	0.971535
LOC_Os01g01520	transferase family protein, putative, expressed					1.14879	1.28451	1.29993	1.31749	0.0220252	0.0193034	0.0485792	0.0276044	-0.0867435	16	0.503425
LOC_Os01g01570	kinesin heavy chain, putative, expressed					2.47831	2.57797	2.43594	2.50886	0.00164093	0.00162182	0.00220729	0.0034912	0.634989	4	0.859017
LOC_Os01g01580	expressed protein					0.988547	1.18169	0.981188	1.05444	0.0794585	0.070097	0.0433191	0.0455774	0.155035	16	0.538496
LOC_Os01g01600	ethylene-responsive protein related, putative, expressed			basic helix-loop-helix protein 071	OsbHLH071	1.18888	1.49132	1.14439	1.258	0.0498196	0.0517365	0.02942	0.0993151	0.436116	33	0.686947
LOC_Os01g01610	IscA-like iron-sulfur assembly protein, mitochondrial precursor, putative, expressed	IRON-SULFUR CLUSTER PROTEIN 9	ISC9	Iron-sulfur cluster protein 9	OsISC9	1.96508	2.2638	2.00749	2.11313	0.0103036	0.0203634	0.0187927	0.0172332	0.819134	12	0.89291
LOC_Os01g01620	kinase, pfkB family, putative, expressed					2.92274	2.95291	2.95441	2.90844	0.000689502	0.00151881	0.000682746	0.00163068	0.365875	48	0.436575
LOC_Os01g01640	Rer1 protein, putative, expressed					2.71297	2.72451	2.73339	2.72292	0.000904154	0.000739332	0.00116382	0.00102313	0.140449	22	0.378983
LOC_Os01g01650	isoflavone reductase homolog IRL, putative, expressed					2.46273	2.11723	2.76024	2.70705	0.10337	0.0433773	0.0196493	0.100904	0.846992	17	0.924714
LOC_Os01g01660	isoflavone reductase, putative, expressed					2.34493	2.18205	2.52708	2.54413	0.016237	0.0216994	0.0336675	0.0663992	0.453695	17	0.631937
LOC_Os01g01670	expressed protein					2.42572	2.58707	2.30103	2.44785	0.0132486	0.00483186	0.00591736	0.0162937	0.777883	7	0.932745
LOC_Os01g01680	expressed protein					2.50961	2.57332	2.59008	2.57258	0.00176763	0.00283898	0.000914008	0.000681352	0.293741	46	0.697051
LOC_Os01g01689	phosphatidylinositol 3- and 4-kinase family protein, expressed					2.68952	2.84029	2.6999	2.78107	0.00185889	0.00472658	0.00307325	0.00381539	0.886632	4	0.921429
LOC_Os01g01700	anaphase-promoting complex subunit 11, putative, expressed			RING-box protein		2.44574	2.46688	2.36328	2.36811	0.00318658	0.00319613	0.00204495	0.00297477	0.0896083	8	0.464946
LOC_Os01g01710	1-deoxy-D-xylulose 5-phosphate reductoisomerase, chloroplast precursor, putative, expressed			1-deoxy-D-xylulose 5-phosphate reductoisomerase, DXP reductoisomerase	OsDXR, DXR	3.49441	3.43493	3.46265	3.42418	0.000313307	0.00232145	0.00215886	0.000925406	0.914677	1	0.948389
LOC_Os01g01720	pex14, putative, expressed					3.01481	2.94215	3.01835	2.96734	0.000766831	0.00201789	0.00233756	0.00114357	0.821553	1	0.929066
LOC_Os01g01740	protein kinase domain containing protein, expressed					1.94771	2.01218	2.00902	2.05216	0.0110874	0.0145659	0.0147716	0.0153031	0.620912	24	0.782977
LOC_Os01g01780	exostosin family protein, putative, expressed					2.02984	2.06439	2.09803	2.15105	0.0115126	0.003454	0.00340017	0.00544139	0.380443	16	0.642897
LOC_Os01g01790	expressed protein					3.25903	3.23821	3.24229	3.22058	0.000324196	0.00146342	0.000627443	0.00229119	0.849085	13	0.774595
LOC_Os01g01840	helix-loop-helix DNA-binding domain containing protein, expressed					2.4584	1.83228	2.28346	1.68557	0.0396744	0.084214	0.0154012	0.0939175	0.68108	32	0.811395
LOC_Os01g01870	helix-loop-helix DNA-binding domain containing protein, expressed					3.03935	2.92159	3.08519	2.99084	0.00401806	0.00087343	0.0014635	0.00407372	0.810926	17	0.765765
LOC_Os01g01890	expressed protein					2.15926	1.96923	2.46877	2.28332	0.0240853	0.0430449	0.0148831	0.0308174	0.854435	17	0.830421
LOC_Os01g01910	expressed protein					1.05616	1.14443	1.15394	1.02631	0.0825707	0.0301964	0.0742254	0.0544736	0.147818	21	0.428598
LOC_Os01g01920	HD domain containing protein 2, putative, expressed					2.97285	3.01279	2.93867	2.92339	0.000814413	0.000615631	0.00163902	0.00307928	0.793973	9	0.690854
LOC_Os01g01970	expressed protein					2.51346	2.47486	2.56365	2.52329	0.00323564	0.00435894	0.00436601	0.00401136	0.797818	28	0.794199
LOC_Os01g02000	phosphate transporter 1, putative, expressed	PHOSPHATE TRANSPORTER 1;1	PHO1;1		OsPHO1;1	2.06506	2.13614	1.96456	1.96331	0.00710702	0.00760512	0.0092609	0.0305064	0.0875867	36	0.504886
LOC_Os01g02010	expressed protein	ARABINOGALACTAN PROTEIN 12	AGP12	Arabinogalactan protein 12	OsAGP12	2.29456	1.90712	2.50898	2.38545	0.0161694	0.118729	0.00483405	0.0217651	0.82069	1	0.804418
LOC_Os01g02020	acetyl-CoA acetyltransferase, cytosolic, putative, expressed					2.77531	2.71715	2.65595	2.61657	0.00437753	0.00698268	0.00397911	0.00242547	0.775723	1	0.741005
LOC_Os01g02040	retrotransposon protein, putative, unclassified, expressed					2.10585	2.25304	2.13104	2.17985	0.00407985	0.00474723	0.0131503	0.01776	0.740493	2	0.791634
LOC_Os01g02050	phosphoenolpyruvate carboxylase, putative, expressed			phosphoenolpyruvate carboxylase b, PEPCase b	Osppc-b	2.22622	2.1614	2.34323	2.32722	0.0136875	0.0068971	0.00354125	0.00506982	0.675947	25	0.713381
LOC_Os01g02060	TOO MANY MOUTHS precursor, putative, expressed					1.57469	1.7609	1.85017	1.93922	0.0619584	0.0556459	0.0111915	0.0289505	0.500086	16	0.842658
LOC_Os01g02080	peptidyl-prolyl cis-trans isomerase, putative, expressed	CYCLOPHILIN 26-2	CYP26-2	cyclophilin 26-2, cyclophilin 1	OsCYP26-2, OsCYP-1, OsCYP26-1	3.09256	2.87405	3.13689	2.98051	0.0111612	0.00776177	0.00203556	0.0226561	0.88524	14	0.925826
LOC_Os01g02090	expressed protein			Sm gene, Sm family protein		2.93099	2.92159	2.94648	2.92354	0.00154503	0.000601678	0.00102678	0.00223663	0.716934	21	0.909531
LOC_Os01g02100	transposon protein, putative, unclassified, expressed					2.44566	2.50448	2.46935	2.49088	0.00188676	0.00187053	0.00235049	0.00299134	0.682919	8	0.810531
LOC_Os01g02130	expressed protein					1.86402	1.35379	1.96706	1.70345	0.0340661	0.099242	0.0211788	0.0225385	0.58406	27	0.778026
LOC_Os01g02139	expressed protein					1.84268	1.56209	1.76827	1.70163	0.0196047	0.00686221	0.0166991	0.0398169	0.501855	17	0.840231
LOC_Os01g02150	sulfated surface glycoprotein 185 precursor, putative, expressed					2.71922	2.51054	2.71921	2.65389	0.00918638	0.00396518	0.0059094	0.0265373	0.825418	17	0.917599
LOC_Os01g02170	expressed protein					1.683	1.97202	1.4774	1.79595	0.019386	0.0119049	0.0169043	0.0408529	0.631361	4	0.868156
LOC_Os01g02180	expressed protein					2.45672	2.50617	2.4337	2.45903	0.00116279	0.00298222	0.00214644	0.00276618	0.425531	31	0.731059
LOC_Os01g02200	armadillo/beta-catenin repeat family protein, putative, expressed					2.98265	3.00879	3.00376	2.9969	0.000653483	0.00135663	0.000913501	0.00051223	0.619527	8	0.826838
LOC_Os01g02290	Ser/Thr receptor-like kinase, putative, expressed	RECEPTOR-LIKE CYTOPLASMIC KINASE 2	RLCK2	Receptor-like Cytoplasmic Kinase 2	OsRLCK2	1.20788	0.946297	1.43343	1.02812	0.0533418	0.0618578	0.116982	0.149582	0.375724	27	0.765792
LOC_Os01g02300	receptor kinase ORK10, putative, expressed	RECEPTOR-LIKE CYTOPLASMIC KINASE 3	RLCK3	Receptor-like Cytoplasmic Kinase 3	OsRLCK3	1.07256	0.799176	1.3324	0.831806	0.0383893	0.0821801	0.162847	0.142156	0.426481	32	0.665293
LOC_Os01g02310	expressed protein					1.70467	1.96403	1.85601	1.95141	0.0179381	0.0218076	0.00715446	0.0217934	0.0699435	38	0.707365
LOC_Os01g02320	protein kinase domain containing protein, expressed	RECEPTOR-LIKE CYTOPLASMIC KINASE 4	RLCK4	Receptor-like Cytoplasmic Kinase 4	OsRLCK4	1.5884	1.67573	1.62458	1.66753	0.0202592	0.0238283	0.0246336	0.0159342	0.0858112	33	0.512752
LOC_Os01g02350	receptor-like kinase ARK1AS, putative, expressed					1.77474	1.79649	1.75745	1.68391	0.0156683	0.0222446	0.0146569	0.00939709	0.0294941	23	0.694118
LOC_Os01g02360	resistance-related receptor-like kinase, putative, expressed					1.59372	1.65656	1.54909	1.46951	0.0107638	0.00633599	0.0287665	0.0238076	-0.137052	36	0.536854
LOC_Os01g02390	protein kinase domain containing protein, expressed	RECEPTOR-LIKE CYTOPLASMIC KINASE 5	RLCK5	Receptor-like Cytoplasmic Kinase 5	OsRLCK5	1.8341	1.94916	2.01996	1.84936	0.0995756	0.0636226	0.173774	0.141035	-0.0474497	53	0.909183
LOC_Os01g02400	protein kinase domain containing protein, expressed	RECEPTOR-LIKE CYTOPLASMIC KINASE 6	RLCK6	Receptor-like Cytoplasmic Kinase 6	OsRLCK6	1.93135	2.07108	2.06785	1.98346	0.0188221	0.0232566	0.0313322	0.0250942	0.170912	53	0.827939
LOC_Os01g02440	Ser/Thr receptor-like kinase, putative, expressed					1.55407	1.92794	1.62212	1.82861	0.0876288	0.0202658	0.0703952	0.0930045	0.684687	2	0.830557
LOC_Os01g02490	expressed protein					0.940424	1.31511	1.11269	1.10345	0.065369	0.077749	0.136383	0.0927689	0.164695	53	0.733394
LOC_Os01g02550	protein kinase domain containing protein, expressed	RECEPTOR-LIKE CYTOPLASMIC KINASE 10	RLCK10	Receptor-like Cytoplasmic Kinase 10	OsRLCK10	1.34774	1.51451	1.28802	1.40964	0.0707806	0.0619844	0.0714184	0.125136	0.405224	23	0.684932
LOC_Os01g02560	Ser/Thr receptor-like kinase, putative, expressed	RECEPTOR-LIKE CYTOPLASMIC KINASE 11	RLCK11	Receptor-like Cytoplasmic Kinase 11	OsRLCK11	2.06018	2.38433	2.115	2.13594	0.0921194	0.0328103	0.0249597	0.0993219	0.171994	2	0.655868
LOC_Os01g02570	protein kinase domain containing protein, expressed					2.62635	2.57383	2.6311	2.6212	0.00760516	0.0106635	0.0130886	0.0180677	0.171959	24	0.605123
LOC_Os01g02580	protein kinase domain containing protein, expressed			Tak Receptor-Like Kinase 2, Receptor-like Cytoplasmic Kinase 12	Os8Tak2, YK21, OsRLCK12, RLCK12	2.09882	2.15866	2.24248	2.25266	0.0149781	0.0183562	0.0217295	0.0523694	0.558357	24	0.818265
LOC_Os01g02590	receptor-like kinase, putative, expressed			Tak Receptor-Like Kinase 1	Os8Tak1	2.17519	2.28895	2.29258	2.37325	0.00955135	0.0119685	0.0152273	0.0206496	0.500477	36	0.866023
LOC_Os01g02600	Ser/Thr receptor-like kinase, putative, expressed					2.05607	2.01715	2.1542	2.19862	0.00870061	0.0374682	0.0123358	0.0109195	0.471988	40	0.819687
LOC_Os01g02610	protein kinase domain containing protein, expressed			Tak Receptor-Like Kinase 3	Os8Tak3	1.58897	1.59372	1.60775	1.64312	0.0286475	0.0478914	0.0458117	0.041584	-0.212759	23	0.436084
LOC_Os01g02690	resistance-related receptor-like kinase, putative, expressed	RECEPTOR-LIKE CYTOPLASMIC KINASE 14	RLCK14	Receptor-like Cytoplasmic Kinase 14	OsRLCK14	1.25822	1.41001	1.2501	1.25558	0.0236006	0.0117083	0.0254429	0.0275226	0.0904778	4	0.410553
LOC_Os01g02700	protein kinase domain containing protein, expressed					2.13037	2.39596	2.01598	2.06386	0.0213623	0.00378795	0.0310777	0.0657396	0.65987	31	0.785866
LOC_Os01g02710	LRk-type protein, putative, expressed					2.12777	2.40476	2.04423	2.21181	0.0114208	0.00821702	0.0358907	0.052336	0.774514	2	0.871268
LOC_Os01g02720	elongation factor Tu, putative, expressed					2.45797	2.49998	2.40773	2.42305	0.000689081	0.000904334	0.00191764	0.00412189	0.289781	31	0.782524
LOC_Os01g02730	TAK14, putative, expressed					1.24768	1.44895	1.31805	1.35392	0.0584139	0.0207563	0.0467195	0.0210365	0.0236126	10	0.435806
LOC_Os01g02750	protein kinase domain containing protein, expressed					1.74649	1.7928	1.57563	1.59862	0.0452599	0.0223938	0.0595843	0.0277058	-0.264125	18	0.566508
LOC_Os01g02760	receptor-like kinase, putative, expressed	RECEPTOR-LIKE CYTOPLASMIC KINASE 15	RLCK15	Receptor-like Cytoplasmic Kinase 15	OsRLCK15	2.00746	2.02943	1.97402	2.03838	0.00960711	0.0387061	0.0203663	0.0200226	0.49104	24	0.742713
LOC_Os01g02770	resistance-related receptor-like kinase, putative, expressed					1.91338	2.00318	1.8947	2.06788	0.0234154	0.0345027	0.042626	0.0172439	0.470975	10	0.724312
LOC_Os01g02800	receptor-like kinase ARK1AS, putative, expressed	RECEPTOR-LIKE CYTOPLASMIC KINASE 18	RLCK18	Receptor-like Cytoplasmic Kinase 18	OsRLCK18	1.05269	1.24536	1.12358	1.20673	0.0212237	0.061174	0.0440556	0.102371	0.205601	36	0.663851
LOC_Os01g02810	resistance-related receptor-like kinase, putative, expressed					0.905218	1.17101	1.00736	1.13971	0.0339836	0.0305776	0.0317188	0.0524145	0.384792	3	0.576523
LOC_Os01g02830	receptor-like kinase ARK1AS, putative, expressed					1.15228	1.38269	1.44732	1.49318	0.0163447	0.0573438	0.0558088	0.0265055	0.234402	2	0.674354
LOC_Os01g02840	resistance-related receptor-like kinase, putative, expressed					1.18889	1.40787	1.27199	1.42439	0.0246774	0.0475469	0.0981579	0.0644804	0.419071	2	0.753228
LOC_Os01g02860	expressed protein					1.49231	1.80822	1.48242	1.6105	0.0175054	0.0452897	0.0201684	0.043128	0.742491	2	0.811725
LOC_Os01g02870	auxin-induced protein 5NG4, putative, expressed					2.65805	2.90361	2.94426	2.97606	0.0119197	0.018227	0.00401937	0.00808234	0.689483	16	0.897158
LOC_Os01g02880	fructose-bisphospate aldolase isozyme, putative, expressed			Aldolase		2.74527	2.75433	2.76433	2.76465	0.00300465	0.000447879	0.00141145	0.00104416	0.555472	9	0.531831
LOC_Os01g02900	glycosyltransferase, putative, expressed					3.13593	2.97645	3.19891	3.11367	0.0120712	0.013487	0.00582226	0.0134081	0.79287	17	0.939885
LOC_Os01g02910	glycosyltransferase, putative, expressed					1.40178	1.40525	1.44821	1.37259	0.0719048	0.0223599	0.0154482	0.0263293	0.150273	41	0.417524
LOC_Os01g02920	glycosyltransferase protein, putative, expressed					2.44035	2.42661	2.49947	2.46778	0.0034495	0.00456777	0.00216647	0.00204163	0.222752	41	0.597574
LOC_Os01g02930	glycosyltransferase protein, putative, expressed					1.28907	1.58732	1.6374	1.55704	0.16945	0.0271658	0.014391	0.0694921	0.53289	16	0.689525
LOC_Os01g02940	glycosyltransferase protein, putative, expressed					2.88096	2.86598	3.02079	2.98999	0.0163449	0.00282719	0.00415764	0.015134	0.782907	25	0.936451
LOC_Os01g02960	expressed protein					2.26001	2.33	2.60967	2.61796	0.00526837	0.00829019	0.00123212	0.0015926	0.109663	51	0.486239
LOC_Os01g03020	tRNA synthetase class I, putative, expressed					3.03627	3.05689	3.09826	3.08991	0.00233257	0.00121763	0.000513051	0.00211257	0.746842	29	0.778708
LOC_Os01g03030	alanyl-tRNA synthetase, putative, expressed					2.52269	2.5502	2.57268	2.57925	0.000629991	0.00121352	0.00111104	0.00189707	0.187617	33	0.67969
LOC_Os01g03040	expressed protein					3.21288	3.12218	3.14682	3.11219	0.000835758	0.00531501	0.0037327	0.00127351	0.850393	1	0.954473
LOC_Os01g03050	fruit protein PKIWI502, putative, expressed					2.15176	2.12732	2.07489	2.11858	0.00440227	0.00420284	0.00481069	0.00231846	0.294921	51	0.523464
LOC_Os01g03060	splicing factor, putative, expressed					2.91987	2.94267	2.9597	2.94545	0.000481932	0.00131264	0.000962244	0.000774212	0.685973	8	0.861603
LOC_Os01g03070	transposon protein, putative, unclassified, expressed					3.21339	3.27561	3.20078	3.25228	0.00129589	0.000974568	0.000857309	0.00281272	0.790521	7	0.95686
LOC_Os01g03090	methyltransferase, putative, expressed					2.64342	2.62926	2.5988	2.57662	0.00129247	0.000740136	0.00257601	0.00290266	0.506651	21	0.745995
LOC_Os01g03100	protein binding protein, putative, expressed					2.34766	2.44794	2.39205	2.39142	0.00069371	0.000830633	0.0036374	0.00325753	0.477002	46	0.672396
LOC_Os01g03110	expressed protein					2.67796	2.68308	2.66126	2.67722	0.0029462	0.00125883	0.00105181	0.000814078	0.557529	20	0.313547
LOC_Os01g03130	expressed protein					1.23314	1.12517	1.0841	1.07529	0.0783143	0.0621194	0.0524957	0.0284026	0.333761	1	0.356374
LOC_Os01g03144	white-brown complex homolog protein 7, putative, expressed	ABC TRANSPORTER G FAMILY MEMBER 1	ABCG1	ABC transporter superfamily ABCG subgroup member 1	OsABCG1	3.05448	3.06203	3.02163	3.04216	0.00342923	0.00187408	0.00321263	0.00245967	0.919979	18	0.878627
LOC_Os01g03160	xylosyltransferase, putative, expressed					2.60014	2.61243	2.65591	2.64428	0.000815101	0.000345341	0.000380897	0.00059085	0.299784	16	0.614145
LOC_Os01g03180	retrotransposon protein, putative, unclassified, expressed					1.8248	2.02699	1.96244	2.07862	0.0132917	0.0306171	0.013122	0.00347592	0.618205	26	0.852508
LOC_Os01g03310	BBTI1 - Bowman-Birk type bran trypsin inhibitor precursor, expressed	BOWMAN-BIRK INHIBITOR 2-2	RBBI2-2			3.36915	3.29527	3.3354	3.11561	0.0214927	0.0111224	0.014332	0.0204761	0.651313	32	0.649502
LOC_Os01g03320	BBTI2 - Bowman-Birk type bran trypsin inhibitor precursor, expressed	BOWMAN-BIRK INHIBITOR 2-1	RBBI2-1			2.93654	2.63282	2.84766	2.31925	0.0617085	0.0673695	0.0396613	0.0916782	0.556243	42	0.782121
LOC_Os01g03330	BBTI3 - Bowman-Birk type bran trypsin inhibitor precursor, expressed	BOWMAN-BIRK INHIBITOR 3-2	RBBI3-2			1.10297	0.573975	1.52256	0.820221	0.189844	0.0844334	0.106644	0.153418	0.416444	42	0.830902
LOC_Os01g03340	BBTI4 - Bowman-Birk type bran trypsin inhibitor precursor, expressed	BOWMAN-BIRK INHIBITOR 3-1	RBBI3-1	Bowman-Birk type bran trypsin inhibitor 4	RBBI3-1, OsBBTI4	1.7314	1.34302	1.99118	1.19261	0.124519	0.10975	0.113778	0.178344	0.469795	32	0.725256
LOC_Os01g03390	BBTI7 - Bowman-Birk type bran trypsin inhibitor precursor, expressed	BOWMAN-BIRK INHIBITOR 2-3	RBBI2-3			2.3757	1.70575	2.61846	1.83053	0.0759605	0.0462615	0.0458056	0.157675	0.62252	32	0.856919
LOC_Os01g03490	heavy-metal-associated domain-containing protein, putative, expressed					1.79429	2.03985	1.83946	1.9784	0.00801294	0.0109263	0.0105957	0.00606462	0.642814	2	0.835628
LOC_Os01g03500	expressed protein					2.39333	2.4977	2.37828	2.43682	0.00133464	0.00235881	0.00377137	0.00276767	0.589898	2	0.878061
LOC_Os01g03510	WD domain, G-beta repeat domain containing protein, expressed			Actin-interacting protein 1	AIP1, OsAIP1,OsWD40-1	2.76565	2.79097	2.79734	2.81044	0.0010769	0.00184676	0.00202635	0.00206016	0.81045	33	0.745419
LOC_Os01g03549	multi-copper oxidase type I family protein, putative, expressed					3.00163	2.8951	2.83458	2.85641	0.0033144	0.00699349	0.0156524	0.00458488	0.843876	11	0.953942
LOC_Os01g03570	transcription factor X1, putative, expressed					2.3069	2.29545	2.46334	2.51575	0.00589803	0.00721732	0.0021495	0.00327816	0.371528	18	0.654274
LOC_Os01g03650	sufB/sufD domain containing protein, putative, expressed	ABC TRANSPORTER I FAMILY MEMBER 4	ABCI4	ABC transporter superfamily ABCI subgroup member 4, Iron-sulfur cluster protein 18	OsABCI4, OsISC18	2.89057	2.89616	2.95933	2.94891	0.000732305	0.000785678	0.000694818	0.0036714	0.180092	20	0.447826
LOC_Os01g03660	MYB family transcription factor, putative, expressed					2.1656	2.26152	2.32496	2.24039	0.0205795	0.0215943	0.0126117	0.0235722	0.713999	34	0.792338
LOC_Os01g03680	BBTI8 - Bowman-Birk type bran trypsin inhibitor precursor, expressed					1.18233	0.909134	1.37146	0.784574	0.18457	0.202058	0.178108	0.198984	0.264611	35	0.647674
LOC_Os01g03690	TKL_IRAK_DUF26-lg.1 - DUF26 kinases have homology to DUF26 containing loci, expressed	RECEPTOR-LIKE CYTOPLASMIC KINASE 19	RLCK19	Receptor-like Cytoplasmic Kinase 19	OsRLCK19	2.39205	2.34011	2.33143	2.32391	0.00491031	0.00359251	0.00288917	0.00893612	0.604238	42	0.435727
LOC_Os01g03710	mannose-6-phosphate isomerase, putative, expressed					1.68239	1.49911	1.87606	1.51993	0.0801257	0.0317609	0.0546467	0.12367	0.607379	21	0.849082
LOC_Os01g03730	nuclease PA3, putative, expressed			bifunctional nuclease		2.35444	2.42095	2.24812	2.30564	0.0199926	0.0124291	0.010068	0.0225143	0.596926	52	0.526889
LOC_Os01g03740	nuclease PA3, putative, expressed					2.33383	2.06889	2.1754	2.18389	0.0402123	0.0372925	0.0240855	0.0178104	0.72461	1	0.790563
LOC_Os01g03750	expressed protein					1.62299	1.64569	1.40609	1.43911	0.0182476	0.0193332	0.0285429	0.00607339	0.36084	9	0.582374	ABA4	drought/light
LOC_Os01g03760	expressed protein					2.78127	2.82221	2.77169	2.77279	0.00142638	0.00103455	0.00186278	0.00304487	0.650555	36	0.911245
LOC_Os01g03810	expressed protein					2.24434	2.22422	2.20839	2.17516	0.00124454	0.00730176	0.00122431	0.0037446	0.476053	19	0.40027
LOC_Os01g03820	C2 domain containing protein, putative, expressed					3.19399	3.21207	3.15403	3.15413	0.000523799	0.00115234	0.00102238	0.00191516	0.740376	37	0.584124
LOC_Os01g03870	expressed protein					1.81162	1.55492	2.00242	1.7954	0.0190571	0.0317302	0.0355447	0.0611022	0.742933	21	0.830822
LOC_Os01g03914	cation efflux family protein, putative, expressed			metal tolerance protein 9	OsMTP9	2.68213	2.57739	2.68218	2.66367	0.00118025	0.00128027	0.00152846	0.00242144	0.481703	32	0.718365
LOC_Os01g03940	expressed protein					3.04674	2.88702	2.99796	2.94715	0.00175595	0.00836671	0.0026719	0.0148546	0.855329	15	0.7215
LOC_Os01g03950	glycosyl hydrolase, family 31, putative, expressed					2.54426	2.38073	2.46155	2.2433	0.00757623	0.0167644	0.0135666	0.0132692	0.826267	17	0.758835
LOC_Os01g03980	expressed protein					1.83052	1.87079	1.96473	2.0261	0.041419	0.013858	0.0266821	0.024249	0.681152	29	0.820748
LOC_Os01g04010	expressed protein					2.62211	2.59919	2.63608	2.61745	0.00198599	0.00119635	0.00158058	0.00297776	0.480977	45	0.517679
LOC_Os01g04020	AP2 domain containing protein, expressed	ETHYLENE RESPONSE FACTOR 108	ERF108	APETALA2, ethylene response factor 108, APETALA2/ethylene-responsive element binding protein 1	OsAP2, OsERF#108, OsERF108, AP2/EREBP#001, AP2/EREBP1	3.16348	3.20372	3.15219	3.17332	0.00065248	0.00211423	0.00435957	0.00411457	0.74191	31	0.852175
LOC_Os01g04030	signal peptidase complex subunit 3, putative, expressed					2.2384	2.30936	2.228	2.27454	0.00178747	0.00288434	0.00915862	0.00466267	0.487657	6	0.809475
LOC_Os01g04050	BBTI12 - Bowman-Birk type bran trypsin inhibitor precursor, expressed			incompatible strain of P. avenae-induced gene 2	IAI2	2.97678	2.26081	2.97343	2.51122	0.0467062	0.113594	0.0102278	0.0795503	0.74607	14	0.794371
LOC_Os01g04070	verticillium wilt disease resistance protein, putative, expressed			Leucine-rich repeat receptor-like kinase		1.21341	1.38728	1.34979	1.59083	0.0564052	0.0449366	0.120869	0.0607813	0.450801	10	0.794284
LOC_Os01g04100	expressed protein					1.79877	1.7774	1.88001	1.90799	0.0105104	0.0123561	0.026202	0.0153807	0.462741	24	0.65663
LOC_Os01g04110	mediator of RNA polymerase II transcription subunit 22, putative, expressed					1.7933	1.77055	1.71988	1.7576	0.00791436	0.00575287	0.00768246	0.0131373	0.301741	20	0.416686
LOC_Os01g04120	ZOS1-03 - C2H2 zinc finger protein, expressed					1.54505	1.62958	1.61743	1.70263	0.0127026	0.0392866	0.0232902	0.0108578	0.288529	34	0.670199
LOC_Os01g04130	peptidyl-tRNA hydrolase, mitochondrial precursor protein, putative, expressed					1.53738	1.66012	1.36887	1.44076	0.00592446	0.0110424	0.0713249	0.0534006	0.341086	2	0.606809
LOC_Os01g04160	expressed protein					1.47125	1.62549	1.5594	1.47098	0.0218163	0.0221814	0.0316939	0.0419365	0.373191	43	0.505968
LOC_Os01g04190	transporter family protein, putative, expressed	PLASTIDIC GLUCOSE TRANSLOCATOR	PGLCT		OsPGLCT	2.95354	2.87776	2.92956	2.83736	0.000431793	0.000829273	0.000573497	0.00133067	0.847303	14	0.859992
LOC_Os01g04200	metallo-beta-lactamase family protein, putative, expressed					2.57786	2.73821	2.56574	2.62116	0.00373186	0.00532129	0.00503275	0.0114261	0.891109	9	0.875818
LOC_Os01g04230	inactive receptor kinase At2g26730 precursor, putative, expressed					1.66072	1.66347	1.60407	1.81802	0.0425196	0.00986901	0.0209718	0.0241551	0.577305	37	0.556297
LOC_Os01g04250	expressed protein					1.23659	1.3514	1.13846	1.30937	0.0516156	0.0393898	0.107786	0.0276948	0.283081	34	0.615739
LOC_Os01g04260	fatty acid hydroxylase, putative, expressed			Sterol methyltransferase 1, Dwarf 7	OsSTE1, OsDWF7	2.96484	2.85329	2.93292	2.90529	0.00454287	0.01083	0.0101847	0.0086784	0.897371	1	0.901547
LOC_Os01g04280	calmodulin binding protein, putative, expressed			Calmodulin binding protein		2.02788	1.68325	1.95793	1.699	0.0329263	0.0959492	0.0401576	0.0840461	0.663137	27	0.843894
LOC_Os01g04300	glycosyl hydrolase family 10 protein, putative, expressed					1.22816	1.12141	1.90574	1.67488	0.121756	0.0533268	0.0277709	0.099119	0.588918	17	0.754026
LOC_Os01g04324	expressed protein					1.09627	1.34573	1.17998	1.42223	0.0587523	0.0844433	0.152346	0.0518884	0.348184	34	0.779592
LOC_Os01g04330	OsCML16 - Calmodulin-related calcium sensor protein, expressed	CALMODULIN-LIKE PROTEIN 16	CML16	calmodulin-like protein 16	OsCML16	2.47063	2.47269	2.43888	2.45396	0.0136106	0.0114965	0.00731266	0.00526645	0.700834	9	0.323436
LOC_Os01g04350	hsp20/alpha crystallin family protein, putative, expressed	17.9 KDA HEAT SHOCK PROTEIN 2	HSP17.9B	17.9 kDa heat shock protein 2	Oshsp17.9B., OsHsp17.9B	3.04912	2.99696	3.18774	3.18417	0.00147197	0.00129945	0.000619386	0.00273928	0.612714	43	0.567271	OsHsp17.9B-CIX	temperature
LOC_Os01g04409	OsWAK1 - OsWAK receptor-like cytoplasmic kinase OsWAK-RLCK, expressed	WALL-ASSOCIATED KINASE GENE 1	WAK1	Wall-Associated kinase 1	OsWAK1, WAK-1	2.7842	2.72516	2.59627	2.54306	0.00103615	0.00158439	0.00193508	0.00206717	0.410341	42	0.668904
LOC_Os01g04450	OsWAK2 - OsWAK receptor-like cytoplasmic kinase OsWAK-RLCK, expressed	WALL-ASSOCIATED KINASE GENE 2	WAK2	Wall-Associated kinase 2	OsWAK2	1.96383	2.12828	2.05474	2.13613	0.0125958	0.0199968	0.0368411	0.0386245	0.747242	10	0.915683
LOC_Os01g04460	Ser/Thr protein kinase, putative, expressed					1.32131	1.48296	1.2905	1.44302	0.0366306	0.0249629	0.143617	0.0943222	0.373853	23	0.706554
LOC_Os01g04470	expressed protein					1.16909	1.42906	1.39347	1.45997	0.0480718	0.0911647	0.0820004	0.10694	0.599858	10	0.841889
LOC_Os01g04480	expressed protein	RECEPTOR-LIKE CYTOPLASMIC KINASE 20	RLCK20	Receptor-like Cytoplasmic Kinase 20	OsRLCK20	1.8538	1.98235	1.94977	2.00569	0.0182632	0.0522514	0.0643875	0.0919226	0.757957	23	0.844078
LOC_Os01g04490	Ser/Thr protein kinase, putative, expressed	RECEPTOR-LIKE CYTOPLASMIC KINASE 21	RLCK21	Receptor-like Cytoplasmic Kinase 21	OsRLCK21	1.75519	1.8928	1.74424	1.81803	0.00252619	0.00789292	0.0176239	0.0069847	0.304271	6	0.710934
LOC_Os01g04500	expressed protein					1.46954	1.54364	1.21061	1.29032	0.0107795	0.00848862	0.0518301	0.028462	0.0734388	6	0.399085
LOC_Os01g04520	Ser/Thr protein kinase, putative, expressed	RECEPTOR-LIKE CYTOPLASMIC KINASE 22	RLCK22	Receptor-like Cytoplasmic Kinase 22	OsRLCK22	1.817	2.06146	1.19361	1.31757	0.0543472	0.0260781	0.145243	0.132176	0.535993	2	0.632678
LOC_Os01g04570	Ser/Thr protein kinase, putative, expressed					1.8325	1.73233	1.8345	1.70772	0.00213824	0.029288	0.0065958	0.022026	0.434287	5	0.645759
LOC_Os01g04590	expressed protein					2.68962	2.69162	2.54978	2.58161	0.0162808	0.0188705	0.0530424	0.0618636	0.952428	9	0.824994
LOC_Os01g04600	expressed protein					1.32468	1.58334	1.01108	0.970193	0.0228962	0.03477	0.0642643	0.0625164	0.382994	2	0.547182
LOC_Os01g04630	muconate cycloisomerase, putative, expressed					2.97687	2.97888	2.843	2.8098	0.00292461	0.00230564	0.00441079	0.004519	0.541767	31	0.534029
LOC_Os01g04640	reticulon domain containing protein, putative, expressed					2.81289	2.88169	2.79723	2.77947	0.000823797	0.00103431	0.00302711	0.00428399	0.65143	46	0.636395
LOC_Os01g04650	PB1 domain containing protein, expressed					2.84082	2.90898	2.81974	2.85426	0.00137544	0.001566	0.00580339	0.00538967	0.838427	31	0.916693
LOC_Os01g04670	expressed protein					1.87042	1.55619	2.05798	1.74208	0.0136444	0.0148773	0.0218688	0.0424342	0.719528	32	0.768563
LOC_Os01g04710	aspartic proteinase, putative, expressed					1.22011	1.47781	1.74841	1.71119	0.123488	0.0623954	0.0284078	0.0272425	0.682874	16	0.857322
LOC_Os01g04720	leucine-rich repeat protein-related, putative, expressed			putative leucine rich repeat protein	PLRRP	2.04275	1.9012	2.18022	2.16469	0.025002	0.0066133	0.00835108	0.0187436	0.673999	17	0.804677
LOC_Os01g04730	ribosomal protein L24, putative, expressed			Ribosomal protein L26		1.97569	2.12613	1.75659	1.88428	0.00873934	0.00482258	0.0162013	0.0191598	0.406624	6	0.825173
LOC_Os01g04800	B3 DNA binding domain containing protein, expressed	APETALA2/ETHYLENE-RESPONSIVE ELEMENT BINDING PROTEIN 129	AP2/EREBP129	APETALA2/ethylene-responsive element binding protein 129	AP2/EREBP#129	1.97943	1.22295	1.93636	1.60607	0.0872066	0.075087	0.0638331	0.0715061	0.829084	30	0.853774
LOC_Os01g04814	vacuolar protein sorting-associating protein 4B, putative, expressed					3.08285	3.01915	3.09633	3.06734	0.00020778	0.000511456	0.000328075	0.000282227	0.774138	14	0.881994
LOC_Os01g04860	DUF647 domain containing protein, putative, expressed					2.7208	2.74809	2.66075	2.67896	0.0021641	0.000948817	0.00190604	0.00165249	0.451792	51	0.445153
LOC_Os01g04870	WD domain, G-beta repeat domain containing protein, expressed			UV-damaged DNA binding protein 2, Ultraviolet-damaged DNA binding protein 2	OsWD40-2, UV-DDB2, OsUV-DDB2	2.77047	2.74807	2.64871	2.69213	0.00354303	0.00231567	0.00496688	0.00254642	0.821265	18	0.889185	OsUV-DDB2	light
LOC_Os01g04880	retrotransposon protein, putative, unclassified, expressed					2.47107	2.58759	2.54357	2.59549	0.001475	0.00228881	0.00392709	0.001205	0.802744	3	0.864724
LOC_Os01g04900	peptidase M50 family protein, putative, expressed					2.87935	2.87387	2.81771	2.79677	0.00103583	0.00103068	0.00208515	0.00103604	0.577989	48	0.753433
LOC_Os01g04910	TP53RK-binding protein, putative, expressed					2.17237	2.10526	2.05059	2.07327	0.00361129	0.00702571	0.00490733	0.00587368	0.185253	11	0.550655
LOC_Os01g04920	glycosyl transferase, group 1 domain containing protein, expressed			sulfoquinovosyldiacylglycerol 2	OsSQD2	2.91269	3.09941	2.7228	2.67386	0.0242677	0.0276132	0.0450443	0.0330424	0.84155	52	0.852534
LOC_Os01g04930	MYB family transcription factor, putative, expressed			MYB transcription factor		2.62966	2.68707	2.61561	2.61972	0.00153873	0.0026337	0.00118066	0.00120527	0.553931	10	0.802039
LOC_Os01g04950	peptide transporter PTR2, putative, expressed	PROTEIN TRANSPORTER 7	PTR7		OsPTR7	2.60582	2.62978	2.6092	2.62361	0.00960576	0.0110795	0.0113829	0.00578946	0.673975	8	0.841452
LOC_Os01g04990	mitochondrial carrier protein, putative, expressed					2.79832	2.74318	2.81472	2.83598	0.00433481	0.00289451	0.00419147	0.00403513	0.692687	11	0.876955
LOC_Os01g05010	mitochondrial glycoprotein, putative, expressed					2.06833	2.27857	1.94117	2.05713	0.0172405	0.0142738	0.0124146	0.0264313	0.71644	7	0.909607
LOC_Os01g05060	mitochondrial glycoprotein, putative, expressed					2.29888	2.54326	2.42502	2.51069	0.0104697	0.0400438	0.0326131	0.0197645	0.761102	34	0.957266
LOC_Os01g05064	expressed protein					2.29536	1.85364	2.49488	2.26725	0.065615	0.0403835	0.00385134	0.0360958	0.915922	41	0.925826
LOC_Os01g05070	expressed protein					2.49965	2.4988	2.52077	2.51944	0.00159194	0.000847131	0.00123468	0.00149469	0.31462	36	0.172897
LOC_Os01g05080	thylakoid lumenal protein, putative, expressed					2.94423	2.85274	2.9212	2.82151	0.0138326	0.00438574	0.00172037	0.0168581	0.73256	50	0.865553
LOC_Os01g05090	expressed protein					1.35094	1.42849	0.655449	0.720815	0.04614	0.0603749	0.117677	0.106134	0.0348192	24	0.657014
LOC_Os01g05105	expressed protein					2.39534	2.39912	2.35759	2.37723	0.00144131	0.000960235	0.0017213	0.00211819	0.121778	43	0.42237
LOC_Os01g05130	expressed protein					2.31912	2.34194	2.35123	2.35653	0.00143237	0.00078226	0.00176053	0.000842636	-0.0551441	31	0.503191
LOC_Os01g05140	expressed protein					1.48007	1.6143	1.53695	1.61369	0.00545288	0.00959478	0.019501	0.0279823	0.247875	4	0.67344
LOC_Os01g05430	OsRhmbd1 - Putative Rhomboid homologue, expressed					2.09092	2.00009	2.2785	2.19703	0.0187943	0.048493	0.019757	0.0248834	0.783806	15	0.835847
LOC_Os01g05460	expressed protein					1.08255	1.1106	0.93308	1.13628	0.0336276	0.059956	0.133934	0.0282785	0.210801	38	0.593344
LOC_Os01g05470	transcription factor X1, putative, expressed					2.66908	2.80119	2.67416	2.75658	0.000682629	0.00284152	0.00180091	0.0039973	0.861561	4	0.934561
LOC_Os01g05490	triosephosphate isomerase, cytosolic, putative, expressed	TRIOSEPHOSPHATE ISOMERASE	TPI	triosephosphate isomerase (cloned gene), triosephosphate isomerase, Triosephosphate isomerase, cytosolic, Triose-phosphate isomerase, triosephosphate isomerase-2, Cytosolic Triosephosphate lsomerase, Triose-phosphate isomerase	tpi*, tpi2	3.46883	3.43432	3.43673	3.38571	0.000367272	0.00168339	0.000755661	0.00286387	0.845221	13	0.901512
LOC_Os01g05510	expressed protein					2.42159	2.46826	2.37833	2.34575	0.00337041	0.00342661	0.000955062	0.00170782	0.194185	10	0.59991
LOC_Os01g05530	expressed protein					2.37986	2.50895	2.31736	2.38179	0.00301465	0.00104766	0.00359155	0.00127261	0.650796	4	0.700992
LOC_Os01g05560	expressed protein					2.49642	2.59382	2.41321	2.50045	0.00327975	0.00197235	0.00568113	0.00662533	0.688831	7	0.922272
LOC_Os01g05630	Core histone H2A/H2B/H3/H4 domain containing protein, putative, expressed	PYRICULARIA ORYZAE RESISTANCE T	PIT	Pyricularia oryzae resistance-t, Magnaporthe grisea resistance-t, Blast resistance 5	Pit, Pit(K59), Pit(Npb), Pi-t, PitNpb, PitK59	2.07381	2.11173	2.06836	2.14285	0.0040999	0.00609361	0.00991683	0.0170487	0.555602	45	0.696333
LOC_Os01g05640	receptor-like protein kinase 5 precursor, putative, expressed					1.34589	1.58408	1.23982	1.35905	0.0327372	0.010871	0.0567639	0.0374905	0.273446	4	0.691454
LOC_Os01g05650	metallothionein, putative, expressed	METALLOTHIONEIN 2A	MT2A	Metallothionein 2a, type 2 metallothionein a, metallothionein 6, metallothionein-like gene-2, MT-like gene-2	OsMT2a, met6, OsMT-2, rgMT-2, OsMT-I-2a, OsMT2-1	3.36579	3.34206	3.29551	3.32038	0.00382092	0.0030778	0.00685409	0.0022632	0.767826	18	0.902503
LOC_Os01g05660	expressed protein					2.82492	2.80008	2.86465	2.88161	0.00209084	0.00132807	0.000553175	0.000847742	0.449785	37	0.501984
LOC_Os01g05670	3-oxo-5-alpha-steroid 4-dehydrogenase, putative, expressed			eceriferum10, eceriferum 10	CER10, OsCER10	3.15127	3.09102	3.15468	3.13271	0.000573457	0.00105575	0.00027795	0.000382872	0.592236	14	0.815974
LOC_Os01g05680	geranylgeranyl transferase type-1 subunit beta, putative, expressed					1.95053	1.96556	1.95655	1.9665	0.00514835	0.00112509	0.00324239	0.00123309	-0.15044	8	0.295463
LOC_Os01g05694	expressed protein					1.84224	1.87091	1.93606	1.85576	0.0105555	0.0117094	0.0139047	0.0279231	0.475739	24	0.658242
LOC_Os01g05744	expressed protein					1.09684	1.2926	1.23327	1.41365	0.115976	0.0188195	0.0485954	0.0239217	0.280388	26	0.565006
LOC_Os01g05790	SLT1 protein, putative, expressed					2.95584	2.94027	2.87065	2.88487	0.00346437	0.00328702	0.00268602	0.00424643	0.888887	18	0.907634
LOC_Os01g05800	inner membrane protein, putative, expressed					3.57377	3.53362	3.51202	3.51037	0.00211198	0.00340919	0.00332946	0.0016375	0.884435	18	0.932222
LOC_Os01g05810	gamma-glutamyltranspeptidase 1 precursor, putative, expressed					2.81718	2.71777	2.76386	2.75292	0.001315	0.00272591	0.00482937	0.009824	0.760852	15	0.747203
LOC_Os01g05820	gamma-glutamyltranspeptidase 1 precursor, putative, expressed					1.00861	1.19047	1.15411	1.23917	0.100488	0.0402083	0.022782	0.0957394	0.357787	43	0.689229
LOC_Os01g05830	expressed protein					2.67528	2.65261	2.72862	2.67671	0.00344569	0.00243347	0.00486475	0.00843809	0.716477	44	0.745974
LOC_Os01g05840	oxidoreductase, short chain dehydrogenase/reductase family domain containing family, expressed					2.95367	2.89846	2.87396	2.86208	0.00311341	0.00884243	0.012112	0.0121222	0.936946	15	0.933207
LOC_Os01g05860	PPR repeat domain containing protein, putative, expressed					1.49841	1.6937	1.21906	1.41491	0.0287683	0.0103432	0.0728547	0.0329334	0.472282	7	0.760995
LOC_Os01g05870	receptor kinase, putative, expressed					1.9672	2.08933	2.27527	2.37781	0.0378752	0.0562152	0.0737602	0.0736814	0.888193	10	0.868273
LOC_Os01g05940	receptor kinase, putative, expressed	RECEPTOR-LIKE CYTOPLASMIC KINASE 24	RLCK24	Receptor-like Cytoplasmic Kinase 24	OsRLCK24	1.95147	2.09932	1.99362	2.07383	0.00488143	0.0040239	0.00515195	0.00592306	0.369156	12	0.743765
LOC_Os01g05960	receptor kinase, putative, expressed	RECEPTOR-LIKE CYTOPLASMIC KINASE 25	RLCK25	Receptor-like Cytoplasmic Kinase 25	OsRLCK25	2.06649	2.29194	1.91181	1.95676	0.00786266	0.00439863	0.0114559	0.0115342	0.491561	12	0.767672
LOC_Os01g05970	OsFBO1 - F-box and other domain containing protein, expressed			F-box protein 2	OsFbox002, OsFbox2	2.43158	2.4073	2.27766	2.23575	0.00503114	0.00239923	0.0124885	0.0219115	0.548932	45	0.680517
LOC_Os01g05980	receptor kinase, putative, expressed					1.93707	2.18907	2.00862	2.06273	0.00782235	0.00566654	0.00231699	0.00736776	0.53268	3	0.838396
LOC_Os01g06000	PPR repeat containing protein, expressed					1.59019	1.81191	1.59393	1.71363	0.0130022	0.0112011	0.00887203	0.00993239	0.418805	3	0.765313
LOC_Os01g06010	Core histone H2A/H2B/H3/H4 domain containing protein, putative, expressed					2.89295	2.87318	2.86159	2.85847	0.00162943	0.00108084	0.00371011	0.00369573	0.593823	45	0.605962
LOC_Os01g06020	aspartyl-tRNA synthetase, putative, expressed					2.63623	2.67378	2.65297	2.67966	0.000636103	0.00108819	0.000655488	0.00147305	0.553072	34	0.797331
LOC_Os01g06150	expressed protein					2.199	2.17977	2.31746	2.32309	0.00505301	0.011062	0.0121511	0.023474	0.719895	45	0.749301
LOC_Os01g06220	gibberellin receptor GID1L2, putative, expressed				Hsr203j	1.59578	1.31298	1.74866	1.63866	0.012822	0.0268929	0.0259434	0.0325491	0.449353	35	0.579393
LOC_Os01g06240	protein kinase, putative, expressed					0.987697	1.40721	1.60281	1.75476	0.140907	0.182289	0.0325275	0.104092	0.673319	33	0.827545
LOC_Os01g06270	expressed protein					2.90291	2.93309	2.95161	2.96923	0.000701097	0.000665381	0.000431774	0.000961811	0.699478	12	0.752677
LOC_Os01g06280	TKL_IRAK_CrRLK1L-1.4 - The CrRLK1L-1 subfamily has homology to the CrRLK1L homolog, expressed			Catharanthus roseus receptor-like kinase1-like kinase 4	OsCrRLK1L4	2.52014	2.64897	2.42428	2.4982	0.00834032	0.00176461	0.0030466	0.00676323	0.717593	7	0.805316
LOC_Os01g06290	splicing factor, arginine/serine-rich, putative, expressed					2.82711	2.82809	2.83351	2.85138	0.000879857	0.000664981	0.000642048	0.00103176	0.458977	24	0.653221
LOC_Os01g06454	heat shock protein DnaJ, putative, expressed			DnaJ domain protein C2	OsDjC2	1.98825	2.03009	1.87975	1.89661	0.0139839	0.00443547	0.00585792	0.012516	0.363132	37	0.600771
LOC_Os01g06460	uncharacterized Cys-rich domain containing protein, putative, expressed					2.58003	2.49407	2.51456	2.49029	0.00158113	0.00124543	0.00143801	0.00165727	0.403246	32	0.683579
LOC_Os01g06470	expressed protein	IMPORTIN ALPHA 2	IMPA2	importin alpha		2.42302	2.43701	2.39468	2.40653	0.00112161	0.00124696	0.00191017	0.00176933	0.317757	31	0.682625
LOC_Os01g06490	OsSCP1 - Putative Serine Carboxypeptidase homologue, expressed					2.67864	2.60885	2.68325	2.64607	0.00269959	0.00825489	0.00472838	0.0039028	0.775513	1	0.881624
LOC_Os01g06500	PHLOEM 2-LIKE A5, putative, expressed					2.87651	2.84816	2.76451	2.81879	0.00379216	0.00603324	0.00401703	0.00359188	0.633048	18	0.812287
LOC_Os01g06550	NF-X1-type zinc finger protein, putative, expressed					2.47933	2.61663	2.30447	2.36919	0.00594907	0.00366952	0.0154252	0.0167005	0.84649	31	0.905645
LOC_Os01g06560	transcription factor HBP-1b, putative, expressed			OsDOG1-like-2	OsDOG1L-2	1.86674	1.71987	1.84647	1.6109	0.0623764	0.0224473	0.0350306	0.0874716	0.557751	13	0.552909
LOC_Os01g06580	fasciclin domain containing protein, expressed	FASCICLIN-LIKE ARABINOGALACTAN PROTEIN 8	FLA8	fasciclin-like AGP 8, fasciclin-like arabinogalactan protein 8	OsFLA8	2.04043	1.72843	2.42352	2.30068	0.0493106	0.16061	0.0176981	0.0389314	0.750614	41	0.779815
LOC_Os01g06590	zinc finger, C3HC4 type domain containing protein, expressed					3.08195	3.01271	3.07228	3.03162	0.000740225	0.00108991	0.000570712	0.00123934	0.863748	5	0.877413
LOC_Os01g06600	glutaryl-CoA dehydrogenase, mitochondrial precursor, putative, expressed					2.59798	2.62788	2.68454	2.65111	0.00629204	0.00638117	0.00564711	0.00839234	0.68623	8	0.862905
LOC_Os01g06640	basic helix-loop-helix, putative, expressed			basic helix-loop-helix protein 035	OsbHLH035	1.85129	2.18302	1.84471	1.876	0.106938	0.0160987	0.0318627	0.0211185	0.610257	51	0.559997
LOC_Os01g06660	thiamine pyrophosphate enzyme, C-terminal TPP binding domain containing protein, expressed					2.52006	2.51717	2.42382	2.38745	0.0073513	0.00722175	0.00338766	0.00431649	0.777468	18	0.721719
LOC_Os01g06730	verticillium wilt disease resistance protein, putative, expressed					1.25038	1.15644	0.954572	0.930782	0.0405122	0.0433859	0.0380636	0.0564521	-0.119958	27	0.425256
LOC_Os01g06750	verticillium wilt disease resistance protein precursor, putative, expressed					1.5839	1.16909	1.50915	1.29193	0.0330216	0.0431248	0.00928848	0.0842671	0.228437	42	0.764755
LOC_Os01g06760	verticillium wilt disease resistance protein Ve2, putative, expressed					2.04012	1.77991	1.9248	1.81606	0.0258764	0.0321344	0.0322713	0.0959353	0.565074	27	0.730328
LOC_Os01g06790	disease resistance protein, putative, expressed					0.835481	1.60412	1.10282	0.994697	0.0668928	0.13333	0.170961	0.0642591	0.236865	47	0.75617
LOC_Os01g06820	hcr2-0B, putative, expressed					1.14869	1.25554	1.22958	1.26241	0.0277919	0.084651	0.0782891	0.0197356	0.263029	23	0.616351
LOC_Os01g06920	resistance protein SlVe1 precursor, putative, expressed					1.96783	2.10186	1.74912	1.87289	0.0267891	0.0149514	0.0148309	0.0214367	0.56461	37	0.725021
LOC_Os01g07070	transposon protein, putative, CACTA, En/Spm sub-class, expressed					2.48215	2.57471	2.47308	2.52841	0.00148071	0.000536838	0.00117769	0.00166657	0.497312	6	0.743465
LOC_Os01g07080	DEAD-box ATP-dependent RNA helicase, putative, expressed			brassinosteroid receptor kinase (BRI1)-interacting protein 115, BRI1-interacting protein 115, brassinosteroid receptor kinase-interacting protein 115, brassinosteroid receptor kinase (BRI1)-interacting protein 124, BRI1-interacting protein 124, brassinosteroid receptor kinase-interacting protein 124	BIP115, BIP124	2.51201	2.61775	2.41089	2.50522	0.00672941	0.00201122	0.00301853	0.00767529	0.593058	7	0.934711
LOC_Os01g07090	5-azacytidine resistance protein azr1, putative, expressed			protein phosphatase 2C01, protein phosphatase 2C 01, protein phosphatase 2C1, protein phosphatase 2C 1, protein phosphatase 1	OsPP2C01, PP2C01, OsPP2C1, PP2C1, OsPP1	3.27533	3.1461	3.22715	3.17148	0.000736569	0.006726	0.00511075	0.00343983	0.936291	1	0.956115	PBCP	light
LOC_Os01g07100	expressed protein					2.2939	2.20333	2.24395	2.2112	0.00121759	0.00172576	0.00231516	0.00136819	0.18563	14	0.62729
LOC_Os01g07110	BRCA2 repeat family protein, expressed				OsBRCA2	1.44557	1.41314	1.58271	1.40386	0.0410252	0.0216747	0.0303828	0.0396327	0.379873	15	0.697559
LOC_Os01g07120	AP2 domain containing protein, expressed	DEHYDRATION-RESPONSIVE ELEMENT-BINDING PROTEIN 2A	DREB2A	Dehydration-responsive element-binding protein 2A, Protein DREB2A, ethylene response factor 40, APETALA2/ethylene-responsive element binding protein 167	OsDREB2A, ERF40, OsERF#040, OsERF040, OsERF40, AP2/EREBP#167, AP2/EREBP167	2.59644	2.62533	2.58497	2.6091	0.000943123	0.00300914	0.00104765	0.00243463	0.296222	33	0.736766	OsDREB2A	drought
LOC_Os01g07140	kelch repeat-containing protein, putative, expressed					1.36073	1.49756	1.30367	1.43822	0.0147493	0.0301332	0.112572	0.0533118	0.377654	38	0.537124
LOC_Os01g07170	HORMA domain containing protein, putative, expressed				OsNAF0651	1.80859	2.08641	1.8251	1.925	0.00957684	0.00566444	0.00917333	0.0175803	0.555144	6	0.858011
LOC_Os01g07200	staphylococcal nuclease homologue, putative, expressed					2.73941	2.76556	2.73492	2.73935	0.00131891	0.000499782	0.000967911	0.00134592	0.414353	8	0.617366
LOC_Os01g07212	staphylococcal nuclease homologue, putative, expressed					1.20834	1.32705	1.15908	1.08985	0.0339789	0.0256804	0.0540587	0.0382527	0.144334	36	0.507384
LOC_Os01g07240	expressed protein					1.30271	1.66217	1.56973	1.86216	0.0593581	0.049119	0.0244073	0.0401933	0.6191	16	0.760311
LOC_Os01g07250	saposin-like type B, region 1 family protein, putative, expressed					2.88127	2.84362	2.85309	2.80336	0.00231877	0.0008858	0.000950472	0.00156015	0.658353	28	0.83084
LOC_Os01g07260	expressed protein					1.72002	1.93508	1.77795	1.78757	0.0199509	0.0356054	0.0273022	0.0091668	0.616444	34	0.781726
LOC_Os01g07280	disease resistance protein, putative, expressed					1.77862	2.02674	1.94719	1.99195	0.0100319	0.030746	0.0113354	0.0101369	0.670884	3	0.881498
LOC_Os01g07300	uncharacterized 50.6 kDa protein in the 5region of gyrA and gyrB, putative, expressed					1.73675	1.81195	1.81672	1.69612	0.0206534	0.0196506	0.0213124	0.0281239	0.483194	8	0.820157
LOC_Os01g07310	transporter-related, putative, expressed					3.0062	2.97218	3.05437	3.005	0.000854809	0.001257	0.000561977	0.000585888	0.829491	41	0.759915
LOC_Os01g07330	expressed protein					2.04127	2.0635	2.10933	2.098	0.00206966	0.00271357	0.00606082	0.0063896	0.113181	8	0.553653
LOC_Os01g07350	transposon protein, putative, unclassified, expressed					2.246	2.38302	2.41015	2.42467	0.00291868	0.00888892	0.00247881	0.00120336	0.449898	3	0.82836
LOC_Os01g07360	KIP1, putative, expressed					1.61198	1.81683	1.95284	1.92217	0.0209387	0.0189323	0.0107685	0.0111925	0.208256	16	0.697132
LOC_Os01g07370	KIP1, putative, expressed					3.41027	3.31474	3.45319	3.41592	0.000914171	0.00203574	0.00158756	0.00163902	0.883759	1	0.878986
LOC_Os01g07376	thioredoxin, putative, expressed	THIOREDOXIN H-TYPE 7	TRXH7	Thioredoxin H-type 7, H-type Thioredoxin 7, Thioredoxin 1	OsTRXh7, OsTrx1	2.20671	2.20275	2.28222	2.20411	0.00275898	0.00283207	0.0037621	0.00459672	0.0622586	23	0.606357
LOC_Os01g07382	expressed protein					2.42373	2.41832	2.43219	2.43152	0.00131823	0.00105055	0.00166617	0.000406034	0.127892	37	0.214232
LOC_Os01g07390	zinc finger, C3HC4 type family protein, expressed					2.24429	2.45233	2.18996	2.32681	0.0133455	0.00906067	0.0142419	0.00416132	0.837169	2	0.815813
LOC_Os01g07400	WD40-like domain containing protein, putative, expressed	AUTOPHAGY ASSOCIATED GENE 18B	ATG18B	autophagy 18b	OsATG18b, OsWD40-3	2.76938	2.72872	2.78396	2.76811	0.000761217	0.000626667	0.000566886	0.00126599	0.546015	17	0.788946
LOC_Os01g07410	growth regulator related protein, putative, expressed					2.44317	2.32849	2.57204	2.46726	0.00682439	0.00331337	0.000797431	0.00557122	0.717151	41	0.866385
LOC_Os01g07420	hydrolase, alpha/beta fold family protein, putative, expressed					1.79097	1.88721	2.09855	2.18699	0.0236616	0.00790969	0.0140274	0.047602	0.536043	43	0.836976
LOC_Os01g07500	alliin lyase precursor, putative, expressed	FISH BONE	FIB	fish bone	fib	2.29576	2.0076	2.19554	2.09356	0.00888142	0.0247917	0.00902388	0.00899461	0.737703	19	0.878541	TAA	temperature
LOC_Os01g07530	uncharacterized glycosyltransferase, putative, expressed			raffinose synthase		3.08389	2.95567	3.04217	2.98711	0.00185655	0.000331251	0.00233115	0.00184135	0.824186	17	0.879639
LOC_Os01g07540	G-patch domain containing protein, expressed					2.23338	2.25749	2.165	2.21227	0.00120476	0.00205504	0.00411505	0.00171432	0.00272911	26	0.314014
LOC_Os01g07560	receptor-like protein kinase 2 precursor, putative, expressed					1.5118	1.62967	1.93243	1.79327	0.0392189	0.0240998	0.0370841	0.0794803	0.563378	43	0.720667
LOC_Os01g07570	carboxyl-terminal proteinase, putative, expressed					1.03825	1.10136	1.07647	1.14413	0.0322954	0.0341167	0.0602334	0.0931261	-0.0389433	38	0.461564
LOC_Os01g07590	universal stress protein domain containing protein, putative, expressed					2.50992	2.4583	2.48496	2.4963	0.00530953	0.00979935	0.00426423	0.0122781	0.532555	37	0.474874
LOC_Os01g07600	expressed protein					1.76248	1.62382	0.983482	1.01651	0.0205346	0.0251275	0.0620684	0.0338332	0.24655	18	0.492297
LOC_Os01g07610	PPR repeat domain containing protein, putative, expressed					1.53298	1.76046	1.39404	1.5731	0.0198792	0.0145657	0.074317	0.0337553	0.517286	36	0.73774
LOC_Os01g07620	expressed protein			CLV3/ESR-related 101	OsCLE101	1.02622	1.16413	1.15823	0.979922	0.0673182	0.0228087	0.125165	0.0397858	-0.00632247	46	0.324405
LOC_Os01g07630	BRASSINOSTEROID INSENSITIVE 1-associated receptor kinase 1 precursor, putative, expressed			BRASSINOSTEROID INSENSITIVE 1-associated receptor kinase, SERK-like gene 5	OsSERL5	2.83106	2.81606	2.8565	2.84719	0.00835746	0.00148009	0.00237418	0.00739496	0.692291	25	0.897307	OsSERL5	light
LOC_Os01g07700	expressed protein					3.03104	2.94264	3.01104	2.95191	0.00190758	0.00499884	0.00629908	0.00471325	0.901927	1	0.879815
LOC_Os01g07720	dolichyl-P-Man Man-PP-dolichyl mannosyltransferase, putative, expressed					2.65455	2.64997	2.64075	2.63295	0.000872925	0.000673449	0.000408436	0.00116584	0.348284	15	0.578421
LOC_Os01g07730	phosphate/phosphoenolpyruvate translocator-related protein, putative, expressed	PHOSPHOENOLPYRUVATE/PHOSPHATE TRANSLOCATOR 3	PPT3		OsPPT3	2.79441	2.65567	2.7557	2.70934	0.00181687	0.00658278	0.00596946	0.00341534	0.816346	5	0.880689
LOC_Os01g07740	DEAD-box ATP-dependent RNA helicase 14, putative, expressed					2.51199	2.51522	2.50642	2.4789	0.00116793	0.000877736	0.00192827	0.00295352	0.385993	29	0.568797
LOC_Os01g07750	expressed protein					2.54909	2.52166	2.58891	2.54182	0.00300442	0.0016517	0.00341544	0.0044649	0.615896	28	0.857113
LOC_Os01g07770	peroxidase precursor, putative, expressed					2.51664	2.35881	2.51442	2.45233	0.00356498	0.01231	0.00223422	0.00298091	0.499595	5	0.848173
LOC_Os01g07780	embryo-specific 3, putative, expressed					2.6989	2.74546	2.80271	2.74838	0.005372	0.00309559	0.000781374	0.00233469	0.486103	29	0.610336
LOC_Os01g07800	thiol-disulphide oxidoreductase DCC, putative, expressed					3.03904	2.93853	2.90268	2.91958	0.00670812	0.0144701	0.0247625	0.0197349	0.935186	11	0.934678
LOC_Os01g07810	protein of unknown function domain containing protein, expressed			acetylation lowers binding affinity protein 1, Alba family protein 1	OsAlba1	2.72312	2.67085	2.71955	2.69145	0.00100461	0.000541949	0.00220436	0.000965155	0.651345	5	0.682361
LOC_Os01g07870	ABC transporter family protein, putative, expressed	MULTIDRUG RESISTANCE-ASSOCIATED PROTEIN 3	MRP3	ABC transporter superfamily ABCC subgroup member 3, multidrug resistance-associated protein 3	OsABCC3, OsMRP3	3.17102	3.09792	3.10023	3.06636	0.00134154	0.00129215	0.000628548	0.000913698	0.670651	19	0.764895
LOC_Os01g07880	transcription factor HY5, putative, expressed	b-ZIP TRANSCRIPTION FACTOR 1	BZIP1	b-ZIP transcription factor 01	OsbZIP01, OsbZIP1	1.93526	1.94284	1.91063	1.98583	0.0321404	0.00904432	0.0192046	0.0246002	0.665718	9	0.697885	HY5	drought/light
LOC_Os01g07890	expressed protein					2.40142	2.33316	2.5349	2.47279	0.0096007	0.00590918	0.00467249	0.00792703	0.607868	44	0.713604
LOC_Os01g07900	expressed protein					1.62337	1.65247	1.03222	1.24063	0.00737317	0.0112447	0.0204488	0.0364025	0.142739	38	0.524298
LOC_Os01g07910	NADH-cytochrome b5 reductase, putative, expressed					2.02129	2.16428	2.19856	2.24036	0.00579488	0.0079413	0.00412486	0.00227114	0.442427	12	0.717194
LOC_Os01g07920	prolyl 4-hydroxylase, putative, expressed					1.93829	2.0447	1.88034	1.94926	0.00221843	0.00223523	0.00953562	0.0114253	0.226123	4	0.637089
LOC_Os01g07940	AGC_PVPK_like_kin82y.3 - ACG kinases include homologs to PKA, PKG and PKC, expressed			OsPINOID-like	OsPIDlike	1.74507	1.97882	1.99468	1.91913	0.0129921	0.0117183	0.00357754	0.0077436	0.380426	46	0.832389
LOC_Os01g07950	OsGrx_S15.2 - glutaredoxin subgroup II, expressed	GLUTAREDOXIN 1	GRX1	glutaredoxin 1	OsGRX1	2.22465	2.22628	1.90739	1.93714	0.00174478	0.00447766	0.0115904	0.00932604	0.168317	31	0.416109
LOC_Os01g07960	acyl-protein thioesterase, putative, expressed					2.99722	2.88849	2.99674	2.95292	0.000852316	0.00120925	0.00151637	0.00143247	0.720633	14	0.92891
LOC_Os01g07970	expressed protein					2.05613	1.78586	2.16053	1.89017	0.0134905	0.0094012	0.0361585	0.0383402	0.636855	32	0.784945
LOC_Os01g08010	expressed protein					1.747	1.63705	1.39991	1.40855	0.00630195	0.010048	0.0301356	0.0487845	0.0883612	49	0.311205
LOC_Os01g08020	boron transporter protein, putative, expressed	EFFLUX BORON TRANSPORTER 2	BOR2	Boron transporter 2	OsBOR2, OsBOR3	2.91081	2.58689	2.70019	2.78612	0.0129216	0.0485008	0.043282	0.0155894	0.913535	11	0.920485
LOC_Os01g08090	flavonol-3-O-glycoside-7-O-glucosyltransferase 1, putative, expressed					1.53761	1.30883	1.88207	1.7237	0.093916	0.081725	0.0146686	0.0409239	0.454101	27	0.747371
LOC_Os01g08100	flavonol-3-O-glycoside-7-O-glucosyltransferase 1, putative, expressed					1.03837	1.26378	1.61757	1.49924	0.0792569	0.0657093	0.0397149	0.0760823	0.448199	10	0.740914
LOC_Os01g08110	flavonol-3-O-glycoside-7-O-glucosyltransferase 1, putative, expressed					1.86789	1.70145	2.13827	1.91504	0.00761048	0.00610636	0.00466038	0.00645374	0.34573	17	0.631604
LOC_Os01g08120	pentatricopeptide, putative, expressed					0.940357	1.27889	0.892115	0.971994	0.0438	0.0457177	0.0571425	0.0505229	0.197787	3	0.693569
LOC_Os01g08150	expressed protein					1.28634	0.644263	1.54092	1.12118	0.0515447	0.0341897	0.0495121	0.045209	0.52062	32	0.78303
LOC_Os01g08160	MYB family transcription factor, putative, expressed			MYB family transcription factor		2.1802	2.04268	2.18623	2.07221	0.00597857	0.00452426	0.00530854	0.00889732	0.36635	35	0.713294
LOC_Os01g08190	transcriptional corepressor LEUNIG, putative, expressed				OsWD40-4	1.47907	1.23111	1.31209	1.2071	0.0108249	0.0637388	0.0260528	0.0453549	0.390468	1	0.635839
LOC_Os01g08220	gibberellin 3-beta-dioxygenase 2-2, putative, expressed	DWARF 18	D18	hosetsu-waisei(d18-h), Akibare waisei(d18-AD), Waito-D(d18-dy),Kotaketamanishiki(d18-k),GA 3beta-hydroxylase2, GA 3beta-hydroxylase 2, GA 3-oxidase 2, Gibberellin(GA)-3 beta-hydroxylase-2	d18-h (d18-I, d18h), dwf15, d25, d18, d18-k, d18-AD, d18-dy, OsGA3ox2, ga3ox2, OsGA3OX2, GA3OX2, GA3ox-2	2.42191	2.22775	2.50917	2.43313	0.0128025	0.0331918	0.0282941	0.0285125	0.772953	15	0.886059
LOC_Os01g08260	pleiotropic drug resistance protein 4, putative, expressed	PLEIOTROPIC DRUG RESISTANCE 6	PDR6	sativa pleiotropic drug resistance 6, Pleiotropic drug resistance protein 6, ABC transporter superfamily ABCG subgroup member 31	OsPDR6, OsABCG31, OsABCG31NA1	1.59925	1.84477	1.76314	1.96715	0.0129351	0.039071	0.01469	0.0238314	0.66585	3	0.824004
LOC_Os01g08270	aminotransferase, classes I and II, domain containing protein, expressed					2.5817	2.81096	2.67914	2.73871	0.0106652	0.0188242	0.017266	0.00685679	0.813306	10	0.934031
LOC_Os01g08280	expressed protein					2.56618	2.61133	2.60024	2.57808	0.00238628	0.00222835	0.00202233	0.000707885	0.622425	16	0.649013
LOC_Os01g08290	transmembrane protein, putative, expressed					2.05857	2.12336	2.0865	2.08788	0.00470813	0.00676622	0.00443975	0.00602117	0.457655	33	0.698528
LOC_Os01g08310	serine/threonine protein phosphatase 2A 59 kDa regulatory subunit Bgamma isoform, putative, expressed					1.97386	1.88704	1.83935	1.73252	0.0103407	0.0341593	0.00699453	0.0158688	0.456996	30	0.731815
LOC_Os01g08320	OsIAA1 - Auxin-responsive Aux/IAA gene family member, expressed		IAA1	Aux/IAA protein 1	OsIAA1, OsIAA4	2.22142	2.13951	2.09681	2.17275	0.00877349	0.0189423	0.0125769	0.0102725	0.563754	24	0.497918
LOC_Os01g08340	zinc finger family protein, putative, expressed					2.28884	2.27918	2.34628	2.33679	0.00446176	0.00293196	0.00451753	0.00156387	0.501287	39	0.728682
LOC_Os01g08370	symbiosis-related disease resistance protein, putative, expressed					1.27355	1.60043	1.39711	1.46477	0.0514754	0.0392602	0.0664227	0.0466786	0.195695	2	0.795331
LOC_Os01g08400	syntaxin, putative, expressed					2.67733	2.68074	2.77313	2.77208	0.00117835	0.000547212	0.000649352	0.000614685	0.0450417	25	0.499851
LOC_Os01g08410	early fruit mRNA, putative, expressed			brassinosteroid receptor kinase (BRI1)-interacting protein 128, BRI1-interacting protein 128, brassinosteroid receptor kinase-interacting protein 128	BIP128	3.08664	3.01868	3.07998	3.03879	0.000481816	0.00108019	0.000708931	0.000914154	0.719266	13	0.906397
LOC_Os01g08420	EMB2410, putative, expressed			SUBSTANDARD STARCH GRAIN4	SSG4	2.81204	2.84121	2.81473	2.8467	0.000533645	0.000429941	0.000715549	0.000538786	0.535567	51	0.631254
LOC_Os01g08440	UDP-glucoronosyl and UDP-glucosyl transferase domain containing protein, expressed					2.75536	2.66636	2.5615	2.65987	0.0166079	0.015885	0.0397265	0.0265323	0.874227	18	0.917866
LOC_Os01g08450	ras-related protein, putative, expressed			small GTP-binding protein OsRab1C1, GTP-binding protein OsRab1	OsRab1C1	1.7837	1.70721	1.68091	1.73152	0.0188988	0.0078636	0.0418907	0.0158057	-0.085622	27	0.36893
LOC_Os01g08460	TMS membrane protein/tumour differentially expressed protein, putative, expressed					2.9138	2.6794	2.66684	2.59845	0.00786331	0.0504477	0.0593298	0.0338818	0.946326	11	0.959435
LOC_Os01g08464	expressed protein					1.51785	1.29264	1.34533	1.26187	0.0248696	0.0775627	0.0780182	0.0476477	0.55388	11	0.810468
LOC_Os01g08470	retrotransposon protein, putative, unclassified, expressed					1.22823	1.57319	1.84473	1.6879	0.0312762	0.0209199	0.0282168	0.044584	0.444724	46	0.677939
LOC_Os01g08510	MAR-binding filament-like protein 1, putative, expressed					3.12323	3.07745	3.22107	3.18706	0.0128749	0.00294714	0.00106112	0.00591268	0.747987	50	0.84318
LOC_Os01g08520	DUF581 domain containing protein, expressed					1.26166	1.56472	1.09415	1.51896	0.0496867	0.0174592	0.0837343	0.0296372	0.632237	4	0.709396
LOC_Os01g08540	DNA mismatch repair protein MSH6-2, putative, expressed					2.21896	2.27055	2.16561	2.24674	0.00289229	0.0119454	0.00799173	0.00527619	0.510076	38	0.788112
LOC_Os01g08550	aminoacyl-tRNA synthetase, putative, expressed					1.97623	2.16924	1.76814	2.0208	0.00676202	0.0148206	0.0107588	0.0228995	0.781039	4	0.888136
LOC_Os01g08560	DnaK family protein, putative, expressed					3.39638	3.39917	3.3877	3.40191	0.00356748	0.00308055	0.00683434	0.00757203	0.950256	9	0.895155	OsHsp110-1	temperature
LOC_Os01g08580	frigida, putative, expressed					2.70413	2.71896	2.67567	2.6786	0.00104125	0.000383085	0.000534944	0.00143384	0.380043	31	0.485175
LOC_Os01g08650	expressed protein					2.31579	2.24833	1.63852	1.60546	0.00324589	0.0196708	0.0327223	0.0491449	0.334406	27	0.591569
LOC_Os01g08660	aquaporin protein, putative, expressed	SMALL AND BASIC INTRINSIC PROTEIN 1;1	SIP1;1	Aquaporin SIP1-1, Small basic intrinsic protein 1-1	OsSIP1;1, SIP1-1	2.68112	2.61496	2.66673	2.64949	0.00132681	0.000859961	0.00111887	0.00164083	0.566102	17	0.89886
LOC_Os01g08670	expressed protein					1.39992	1.15689	1.30079	1.38404	0.0264137	0.0432463	0.0559975	0.0290481	0.300345	30	0.46449
LOC_Os01g08680	myb/SANT domain protein, putative, expressed					2.42026	2.45173	2.44521	2.45654	0.00145882	0.0028	0.00147795	0.000752012	0.188791	12	0.513363
LOC_Os01g08690	holocarboxylase synthetase, putative, expressed					1.98404	2.08921	1.98838	2.0385	0.00536065	0.00342819	0.0041089	0.00322932	0.476514	12	0.597106
LOC_Os01g08760	choline/ethanolamine kinase, putative, expressed					2.13182	2.15512	2.19011	2.19276	0.0036824	0.00347277	0.00451695	0.00737209	0.407289	9	0.582738
LOC_Os01g08770	WD domain, G-beta repeat domain containing protein, expressed				OsWD40-5	2.54438	2.67039	2.41075	2.54719	0.0114533	0.00622708	0.0105513	0.0173418	0.693103	7	0.950348
LOC_Os01g08780	endonuclease/exonuclease/phosphatase family domain containing protein, expressed					2.34052	2.17733	2.32157	2.19133	0.0582705	0.0441037	0.0104518	0.0166163	0.358149	35	0.736043
LOC_Os01g08810	cytochrome P450, putative, expressed					1.21023	1.3833	1.47615	1.40564	0.0317025	0.0250679	0.0958492	0.0359778	0.252482	8	0.60597
LOC_Os01g08814	expressed protein					2.47572	2.43453	2.40465	2.38797	0.00149721	0.00445384	0.00211514	0.00289108	0.567826	1	0.758886
LOC_Os01g08830	OsFBDUF1 - F-box and DUF domain containing protein, expressed			F-box protein 4	OsFbox004, OsFbox4, OsNAF0387	2.653	2.72152	2.62973	2.6464	0.00132363	0.00321187	0.00423723	0.00330225	0.722922	10	0.903598
LOC_Os01g08850	expressed protein					2.14964	2.26169	1.9681	2.13512	0.0150354	0.00653607	0.00921567	0.0174308	0.700432	7	0.877984
LOC_Os01g08860	hsp20/alpha crystallin family protein, putative, expressed	18.0 KDA CLASS II HEAT SHOCK PROTEIN	HSP18.0-CII	18.0 kDa class II heat shock protein	OsHSP18.0-CII, Oshsp18.0-CII, OsHSP18.0	2.39946	2.69628	2.33973	2.44001	0.0726015	0.0955901	0.0942529	0.112914	0.881121	9	0.90538	OsHsp18.0-CII	temperature
LOC_Os01g08880	expressed protein					1.41127	1.50613	1.27009	1.381	0.0201952	0.0549836	0.0740484	0.0697086	0.166123	23	0.516119
LOC_Os01g08890	expressed protein					2.90969	2.77568	2.80963	2.78291	0.00372694	0.0240383	0.00359593	0.00386793	0.324866	49	0.805976
LOC_Os01g08930	DEAD-box ATP-dependent RNA helicase, putative, expressed					2.74441	2.89527	2.70929	2.85928	0.00625294	0.00687574	0.00466164	0.0065098	0.829662	4	0.942912
LOC_Os01g08950	expressed protein					1.21231	1.24712	1.2488	1.21821	0.0431762	0.0186821	0.082091	0.0445405	0.177793	27	0.347261
LOC_Os01g08960	phosducin-like protein 3, putative, expressed					2.28839	2.33198	2.29274	2.27419	0.00129628	0.00133939	0.00287912	0.00385168	0.0169946	36	0.393922
LOC_Os01g09000	glutaminyl-tRNA synthetase, putative, expressed					3.18981	3.21276	3.16126	3.21337	0.000649181	0.000935434	0.00125894	0.00256672	0.809424	4	0.746075
LOC_Os01g09010	transferase family protein, putative, expressed			acyltransferase 9	OsAT9, OsAt9	2.56143	2.44315	2.60652	2.54767	0.00337828	0.00468134	0.00315594	0.00786177	0.672861	17	0.817235
LOC_Os01g09020	WD domain, G-beta repeat domain containing protein, expressed				OsWD40-6	2.45205	2.506	2.36746	2.39329	0.00159923	0.00388068	0.0082516	0.00727462	0.44901	10	0.805767
LOC_Os01g09030	2-aminoethanethiol dioxygenase, putative, expressed					2.08458	2.00232	2.02025	1.95119	0.00573938	0.00563738	0.0145758	0.00462115	0.167205	30	0.477551
LOC_Os01g09120	Twin LOV 1, putative, expressed					2.81187	2.75289	2.70724	2.64031	0.00171861	0.00473124	0.00556957	0.00771059	0.806527	44	0.820347
LOC_Os01g09200	AGC_AGC_other_NDRh_TRCd.1 - ACG kinases include homologs to PKA, PKG and PKC, expressed					2.78274	2.7902	2.84463	2.84437	0.000451586	0.000484526	0.000379365	0.000499252	-0.069858	21	0.327106
LOC_Os01g09220	transposon protein, putative, CACTA, En/Spm sub-class, expressed					2.33252	2.12297	2.10106	2.05445	0.0480506	0.0283966	0.0352439	0.0459421	0.646388	35	0.671227
LOC_Os01g09230	expressed protein					1.23328	1.26639	1.30136	1.3564	0.030574	0.00717415	0.0455115	0.046863	0.233305	20	0.287558
LOC_Os01g09252	WD domain, G-beta repeat domain containing protein, expressed				OsWD40-7	2.81826	2.79107	2.76815	2.75317	0.000445291	0.000473963	0.000429143	0.000313609	0.218409	30	0.689878
LOC_Os01g09280	myb-related transcription activator, putative, expressed					2.53171	2.65052	2.49359	2.56308	0.0139256	0.00281268	0.00729727	0.00382033	0.567617	37	0.801974
LOC_Os01g09300	oxidoreductase, putative, expressed					2.92338	2.97686	2.94871	2.93606	0.00209081	0.000790663	0.00255861	0.00399145	0.804744	9	0.666111
LOC_Os01g09305	EMB1895, putative, expressed					2.566	2.50063	2.57894	2.55095	0.00463346	0.00155662	0.0006688	0.00160202	0.413627	14	0.742374
LOC_Os01g09310	EMB1895, putative, expressed					2.79982	2.75274	2.82757	2.80601	0.00359381	0.00173409	0.000473725	0.00117409	0.732913	28	0.720173
LOC_Os01g09370	ankyrin repeat domain-containing protein 28, putative, expressed					1.76891	1.93504	1.02954	1.0923	0.0238812	0.0822862	0.0322559	0.0414329	0.352699	33	0.614622
LOC_Os01g09384	ankyrin repeat domain containing protein, putative, expressed					1.57273	1.39291	1.00106	0.919647	0.0334827	0.0329449	0.0126906	0.0505886	0.181698	49	0.517913
LOC_Os01g09410	expressed protein					1.88797	1.79961	1.11139	1.10195	0.00586171	0.0210042	0.0191756	0.0183135	-0.0376083	49	0.501057
LOC_Os01g09420	expressed protein					2.38136	2.31575	1.99495	1.98351	0.00121508	0.0133878	0.0225776	0.0212898	0.167301	27	0.643856
LOC_Os01g09430	expressed protein					2.93229	2.92883	2.82925	2.75039	0.00398562	0.00174898	0.00344364	0.00461522	0.699631	44	0.536059
LOC_Os01g09450	OsIAA2 - Auxin-responsive Aux/IAA gene family member, expressed		IAA2	Aux/IAA protein 2	OsIAA2	2.44018	2.32996	2.35401	2.23172	0.00926077	0.0030918	0.00350048	0.00683128	0.465995	28	0.718433
LOC_Os01g09510	60S acidic ribosomal protein, putative, expressed			Ribosomal protein L12eI		2.90591	2.97626	2.88966	2.92859	0.00498344	0.00296492	0.00314417	0.00825222	0.544521	20	0.931922
LOC_Os01g09540	HAD superfamily phosphatase, putative, expressed					2.72748	2.97587	2.75763	2.72883	0.0311346	0.0169315	0.0300806	0.0193046	0.849542	8	0.855577
LOC_Os01g09550	no apical meristem protein, putative, expressed			NAC domain-containing protein 003, NAC domain-containing protein 3, NAC domain-containing protein 16	ONAC003, ONAC3, ONAC016, ONAC16	2.74838	2.76733	2.87044	2.92393	0.00224335	0.00109851	0.0010769	0.00636206	0.62187	43	0.726203
LOC_Os01g09570	6-phosphofructokinase, putative, expressed					3.14509	3.21076	3.14202	3.1476	0.000698488	0.00156878	0.00197461	0.00233651	0.849654	9	0.823483
LOC_Os01g09590	myb-like DNA-binding domain containing protein, putative, expressed				R2R3-MYB	1.54897	1.56103	1.53125	1.52287	0.0158045	0.0129885	0.0430207	0.0754775	0.411235	21	0.566744
LOC_Os01g09620	zinc finger/CCCH transcription factor, putative, expressed	DELAY OF THE ONSET OF SENESCENCE	DOS	delay of the onset of senescence, Zinc finger CCCH domain-containing protein 2, Protein DELAY OF THE ONSET OF SENESCENCE, Tandem zinc finger protein 2	OsDOS, OsC3H2, C3H2, OsTZF2, OsCCCH-Zn-4	2.57914	2.86838	2.55402	2.73652	0.0254206	0.0370611	0.0265008	0.0089673	0.815851	26	0.884709
LOC_Os01g09640	Myb transcription factor, putative, expressed					2.67789	2.86968	2.74544	2.82143	0.00630384	0.0254821	0.00284441	0.00528187	0.555307	33	0.712641
LOC_Os01g09665	expressed protein					2.55937	2.5596	2.35237	2.44289	0.00366243	0.00697128	0.00961689	0.0050523	0.46152	20	0.552412
LOC_Os01g09670	pollen-specific protein SF21, putative, expressed			pollen-specific protein SF21	SF21	2.1748	2.13303	2.34173	2.35507	0.015072	0.00777232	0.00718828	0.0198858	0.684049	25	0.803936
LOC_Os01g09740	F-box/LRR-repeat protein, putative, expressed					2.0052	2.01722	1.96995	1.98565	0.00316439	0.0022142	0.00327019	0.00437699	-0.203126	8	0.317435
LOC_Os01g09750	RNA methyltransferase protein, putative, expressed					2.38598	2.60294	2.32578	2.48473	0.00990972	0.00549267	0.00644634	0.017344	0.82794	4	0.936412
LOC_Os01g09760	DIRP family protein, putative, expressed	ALWAYS EARLYLIKE 1	ALYL1	ALWAYS EARLYLIKE1	OsALYL1	2.524	2.62363	2.55372	2.61114	0.00285725	0.00819792	0.00357055	0.00470902	0.786592	3	0.84753
LOC_Os01g09770	expressed protein					2.92632	2.92809	2.98179	2.97875	0.00114776	0.000623458	0.00189935	0.00459954	0.625785	45	0.797403
LOC_Os01g09790	IQ calmodulin-binding motif domain containing protein, expressed					1.55242	1.44416	1.47549	1.38008	0.0196206	0.00711254	0.115016	0.0286689	0.319702	42	0.394917
LOC_Os01g09800	BTBA1 - Bric-a-Brac,Tramtrack, Broad Complex BTB domain with Ankyrin repeat region, expressed	NPR1 HOMOLOG 1	NH1	NPR1-like 1, NPR1 homologue 1, nonexpresser of PR genes 1, Arabidopsis NPR1 homolog 1, non-expressor of pathogenesis-related gene 1, Arabidopsis NPR1 homologue 1, pathogenesis-related gene 2, nonexpressor of PR genes 1	OsNH1, OsNPR1, OsNPR1/NH1, OsPR2, PR2	2.21089	2.09171	2.23287	2.13569	0.013844	0.0539806	0.027535	0.0331698	0.770544	27	0.918702
LOC_Os01g09830	OsGrx_A2 - glutaredoxin subgroup III, expressed	GLUTAREDOXIN 2	GRX2	glutaredoxin 2	OsGRX2	1.788	1.78353	1.65725	1.80259	0.0758195	0.0268769	0.0456689	0.0769262	0.736761	37	0.778789
LOC_Os01g09850	ZOS1-04 - C2H2 zinc finger protein, expressed			indeterminate domain 2	OsIDD2	2.21161	2.18858	2.16606	2.16972	0.00170065	0.00188711	0.00483985	0.00225714	0.24345	30	0.248288
LOC_Os01g09860	retrotransposon protein, putative, unclassified, expressed					2.02874	2.03431	2.18725	2.13779	0.0200324	0.00648711	0.00630942	0.00664618	0.544995	29	0.782569
LOC_Os01g09880	harpin-induced protein 1 domain containing protein, expressed					2.58041	2.33021	2.89218	2.82108	0.031906	0.0267307	0.00335692	0.0168851	0.744209	17	0.886608
LOC_Os01g09890	translation initiation factor SUI1, putative, expressed					2.87863	2.89417	2.82865	2.83099	0.00135864	0.00172772	0.000412003	0.000386081	0.432559	51	0.573745
LOC_Os01g09990	helix-loop-helix DNA-binding domain containing protein, expressed			basic helix-loop-helix protein 025	OsbHLH025	1.0786	1.01907	1.15595	1.32104	0.127932	0.0826538	0.108057	0.0390415	0.203982	38	0.548034
LOC_Os01g10010	prenylated rab acceptor, putative, expressed					1.77697	1.72363	1.75535	1.72266	0.00580122	0.0069179	0.00597752	0.00393056	-0.0518439	14	0.317911
LOC_Os01g10020	ectonucleotide pyrophosphatase/phosphodiesterase family member 1, putative, expressed					2.60437	2.58454	2.60877	2.60352	0.00260186	0.00090868	0.00216521	0.00208788	0.702144	15	0.764497
LOC_Os01g10030	expressed protein					2.08352	2.16594	2.09041	2.17851	0.00989841	0.0033966	0.00336987	0.00525123	0.322278	12	0.686954
LOC_Os01g10040	cytochrome P450, putative, expressed	DWARF EBISU	D2	ebisu dwarf, dwarf-2, cytochrome P450, CYP90D2, Ebisu dwarf/Dwarf2, Dwarf2	D2b, CYP90D2/D2, d2, dwf2, CYP90D2, D2/CYP90D2, OsD2	2.41526	2.41898	2.36866	2.43959	0.00253112	0.00677563	0.00327522	0.00700774	0.614017	38	0.624103	OsD2	light
LOC_Os01g10050	DEAD-box ATP-dependent RNA helicase, putative, expressed					2.75953	2.78096	2.75345	2.77346	0.000242943	0.000293324	0.000998088	0.000296929	0.319686	10	0.808756
LOC_Os01g10080	expressed protein					2.44179	2.36292	2.36826	2.24022	0.00369153	0.0030832	0.00882045	0.0185448	0.723595	44	0.883073
LOC_Os01g10100	expressed protein					2.67501	2.51216	2.59969	2.53326	0.00116185	0.00609785	0.00438109	0.00336161	0.856567	5	0.956584
LOC_Os01g10130	RNA-dependent RNA polymerase, putative, expressed	RNA-DEPENDENT RNA POLYMERASE 3	RDR3	RNA-dependent RNA polymerase 3, Probable RNA-dependent RNA polymerase 3	OsRDR3, OsRDR3a	1.51469	1.46605	1.35746	1.39573	0.0194282	0.00611104	0.0396213	0.0209726	0.0849296	42	0.262606
LOC_Os01g10140	RNA-dependent RNA polymerase, putative, expressed	RNA-DEPENDENT RNA POLYMERASE 4	RDR4	RNA-dependent RNA polymerase 4, Probable RNA-dependent RNA polymerase 4	OsRDR4, OsRDR3b	1.66979	1.84726	1.74329	1.7906	0.0141868	0.0134337	0.0162841	0.00816108	0.464925	3	0.579302
LOC_Os01g10210	lachrymatory factor synthase, putative, expressed					2.77622	2.73519	2.79814	2.60389	0.0138802	0.00516447	0.00819405	0.0193244	0.785043	28	0.820238
LOC_Os01g10250	hydrolase, alpha/beta fold family domain containing protein, expressed					2.73557	2.77565	2.73818	2.67997	0.00118516	0.00293883	0.00135973	0.00103282	0.579088	52	0.627629
LOC_Os01g10280	phosphoribosylaminoimidazole carboxylase, chloroplast precursor, putative, expressed					2.67571	2.73802	2.55153	2.6486	0.00603075	0.00137835	0.00419052	0.00770199	0.760362	37	0.917924
LOC_Os01g10290	autophagy-related protein 3, putative, expressed	AUTOPHAGY ASSOCIATED GENE 3A	ATG3A	autophagy 3a	OsATG3a	2.60459	2.57638	2.62073	2.59938	0.000661974	0.000681902	0.000804341	0.00109491	0.286815	17	0.590687
LOC_Os01g10300	expressed protein					2.30704	2.33396	2.28522	2.30097	0.00228724	0.00108211	0.00116354	0.00172101	0.0603314	16	0.334392
LOC_Os01g10320	class III HD-Zip protein 8, putative, expressed	HOMEODOMAIN CONTAINING PROTEIN 5, HOMEOBOX GENE 29	OSHB5, HOX29	Homeobox-leucine zipper protein HOX29, Homeodomain transcription factor HOX29, HD-ZIP protein HOX29, rice homeobox gene 29	OsHox29, HOX29, Oshox29	2.32319	2.56086	2.2721	2.40101	0.0104152	0.0376234	0.0126969	0.0287082	0.790605	9	0.854691
LOC_Os01g10340	expressed protein					2.07945	2.16347	2.16972	2.15176	0.00673749	0.00519612	0.0039978	0.0151175	0.491633	22	0.681853
LOC_Os01g10350	MPPN domain containing protein, expressed					1.99619	2.15335	1.92858	2.01721	0.00431552	0.00516918	0.00428978	0.00905417	0.596167	4	0.852773
LOC_Os01g10400	expressed protein	METALLOTHIONEIN I-3A	MTI3A	Metallothionein 3a, type 3 metallothionein a, metallothionein 2	OsMT3a, OsMT-I-3a, MTe, met2, OsMT3, OsMTI-3a	3.82794	3.82529	3.79337	3.77199	0.00172429	0.00365826	0.00376991	0.00159865	0.530997	11	0.790616
LOC_Os01g10430	protein kinase family protein, putative, expressed			CDK-LIKE 4, cyclin-dependent kinase-like 4	Orysa;CKL4	2.78907	2.79769	2.78776	2.81412	0.000478418	0.000321738	0.000731509	0.000530019	0.335351	31	0.473755
LOC_Os01g10440	xylosyltransferase, putative, expressed					1.31045	1.48079	1.34113	1.40195	0.0427768	0.0697842	0.096649	0.101674	0.428447	10	0.817267
LOC_Os01g10450	protein kinase domain containing protein, expressed					3.21245	3.20147	3.16061	3.13944	0.000966619	0.00563112	0.00307757	0.00370646	0.801709	11	0.64202
LOC_Os01g10504	OsMADS3 - MADS-box family gene with MIKCc type-box, expressed	RICE AGAMOUS	RAG	MADS box gene3, MADS-box transcription factor 3, Protein AGAMOUS-like	MADS3, OsMADS3, OsMADS3(t), RMADS222, RAG1	1.55194	1.75687	1.79575	1.75841	0.0131161	0.00869025	0.0102172	0.0176862	0.284792	46	0.686208
LOC_Os01g10530	expressed protein	NOD26 LIKE INTRINSIC PROTEIN 1;5	NIP1;5	Aquaporin NIP1-5, NOD26-like intrinsic protein 1-5	OsNIP1;5, NIP1-5	2.55892	2.62687	2.61066	2.6794	0.00290207	0.000873264	0.00172215	0.00125739	0.677464	26	0.829313
LOC_Os01g10580	B-box zinc finger family protein, putative, expressed			B-box-containing protein 1, DOUBLE B-BOX zinc finger gene 3c, DOUBLE B-BOX 3c	OsBBX1, OsDBB3c	2.17221	2.3043	1.89104	2.18081	0.0151581	0.00859436	0.0367302	0.026963	0.73695	31	0.691639
LOC_Os01g10610	BES1/BZR1 homolog protein, putative, expressed					2.68249	2.66673	2.71934	2.6778	0.00180826	0.00142058	0.00107379	0.00148002	0.364392	35	0.515691	OsBZR2	temperature/light
LOC_Os01g10630	expressed protein					1.93425	2.07824	1.74947	1.91184	0.00640318	0.00254138	0.0170044	0.0136865	0.379222	7	0.792027
LOC_Os01g10640	expressed protein					1.58001	1.624	1.87727	1.90299	0.0647128	0.0171282	0.076695	0.0418045	0.657029	24	0.756227
LOC_Os01g10680	GIL1, putative, expressed					2.5646	2.56877	2.46553	2.53332	0.0026205	0.00583063	0.00648273	0.00933225	0.736427	9	0.762793
LOC_Os01g10690	POLD3 - Putative DNA polymerase delta complex subunit, expressed					2.23001	2.38544	2.30054	2.37341	0.0022966	0.00593842	0.00271905	0.00445082	0.616998	3	0.820777
LOC_Os01g10790	WD domain, G-beta repeat domain containing protein, expressed				OsWD40-8	2.35005	2.42495	2.25937	2.26777	0.00128094	0.00163269	0.00686129	0.00692992	0.565491	31	0.752429
LOC_Os01g10800	pentatricopeptide, putative, expressed					2.47822	2.59037	2.59077	2.53551	0.026791	0.0114582	0.014461	0.0300488	0.807541	8	0.752007
LOC_Os01g10810	rho termination factor, N-terminal domain containing protein, expressed					2.48684	2.22225	2.5049	2.29892	0.0157647	0.0257684	0.00452029	0.0320856	0.918789	14	0.917834
LOC_Os01g10820	ribosomal protein L5, putative, expressed			Ribosomal protein L11e		2.21574	2.2623	2.05003	2.14983	0.0120675	0.00617351	0.0122304	0.0155589	0.442517	20	0.794606
LOC_Os01g10830	carnitine racemase like protein, putative, expressed					1.13052	1.1527	0.999705	0.922812	0.0425021	0.00773946	0.0695395	0.068001	0.0479384	21	0.448935
LOC_Os01g10840	CGMC_GSK.2 - CGMC includes CDA, MAPK, GSK3, and CLKC kinases, expressed			GSK3/SHAGGY-Like Kinase 1, glycogen synthase kinase3-like gene 1	GSK1, Os GSK1, OsGSK1	2.76984	2.77902	2.77058	2.77204	0.000693912	0.000372322	0.000311755	0.000612309	0.250305	22	0.483055	OsGSK1	light
LOC_Os01g10860	expressed protein					1.43832	1.69257	1.37715	1.53673	0.01319	0.0123464	0.0226197	0.0230085	0.487914	4	0.790088
LOC_Os01g10890	CAMK_KIN1/SNF1/Nim1_like.8 - CAMK includes calcium/calmodulin depedent protein kinases, expressed	CALCINEURIN B-LIKE PROTEIN-INTERACTING PROTEIN KINASE 5	CIPK05	CBL-interacting protein kinase 5	OsCIPK05, CIPK5, OsCIPK5	3.25792	3.25161	3.25385	3.18525	0.00121574	0.0034832	0.00379633	0.00371509	0.806796	48	0.68755
LOC_Os01g10900	MRH1, putative, expressed					1.29864	1.49442	1.42972	1.46462	0.0183478	0.0569746	0.0294045	0.0106999	0.357784	16	0.595646
LOC_Os01g10930	peptide-N4-asparagine amidase A, putative, expressed					2.19798	2.17945	2.39083	2.42715	0.0245388	0.00587109	0.00359687	0.0283314	0.670022	25	0.899532
LOC_Os01g10950	peptide-N4-asparagine amidase A, putative, expressed					2.74431	2.47053	2.7922	2.64398	0.00614314	0.0217679	0.00396317	0.0151836	0.912951	14	0.94571
LOC_Os01g10990	integral membrane protein DUF6 containing protein, expressed					1.05492	1.02076	0.999002	1.01115	0.0482035	0.0647179	0.110713	0.0779745	0.148369	24	0.556405
LOC_Os01g11054	phosphoenolpyruvate carboxylase, putative, expressed			PEP carboxylase 2, Phosphoenolpyruvate carboxylase 2, phosphoenolpyruvate carboxylase 4, PEPCase 4	PEPC-2, Osppc4	3.18794	3.18628	3.14635	3.12836	0.00117669	0.00441982	0.00260789	0.00380296	0.814428	48	0.810096
LOC_Os01g11070	Alg9-like mannosyltransferase protein, putative, expressed					2.71167	2.7263	2.65522	2.67028	0.000618263	0.000436379	0.000930582	0.00153035	0.326696	37	0.652814
LOC_Os01g11110	14-3-3 protein, putative, expressed	G-BOX FACTOR 14-3-3G PROTEIN	GF14G	G-box factor 14-3-3g protein	GF14g, OsGF14g	2.29043	2.38303	2.26048	2.34771	0.0019736	0.00427855	0.00470136	0.0080258	0.640296	33	0.825526	OsGF14g	light
LOC_Os01g11120	CID11, putative, expressed					2.63936	2.60707	2.62647	2.62813	0.000815197	0.00109856	0.00114512	0.00127888	0.531195	15	0.688625
LOC_Os01g11160	amino acid permease family protein, putative, expressed			cationic amino acid transporter 1	OsCAT1	2.38369	2.17984	2.49039	2.35917	0.00478656	0.0150203	0.00500131	0.00497778	0.623639	19	0.797992
LOC_Os01g11230	SOUL heme-binding protein, putative, expressed					3.19206	3.13262	3.15342	3.11464	0.00370459	0.00283698	0.00568902	0.00418264	0.867577	11	0.844557
LOC_Os01g11240	DUF538 domain containing protein, putative, expressed					2.9147	2.94303	2.9177	2.93385	0.00161972	0.00130534	0.00251658	0.00237464	0.681688	8	0.7733
LOC_Os01g11250	potassium channel KAT1, putative, expressed	SHAKER POTASSIUM CHANNEL 2	KAT2	shaker potassium channel OsKAT2	OsKAT2	2.56798	2.66524	2.53423	2.59025	0.00179146	0.00434563	0.00539397	0.00346355	0.791709	10	0.807826
LOC_Os01g11260	phospho-N-acetylmuramoyl-pentapeptide-transferase, putative, expressed					1.9676	1.96304	1.82188	1.93833	0.00463988	0.00325929	0.0128386	0.0134235	0.156476	45	0.550181
LOC_Os01g11340	cytochrome P450, putative, expressed					1.74232	1.65345	1.94269	1.9206	0.0197016	0.00937842	0.00412235	0.0193954	0.429898	28	0.727092
LOC_Os01g11350	bZIP transcription factor domain containing protein, expressed	b-ZIP TRANSCRIPTION FACTOR 2	BZIP2	b-ZIP transcription factor 02	OsbZIP02, OsbZIP2	1.60226	1.36372	1.54712	1.62	0.0271674	0.0593254	0.0163868	0.00984265	0.124518	19	0.576744
LOC_Os01g11370	ATP-dependent RNA helicase, putative, expressed					2.6207	2.75347	2.52924	2.61527	0.00263852	0.00504981	0.00588576	0.00816419	0.881928	4	0.937442
LOC_Os01g11414	sodium/calcium exchanger protein, putative, expressed			EF-hand containing H+/cation exchanger 1, EF-hand containing CAX 1	OsEFCAX1	2.35778	2.39616	2.19599	2.28287	0.00229541	0.00107385	0.00243144	0.00507061	0.220085	51	0.582329
LOC_Os01g11520	RING-H2 finger protein, putative, expressed			RING finger protein OsRFPH2-8, RING-H2 protein 8	OsRFPH2-8	1.3923	1.32425	1.25411	1.12789	0.0273143	0.0366464	0.151451	0.156325	0.324998	24	0.793172
LOC_Os01g11550	TCP family transcription factor, putative, expressed			PROLIFERATING CELL FACTOR 5	OsPCF5, PCF5	1.65324	1.94464	1.79331	1.88303	0.0506607	0.0187282	0.0159527	0.0301135	0.672059	22	0.856445	OsPCF5, PCF5	light
LOC_Os01g11570	GDSL-like lipase/acylhydrolase, putative, expressed	GDSL ESTERASE/LIPASE PROTEIN 1	GELP1	GDSL esterase/lipase protein 1, esterase 1	OsGELP1, OsEST1	1.32884	1.75576	1.44354	1.61096	0.0286684	0.0446302	0.0795543	0.0706976	0.617966	2	0.752157
LOC_Os01g11590	uncharacterized protein HI0077, putative, expressed					2.91969	2.77863	2.90311	2.8775	0.00149862	0.00241534	0.00404346	0.0028907	0.721944	1	0.814852
LOC_Os01g11620	GDSL-like lipase/acylhydrolase, putative, expressed	GDSL ESTERASE/LIPASE PROTEIN 2	GELP2	GDSL esterase/lipase protein 2	OsGELP2, OsGELP2a, OsGELP2b	2.54034	2.58922	2.73378	2.65577	0.0239705	0.00249312	0.00606751	0.0172979	0.723141	25	0.871353
LOC_Os01g11650	GDSL-like lipase/acylhydrolase, putative, expressed	GDSL ESTERASE/LIPASE PROTEIN 3	GELP3	GDSL esterase/lipase protein 3	OsGELP3, OsGELP3a, OsGELP3b	3.18743	3.13403	3.18814	3.17322	0.000555142	0.000964137	0.00127277	0.00266325	0.81078	17	0.691314
LOC_Os01g11670	OsSCP2 - Putative Serine Carboxypeptidase homologue, expressed					1.50739	1.40132	1.52509	1.48733	0.0155846	0.0535637	0.015984	0.0159195	0.0791639	40	0.566562
LOC_Os01g11810	powdery mildew resistant protein 5, putative, expressed					2.01588	1.83919	2.19864	2.01974	0.0609192	0.0296026	0.0182148	0.0355798	0.812013	28	0.882336
LOC_Os01g11860	DJ-1 family protein, putative, expressed					1.22085	1.03231	1.21119	1.14646	0.13816	0.179596	0.195921	0.0691006	0.423124	27	0.759538
LOC_Os01g11880	DJ-1 family protein, putative, expressed					2.49764	2.5279	2.57667	2.54852	0.00563943	0.00458178	0.00335534	0.00265346	0.793747	8	0.797306
LOC_Os01g11910	basic helix-loop-helix, putative, expressed			basic helix-loop-helix protein 037	OsbHLH037	2.08349	2.14821	2.26761	2.23432	0.0139437	0.0248163	0.016247	0.0341568	0.545866	23	0.883522
LOC_Os01g11920	retrotransposon protein, putative, unclassified, expressed					1.4346	1.57398	1.4963	1.60552	0.0541866	0.0182145	0.0274989	0.018782	0.283321	9	0.763991
LOC_Os01g11946	ABC transporter, ATP-binding protein, putative, expressed	ABC TRANSPORTER D FAMILY MEMBER 1	ABCD1	ABC transporter superfamily ABCD subgroup member 1	OsABCD1, OsABCD1NA1, OsABCD1NA2	3.28008	3.22569	3.22481	3.20411	0.000539393	0.00282995	0.00306628	0.00147341	0.895742	1	0.961549
LOC_Os01g11952	histone-lysine N-methyltransferase ATX5, putative, expressed			SET protein 1	OsSET1, SDG721	2.83873	2.81185	2.87224	2.8684	0.00109262	0.000486088	0.000638437	0.00076161	0.54761	28	0.694459
LOC_Os01g11960	histone-lysine N-methyltransferase ATX5, putative, expressed					2.6489	2.6794	2.60454	2.58418	0.00350832	0.0095997	0.0053824	0.00576496	0.833689	9	0.81389
LOC_Os01g11970	expressed protein					1.04789	1.18385	0.947351	1.07468	0.0375949	0.0572676	0.0747097	0.0439494	0.0423983	7	0.613886
LOC_Os01g11980	SFT2, putative, expressed					1.63549	1.69968	1.7182	1.70917	0.00836283	0.00595409	0.00678039	0.00525862	0.00117858	26	0.501117
LOC_Os01g12000	expressed protein					2.06447	2.21896	2.31743	2.14308	0.0115667	0.0507138	0.00854867	0.0271254	0.665283	8	0.618744
LOC_Os01g12080	plant-specific domain TIGR01589 family protein, putative, expressed					3.27683	3.16137	3.24919	3.21057	0.0011816	0.00346364	0.00208129	0.00162693	0.845575	19	0.828715
LOC_Os01g12090	ribosomal protein S6 family protein, putative, expressed					2.11568	2.1476	1.94243	2.0245	0.00780283	0.00277256	0.0122759	0.0134947	0.497058	7	0.783715
LOC_Os01g12100	expressed protein					2.36167	2.39248	2.32358	2.31987	0.00157343	0.00224957	0.00278876	0.00302212	0.306632	23	0.550896
LOC_Os01g12130	nodulin MtN3 family protein, putative, expressed					2.86616	2.77518	2.80581	2.7944	0.00219897	0.00949992	0.00316933	0.00296073	0.374178	49	0.760791
LOC_Os01g12160	OsGH3.3 - Probable indole-3-acetic acid-amido synthetase, expressed	JASMONYL-L-ISOLEUCINE SYNTHASE 2	JAR2	jasmonyl-L-isoleucine synthase 2, JASMONATE RESISTANT 2, GRETCHEN HAGEN 3.3	OsJAR2, OsGH3.3, OsGH3-3	1.74147	1.86577	1.90087	1.98373	0.0742064	0.0505167	0.0556809	0.0480991	0.69367	8	0.840216
LOC_Os01g12180	expressed protein					2.27093	2.37843	2.29186	2.38285	0.00195837	0.00269858	0.00855931	0.00290721	0.671416	3	0.761589
LOC_Os01g12190	expressed protein					2.73126	2.71849	2.73397	2.78469	0.00245266	0.0020784	0.0042042	0.00534199	0.677043	37	0.522275
LOC_Os01g12200	expressed protein					3.02202	2.97469	2.9094	2.90652	0.002492	0.00296004	0.00247505	0.00112715	0.65435	1	0.767857
LOC_Os01g12210	aluminum-activated malate transporter, putative, expressed					3.19748	2.92548	3.10266	3.04768	0.00200488	0.0053725	0.00411072	0.00221547	0.780378	5	0.897964
LOC_Os01g12220	uncharacterized protein family UPF0016 domain containing protein, expressed					2.74054	2.7017	2.75883	2.69305	0.00466473	0.00208859	0.00229483	0.00535963	0.750095	50	0.826943
LOC_Os01g12260	vacuolar ATP synthase subunit E, putative, expressed					1.4809	1.45449	1.72315	1.48849	0.0499913	0.0216154	0.0423639	0.0887539	0.532767	21	0.831283
LOC_Os01g12280	hAT dimerisation domain-containing protein, putative, expressed					2.43335	2.43431	2.47693	2.50704	0.0051047	0.00156062	0.0108354	0.0137963	0.733641	44	0.661818
LOC_Os01g12304	esterase, putative, expressed					1.62039	1.53946	1.61593	1.61809	0.00965701	0.0175505	0.0186516	0.0382362	0.223959	40	0.410316
LOC_Os01g12320	GDSL-like lipase/acylhydrolase, putative, expressed	SWEET3B	SWEET3B	GDSL esterase/lipase protein 12	OsSWEET3b, SWEET3b, OsGELP12, OsGELP12a, OsGELP12b, OsGELP12c, GELP12	2.82711	2.70052	2.85088	2.7891	0.00134983	0.00296306	0.00482338	0.0028776	0.830943	5	0.891693
LOC_Os01g12390	inactive receptor kinase At2g26730 precursor, putative, expressed					2.69052	2.59347	2.68834	2.67156	0.00318648	0.00198802	0.00180838	0.00245591	0.63056	17	0.812002
LOC_Os01g12400	S-locus lectin protein kinase family protein, putative, expressed					2.45526	2.53261	2.3817	2.42698	0.00334927	0.00154317	0.00516292	0.00133554	0.630012	51	0.626226
LOC_Os01g12440	AP2 domain containing protein, expressed	ETHYLENE RESPONSE FACTOR 53	ERF53	ethylene response factor 53, APETALA2/ethylene-responsive element binding protein 134	OsERF#053, OsERF053, OsERF53, AP2/EREBP#134, AP2/EREBP134	1.57984	1.65633	1.05825	1.37638	0.0514488	0.0144202	0.0791804	0.0499273	0.451442	37	0.783969
LOC_Os01g12460	expressed protein					1.30276	1.67301	1.19716	1.3887	0.0736466	0.0153592	0.0589397	0.0228391	0.488874	4	0.618018
LOC_Os01g12464	CHCH domain containing protein, expressed					1.37073	1.59908	1.37982	1.46575	0.0143207	0.0140602	0.0172537	0.0192409	0.136183	12	0.755071
LOC_Os01g12470	mitochondrial carrier protein, putative, expressed					2.4366	2.429	2.4543	2.44138	0.00220264	0.00461328	0.00509572	0.00190507	0.565163	48	0.770532
LOC_Os01g12480	expressed protein					2.50109	2.56695	2.44355	2.51044	0.00442252	0.0039957	0.00248507	0.00782055	0.60068	7	0.852941
LOC_Os01g12490	flavin monooxygenase, putative, expressed	YUCCA-LIKE GENE 4	YUCCA4	(YUCCA-like gene)	OsYUCCA4, OsYUC4	1.9665	1.8355	1.96979	1.87267	0.0142677	0.00729085	0.00824662	0.0232597	0.409602	19	0.536027	YUC	temperature
LOC_Os01g12530	smr domain containing protein, expressed					3.21128	3.15957	3.19608	3.1659	0.000319185	0.00119925	0.000679687	0.000316171	0.731106	5	0.89926
LOC_Os01g12540	GTPase of unknown function domain containing protein, putative, expressed					2.53404	2.6576	2.51967	2.61263	0.00196801	0.00399419	0.00257577	0.00661586	0.832407	6	0.94751
LOC_Os01g12560	3-methyl-2-oxobutanoate hydroxymethyltransferase, putative, expressed					2.18325	1.77635	2.01132	1.82218	0.0155667	0.0186069	0.0131673	0.0366374	0.734219	14	0.886625
LOC_Os01g12580	late embryogenesis abundant protein, putative, expressed	LATE EMBRYOGENESIS ABUNDANT PROTEIN	LEA14	late embryogenesis abundant protein 5, endosperm-specific gene 2	Lea14A, OsLEA5, OsEnS-2	1.24318	1.20824	0.927745	0.91645	0.0291447	0.0451496	0.0408213	0.118017	0.177662	33	0.360791
LOC_Os01g12650	reticulon domain containing protein, putative, expressed					2.2868	2.25324	2.32827	2.33547	0.00785768	0.00215892	0.00590363	0.00974319	0.666325	43	0.757386
LOC_Os01g12660	AAA-type ATPase family protein, putative, expressed					1.44012	1.7582	1.52502	1.60972	0.0437856	0.0944186	0.011215	0.0232864	0.204189	33	0.7411
LOC_Os01g12670	expressed protein					2.472	2.50165	2.44842	2.46098	0.00145792	0.00113629	0.00117068	0.0017781	0.286108	7	0.533103
LOC_Os01g12680	C4-dicarboxylate transporter/malic acid transport protein, expressed					2.23803	2.19947	2.23435	2.22619	0.0157696	0.0123888	0.0124171	0.00874246	0.67328	53	0.441162
LOC_Os01g12710	oxidoreductase, short chain dehydrogenase/reductase family domain containing protein, expressed	NON-YELLOW COLORING 1	NYC1	Chlorophyl b degrading enzyme, Chlase, Non-Yellow Coloring 1, non-yellow coloring1, Probable chlorophyll(ide) b reductase NYC1, chloroplastic, Protein NON-YELLOW COLORING 1, short-chain dehydrogenase/reductase NYC1	nyc1, OsNYC1	3.20304	3.17004	3.18164	3.17737	0.000509496	0.00227567	0.000841017	0.000538403	0.765311	1	0.847376
LOC_Os01g12720	protein kinase domain containing protein, expressed					3.07598	3.10475	3.06644	3.08178	0.00105637	0.00116015	0.0028407	0.00171163	0.819356	9	0.895566
LOC_Os01g12730	ras-related protein, putative, expressed			small GTP-binding protein OsRab7B1	OsRab7B1	3.10542	3.04407	3.07154	3.05072	0.000177058	0.00226301	0.00120354	0.000536084	0.667289	5	0.876082
LOC_Os01g12740	cytochrome P450, putative, expressed					2.42411	2.48197	2.36628	2.3675	0.00268017	0.00581286	0.00137748	0.00277576	-0.21758	47	0.65923
LOC_Os01g12750	cytochrome P450, putative, expressed					2.33339	2.25544	2.24432	2.2135	0.00705085	0.00561023	0.00253871	0.00415949	0.380071	42	0.669531
LOC_Os01g12770	cytochrome P450, putative, expressed					2.58977	2.39166	2.56018	2.38823	0.00477942	0.0106357	0.00464197	0.0147691	0.663551	14	0.923244
LOC_Os01g12800	peroxisomal membrane protein, putative, expressed					2.55477	2.4667	2.55067	2.49825	0.00106057	0.00256815	0.00351977	0.00210859	0.722567	5	0.894629
LOC_Os01g12810	retrotransposon protein, putative, unclassified, expressed					3.12909	3.01455	3.11051	3.05396	0.00175198	0.00450392	0.00423381	0.00374243	0.864509	5	0.943586
LOC_Os01g12830	erythronate-4-phosphate dehydrogenase domain containing protein, expressed			hydroxypyruvate reductase 2, cytosolic HPR	OsHPR2, HPR2, OsHPR2-1, OsHPR2-2	3.09588	2.89369	3.07578	2.97116	0.00116787	0.0122362	0.00580435	0.00535258	0.95426	5	0.9841
LOC_Os01g12840	expressed protein					2.6334	2.68053	2.77218	2.79996	0.00466133	0.0053889	0.00233177	0.00145645	0.563411	16	0.847199
LOC_Os01g12860	MYB family transcription factor, putative, expressed					1.79954	1.75366	1.95178	1.87139	0.0207978	0.0081113	0.00857054	0.00696125	0.349081	39	0.538298
LOC_Os01g12870	eukaryotic translation initiation factor 3 subunit E-interacting protein, putative, expressed					2.7704	2.82172	2.74923	2.76941	0.00130644	0.00136435	0.00188178	0.00538679	0.524539	20	0.861318
LOC_Os01g12890	expressed protein					2.49761	2.56534	2.53888	2.56536	0.00117981	0.000549366	0.00155042	0.00141381	0.582448	12	0.684051
LOC_Os01g12900	ras-related protein, putative, expressed	RAC/ROP-TYPE GTPASE 1	RAC1	small GTP-binding protein 1, Rac-like GTP-binding protein 1, GTPase Rac homolog	OsRAC1, OsRac1, Os Rac1	1.77299	2.01331	1.90142	1.78213	0.0123496	0.00609434	0.00666947	0.023976	0.586682	46	0.649885
LOC_Os01g12910	thioesterase family protein, putative, expressed					1.99876	2.0362	2.0176	1.99052	0.00484114	0.0100876	0.00482821	0.00542515	0.243771	48	0.438085
LOC_Os01g12920	thioesterase family protein, putative, expressed					2.22654	2.5393	2.32425	2.33984	0.0187397	0.0241745	0.0345635	0.0291823	0.750364	9	0.83414
LOC_Os01g12950	ubiquitin-conjugating enzyme, putative, expressed					1.89713	2.02806	1.88591	1.98212	0.00999527	0.0099901	0.0171268	0.00255474	0.468426	26	0.836695
LOC_Os01g13000	ethylene-responsive protein related, putative, expressed			basic helix-loop-helix protein 074	OsbHLH074	2.34044	2.30867	2.31911	2.32996	0.00393845	0.00309402	0.00651743	0.00914072	0.514253	15	0.764764
LOC_Os01g13030	OsIAA3 - Auxin-responsive Aux/IAA gene family member, expressed		IAA3	Aux/IAA protein 3	OsIAA3	2.56484	2.7067	2.55356	2.60388	0.00256299	0.00400322	0.00527919	0.00891321	0.465873	46	0.707035
LOC_Os01g13060	CK1_CaseinKinase_1.1 - CK1 includes the casein kinase 1 kinases, expressed					3.13306	3.07992	3.06177	3.05869	0.00161334	0.00389558	0.00380158	0.00227859	0.884126	11	0.955363
LOC_Os01g13080	60S acidic ribosomal protein, putative, expressed					2.46594	2.51596	2.44816	2.49924	0.00330502	0.00637475	0.00503325	0.0080579	0.556235	7	0.811478
LOC_Os01g13090	nucleic acid binding protein, putative, expressed					2.12582	2.21578	2.17542	2.12243	0.00317819	0.00489913	0.00265479	0.00432592	0.221195	46	0.605351
LOC_Os01g13100	KH domain containing protein, putative, expressed					2.71192	2.72991	2.73737	2.73973	0.00192812	0.000636856	0.00102157	0.00070035	0.457109	8	0.785757
LOC_Os01g13120	aquaporin protein, putative, expressed	TONOPLAST INTRINSIC PROTEIN 4;3	TIP4;3	Probable aquaporin TIP4.3, Probable aquaporin TIP4-3, Tonoplast intrinsic protein 4-3	OsTIP4;3, TIP4.3, TIP4-3	1.99535	1.92525	2.02393	1.71534	0.0881436	0.033458	0.0705489	0.0852861	0.821968	28	0.824086
LOC_Os01g13130	aquaporin protein, putative, expressed	TONOPLAST INTRINSIC PROTEIN 4;2	TIP4;2	Probable aquaporin TIP4.2, Probable aquaporin TIP4-2, Tonoplast intrinsic protein 4-2	OsTIP4;2, TIP4.2, TIP4-2	1.30517	1.28518	1.84559	1.78729	0.0929684	0.0174659	0.0210525	0.0215959	0.135609	39	0.639468
LOC_Os01g13150	metallo-beta-lactamase family protein, putative, expressed			tRNase Z3	TRZ3, OsaTRZ3	2.68756	2.88486	2.66297	2.79077	0.00460422	0.0031475	0.0046686	0.0084816	0.902425	4	0.990228
LOC_Os01g13170	ubiquitin-conjugating enzyme E2, putative, expressed					2.78446	2.82024	2.78984	2.78585	0.000773146	0.0014592	0.00261761	0.001011	0.684668	8	0.837394
LOC_Os01g13190	histidinol dehydrogenase, chloroplast precursor, putative, expressed					2.73707	2.77401	2.70711	2.71639	0.000686593	0.0010548	0.00126048	0.00365234	0.393766	20	0.687067
LOC_Os01g13200	abscisic acid insensitive 8, putative, expressed					2.90786	2.94692	2.97697	2.98269	0.00102826	0.00149238	0.000419252	0.00115338	0.660556	16	0.87342
LOC_Os01g13210	salt stress root protein RS1, putative, expressed					3.21349	3.20992	3.29072	3.3112	0.00545117	0.000890464	0.00104113	0.00244042	0.643013	25	0.775587
LOC_Os01g13280	ubiquitin conjugating enzyme protein, putative, expressed					1.61284	1.99261	1.52186	1.96931	0.0496756	0.00937629	0.033448	0.0422015	0.797061	37	0.750456
LOC_Os01g13300	B3 DNA binding domain containing protein, expressed					1.95208	2.08588	1.8104	1.9169	0.0106365	0.00804495	0.0185404	0.0106354	0.596245	6	0.765542
LOC_Os01g13320	pectinesterase, putative, expressed					2.01769	1.95382	1.86937	1.87401	0.00412373	0.0042949	0.00498985	0.00458885	0.14481	5	0.555511
LOC_Os01g13350	25.3 kDa vesicle transport protein, putative, expressed					2.3536	2.37446	2.43974	2.43514	0.00221206	0.000481652	0.00125492	0.00109309	0.211003	8	0.556565
LOC_Os01g13370	seven in absentia protein family domain containing protein, expressed			RING finger protein OsRFPHC-14, RING-HC protein 14	OsRFPHC-14	2.80118	2.74132	2.87166	2.83226	0.00474522	0.00119506	0.00140797	0.00162786	0.854877	28	0.828718
LOC_Os01g13390	expressed protein					3.23377	3.11978	3.1691	3.12808	0.00225687	0.00996126	0.0080059	0.00423318	0.923735	1	0.976823
LOC_Os01g13404	ATP binding protein, putative, expressed					2.53863	2.5465	2.55944	2.58365	0.00197333	0.00148853	0.00257744	0.00113631	0.556768	24	0.748348
LOC_Os01g13420	SOUL heme-binding protein, putative, expressed					2.14858	2.14801	2.14652	2.16203	0.00494134	0.00324706	0.00376659	0.0018741	0.286898	16	0.676844
LOC_Os01g13430	importin-alpha re-exporter, putative, expressed					2.59818	2.69121	2.53043	2.61084	0.00325292	0.00199658	0.0028373	0.00517289	0.79246	7	0.932206
LOC_Os01g13480	glutaredoxin, putative, expressed			GRX-like protein 1, glutaredoxin-like protein 1	OsGRL1	3.27646	3.2276	3.28205	3.25585	0.000458773	0.00268749	0.00214833	0.000901238	0.628996	5	0.784946
LOC_Os01g13490	expressed protein					2.01845	1.93871	1.94058	1.95621	0.00542397	0.0133952	0.00916852	0.00228454	0.447943	11	0.739462
LOC_Os01g13520	auxin response factor 1, putative, expressed	AUXIN RESPONSE FACTOR 16	ARF16	auxin response factor-16, auxin response factor 16, auxin response factor-2, auxin response factor 2, auxin response factor-1, auxin response factor 1	OsARF16, OsARF2, OsARF1	2.74056	2.79741	2.78733	2.87791	0.00251796	0.00549448	0.00142383	0.00207716	0.742343	38	0.976927
LOC_Os01g13530	ABIL2, putative, expressed					1.63216	1.77498	1.43056	1.61625	0.0286188	0.00597076	0.0241124	0.0272221	0.333301	37	0.63519
LOC_Os01g13540	NIN, putative, expressed					3.50602	3.41286	3.48899	3.44018	0.000631429	0.00462085	0.00137703	0.00235836	0.886408	13	0.935265
LOC_Os01g13550	beta-amylase, putative, expressed					2.74413	2.74493	2.73016	2.68934	0.00129267	0.00462255	0.00408431	0.00174096	0.678519	48	0.809102
LOC_Os01g13560	membrane associated DUF588 domain containing protein, putative, expressed					1.39059	1.50643	1.2851	1.25388	0.0569733	0.0203447	0.0996622	0.0768821	0.519616	8	0.600581
LOC_Os01g13570	phosphoglycerate mutase, putative, expressed					2.8119	2.91845	2.73757	2.73838	0.00411863	0.00232619	0.00966029	0.00735991	0.858164	31	0.76972
LOC_Os01g13660	expressed protein					2.36209	2.50759	2.40559	2.44406	0.00373028	0.00374362	0.00217911	0.00182999	0.633972	3	0.802371
LOC_Os01g13690	ligA, putative, expressed					3.52389	3.44787	3.45749	3.2257	0.00166028	0.00752253	0.00231797	0.0344307	0.922969	13	0.830117
LOC_Os01g13700	DNA-binding protein-related, putative, expressed					2.55038	2.56434	2.53617	2.56278	0.00111395	0.00155319	0.0011921	0.00127695	0.309286	38	0.644621
LOC_Os01g13720	expressed protein					2.06649	2.09465	1.95514	2.02196	0.00731369	0.00356965	0.0100799	0.00988389	0.491494	7	0.662508
LOC_Os01g13730	WD domain, G-beta repeat domain containing protein, expressed				OsWD40-11	2.83436	2.90989	2.83027	2.85234	0.00116485	0.000516504	0.000705719	0.00212079	0.765389	7	0.838082
LOC_Os01g13740	myb-like DNA-binding domain containing protein, expressed					3.21139	3.24425	3.19966	3.15682	0.000573681	0.00200757	0.0010455	0.0014178	0.743111	44	0.583541
LOC_Os01g13760	dnaJ domain containing protein, expressed			DnaJ domain protein B1	OsDjB1	3.24082	3.23644	3.23361	3.23073	0.00120518	0.000399527	0.00051878	0.000924798	0.305788	17	0.504092
LOC_Os01g13770	DUF250 domain containing protein, putative, expressed	TRIOSE PHOSPHATE/PHOSPHATE TRANSLOCATOR 1	TPT1	triose phosphate/phosphate translocator	OsTPT1, TPT, tpt	2.84555	2.73062	2.86402	2.78364	0.00505891	0.00546981	0.00256768	0.00561314	0.785381	17	0.87132	OsTPT1	light
LOC_Os01g13800	receptor-like protein kinase 5 precursor, putative, expressed					2.85024	2.9062	2.90563	2.88154	0.00438666	0.00606347	0.00661573	0.00330575	0.773276	10	0.892186
LOC_Os01g13930	expressed protein					2.30498	2.35927	2.28762	2.12135	0.0181261	0.0140497	0.0045495	0.0125512	0.694883	35	0.55943
LOC_Os01g13940	expressed protein					2.16378	2.25495	2.1518	2.21674	0.00286032	0.00537952	0.00551224	0.00782196	0.601594	2	0.80929
LOC_Os01g14020	expressed protein					2.5122	2.36362	2.58127	2.46083	0.00289685	0.0126269	0.00635588	0.0102282	0.792952	5	0.890882
LOC_Os01g14040	D-tyrosyl-tRNA, putative, expressed					2.06419	2.03057	1.86365	1.87941	0.0048384	0.00505244	0.00831348	0.00826223	0.401645	13	0.396056
LOC_Os01g14050	C2 domain containing protein, putative, expressed					2.77404	2.90349	2.83444	2.83446	0.00482167	0.00976327	0.00367273	0.00202911	0.771467	3	0.774184
LOC_Os01g14070	60S ribosomal protein L18a-1, putative, expressed					2.56684	2.50162	2.52922	2.51246	0.00102769	0.00305712	0.00153095	0.00254551	0.503634	1	0.625767
LOC_Os01g14080	lipase class 3 family protein, putative, expressed					1.88744	1.90512	1.89446	1.8524	0.00505375	0.00370264	0.00460773	0.0029736	0.0464499	8	0.407369
LOC_Os01g14090	kinesin motor domain containing protein, putative, expressed					2.3315	2.35157	2.41943	2.39403	0.00912156	0.0070656	0.0120565	0.0156598	0.747642	25	0.565362
LOC_Os01g14100	BT1 family protein, putative, expressed				OsNAF0797	2.50341	2.58255	2.52123	2.54808	0.00103569	0.00329984	0.00249251	0.00267723	0.627809	4	0.754939
LOC_Os01g14110	expressed protein					1.30486	1.40173	1.42111	1.36666	0.0531324	0.00897473	0.0301322	0.00884755	0.176216	29	0.393372
LOC_Os01g14140	X8 domain containing protein, expressed					0.843714	0.986296	1.30116	1.28224	0.0505607	0.0410607	0.0320787	0.0239933	-0.120012	26	0.309771
LOC_Os01g14410	early light-induced protein, chloroplast precursor, putative, expressed	EARLY LIGHT INDUCIBLE PROTEIN	ELIP			3.2984	3.29684	3.09689	3.22027	0.0288855	0.0163696	0.0797493	0.0696694	0.96505	9	0.870341
LOC_Os01g14420	RWP-RK domain-containing protein, putative, expressed					2.13329	2.16196	2.14173	2.12831	0.00297946	0.00235376	0.0041302	0.00660518	0.456422	44	0.530781
LOC_Os01g14440	WRKY1, expressed	WRKY GENE1	WRKY1	Rice WRKY gene1	OsWRKY1	2.38928	2.45014	2.35654	2.37408	0.0198153	0.0156907	0.0141938	0.0255622	0.59961	36	0.844356
LOC_Os01g14510	BRASSINOSTEROID INSENSITIVE 1 precursor, putative, expressed	RECEPTOR-LIKE CYTOPLASMIC KINASE 27	RLCK27	Receptor-like Cytoplasmic Kinase 27	OsRLCK27	2.42519	2.57501	2.32301	2.42245	0.00505947	0.00689057	0.00477846	0.00209702	0.676147	12	0.784407	OsRLCK27	light
LOC_Os01g14580	dehydrogenase, putative, expressed					2.93939	2.86483	2.8854	2.85389	0.000269793	0.000524795	0.000498981	0.000887107	0.690363	30	0.845133
LOC_Os01g14590	pathogen-related protein, putative, expressed					1.79692	1.78322	2.27142	2.12422	0.0232823	0.0183347	0.00771269	0.010191	0.236399	35	0.416014
LOC_Os01g14610	PSF2 - Putative GINS complex subunit, expressed	PARTNER OF SLD FIVE 2	PSF2	partner of Sld five 2		2.40918	2.49773	2.36309	2.45115	0.00199607	0.00163304	0.000920957	0.00287677	0.543573	4	0.892686
LOC_Os01g14630	polyprenyl synthetase, putative, expressed					2.03036	1.37826	1.87501	1.5921	0.124375	0.172332	0.0637369	0.0721891	0.377248	35	0.83025
LOC_Os01g14670	Cupin domain containing protein, expressed					2.66039	2.4141	2.88805	2.68566	0.0270721	0.0283781	0.0042972	0.0305448	0.909938	41	0.882371
LOC_Os01g14690	Lg106, putative, expressed					3.04699	2.99549	3.04403	3.0212	0.000250348	0.0010785	0.000737949	0.000496576	0.65254	19	0.883432
LOC_Os01g14790	expressed protein					2.33047	2.40692	2.16722	2.26046	0.00609726	0.00338073	0.0056952	0.0105615	0.563005	7	0.922378
LOC_Os01g14820	expressed protein					2.44628	2.54765	2.50692	2.51143	0.00133071	0.00499698	0.00203537	0.00172244	0.627326	34	0.841068
LOC_Os01g14830	ribosomal protein L3, putative, expressed					2.22363	2.3609	2.1061	2.23526	0.0105899	0.00533177	0.0101369	0.0133369	0.656076	7	0.90681
LOC_Os01g14840	ZOS1-06 - C2H2 zinc finger protein, expressed					2.90921	2.90732	2.91241	2.91567	0.00126792	0.000878205	0.00208525	0.00146892	0.805096	9	0.817251
LOC_Os01g14870	zinc finger matrin-type protein 5, putative, expressed	ZINC FINGER CCCH DOMAIN-CONTAINING PROTEIN 3	C3H3	Zinc finger CCCH domain-containing protein 3	OsC3H3	1.63459	1.77588	1.5871	1.66608	0.0063521	0.00716742	0.00990099	0.00480445	0.225176	2	0.579603
LOC_Os01g14890	expressed protein					2.46463	2.4135	2.38445	2.27392	0.00201091	0.00437283	0.00717606	0.00395879	0.6733	48	0.762838
LOC_Os01g14920	zinc knuckle family protein, putative, expressed					2.48275	2.5125	2.52993	2.52578	0.00195168	0.000934007	0.000832937	0.00075386	0.3631	29	0.700834
LOC_Os01g14950	importin subunit alpha, putative, expressed	IMPORTIN ALPHA 1A	IMPA1A	importin-alpha1a, importin a1a, importin alpha1a	rImpa1a, Impa1a, Osimpa1, Osimpalpha1	3.15541	3.21704	3.13805	3.17271	0.000893098	0.00149932	0.000898975	0.00173721	0.868355	6	0.923999
LOC_Os01g14980	RPA3 - Putative single-stranded DNA binding complex subunit 3, expressed			Replication protein A 14kDa subunit, replication protein A 14kDa	OsRPA14	2.03278	1.99968	2.09598	2.12287	0.00396474	0.0033915	0.00518449	0.00577549	0.447038	45	0.381781
LOC_Os01g15000	lipase, putative, expressed					2.50481	2.53441	2.51127	2.47758	0.00697287	0.00362871	0.0493523	0.0388916	0.791616	21	0.83542
LOC_Os01g15010	miro, putative, expressed					3.08333	3.0866	3.05668	3.07965	0.00174546	0.00256519	0.00196586	0.00398905	0.924599	9	0.877249
LOC_Os01g15029	expressed protein					2.88227	2.89039	2.98376	2.96309	0.000575817	0.00143031	0.00161068	0.00137394	0.479777	23	0.749473
LOC_Os01g15110	syntaxin, putative, expressed					3.2317	3.15686	3.20461	3.16719	0.000250361	0.00132239	0.000594846	0.000633498	0.87971	5	0.968632
LOC_Os01g15120	hydrolase, alpha/beta fold family domain containing protein, expressed					3.00027	2.89193	2.90054	2.84298	0.00482514	0.00398187	0.00207365	0.00138564	0.895523	1	0.840182
LOC_Os01g15260	dynein light chain type 1 domain containing protein, expressed					2.49587	2.42988	2.44914	2.43034	0.000634407	0.00205083	0.00193037	0.00174795	0.413028	19	0.596896
LOC_Os01g15270	expressed protein					2.88288	2.85459	2.77538	2.64707	0.00361033	0.00712742	0.0123528	0.0142	0.635935	21	0.690206
LOC_Os01g15290	ribosomal L18p/L5e family protein, putative, expressed					2.25225	2.18742	2.22144	2.20909	0.00228542	0.00247959	0.0035069	0.00498066	0.628184	42	0.485074
LOC_Os01g15300	zinc finger helicase family protein, putative, expressed	ZINC FINGER CCCH DOMAIN-CONTAINING PROTEIN 4	C3H4	Zinc finger CCCH domain-containing protein 4	OsC3H4	1.85084	1.84691	1.94792	1.92255	0.00654845	0.00284998	0.00784088	0.00669364	0.0600177	39	0.282887
LOC_Os01g15310	LSM domain containing protein, expressed			Sm gene, Sm family protein		2.66844	2.61446	2.64547	2.63391	0.000435386	0.000623739	0.000668296	0.000634242	0.433056	19	0.65227
LOC_Os01g15320	RALFL9 - Rapid ALkalinization Factor RALF family protein precursor, expressed					2.30313	2.0729	2.36217	2.36269	0.0147772	0.0248309	0.0112644	0.0376358	0.789786	15	0.871413
LOC_Os01g15340	flowering promoting factor-like 1, putative, expressed	ROOT ARCHITECTURE ASSOCIATED 1	RAA1	root architecture associated-1	OsRAA1	1.24436	1.04797	1.4629	1.02265	0.0662685	0.0793016	0.111066	0.0582876	0.347335	39	0.671152
LOC_Os01g15350	zinc finger C-x8-C-x5-C-x3-H type family protein, expressed	ZINC FINGER CCCH DOMAIN-CONTAINING PROTEIN 5	C3H5	Zinc finger CCCH domain-containing protein 5, Zinc finger CCCH domain-containing protein ZFN-like 3	OsC3H5	2.3977	2.38319	2.33907	2.38888	0.00142007	0.00143853	0.00215948	0.00151531	0.409182	44	0.271423
LOC_Os01g15390	expressed protein					1.11975	1.23837	1.23705	1.20156	0.0305116	0.0292922	0.035398	0.0481856	0.0453701	26	0.470893
LOC_Os01g15448	expressed protein	DOPPELGANGER 1	DPL1			1.87851	1.86414	1.81437	1.82108	0.00620192	0.00357607	0.0111398	0.00770263	0.209404	9	0.302274
LOC_Os01g15460	zinc finger C-x8-C-x5-C-x3-H type family protein, expressed	ZINC FINGER CCCH DOMAIN-CONTAINING PROTEIN 6	C3H6	Zinc finger CCCH domain-containing protein 6, Zinc finger CCCH domain-containing protein ZFN-like 1	OsC3H6	2.87674	2.86325	2.86497	2.84363	0.00101438	0.00183847	0.000572815	0.000198557	0.620179	19	0.637205
LOC_Os01g15480	EMB3013, putative, expressed					1.83608	1.77895	1.89973	1.78893	0.00972777	0.00308596	0.00657307	0.00728984	0.307569	30	0.542243
LOC_Os01g15490	phosphoadenosine phosphosulfate, putative, expressed					3.23546	3.17836	3.18982	3.16622	0.000341114	0.00147895	0.000811907	0.0013553	0.803507	13	0.908148
[truncated: 17,287 more rows]

## Sheet: G
Supplementary file 1G: characteristics and environmental/developmental models of the 60 clusters in the irrigated field (averaged genotypes) analysis of our data and models transferred to the partial Nagano dataset (PND)
[truncated: 62 more rows]

[truncated: 2 more sheets: H, I]
