# Supplementary material for: Multiple abiotic stimuli are integrated in the regulation of rice gene expression under field conditions
Source: eLife. 2015 Nov 26;4:e08411. doi: 10.7554/eLife.08411 (PMC4718725; doi:10.7554/eLife.08411)
Supplement: Supplementary file 2. — DOI: http://dx.doi.org/10.7554/eLife.08411.012 [file elife-08411-supp2.xlsx]

## Sheet: Sheet1
Date	Time	Temperature (°C)	Relative humidity (%)	Wind speed (m/s)	Atmospheric pressure (hPa)	Precipitation (mm)	Solar radiation (W/m2)
2013-01-09	00:00:00	24	95	0.9	1011.1	0	0
2013-01-09	00:15:00	24.1	95	0.9	1011	0	0
2013-01-09	00:30:00	24.2	94	0	1010.8	0	0
2013-01-09	00:45:00	23.9	95	0.4	1010.6	0	0
2013-01-09	01:00:00	24.1	94	0.4	1010.5	0	0
2013-01-09	01:15:00	23.9	95	0.4	1010.4	0	0
2013-01-09	01:30:00	24	95	0	1010.3	0	0
2013-01-09	01:45:00	23.9	95	0	1010.2	0	0
2013-01-09	02:00:00	24	95	0.4	1010	0	0
2013-01-09	02:15:00	23.9	95	0.4	1009.9	0	0
2013-01-09	02:30:00	23.8	96	0.4	1009.7	0	0
2013-01-09	02:45:00	24.1	95	0.9	1009.6	0	0
2013-01-09	03:00:00	24.2	94	0.9	1009.6	0	0
2013-01-09	03:15:00	24.2	94	0.9	1009.5	0	0
2013-01-09	03:30:00	24.4	94	0	1009.5	0	0
2013-01-09	03:45:00	24.4	94	0.9	1009.3	0	0
2013-01-09	04:00:00	24.3	95	0.9	1009.5	0	0
2013-01-09	04:15:00	24.2	95	0.9	1009.7	0	0
2013-01-09	04:30:00	24.1	96	0.4	1009.8	0	0
2013-01-09	04:45:00	24	96	0.4	1009.8	0	0
2013-01-09	05:00:00	23.9	97	0.4	1009.9	0	0
2013-01-09	05:15:00	24	96	0.4	1010.1	0	0
2013-01-09	05:30:00	24.2	96	0.9	1010.2	0	0
2013-01-09	05:45:00	24.2	96	0.9	1010.3	0	0
2013-01-09	06:00:00	24.2	96	0.9	1010.5	0	0
2013-01-09	06:15:00	24.2	96	0.4	1010.7	0	0
2013-01-09	06:30:00	24.2	96	0.4	1010.7	0	0
2013-01-09	06:45:00	24.2	96	0.4	1010.9	0	5
2013-01-09	07:00:00	24.4	96	0	1011.2	0	19
2013-01-09	07:15:00	24.8	94	0.4	1011.4	0	31
2013-01-09	07:30:00	24.8	95	0	1011.4	0	58
2013-01-09	07:45:00	25.5	91	0	1011.6	0	92
2013-01-09	08:00:00	25.9	88	0	1011.8	0	111
2013-01-09	08:15:00	25.9	88	0	1011.8	0	110
2013-01-09	08:30:00	26.4	88	0.4	1012	0	231
2013-01-09	08:45:00	26.9	85	0	1012	0	433
2013-01-09	09:00:00	27.2	85	1.8	1011.9	0	426
2013-01-09	09:15:00	27.4	85	1.8	1011.8	0	508
2013-01-09	09:30:00	27.7	84	2.2	1011.8	0	547
2013-01-09	09:45:00	27.6	85	1.3	1011.7	0	378
2013-01-09	10:00:00	27.6	84	1.8	1011.4	0	327
2013-01-09	10:15:00	27.7	83	1.3	1011.3	0	313
2013-01-09	10:30:00	27.7	84	1.3	1011.2	0	247
2013-01-09	10:45:00	28.3	82	0.9	1011.1	0	437
2013-01-09	11:00:00	29	78	1.8	1010.9	0	520
2013-01-09	11:15:00	29.5	78	2.7	1010.6	0	769
2013-01-09	11:30:00	29.8	76	3.1	1010.4	0	883
2013-01-09	11:45:00	29.7	75	3.1	1010.2	0	772
2013-01-09	12:00:00	29.5	75	3.1	1009.9	0	719
2013-01-09	12:15:00	29.1	76	3.1	1009.7	0	447
2013-01-09	12:30:00	29.1	77	2.7	1009.3	0	410
2013-01-09	12:45:00	29.9	75	2.7	1009.1	0	693
2013-01-09	13:00:00	29.6	76	3.6	1008.9	0	606
2013-01-09	13:15:00	29.5	76	3.1	1008.7	0	509
2013-01-09	13:30:00	29.8	75	3.1	1008.4	0	642
2013-01-09	13:45:00	29.5	75	3.1	1008.2	0	383
2013-01-09	14:00:00	29.3	74	3.1	1008	0	376
2013-01-09	14:15:00	28.9	78	3.1	1007.8	0	344
2013-01-09	14:30:00	29.2	77	3.1	1007.7	0	372
2013-01-09	14:45:00	29.6	75	3.6	1007.6	0	506
2013-01-09	15:00:00	29.5	74	4	1007.6	0	454
2013-01-09	15:15:00	29.3	75	3.6	1007.8	0	407
2013-01-09	15:30:00	29.2	72	4	1007.8	0	390
2013-01-09	15:45:00	28.8	75	3.6	1007.9	0	263
2013-01-09	16:00:00	28.4	76	3.6	1008.2	0	188
2013-01-09	16:15:00	28.1	78	3.1	1008.4	0	167
2013-01-09	16:30:00	27.9	78	4	1008.6	0	142
2013-01-09	16:45:00	27.6	79	3.1	1008.7	0	108
2013-01-09	17:00:00	27.3	79	2.7	1008.9	0	77
2013-01-09	17:15:00	27.1	79	2.2	1009	0	45
2013-01-09	17:30:00	26.8	81	1.8	1009.2	0	19
2013-01-09	17:45:00	26.4	82	1.8	1009.3	0	3
2013-01-09	18:00:00	26.3	82	1.8	1009.3	0	1
2013-01-09	18:15:00	26.1	84	1.3	1009.4	0	0
2013-01-09	18:30:00	25.7	85	0.4	1009.5	0	0
2013-01-09	18:45:00	25.5	87	0.4	1009.7	0	0
2013-01-09	19:00:00	24.9	91	0	1009.7	0	0
2013-01-09	19:15:00	24.7	89	0	1009.8	0	0
2013-01-09	19:30:00	23.8	92	0	1010	0	0
2013-01-09	19:45:00	23.4	93	0	1010	0	0
2013-01-09	20:00:00	23.4	94	0.4	1009.9	0	0
2013-01-09	20:15:00	23.3	94	0.4	1010	0	0
2013-01-09	20:30:00	23.1	94	0	1010.2	0	0
2013-01-09	20:45:00	22.9	95	0	1010.1	0	0
2013-01-09	21:00:00	23.5	94	0.4	1010.3	0	0
2013-01-09	21:15:00	23.8	93	0	1010.2	0	0
2013-01-09	21:30:00	22.7	94	0	1010.2	0	0
2013-01-09	21:45:00	22.4	95	0	1010.3	0	0
2013-01-09	22:00:00	22.7	96	0	1010.3	0	0
2013-01-09	22:15:00	23.2	94	0	1010.3	0	0
2013-01-09	22:30:00	23.9	92	0.4	1010.1	0	0
2013-01-09	22:45:00	23.4	91	0	1010.1	0	0
2013-01-09	23:00:00	24.2	89	0	1010	0	0
2013-01-09	23:15:00	22.9	92	0.4	1009.9	0	0
2013-01-09	23:30:00	22.8	95	0	1009.9	0	0
2013-01-09	23:45:00	24.2	90	1.3	1009.8	0	0
2013-01-10	00:00:00	23.9	91	0.4	1009.7	0	0
2013-01-10	00:15:00	24.1	90	0.4	1009.7	0	0
2013-01-10	00:30:00	23.7	90	0	1009.6	0	0
2013-01-10	00:45:00	23.3	92	0.4	1009.3	0	0
2013-01-10	01:00:00	22.9	94	1.3	1009.4	0	0
2013-01-10	01:15:00	23.5	92	0.9	1009.4	0	0
2013-01-10	01:30:00	23.3	94	0.4	1009	0	0
2013-01-10	01:45:00	23.4	91	0.4	1008.8	0	0
2013-01-10	02:00:00	22.6	95	0.9	1008.7	0	0
2013-01-10	02:15:00	22.9	95	0.9	1008.6	0	0
2013-01-10	02:30:00	23.7	91	0.4	1008.6	0	0
2013-01-10	02:45:00	23.9	90	0.9	1008.4	0	0
2013-01-10	03:00:00	24	89	0.9	1008.4	0	0
2013-01-10	03:15:00	23.8	90	0.9	1008.4	0	0
2013-01-10	03:30:00	22.8	92	0.4	1008.6	0	0
2013-01-10	03:45:00	22.3	94	0.4	1008.7	0	0
2013-01-10	04:00:00	22.3	95	0.4	1008.9	0	0
2013-01-10	04:15:00	21.9	95	0	1009	0	0
2013-01-10	04:30:00	21.8	96	0.4	1009.1	0	0
2013-01-10	04:45:00	21.8	96	0.4	1009.2	0	0
2013-01-10	05:00:00	21.8	96	0.4	1009.2	0	0
2013-01-10	05:15:00	21.4	95	0	1009.2	0	0
2013-01-10	05:30:00	21.3	97	0.4	1009.4	0	0
2013-01-10	05:45:00	21.6	97	0.4	1009.5	0	0
2013-01-10	06:00:00	21.6	96	0.4	1009.8	0	0
2013-01-10	06:15:00	21.5	96	0	1009.9	0	0
2013-01-10	06:30:00	21.6	97	0	1010	0	1
2013-01-10	06:45:00	21.8	97	0.4	1010.1	0	10
2013-01-10	07:00:00	22.1	97	0	1010.2	0	35
2013-01-10	07:15:00	23.6	93	0	1010.4	0	106
2013-01-10	07:30:00	24.6	87	0	1010.4	0	170
2013-01-10	07:45:00	25.1	86	0	1010.6	0	233
2013-01-10	08:00:00	25.5	85	0.4	1010.8	0	289
2013-01-10	08:15:00	26	84	0.4	1010.9	0	341
2013-01-10	08:30:00	26.3	84	0	1010.9	0	391
2013-01-10	08:45:00	27	82	0.4	1010.9	0	438
2013-01-10	09:00:00	27.2	80	0.4	1011	0	492
2013-01-10	09:15:00	27.9	79	1.8	1011	0	548
2013-01-10	09:30:00	28.2	79	4	1010.8	0	600
2013-01-10	09:45:00	28.6	77	4	1010.8	0	643
2013-01-10	10:00:00	28.8	73	4.5	1010.8	0	677
2013-01-10	10:15:00	28.9	74	4.5	1010.8	0	703
2013-01-10	10:30:00	29.2	74	3.6	1010.6	0	741
2013-01-10	10:45:00	29.2	70	4	1010.3	0	756
2013-01-10	11:00:00	29.7	67	4.9	1010.2	0	800
2013-01-10	11:15:00	29.8	68	5.4	1010	0	869
2013-01-10	11:30:00	30.2	66	4.5	1009.9	0	952
2013-01-10	11:45:00	28.5	74	4.5	1009.7	0	209
2013-01-10	12:00:00	28.1	76	4.9	1009.7	0	299
2013-01-10	12:15:00	28	79	4.5	1009.5	0	407
2013-01-10	12:30:00	29.3	71	4.9	1009.4	0	824
2013-01-10	12:45:00	29.1	74	4.9	1009.1	0	772
2013-01-10	13:00:00	29.6	69	4.9	1009	0	823
2013-01-10	13:15:00	29.6	71	4.5	1008.8	0	799
2013-01-10	13:30:00	29.8	70	4	1008.6	0	826
2013-01-10	13:45:00	29.1	72	5.4	1008.4	0	541
2013-01-10	14:00:00	29.2	70	4.5	1008.3	0	635
2013-01-10	14:15:00	29.4	69	4.9	1008.1	0	662
2013-01-10	14:30:00	29.3	70	4.5	1008	0	551
2013-01-10	14:45:00	28.8	72	4.9	1007.9	0	487
2013-01-10	15:00:00	28.8	72	4.5	1007.9	0	372
2013-01-10	15:15:00	28.9	72	4.5	1008	0	507
2013-01-10	15:30:00	28.9	72	4.5	1008.1	0	430
2013-01-10	15:45:00	28.2	72	4.9	1008.3	0	221
2013-01-10	16:00:00	28.3	75	2.7	1008.4	0	341
2013-01-10	16:15:00	27.8	72	3.6	1008.5	0	139
2013-01-10	16:30:00	27.6	73	3.6	1008.6	0	159
2013-01-10	16:45:00	27.5	75	2.2	1008.7	0	146
2013-01-10	17:00:00	27.2	76	2.7	1008.9	0	83
2013-01-10	17:15:00	26.8	77	2.2	1009	0	50
2013-01-10	17:30:00	26.6	79	2.2	1009.1	0	27
2013-01-10	17:45:00	26.3	80	1.3	1009.3	0	11
2013-01-10	18:00:00	26.2	81	1.8	1009.3	0	0
2013-01-10	18:15:00	25.8	82	1.8	1009.4	0	0
2013-01-10	18:30:00	25.7	83	1.3	1009.5	0	0
2013-01-10	18:45:00	25.6	83	1.3	1009.7	0	0
2013-01-10	19:00:00	25.3	84	0.4	1009.8	0	0
2013-01-10	19:15:00	25.4	84	0.9	1009.9	0	0
2013-01-10	19:30:00	25.2	84	0.4	1010.1	0	0
2013-01-10	19:45:00	25.1	85	0.9	1010.3	0	0
2013-01-10	20:00:00	25.1	85	0.4	1010.3	0	0
2013-01-10	20:15:00	24.6	86	0	1010.5	0	0
2013-01-10	20:30:00	24.8	85	0.4	1010.6	0	0
2013-01-10	20:45:00	25	84	0.4	1010.7	0	0
2013-01-10	21:00:00	24.9	84	0.4	1010.9	0	0
2013-01-10	21:15:00	24.7	85	0	1010.9	0	0
2013-01-10	21:30:00	24.7	84	0	1011	0	0
2013-01-10	21:45:00	23.7	88	0.4	1011	0	0
2013-01-10	22:00:00	23.8	87	0	1011.1	0	0
2013-01-10	22:15:00	24.3	85	0.4	1011.2	0	0
2013-01-10	22:30:00	23.7	88	0.4	1011.2	0	0
2013-01-10	22:45:00	24.1	85	0	1011.1	0	0
2013-01-10	23:00:00	24.4	84	0.4	1011.1	0	0
2013-01-10	23:15:00	24.7	83	0.4	1011	0	0
2013-01-10	23:30:00	24.4	85	0	1010.9	0	0
2013-01-10	23:45:00	24.5	84	0	1010.8	0	0
2013-01-11	00:00:00	24.4	85	0	1010.7	0	0
2013-01-11	00:15:00	24.4	86	0	1010.7	0	0
2013-01-11	00:30:00	24.3	87	0.4	1010.5	0	0
2013-01-11	00:45:00	24.4	86	0.4	1010.4	0	0
2013-01-11	01:00:00	24.6	86	0	1010.2	0	0
2013-01-11	01:15:00	23.8	89	0.4	1009.9	0	0
2013-01-11	01:30:00	23.8	89	0.9	1009.7	0	0
2013-01-11	01:45:00	23.8	89	0.4	1009.5	0	0
2013-01-11	02:00:00	24.1	87	0	1009.3	0	0
2013-01-11	02:15:00	24.1	87	0.4	1009.2	0	0
2013-01-11	02:30:00	24.2	87	0	1009.2	0	0
2013-01-11	02:45:00	24.3	87	0.4	1009.1	0	0
2013-01-11	03:00:00	24.7	85	0.4	1008.9	0	0
2013-01-11	03:15:00	24.8	84	0.4	1009.1	0	0
2013-01-11	03:30:00	25	84	0.9	1009.1	0	0
2013-01-11	03:45:00	24.9	84	0.4	1009.2	0	0
2013-01-11	04:00:00	25	84	0	1009.2	0	0
2013-01-11	04:15:00	24.9	85	0.4	1009.4	0	0
2013-01-11	04:30:00	24.9	84	0	1009.5	0	0
2013-01-11	04:45:00	24.9	84	0.4	1009.5	0	0
2013-01-11	05:00:00	24.8	85	0	1009.6	0	0
2013-01-11	05:15:00	24.3	87	0	1009.5	0	0
2013-01-11	05:30:00	24	89	0	1009.6	0	0
2013-01-11	05:45:00	24	89	0	1009.8	0	0
2013-01-11	06:00:00	24.6	87	0	1009.7	0	0
2013-01-11	06:15:00	24.4	88	0	1009.7	0	0
2013-01-11	06:30:00	23.7	91	0	1009.8	0	0
2013-01-11	06:45:00	23.8	91	0	1009.9	0	7
2013-01-11	07:00:00	24.6	88	0	1010.1	0	24
2013-01-11	07:15:00	24.7	88	0	1010.2	0	35
2013-01-11	07:30:00	24.9	87	0	1010.4	0	44
2013-01-11	07:45:00	25.4	85	0	1010.4	0	47
2013-01-11	08:00:00	25.3	86	0	1010.8	0	38
2013-01-11	08:15:00	25.6	84	0	1011	0	45
2013-01-11	08:30:00	25.4	86	0	1011.1	0	30
2013-01-11	08:45:00	25.4	87	0.9	1011.1	0	75
2013-01-11	09:00:00	25.3	87	2.2	1011.1	0	141
2013-01-11	09:15:00	25.3	88	1.8	1011	0	175
2013-01-11	09:30:00	25.3	88	1.3	1011	0	164
2013-01-11	09:45:00	25.1	88	2.7	1011.1	0	143
2013-01-11	10:00:00	24.7	90	2.7	1011.1	0	136
2013-01-11	10:15:00	24.1	92	2.2	1011	0.51	105
2013-01-11	10:30:00	23.9	94	0.9	1010.9	0.76	94
2013-01-11	10:45:00	23.8	95	0.4	1010.8	1.27	72
2013-01-11	11:00:00	23.7	95	0.4	1010.6	0.76	58
2013-01-11	11:15:00	23.8	95	0	1010.4	0.76	73
2013-01-11	11:30:00	23.8	96	0	1010.1	1.27	82
2013-01-11	11:45:00	24	96	0	1010	0.51	85
2013-01-11	12:00:00	24.2	96	0.4	1009.7	0.25	92
2013-01-11	12:15:00	24.3	96	0.4	1009.5	0.25	107
2013-01-11	12:30:00	24.5	95	0.4	1009.5	0	139
2013-01-11	12:45:00	24.6	95	0	1009.3	0	137
2013-01-11	13:00:00	24.6	96	0.4	1009.1	0.25	90
2013-01-11	13:15:00	24.7	96	0.4	1008.9	0	98
2013-01-11	13:30:00	24.8	96	1.3	1008.6	0	133
2013-01-11	13:45:00	24.7	95	1.3	1008.6	0	34
2013-01-11	14:00:00	24.6	96	1.3	1008.5	0	36
2013-01-11	14:15:00	24.4	96	1.8	1008.4	0	43
2013-01-11	14:30:00	24.3	96	1.3	1008.4	0.76	56
2013-01-11	14:45:00	23.9	96	1.3	1008.3	0.51	48
2013-01-11	15:00:00	23.8	97	1.3	1008.4	0.51	60
2013-01-11	15:15:00	23.9	97	1.3	1008.2	0.25	83
2013-01-11	15:30:00	24	96	0.9	1008.4	0.25	98
2013-01-11	15:45:00	24.2	96	0.9	1008.5	1.27	67
2013-01-11	16:00:00	24.2	96	1.3	1008.5	0.51	71
2013-01-11	16:15:00	24.2	96	1.3	1008.5	0	60
2013-01-11	16:30:00	24.2	96	0.9	1008.7	0	38
2013-01-11	16:45:00	24.1	96	0.4	1008.7	1.52	17
2013-01-11	17:00:00	23.9	97	0.9	1009	1.78	13
2013-01-11	17:15:00	23.9	97	1.3	1009.1	0	12
2013-01-11	17:30:00	23.9	97	0.9	1009.1	0	11
2013-01-11	17:45:00	24	97	0.9	1009.3	0	1
2013-01-11	18:00:00	24	97	1.8	1009.2	0	0
2013-01-11	18:15:00	24	97	1.8	1009.2	0	0
2013-01-11	18:30:00	24.1	97	1.3	1009.2	0	0
2013-01-11	18:45:00	24	97	1.8	1009.4	0	0
2013-01-11	19:00:00	23.8	97	1.8	1009.3	0.25	0
2013-01-11	19:15:00	23.8	97	1.8	1009.4	0.25	0
2013-01-11	19:30:00	23.9	98	2.2	1009.6	0.25	0
2013-01-11	19:45:00	23.9	98	1.8	1009.8	0.25	0
2013-01-11	20:00:00	24.1	98	1.3	1009.8	0	0
2013-01-11	20:15:00	24.2	97	0.9	1009.9	0	0
2013-01-11	20:30:00	24.2	97	1.3	1010.1	0	0
2013-01-11	20:45:00	24.2	97	1.3	1010.1	0	0
2013-01-11	21:00:00	24.1	97	0.9	1010.1	1.52	0
2013-01-11	21:15:00	23.9	97	0.9	1010	0.76	0
2013-01-11	21:30:00	23.9	97	0.9	1010	0.51	0
2013-01-11	21:45:00	24.1	97	1.3	1010.1	1.52	0
2013-01-11	22:00:00	24	97	1.3	1010.2	3.3	0
2013-01-11	22:15:00	23.9	98	0.9	1010.3	3.05	0
2013-01-11	22:30:00	23.9	98	0.9	1010.4	2.03	0
2013-01-11	22:45:00	23.9	98	1.3	1010.4	1.78	0
2013-01-11	23:00:00	23.9	98	0.9	1010.6	2.03	0
2013-01-11	23:15:00	24	98	0.4	1010.6	1.02	0
2013-01-11	23:30:00	24.1	98	0.4	1010.4	0.25	0
2013-01-11	23:45:00	23.9	98	0.9	1010.2	0.25	0
2013-01-12	00:00:00	23.9	98	0.9	1010.1	0	0
2013-01-12	00:15:00	23.9	98	0.9	1009.9	0	0
2013-01-12	00:30:00	23.9	98	1.3	1009.8	0	0
2013-01-12	00:45:00	23.9	98	1.8	1009.7	0	0
2013-01-12	01:00:00	23.8	98	1.3	1009.7	0.25	0
2013-01-12	01:15:00	23.7	98	1.8	1009.5	0.51	0
2013-01-12	01:30:00	23.7	98	1.8	1009.5	0	0
2013-01-12	01:45:00	23.7	98	1.3	1009.3	0.25	0
2013-01-12	02:00:00	23.7	98	1.3	1009.3	0	0
2013-01-12	02:15:00	23.7	98	1.3	1009.1	0	0
2013-01-12	02:30:00	23.8	98	0.9	1009.5	2.54	0
2013-01-12	02:45:00	23.8	98	0.9	1009.2	1.52	0
2013-01-12	03:00:00	23.7	98	1.3	1009	1.27	0
2013-01-12	03:15:00	23.7	98	1.3	1008.9	1.27	0
2013-01-12	03:30:00	23.6	98	0.9	1009	0.25	0
2013-01-12	03:45:00	23.6	98	0.9	1009	0.25	0
2013-01-12	04:00:00	23.6	98	1.3	1009.2	0	0
2013-01-12	04:15:00	23.7	99	0.9	1009.1	0.25	0
2013-01-12	04:30:00	23.7	99	1.3	1009.2	0.51	0
2013-01-12	04:45:00	23.8	98	1.8	1009.3	0.76	0
2013-01-12	05:00:00	23.8	98	1.8	1009.2	1.52	0
2013-01-12	05:15:00	23.8	98	1.8	1009.1	2.54	0
2013-01-12	05:30:00	23.7	99	1.8	1009	1.78	0
2013-01-12	05:45:00	23.7	98	1.3	1009.2	1.78	0
2013-01-12	06:00:00	23.7	99	0.4	1009.1	1.78	0
2013-01-12	06:15:00	23.6	99	1.3	1009	0.25	0
2013-01-12	06:30:00	23.6	99	1.3	1009.1	0.25	0
2013-01-12	06:45:00	23.7	99	0.9	1009.3	0.76	0
2013-01-12	07:00:00	23.7	99	0.9	1009.4	2.29	0
2013-01-12	07:15:00	23.7	99	1.8	1009.5	1.27	7
2013-01-12	07:30:00	23.8	99	1.8	1009.8	1.78	11
2013-01-12	07:45:00	23.7	98	2.2	1010.1	1.02	25
2013-01-12	08:00:00	23.8	98	1.3	1010.3	0.51	30
2013-01-12	08:15:00	23.9	98	1.3	1010.4	0	24
2013-01-12	08:30:00	24.1	98	1.3	1010.5	0	47
2013-01-12	08:45:00	24.3	98	1.3	1010.4	0	127
2013-01-12	09:00:00	24.5	97	1.8	1010.3	0	150
2013-01-12	09:15:00	24.7	96	1.8	1010.2	0	209
2013-01-12	09:30:00	25.1	94	2.2	1009.9	0	394
2013-01-12	09:45:00	25.7	92	1.3	1009.9	0	412
2013-01-12	10:00:00	25.9	91	0.9	1009.8	0	295
2013-01-12	10:15:00	25.7	90	0.4	1009.8	0	227
2013-01-12	10:30:00	25.7	91	0	1009.7	0	274
2013-01-12	10:45:00	25.7	92	0	1009.5	0	280
2013-01-12	11:00:00	26.3	89	0.4	1009.5	0.25	408
2013-01-12	11:15:00	26.4	88	0	1009.1	0	453
2013-01-12	11:30:00	27.6	88	0	1008.8	0	754
2013-01-12	11:45:00	27.7	89	0	1008.4	0	784
2013-01-12	12:00:00	28.2	85	0.9	1008.5	0	687
2013-01-12	12:15:00	27	88	1.8	1008.4	0	279
2013-01-12	12:30:00	25.6	93	2.2	1008.1	2.03	170
2013-01-12	12:45:00	25.7	94	1.8	1007.7	0.51	230
2013-01-12	13:00:00	25.9	92	0.9	1007.4	0	285
2013-01-12	13:15:00	26.4	91	0.4	1007.3	0	332
2013-01-12	13:30:00	26.3	91	0.9	1007.1	0	147
2013-01-12	13:45:00	26.5	90	0.9	1006.9	0	280
2013-01-12	14:00:00	27.2	88	1.3	1006.7	0	504
2013-01-12	14:15:00	28.1	85	1.8	1006.5	0	578
2013-01-12	14:30:00	28.3	84	0.9	1006.4	0	418
2013-01-12	14:45:00	28.8	81	0.9	1006.3	0	667
2013-01-12	15:00:00	28.6	81	1.3	1006.3	0	561
2013-01-12	15:15:00	28.3	82	1.3	1006.3	0	308
2013-01-12	15:30:00	28.2	85	1.3	1006.5	0	313
2013-01-12	15:45:00	25.8	91	3.6	1006.8	6.1	38
2013-01-12	16:00:00	24.9	94	1.8	1006.9	0.51	36
2013-01-12	16:15:00	25.3	94	0	1006.9	0	45
2013-01-12	16:30:00	25.6	92	0.4	1007	0	49
2013-01-12	16:45:00	25.4	94	0.4	1007	0	31
2013-01-12	17:00:00	25.5	94	0	1007.1	0	15
2013-01-12	17:15:00	25.3	94	0.4	1007.1	0	8
2013-01-12	17:30:00	25.4	94	0.4	1007.4	0	8
2013-01-12	17:45:00	25.3	95	0.4	1007.5	0	1
2013-01-12	18:00:00	25.2	95	0	1007.7	0.25	0
2013-01-12	18:15:00	25	95	0.4	1007.8	0	0
2013-01-12	18:30:00	25	95	0	1007.9	0	0
2013-01-12	18:45:00	25	95	0	1007.9	0	0
2013-01-12	19:00:00	24.8	96	0	1007.9	0	0
2013-01-12	19:15:00	24.6	95	0	1008	0.25	0
2013-01-12	19:30:00	24.7	96	0	1008	0	0
2013-01-12	19:45:00	24.6	96	0	1008.1	0	0
2013-01-12	20:00:00	24.4	96	0.4	1008.1	0	0
2013-01-12	20:15:00	24.4	96	0.4	1008.1	0	0
2013-01-12	20:30:00	24.4	97	0	1008	0	0
2013-01-12	20:45:00	24.3	97	0	1008	0	0
2013-01-12	21:00:00	24.1	97	0	1007.9	0	0
2013-01-12	21:15:00	24.1	97	0	1007.9	0	0
2013-01-12	21:30:00	24	97	0	1007.9	0	0
2013-01-12	21:45:00	23.9	97	0	1007.9	0	0
2013-01-12	22:00:00	23.9	97	0	1007.8	0	0
2013-01-12	22:15:00	24.2	96	0	1007.7	0	0
2013-01-12	22:30:00	24.1	96	0.4	1007.7	0	0
2013-01-12	22:45:00	23.9	96	0.4	1007.7	0	0
2013-01-12	23:00:00	23.8	96	0.4	1007.6	0	0
2013-01-12	23:15:00	23.8	97	0.4	1007.6	0	0
2013-01-12	23:30:00	23.8	97	0.9	1007.5	0	0
2013-01-12	23:45:00	23.7	96	0.4	1007.4	0	0
2013-01-13	00:00:00	23.6	97	0	1007.3	0	0
2013-01-13	00:15:00	23.5	97	0	1007.2	0	0
2013-01-13	00:30:00	23.4	97	0	1007.2	0	0
2013-01-13	00:45:00	23.6	97	0.4	1007.2	0	0
2013-01-13	01:00:00	23.5	97	0.4	1007.2	0	0
2013-01-13	01:15:00	23.4	97	0.4	1007.3	0	0
2013-01-13	01:30:00	23.3	97	0.4	1007.3	0	0
2013-01-13	01:45:00	23.2	97	0.4	1007	0	0
2013-01-13	02:00:00	23.2	98	0.9	1007	0	0
2013-01-13	02:15:00	23.3	98	0.9	1006.9	0	0
2013-01-13	02:30:00	23.3	97	0	1006.8	0	0
2013-01-13	02:45:00	23.2	98	0	1006.8	0	0
2013-01-13	03:00:00	23.2	98	0	1006.9	0	0
2013-01-13	03:15:00	23.2	98	0	1006.8	0	0
2013-01-13	03:30:00	23.3	98	0	1006.9	0	0
2013-01-13	03:45:00	23.3	98	0	1006.7	0	0
2013-01-13	04:00:00	23.2	98	0	1006.7	0	0
2013-01-13	04:15:00	22.9	98	0	1006.8	0	0
2013-01-13	04:30:00	22.9	98	0.9	1007.1	0	0
2013-01-13	04:45:00	22.8	98	0.4	1007.2	0	0
2013-01-13	05:00:00	22.7	98	0	1007.1	0	0
2013-01-13	05:15:00	22.6	99	0	1007.1	0	0
2013-01-13	05:30:00	22.4	98	0	1007.1	0	0
2013-01-13	05:45:00	22.3	98	0	1007.1	0	0
2013-01-13	06:00:00	22.3	99	0.4	1007.1	0	0
2013-01-13	06:15:00	22.2	99	0	1007.1	0	0
2013-01-13	06:30:00	22.2	99	0	1007.2	0	0
2013-01-13	06:45:00	22.2	99	0	1007.3	0	10
2013-01-13	07:00:00	22.5	99	0	1007.4	0	54
2013-01-13	07:15:00	22.9	99	0	1007.6	0	103
2013-01-13	07:30:00	23.4	98	0.4	1007.6	0	161
2013-01-13	07:45:00	24.3	97	0.9	1007.7	0	221
2013-01-13	08:00:00	24.9	94	1.3	1007.9	0	281
2013-01-13	08:15:00	25.7	92	0.4	1008.2	0	329
2013-01-13	08:30:00	25.9	91	0	1008.2	0	360
2013-01-13	08:45:00	26.8	87	0.4	1008.1	0	439
2013-01-13	09:00:00	27.1	85	1.8	1008.1	0	480
2013-01-13	09:15:00	27.6	86	1.8	1008	0	522
2013-01-13	09:30:00	27.9	86	1.8	1008	0	560
2013-01-13	09:45:00	27.8	86	1.8	1007.9	0	594
2013-01-13	10:00:00	27.9	86	1.8	1007.9	0	634
2013-01-13	10:15:00	27.9	85	2.2	1007.8	0	652
2013-01-13	10:30:00	28.3	85	2.2	1007.6	0	697
2013-01-13	10:45:00	28.4	85	1.8	1007.4	0	719
2013-01-13	11:00:00	28.6	85	2.2	1007.3	0	737
2013-01-13	11:15:00	28.6	86	2.2	1007.2	0	774
2013-01-13	11:30:00	28.9	79	1.8	1007	0	805
2013-01-13	11:45:00	28.5	83	2.2	1006.8	0	392
2013-01-13	12:00:00	29.1	82	1.8	1006.7	0	683
2013-01-13	12:15:00	29.3	81	1.8	1006.6	0	764
2013-01-13	12:30:00	29.3	78	2.2	1006.3	0	768
2013-01-13	12:45:00	29.6	76	2.2	1006	0	770
2013-01-13	13:00:00	29.8	76	1.8	1005.8	0	764
2013-01-13	13:15:00	30.3	74	1.3	1005.6	0	758
2013-01-13	13:30:00	30.4	71	1.8	1005.4	0	797
2013-01-13	13:45:00	30.1	72	2.2	1005.2	0	597
2013-01-13	14:00:00	29.5	76	1.8	1005.1	0	262
2013-01-13	14:15:00	29.7	72	1.3	1005.1	0	284
2013-01-13	14:30:00	29.9	74	1.3	1005	0	326
2013-01-13	14:45:00	29.3	75	1.3	1005.1	0	127
2013-01-13	15:00:00	28.9	76	0.4	1005.1	0	33
2013-01-13	15:15:00	29.1	77	0.9	1005.2	0	21
2013-01-13	15:30:00	27.4	87	0.9	1005.3	0	24
2013-01-13	15:45:00	27.1	90	0.4	1005.4	0	57
2013-01-13	16:00:00	27.4	88	0	1005.6	0	128
2013-01-13	16:15:00	27.7	88	0	1005.7	0	96
2013-01-13	16:30:00	27.5	87	0.9	1005.8	0	47
2013-01-13	16:45:00	27.5	89	0.4	1006	0	48
2013-01-13	17:00:00	27.4	90	0	1006.2	0	30
2013-01-13	17:15:00	27.2	89	0	1006.2	0	22
2013-01-13	17:30:00	26.6	93	0.4	1006.2	0	8
2013-01-13	17:45:00	26.3	94	0	1006.5	0	4
2013-01-13	18:00:00	26.1	93	0	1006.8	0	0
2013-01-13	18:15:00	26.1	92	0.4	1006.8	0	0
2013-01-13	18:30:00	26.2	92	0.9	1007	0	0
2013-01-13	18:45:00	26.8	88	2.7	1007.2	0	0
2013-01-13	19:00:00	26.8	88	3.6	1007.4	0	0
2013-01-13	19:15:00	26.7	88	2.2	1007.4	0	0
2013-01-13	19:30:00	26.7	88	2.7	1007.7	0	0
2013-01-13	19:45:00	26.6	85	2.7	1007.9	0	0
2013-01-13	20:00:00	26.7	83	3.1	1008.1	0	0
2013-01-13	20:15:00	26.8	82	3.1	1008.2	0	0
2013-01-13	20:30:00	26.8	83	2.7	1008.4	0	0
2013-01-13	20:45:00	26.7	83	2.7	1008.5	0	0
2013-01-13	21:00:00	26.7	81	3.1	1008.6	0	0
2013-01-13	21:15:00	26.6	81	3.1	1008.7	0	0
2013-01-13	21:30:00	26.5	82	4	1008.7	0	0
2013-01-13	21:45:00	26.4	82	4	1008.6	0	0
2013-01-13	22:00:00	26.3	82	4	1008.6	0	0
2013-01-13	22:15:00	26.2	82	3.6	1008.7	0	0
2013-01-13	22:30:00	26	82	3.1	1008.7	0	0
2013-01-13	22:45:00	25.9	83	3.1	1008.8	0	0
2013-01-13	23:00:00	25.9	82	3.1	1009	0	0
2013-01-13	23:15:00	25.8	83	3.1	1008.9	0	0
2013-01-13	23:30:00	25.7	83	2.7	1008.8	0	0
2013-01-13	23:45:00	25.6	84	2.2	1008.8	0	0
2013-01-14	00:00:00	25.5	84	2.7	1008.7	0	0
2013-01-14	00:15:00	25.4	84	2.7	1008.6	0	0
2013-01-14	00:30:00	25.4	83	2.7	1008.4	0	0
2013-01-14	00:45:00	25.4	83	3.1	1008.4	0	0
2013-01-14	01:00:00	25.3	83	3.1	1008.3	0	0
2013-01-14	01:15:00	25.2	83	2.7	1008.3	0	0
2013-01-14	01:30:00	25.3	83	3.6	1008	0	0
2013-01-14	01:45:00	25.1	84	3.1	1007.8	0	0
2013-01-14	02:00:00	25	84	3.1	1007.8	0	0
2013-01-14	02:15:00	24.9	84	3.1	1007.8	0	0
2013-01-14	02:30:00	24.9	83	3.1	1007.7	0	0
2013-01-14	02:45:00	24.8	84	2.7	1007.7	0	0
2013-01-14	03:00:00	24.8	83	3.6	1007.7	0	0
2013-01-14	03:15:00	24.7	84	3.6	1007.8	0	0
2013-01-14	03:30:00	24.7	83	4	1007.9	0	0
2013-01-14	03:45:00	24.6	83	3.6	1008	0	0
2013-01-14	04:00:00	24.6	83	3.6	1008.3	0	0
2013-01-14	04:15:00	24.6	83	3.1	1008.5	0	0
2013-01-14	04:30:00	24.5	82	3.1	1008.6	0	0
2013-01-14	04:45:00	24.4	82	3.1	1008.6	0	0
2013-01-14	05:00:00	24.4	82	3.1	1008.7	0	0
2013-01-14	05:15:00	24.3	82	3.6	1008.8	0	0
2013-01-14	05:30:00	24.3	82	2.7	1009	0	0
2013-01-14	05:45:00	24.2	82	2.2	1009	0	0
2013-01-14	06:00:00	24	83	1.8	1009.1	0	0
2013-01-14	06:15:00	24	82	2.7	1009.2	0	0
2013-01-14	06:30:00	24	82	2.7	1009.5	0	1
2013-01-14	06:45:00	23.9	83	2.7	1009.7	0	21
2013-01-14	07:00:00	24.1	83	3.1	1009.8	0	42
2013-01-14	07:15:00	24.2	82	3.1	1009.9	0	50
2013-01-14	07:30:00	24.3	82	2.7	1010.1	0	75
2013-01-14	07:45:00	24.4	82	2.7	1010.4	0	104
2013-01-14	08:00:00	24.6	82	2.7	1010.5	0	131
2013-01-14	08:15:00	24.7	81	2.7	1010.6	0	156
2013-01-14	08:30:00	24.7	81	2.7	1010.7	0	136
2013-01-14	08:45:00	24.8	81	3.1	1010.6	0	143
2013-01-14	09:00:00	25.1	81	2.7	1010.6	0	212
2013-01-14	09:15:00	25.4	78	3.1	1010.5	0	276
2013-01-14	09:30:00	25.7	78	3.1	1010.4	0	256
2013-01-14	09:45:00	25.7	79	2.7	1010.4	0	199
2013-01-14	10:00:00	25.7	79	2.7	1010.4	0	182
2013-01-14	10:15:00	25.4	79	2.2	1010.2	0	139
2013-01-14	10:30:00	25.3	79	2.2	1010.2	0	108
2013-01-14	10:45:00	24.7	84	2.2	1010.3	0	231
2013-01-14	11:00:00	24.2	88	2.2	1010.5	0.25	174
2013-01-14	11:15:00	23.8	90	0.9	1010.6	0.25	172
2013-01-14	11:30:00	24.1	90	0.9	1010.4	0	303
2013-01-14	11:45:00	23.9	90	0.9	1010.4	0	137
2013-01-14	12:00:00	24.3	89	0.4	1010.3	0	223
2013-01-14	12:15:00	24.3	90	0.4	1010.3	0	269
2013-01-14	12:30:00	24.3	91	0.9	1010.2	0	175
2013-01-14	12:45:00	24.3	90	2.2	1010.2	0	127
2013-01-14	13:00:00	24.6	86	3.6	1009.8	0	212
2013-01-14	13:15:00	24.9	86	2.2	1009.8	0	275
2013-01-14	13:30:00	24.9	83	2.7	1009.6	0	289
2013-01-14	13:45:00	25.2	83	2.2	1009.6	0	289
2013-01-14	14:00:00	25.8	83	1.8	1009.5	0	317
2013-01-14	14:15:00	25.9	81	2.2	1009.4	0	300
2013-01-14	14:30:00	26.4	81	1.8	1009.4	0	406
2013-01-14	14:45:00	26.4	81	2.2	1009.4	0	301
2013-01-14	15:00:00	26.3	80	2.7	1009.5	0	202
2013-01-14	15:15:00	26.3	82	2.2	1009.6	0	198
2013-01-14	15:30:00	26.7	81	2.2	1009.7	0	266
2013-01-14	15:45:00	26.6	81	3.1	1009.8	0	196
2013-01-14	16:00:00	26.2	81	3.1	1010.1	0	85
2013-01-14	16:15:00	26.1	82	3.6	1010.3	0	63
2013-01-14	16:30:00	25.5	84	3.1	1010.6	0	70
2013-01-14	16:45:00	25.1	84	2.7	1010.7	0	43
2013-01-14	17:00:00	25	85	2.2	1010.8	0	16
2013-01-14	17:15:00	25.1	85	2.2	1011	0	13
2013-01-14	17:30:00	25	87	1.8	1011.1	0	10
2013-01-14	17:45:00	24.8	87	2.7	1011.3	0	0
2013-01-14	18:00:00	24.6	87	2.7	1011.4	0	0
2013-01-14	18:15:00	24.4	88	2.7	1011.5	0	0
2013-01-14	18:30:00	24.5	87	3.6	1011.8	0	0
2013-01-14	18:45:00	24.4	88	2.2	1012.1	0	0
2013-01-14	19:00:00	24.4	87	2.7	1012.2	0	0
2013-01-14	19:15:00	24.3	87	2.2	1012.3	0	0
2013-01-14	19:30:00	24.3	86	3.1	1012.3	0	0
2013-01-14	19:45:00	24.3	86	4	1012.5	0	0
2013-01-14	20:00:00	24.2	86	3.6	1012.7	0	0
2013-01-14	20:15:00	24.1	87	2.7	1012.8	0	0
2013-01-14	20:30:00	23.9	87	2.7	1012.8	0	0
2013-01-14	20:45:00	23.7	86	3.1	1012.7	0	0
2013-01-14	21:00:00	23.7	86	3.1	1012.7	0	0
2013-01-14	21:15:00	23.6	87	3.1	1012.8	0	0
2013-01-14	21:30:00	23.6	88	2.7	1012.9	0	0
2013-01-14	21:45:00	23.6	88	2.2	1012.8	0	0
2013-01-14	22:00:00	23.6	87	2.7	1012.8	0	0
2013-01-14	22:15:00	23.6	87	2.7	1012.9	0	0
2013-01-14	22:30:00	23.6	87	1.3	1013	0	0
2013-01-14	22:45:00	23.6	86	0.9	1013.1	0	0
2013-01-14	23:00:00	23.5	85	1.3	1013.1	0	0
2013-01-14	23:15:00	23.4	86	1.8	1013	0	0
2013-01-14	23:30:00	23.3	85	2.7	1012.8	0	0
2013-01-14	23:45:00	23.4	84	3.1	1012.8	0	0
2013-01-15	00:00:00	23.4	83	3.1	1012.9	0	0
2013-01-15	00:15:00	23.7	82	3.6	1012.8	0	0
2013-01-15	00:30:00	23.7	83	4	1012.8	0	0
2013-01-15	00:45:00	23.6	83	3.6	1012.9	0	0
2013-01-15	01:00:00	23.6	83	4.9	1012.9	0	0
2013-01-15	01:15:00	23.2	83	4	1012.9	0	0
2013-01-15	01:30:00	23	83	4	1012.8	0	0
2013-01-15	01:45:00	23.1	83	4	1012.7	0	0
2013-01-15	02:00:00	23.2	83	4	1012.8	0	0
2013-01-15	02:15:00	23.2	83	3.6	1012.8	0	0
2013-01-15	02:30:00	23.1	84	3.6	1012.8	0	0
2013-01-15	02:45:00	23	83	3.6	1012.9	0	0
2013-01-15	03:00:00	22.8	84	2.7	1013	0	0
2013-01-15	03:15:00	22.9	83	3.1	1013.1	0	0
2013-01-15	03:30:00	23.1	82	3.6	1013.3	0	0
2013-01-15	03:45:00	23.3	80	4.5	1013.4	0	0
2013-01-15	04:00:00	23.2	79	3.6	1013.5	0	0
2013-01-15	04:15:00	23.3	78	3.6	1013.6	0	0
2013-01-15	04:30:00	23.3	78	3.1	1013.7	0	0
2013-01-15	04:45:00	23.3	78	2.7	1013.8	0	0
2013-01-15	05:00:00	23.4	79	4	1014	0	0
2013-01-15	05:15:00	23.1	81	4	1014.2	0	0
2013-01-15	05:30:00	22.9	80	3.1	1014.2	0	0
2013-01-15	05:45:00	22.8	79	2.7	1014.4	0	0
2013-01-15	06:00:00	22.7	80	1.8	1014.5	0	0
2013-01-15	06:15:00	22.9	78	1.3	1014.5	0	0
2013-01-15	06:30:00	23.1	76	1.8	1014.6	0	1
2013-01-15	06:45:00	22.9	76	1.8	1014.6	0	13
2013-01-15	07:00:00	23.1	76	1.8	1014.8	0	30
2013-01-15	07:15:00	23.3	77	0.9	1015	0	45
2013-01-15	07:30:00	23.3	77	1.8	1015.3	0	59
2013-01-15	07:45:00	23.4	79	1.8	1015.6	0	83
2013-01-15	08:00:00	23.7	79	1.8	1015.7	0	113
2013-01-15	08:15:00	23.9	77	2.2	1015.6	0	155
2013-01-15	08:30:00	24.1	77	3.6	1015.8	0	194
2013-01-15	08:45:00	24.4	79	3.1	1015.7	0	236
2013-01-15	09:00:00	24.8	75	2.2	1015.4	0	302
2013-01-15	09:15:00	25.9	73	2.7	1015.5	0	432
2013-01-15	09:30:00	25.8	72	3.6	1015.6	0	390
2013-01-15	09:45:00	25.9	70	4.5	1015.3	0	510
2013-01-15	10:00:00	25.4	76	4	1015.2	0	378
2013-01-15	10:15:00	25.6	72	4.9	1015.1	0	430
2013-01-15	10:30:00	25.9	74	4.5	1014.9	0	488
2013-01-15	10:45:00	26.3	70	4.9	1014.6	0	647
2013-01-15	11:00:00	26.7	70	5.4	1014.4	0	835
2013-01-15	11:15:00	26.6	70	5.8	1014.3	0	706
2013-01-15	11:30:00	26.8	69	5.8	1014.2	0	895
2013-01-15	11:45:00	27.1	69	5.4	1013.9	0	1023
2013-01-15	12:00:00	26.6	69	5.8	1013.8	0	679
2013-01-15	12:15:00	26.3	68	4.9	1013.8	0	495
2013-01-15	12:30:00	26.4	69	5.8	1013.3	0	536
2013-01-15	12:45:00	26.7	70	6.3	1013.1	0	572
2013-01-15	13:00:00	26.1	70	7.2	1013.1	0	467
2013-01-15	13:15:00	26	70	6.3	1012.9	0	471
2013-01-15	13:30:00	26.2	70	4.9	1012.7	0	462
2013-01-15	13:45:00	26.1	67	4.9	1012.5	0	446
2013-01-15	14:00:00	26.1	69	5.8	1012.5	0	469
2013-01-15	14:15:00	26.2	69	5.8	1012.5	0	473
2013-01-15	14:30:00	26	69	5.4	1012.5	0	383
2013-01-15	14:45:00	25.8	71	4.9	1012.6	0	352
2013-01-15	15:00:00	25.7	71	5.4	1012.7	0	311
2013-01-15	15:15:00	25.5	70	5.4	1012.7	0	279
2013-01-15	15:30:00	25.4	72	5.4	1012.8	0	269
2013-01-15	15:45:00	25.4	71	4.5	1012.9	0	285
2013-01-15	16:00:00	25.1	70	4.5	1013.1	0	207
2013-01-15	16:15:00	24.9	71	4	1013.4	0	161
2013-01-15	16:30:00	24.8	72	3.6	1013.6	0	119
2013-01-15	16:45:00	24.7	73	2.7	1013.6	0	109
2013-01-15	17:00:00	24.6	73	2.7	1013.7	0	88
2013-01-15	17:15:00	24.4	74	2.7	1013.9	0	57
2013-01-15	17:30:00	24.2	76	2.2	1014.3	0	21
2013-01-15	17:45:00	24.1	77	2.2	1014.5	0	7
2013-01-15	18:00:00	24	75	3.1	1014.3	0	0
2013-01-15	18:15:00	23.8	76	3.1	1014.4	0	0
2013-01-15	18:30:00	23.6	77	2.2	1014.3	0	0
2013-01-15	18:45:00	23.7	76	2.2	1014.6	0	0
2013-01-15	19:00:00	23.6	77	1.8	1014.8	0	0
2013-01-15	19:15:00	23.6	77	1.8	1014.8	0	0
2013-01-15	19:30:00	23.4	77	1.3	1014.9	0	0
2013-01-15	19:45:00	23.4	76	0.4	1015	0	0
2013-01-15	20:00:00	23.3	77	0.4	1015	0	0
2013-01-15	20:15:00	23.2	78	0.4	1015	0	0
2013-01-15	20:30:00	22.9	79	0.4	1015.1	0	0
2013-01-15	20:45:00	23.1	79	0.4	1015.1	0	0
2013-01-15	21:00:00	22.9	79	0.4	1015	0	0
2013-01-15	21:15:00	23.2	79	0.4	1014.9	0	0
2013-01-15	21:30:00	22.9	80	0.4	1014.8	0	0
2013-01-15	21:45:00	22.6	82	0.4	1014.8	0	0
2013-01-15	22:00:00	22.4	82	0.4	1014.8	0	0
2013-01-15	22:15:00	22.3	83	0.4	1014.7	0	0
2013-01-15	22:30:00	22.6	83	0.4	1014.7	0	0
2013-01-15	22:45:00	22.8	82	0.4	1014.7	0	0
2013-01-15	23:00:00	22.8	83	0.4	1014.6	0	0
2013-01-15	23:15:00	22.8	84	0.9	1014.6	0	0
2013-01-15	23:30:00	22.9	84	1.3	1014.5	0	0
2013-01-15	23:45:00	23.1	84	0.9	1014.5	0	0
2013-01-16	00:00:00	23	84	0.4	1014.4	0	0
2013-01-16	00:15:00	22.8	85	0	1014.3	0	0
2013-01-16	00:30:00	22.4	86	0	1014.4	0	0
2013-01-16	00:45:00	22.3	88	0	1014.4	0	0
2013-01-16	01:00:00	22.2	89	0	1014.4	0	0
2013-01-16	01:15:00	22.9	85	0.4	1014.3	0	0
2013-01-16	01:30:00	22.8	85	0	1014.1	0	0
2013-01-16	01:45:00	22.9	84	0.4	1014	0	0
2013-01-16	02:00:00	22.8	85	0.4	1014	0	0
2013-01-16	02:15:00	22.8	85	0.4	1013.9	0	0
2013-01-16	02:30:00	22.9	85	0	1013.8	0	0
2013-01-16	02:45:00	22.9	85	0	1013.8	0	0
2013-01-16	03:00:00	23	85	0	1013.9	0	0
2013-01-16	03:15:00	23.1	84	0	1013.9	0	0
2013-01-16	03:30:00	23.1	84	0	1013.9	0	0
2013-01-16	03:45:00	22.9	85	0	1013.9	0	0
2013-01-16	04:00:00	23	86	0	1014.1	0	0
2013-01-16	04:15:00	23	86	0	1014.2	0	0
2013-01-16	04:30:00	23.1	85	0	1014.4	0	0
2013-01-16	04:45:00	23.2	85	0	1014.4	0	0
2013-01-16	05:00:00	23.2	85	0	1014.6	0	0
2013-01-16	05:15:00	23.2	84	0	1014.6	0	0
2013-01-16	05:30:00	23.2	85	0	1014.8	0	0
2013-01-16	05:45:00	23.3	85	0	1015.1	0	0
2013-01-16	06:00:00	23.2	85	0	1015	0	0
2013-01-16	06:15:00	23.1	84	0.4	1015	0	0
2013-01-16	06:30:00	23.1	83	0.4	1015.2	0	0
2013-01-16	06:45:00	23.2	82	0	1015.3	0	8
2013-01-16	07:00:00	23.3	83	0	1015.4	0	23
2013-01-16	07:15:00	23.5	84	0	1015.7	0	37
2013-01-16	07:30:00	23.6	84	0.4	1015.9	0	50
2013-01-16	07:45:00	23.7	86	1.8	1016	0	54
2013-01-16	08:00:00	23.7	86	1.8	1016.2	0	79
2013-01-16	08:15:00	23.8	85	1.3	1016.3	0	104
2013-01-16	08:30:00	23.9	84	0.9	1016.2	0	124
2013-01-16	08:45:00	24.1	84	1.3	1016.2	0	141
2013-01-16	09:00:00	24.3	83	1.3	1016.1	0	180
2013-01-16	09:15:00	24.4	83	1.3	1016	0	178
2013-01-16	09:30:00	24.6	83	1.8	1016	0	137
2013-01-16	09:45:00	24.5	85	1.3	1015.8	0	105
2013-01-16	10:00:00	25.3	83	1.3	1015.8	0	325
2013-01-16	10:15:00	25.2	83	1.3	1015.6	0	238
2013-01-16	10:30:00	25.2	81	3.1	1015.3	0	165
2013-01-16	10:45:00	25.3	83	2.2	1015.1	0	170
2013-01-16	11:00:00	25.7	81	2.2	1014.9	0	254
2013-01-16	11:15:00	25.9	81	3.6	1014.5	0	350
2013-01-16	11:30:00	26.2	79	3.6	1014.3	0	440
2013-01-16	11:45:00	26.7	77	3.1	1013.9	0	549
2013-01-16	12:00:00	26.4	78	4	1013.7	0	408
2013-01-16	12:15:00	26.6	79	3.6	1013.5	0	356
2013-01-16	12:30:00	26.7	75	4.5	1013.3	0	444
2013-01-16	12:45:00	26.3	78	4	1013.1	0	341
2013-01-16	13:00:00	25.9	78	4	1012.9	0	330
2013-01-16	13:15:00	25.6	81	3.6	1012.8	0	204
2013-01-16	13:30:00	25.7	78	4.5	1012.9	0	214
2013-01-16	13:45:00	25.8	78	4	1012.8	0	322
2013-01-16	14:00:00	25.9	78	4.5	1012.7	0	411
2013-01-16	14:15:00	26.1	77	4	1012.5	0	434
2013-01-16	14:30:00	26.1	77	3.1	1012.5	0	310
2013-01-16	14:45:00	25.8	78	4	1012.5	0	153
2013-01-16	15:00:00	25.5	79	4	1012.6	0	119
2013-01-16	15:15:00	25.3	80	3.1	1012.8	0	110
2013-01-16	15:30:00	25.2	81	2.7	1013	0	129
2013-01-16	15:45:00	25.2	81	2.7	1013.2	0	131
2013-01-16	16:00:00	25.1	81	3.1	1013.4	0	113
2013-01-16	16:15:00	24.9	81	2.7	1013.5	0	129
2013-01-16	16:30:00	24.8	81	3.6	1013.6	0	113
2013-01-16	16:45:00	24.7	83	2.7	1013.8	0	66
2013-01-16	17:00:00	24.7	83	1.8	1013.8	0	73
2013-01-16	17:15:00	24.5	83	0.9	1013.9	0	76
2013-01-16	17:30:00	24.3	83	0.9	1014.1	0	50
2013-01-16	17:45:00	24.1	83	0.9	1014.2	0	17
2013-01-16	18:00:00	24.1	83	0.9	1014.4	0	1
2013-01-16	18:15:00	24	83	0.4	1014.4	0	0
2013-01-16	18:30:00	23.7	84	1.3	1014.5	0	0
2013-01-16	18:45:00	23.6	84	1.3	1014.5	0	0
2013-01-16	19:00:00	23.4	85	1.3	1014.7	0	0
2013-01-16	19:15:00	23.3	85	0.9	1014.8	0	0
2013-01-16	19:30:00	23.3	84	0.9	1014.9	0	0
2013-01-16	19:45:00	23.2	84	0.4	1014.9	0	0
2013-01-16	20:00:00	23.1	84	0.4	1015	0	0
2013-01-16	20:15:00	23.1	84	0.9	1015	0	0
2013-01-16	20:30:00	23.1	84	0.9	1015	0	0
2013-01-16	20:45:00	22.9	85	0.4	1015	0	0
2013-01-16	21:00:00	22.3	87	0	1015	0	0
2013-01-16	21:15:00	22.4	87	0.4	1014.9	0	0
2013-01-16	21:30:00	22.1	88	0	1014.9	0	0
2013-01-16	21:45:00	22.7	86	0	1015	0	0
2013-01-16	22:00:00	22.7	87	0	1014.8	0	0
2013-01-16	22:15:00	22.7	87	0	1014.8	0	0
2013-01-16	22:30:00	22.8	86	0	1014.8	0	0
2013-01-16	22:45:00	23.3	84	0.4	1014.9	0	0
2013-01-16	23:00:00	23.4	83	0.9	1014.9	0	0
2013-01-16	23:15:00	23.5	83	1.8	1014.9	0	0
2013-01-16	23:30:00	23.4	83	0.9	1015	0	0
2013-01-16	23:45:00	23.3	84	1.3	1015	0	0
2013-01-17	00:00:00	23.3	83	0.9	1015.1	0	0
2013-01-17	00:15:00	23.3	84	0.4	1015	0	0
2013-01-17	00:30:00	23.2	83	0.4	1014.9	0	0
2013-01-17	00:45:00	23.1	84	0.4	1014.8	0	0
2013-01-17	01:00:00	23.2	83	0.9	1014.6	0	0
2013-01-17	01:15:00	23.2	82	0.9	1014.4	0	0
2013-01-17	01:30:00	23.1	82	0.9	1014.3	0	0
2013-01-17	01:45:00	22.9	83	0.9	1014.2	0	0
2013-01-17	02:00:00	23	83	0.4	1014	0	0
2013-01-17	02:15:00	22.4	84	0.4	1014.1	0	0
2013-01-17	02:30:00	22.1	86	0	1014	0	0
2013-01-17	02:45:00	22.4	85	0	1014	0	0
2013-01-17	03:00:00	22.4	85	0	1014	0	0
2013-01-17	03:15:00	21.4	89	0.4	1014.1	0	0
2013-01-17	03:30:00	22.3	86	0.4	1014	0	0
2013-01-17	03:45:00	22.4	86	0	1014.1	0	0
2013-01-17	04:00:00	22.9	84	0.4	1014.1	0	0
2013-01-17	04:15:00	23.1	82	0.4	1014.2	0	0
2013-01-17	04:30:00	22.3	86	0.4	1014.2	0	0
2013-01-17	04:45:00	23	84	0	1014.2	0	0
2013-01-17	05:00:00	23.1	84	0	1014.4	0	0
2013-01-17	05:15:00	23	84	0.4	1014.5	0	0
2013-01-17	05:30:00	22.8	85	0	1014.7	0	0
2013-01-17	05:45:00	22.2	88	0.9	1014.7	0	0
2013-01-17	06:00:00	21.9	88	0.4	1014.9	0	0
2013-01-17	06:15:00	21.5	90	0.4	1015.2	0	0
2013-01-17	06:30:00	21.4	91	0.9	1015.4	0	0
2013-01-17	06:45:00	21.6	91	0.9	1015.7	0	10
2013-01-17	07:00:00	22.4	88	0.4	1015.9	0	49
2013-01-17	07:15:00	23.4	85	0	1016.1	0	98
2013-01-17	07:30:00	23.6	85	0	1016.3	0	137
2013-01-17	07:45:00	24.2	81	0	1016.3	0	311
2013-01-17	08:00:00	24.8	81	0.4	1016.5	0	298
2013-01-17	08:15:00	24.7	81	0.9	1016.6	0	229
2013-01-17	08:30:00	24.9	80	1.3	1016.7	0	295
2013-01-17	08:45:00	25.2	78	0.9	1016.7	0	324
2013-01-17	09:00:00	24.7	81	1.3	1016.6	0	146
2013-01-17	09:15:00	25.2	81	0.9	1016.6	0	234
2013-01-17	09:30:00	26.1	78	1.8	1016.3	0	576
2013-01-17	09:45:00	26.5	75	3.1	1016.2	0	654
2013-01-17	10:00:00	26.8	75	3.6	1016.2	0	667
2013-01-17	10:15:00	25.7	75	3.6	1016.1	0	176
2013-01-17	10:30:00	26.3	76	4	1016.1	0	399
2013-01-17	10:45:00	27.1	73	4	1015.9	0	759
2013-01-17	11:00:00	27.4	69	4	1015.7	0	784
2013-01-17	11:15:00	27.4	70	4	1015.4	0	840
2013-01-17	11:30:00	27.6	70	3.6	1015.2	0	918
2013-01-17	11:45:00	26.8	74	4	1015.1	0	603
2013-01-17	12:00:00	26.3	75	4.5	1014.9	0	250
2013-01-17	12:15:00	27	74	4	1014.5	0	706
2013-01-17	12:30:00	27.4	70	4.5	1014.4	0	853
2013-01-17	12:45:00	27.1	75	4.9	1014.2	0	773
2013-01-17	13:00:00	26.5	75	4.5	1014.1	0	338
2013-01-17	13:15:00	26.9	73	4.5	1014	0	619
2013-01-17	13:30:00	26.9	74	3.6	1013.9	0	309
2013-01-17	13:45:00	27.2	74	4.5	1013.7	0	598
2013-01-17	14:00:00	27.2	71	4	1013.6	0	539
2013-01-17	14:15:00	27.2	71	4.5	1013.5	0	610
2013-01-17	14:30:00	27.3	70	4	1013.3	0	512
2013-01-17	14:45:00	27.4	70	4.9	1013.3	0	552
2013-01-17	15:00:00	27.3	69	4.5	1013.2	0	545
2013-01-17	15:15:00	27.2	67	4.9	1013.3	0	495
2013-01-17	15:30:00	27	68	4.5	1013.2	0	445
2013-01-17	15:45:00	26.9	67	4.9	1013.2	0	395
2013-01-17	16:00:00	26.8	68	4.5	1013.3	0	341
2013-01-17	16:15:00	26.7	68	4.5	1013.4	0	290
2013-01-17	16:30:00	26.4	68	4	1013.6	0	227
2013-01-17	16:45:00	26.1	70	4.5	1013.6	0	147
2013-01-17	17:00:00	25.7	72	3.6	1013.9	0	93
2013-01-17	17:15:00	25.4	74	2.7	1014	0	51
2013-01-17	17:30:00	25.2	74	2.7	1014.2	0	24
2013-01-17	17:45:00	25.1	76	3.1	1014.4	0	11
2013-01-17	18:00:00	24.6	78	1.3	1014.6	0	0
2013-01-17	18:15:00	24.4	78	1.8	1014.7	0	0
2013-01-17	18:30:00	24.4	78	2.2	1014.8	0	0
2013-01-17	18:45:00	24.2	79	1.8	1015	0	0
2013-01-17	19:00:00	24.2	79	1.3	1015.1	0	0
2013-01-17	19:15:00	23.9	80	0.4	1015.2	0	0
2013-01-17	19:30:00	23.6	81	0.4	1015.3	0	0
2013-01-17	19:45:00	23.2	82	0	1015.4	0	0
2013-01-17	20:00:00	23.6	80	0	1015.5	0	0
2013-01-17	20:15:00	23.4	82	0	1015.5	0	0
2013-01-17	20:30:00	23.3	81	0.4	1015.5	0	0
2013-01-17	20:45:00	23.8	80	0	1015.6	0	0
2013-01-17	21:00:00	24	80	0	1015.5	0	0
2013-01-17	21:15:00	24.1	81	0.4	1015.5	0	0
2013-01-17	21:30:00	24	82	0.4	1015.6	0	0
2013-01-17	21:45:00	24.1	81	1.3	1015.5	0	0
2013-01-17	22:00:00	24	80	0.9	1015.5	0	0
2013-01-17	22:15:00	23.9	80	0.9	1015.5	0	0
2013-01-17	22:30:00	23.7	82	0.4	1015.6	0	0
2013-01-17	22:45:00	23.7	82	0	1015.6	0	0
2013-01-17	23:00:00	23.5	82	0.4	1015.5	0	0
2013-01-17	23:15:00	23.3	83	0	1015.5	0	0
2013-01-17	23:30:00	23.4	83	0	1015.5	0	0
2013-01-17	23:45:00	23.5	82	0	1015.6	0	0
2013-01-18	00:00:00	24	80	0.4	1015.5	0	0
2013-01-18	00:15:00	24	81	0	1015.5	0	0
2013-01-18	00:30:00	23.9	81	0.4	1015.4	0	0
2013-01-18	00:45:00	24.2	79	0.4	1015.4	0	0
2013-01-18	01:00:00	24.1	81	0.4	1015.3	0	0
2013-01-18	01:15:00	24.1	79	0.9	1015.2	0	0
2013-01-18	01:30:00	23.9	79	1.3	1015	0	0
2013-01-18	01:45:00	23.8	80	0.9	1014.9	0	0
2013-01-18	02:00:00	23.9	78	1.8	1014.8	0	0
2013-01-18	02:15:00	23.9	79	1.8	1014.8	0	0
2013-01-18	02:30:00	23.8	78	1.8	1014.8	0	0
2013-01-18	02:45:00	23.8	79	2.7	1014.8	0	0
2013-01-18	03:00:00	23.3	80	2.7	1014.9	0	0
2013-01-18	03:15:00	23.2	81	2.2	1014.9	0	0
2013-01-18	03:30:00	23.1	80	2.2	1015	0	0
2013-01-18	03:45:00	23.2	81	2.2	1015.2	0	0
2013-01-18	04:00:00	23.2	80	2.2	1015.3	0	0
2013-01-18	04:15:00	23.1	80	2.2	1015.4	0	0
2013-01-18	04:30:00	22.7	83	0.4	1015.4	0	0
2013-01-18	04:45:00	22.4	84	0.4	1015.6	0	0
2013-01-18	05:00:00	22.5	83	0.4	1015.6	0	0
2013-01-18	05:15:00	22.4	84	0	1015.9	0	0
2013-01-18	05:30:00	22.2	86	0	1016.1	0	0
2013-01-18	05:45:00	22.4	84	0	1016.2	0	0
2013-01-18	06:00:00	22.8	83	1.3	1016.4	0	0
2013-01-18	06:15:00	22.8	83	1.3	1016.6	0	0
2013-01-18	06:30:00	22.8	83	1.3	1016.8	0	0
2013-01-18	06:45:00	22.8	83	2.2	1017	0	0
2013-01-18	07:00:00	22.8	84	1.8	1017.2	0	8
2013-01-18	07:15:00	22.7	84	1.8	1017.4	0	15
2013-01-18	07:30:00	22.7	83	1.3	1017.6	0	23
2013-01-18	07:45:00	22.7	83	1.8	1017.7	0	28
2013-01-18	08:00:00	22.8	84	1.3	1017.9	0	55
2013-01-18	08:15:00	22.8	85	0.9	1018	0	57
2013-01-18	08:30:00	23	83	1.3	1018.3	0	64
2013-01-18	08:45:00	23	84	0.9	1018.2	0	57
2013-01-18	09:00:00	23.2	84	0.9	1018.2	0	110
2013-01-18	09:15:00	23.5	83	0.4	1018.2	0	146
2013-01-18	09:30:00	23.4	82	2.2	1018.3	0	91
2013-01-18	09:45:00	23.8	81	2.2	1018.1	0	198
2013-01-18	10:00:00	24.1	79	2.2	1018.1	0	238
2013-01-18	10:15:00	24.3	78	2.2	1017.7	0	264
2013-01-18	10:30:00	24.5	78	2.2	1017.4	0	310
2013-01-18	10:45:00	25	77	2.7	1017.1	0	343
2013-01-18	11:00:00	25.3	77	2.2	1016.7	0	408
2013-01-18	11:15:00	25.7	76	1.8	1016.4	0	366
2013-01-18	11:30:00	25.4	78	2.7	1016.3	0	260
2013-01-18	11:45:00	25.9	71	4	1016.1	0	422
2013-01-18	12:00:00	26.3	73	4	1015.8	0	500
2013-01-18	12:15:00	26.2	71	3.1	1015.6	0	400
2013-01-18	12:30:00	26.3	72	3.6	1015.3	0	429
2013-01-18	12:45:00	26.2	75	3.1	1015	0	334
2013-01-18	13:00:00	26.3	73	3.1	1014.7	0	399
2013-01-18	13:15:00	26.7	70	4	1014.5	0	510
2013-01-18	13:30:00	26.4	73	4.9	1014.3	0	356
2013-01-18	13:45:00	26.6	72	4.5	1014.2	0	524
2013-01-18	14:00:00	26.6	71	4	1014	0	472
2013-01-18	14:15:00	26.6	72	4.9	1013.9	0	486
2013-01-18	14:30:00	26.1	74	4.5	1013.9	0	260
2013-01-18	14:45:00	26.2	75	3.6	1013.8	0	360
2013-01-18	15:00:00	25.9	74	4.5	1013.7	0	267
2013-01-18	15:15:00	26.1	75	3.6	1013.7	0	319
2013-01-18	15:30:00	26.3	74	3.6	1013.7	0	346
2013-01-18	15:45:00	26.1	73	4	1013.8	0	319
2013-01-18	16:00:00	26.2	72	4.5	1013.9	0	320
2013-01-18	16:15:00	25.9	74	4	1014.1	0	279
2013-01-18	16:30:00	25.7	75	3.1	1014.2	0	214
2013-01-18	16:45:00	25.4	76	3.1	1014.4	0	133
2013-01-18	17:00:00	25.3	76	4	1014.6	0	104
2013-01-18	17:15:00	25	76	2.7	1014.8	0	69
2013-01-18	17:30:00	24.8	77	2.2	1015.1	0	43
2013-01-18	17:45:00	24.7	76	3.1	1015.2	0	13
2013-01-18	18:00:00	24.4	77	2.7	1015.3	0	0
2013-01-18	18:15:00	24.3	77	2.2	1015.4	0	0
2013-01-18	18:30:00	24.3	75	1.3	1015.5	0	0
2013-01-18	18:45:00	24.2	76	0.9	1015.8	0	0
2013-01-18	19:00:00	24.2	77	0.4	1015.9	0	0
2013-01-18	19:15:00	24.2	76	0.4	1016.1	0	0
2013-01-18	19:30:00	24.2	76	0	1016.2	0	0
2013-01-18	19:45:00	24.3	77	0.4	1016.4	0	0
2013-01-18	20:00:00	24.4	77	0	1016.4	0	0
2013-01-18	20:15:00	24.3	76	0.4	1016.4	0	0
2013-01-18	20:30:00	24.3	77	0.9	1016.6	0	0
2013-01-18	20:45:00	24.3	77	0.9	1016.7	0	0
2013-01-18	21:00:00	24.2	78	0.4	1016.8	0	0
2013-01-18	21:15:00	24.1	80	0.9	1016.7	0	0
2013-01-18	21:30:00	23.9	82	0.4	1016.6	0	0
2013-01-18	21:45:00	23.8	83	0.4	1016.7	0	0
2013-01-18	22:00:00	23.7	83	0.4	1016.7	0	0
2013-01-18	22:15:00	23.7	83	1.8	1016.7	0	0
2013-01-18	22:30:00	23.6	84	1.8	1016.6	0	0
2013-01-18	22:45:00	23.3	86	1.8	1016.5	0	0
2013-01-18	23:00:00	23.1	86	0.9	1016.3	0	0
2013-01-18	23:15:00	22.9	87	0	1016.3	0	0
2013-01-18	23:30:00	22.6	88	0.4	1016.2	0	0
2013-01-18	23:45:00	22.8	88	0.9	1016	0	0
2013-01-19	00:00:00	23.2	87	0.4	1016.1	0	0
2013-01-19	00:15:00	23.3	86	0.4	1016	0	0
2013-01-19	00:30:00	23.4	86	0.9	1015.9	0	0
2013-01-19	00:45:00	23.4	85	1.3	1015.7	0	0
2013-01-19	01:00:00	23.4	85	1.3	1015.4	0	0
2013-01-19	01:15:00	23.6	85	0.9	1015.3	0	0
2013-01-19	01:30:00	23.6	85	0	1015.1	0	0
2013-01-19	01:45:00	23.5	86	1.3	1015.1	0	0
2013-01-19	02:00:00	23.6	87	0.9	1015	0	0
2013-01-19	02:15:00	23.7	86	1.8	1015	0	0
2013-01-19	02:30:00	23.4	87	2.2	1014.7	0	0
2013-01-19	02:45:00	23.3	87	2.2	1014.6	0	0
2013-01-19	03:00:00	23.3	87	2.2	1014.5	0	0
2013-01-19	03:15:00	23.2	87	1.3	1014.6	0	0
2013-01-19	03:30:00	23.1	89	3.1	1014.5	0	0
2013-01-19	03:45:00	23	88	2.2	1014.7	0	0
2013-01-19	04:00:00	23.1	87	1.8	1014.8	0	0
2013-01-19	04:15:00	23.1	87	2.2	1014.8	0	0
2013-01-19	04:30:00	22.9	88	1.8	1014.9	0	0
2013-01-19	04:45:00	23	87	1.3	1014.9	0	0
2013-01-19	05:00:00	23.2	87	0.9	1015	0	0
2013-01-19	05:15:00	23.1	88	0	1015	0	0
2013-01-19	05:30:00	23.2	87	0.9	1015	0	0
2013-01-19	05:45:00	23.2	87	0.4	1015.1	0	0
2013-01-19	06:00:00	23.3	87	0.9	1015.2	0	0
2013-01-19	06:15:00	23.3	86	0.9	1015.4	0	0
2013-01-19	06:30:00	23.3	86	0.9	1015.5	0	1
2013-01-19	06:45:00	23.3	86	1.8	1015.6	0	17
2013-01-19	07:00:00	23.6	86	2.7	1015.8	0	61
2013-01-19	07:15:00	23.8	85	3.1	1015.9	0	115
2013-01-19	07:30:00	23.8	85	2.2	1016	0	117
2013-01-19	07:45:00	23.7	85	2.2	1016	0	60
2013-01-19	08:00:00	23.9	84	2.7	1016.2	0	108
2013-01-19	08:15:00	24.4	84	2.2	1016.3	0	143
2013-01-19	08:30:00	24.5	84	2.2	1016.3	0	172
2013-01-19	08:45:00	24.6	83	2.7	1016.4	0	134
2013-01-19	09:00:00	24.9	82	3.6	1016.4	0	216
2013-01-19	09:15:00	25	81	4	1016.4	0	232
2013-01-19	09:30:00	25.2	81	3.1	1016.4	0	244
2013-01-19	09:45:00	25.3	79	3.1	1016.2	0	260
2013-01-19	10:00:00	25.7	79	3.6	1016.2	0	328
2013-01-19	10:15:00	25.7	79	4.9	1016.2	0	252
2013-01-19	10:30:00	25.9	79	4	1015.9	0	331
2013-01-19	10:45:00	26.2	76	4.5	1015.7	0	276
2013-01-19	11:00:00	25.5	79	5.4	1015.7	0	190
2013-01-19	11:15:00	25.6	79	4.5	1015.6	0	269
2013-01-19	11:30:00	26	78	4.5	1015.4	0	348
2013-01-19	11:45:00	26	77	5.4	1015.2	0	338
2013-01-19	12:00:00	26	79	4.5	1015	0	304
2013-01-19	12:15:00	25.5	79	4.9	1014.8	0	181
2013-01-19	12:30:00	24.9	81	4.9	1014.9	0	229
2013-01-19	12:45:00	26.3	79	4.9	1014.8	0	470
2013-01-19	13:00:00	26.6	76	4.9	1014.4	0	488
2013-01-19	13:15:00	25.9	78	5.4	1014.2	0	275
2013-01-19	13:30:00	26.1	78	4.5	1014	0	287
2013-01-19	13:45:00	26.3	76	3.6	1013.7	0	417
2013-01-19	14:00:00	26.5	75	4.9	1013.7	0	414
2013-01-19	14:15:00	26.7	72	4.9	1013.6	0	396
2013-01-19	14:30:00	25.2	82	4.5	1013.5	0	245
2013-01-19	14:45:00	24.7	81	5.4	1013.7	0	170
2013-01-19	15:00:00	25.1	78	5.8	1013.8	0	263
2013-01-19	15:15:00	24.4	80	4.9	1014	0	151
2013-01-19	15:30:00	23.3	88	4.9	1014.4	0	76
2013-01-19	15:45:00	23.5	85	2.7	1014.4	0	103
2013-01-19	16:00:00	23.7	85	3.1	1014.6	0	97
2013-01-19	16:15:00	23.8	84	3.1	1014.7	0	103
2013-01-19	16:30:00	24	82	2.7	1014.8	0	130
2013-01-19	16:45:00	24	83	2.7	1014.9	0	115
2013-01-19	17:00:00	23.9	83	1.8	1015	0	75
2013-01-19	17:15:00	23.9	84	1.3	1015.2	0	36
2013-01-19	17:30:00	23.8	83	2.2	1015.2	0	17
2013-01-19	17:45:00	23.6	85	0.9	1015.4	0	7
2013-01-19	18:00:00	23.5	85	1.3	1015.5	0	0
2013-01-19	18:15:00	23.4	85	0.4	1015.6	0	0
2013-01-19	18:30:00	23.5	85	0.9	1016	0	0
2013-01-19	18:45:00	23.4	85	3.1	1016.4	0	0
2013-01-19	19:00:00	23.3	84	3.6	1016.7	0	0
2013-01-19	19:15:00	23.1	85	1.8	1016.9	0	0
2013-01-19	19:30:00	23.1	85	1.3	1017	0	0
2013-01-19	19:45:00	23	86	1.3	1017.1	0	0
2013-01-19	20:00:00	22.9	86	0.9	1017.3	0	0
2013-01-19	20:15:00	22.8	86	0.9	1017.4	0	0
2013-01-19	20:30:00	22.8	86	0.9	1017.6	0	0
2013-01-19	20:45:00	22.9	86	1.3	1017.4	0	0
2013-01-19	21:00:00	22.8	86	1.8	1017.5	0	0
2013-01-19	21:15:00	22.7	85	0.9	1017.4	0	0
2013-01-19	21:30:00	22.8	85	1.3	1017.4	0	0
2013-01-19	21:45:00	22.7	86	0.9	1017.4	0	0
2013-01-19	22:00:00	22.9	86	1.8	1017.2	0	0
2013-01-19	22:15:00	22.9	86	0.9	1017.2	0	0
2013-01-19	22:30:00	22.8	86	0.4	1017	0	0
2013-01-19	22:45:00	22.4	88	0.4	1016.8	0	0
2013-01-19	23:00:00	22.4	87	0.9	1016.7	0	0
2013-01-19	23:15:00	22.6	86	0.4	1016.8	0	0
2013-01-19	23:30:00	22.2	87	0.9	1016.8	0	0
2013-01-19	23:45:00	22.6	86	0.4	1016.8	0	0
2013-01-20	00:00:00	23	84	0.4	1016.7	0	0
2013-01-20	00:15:00	23.1	86	0.4	1016.6	0	0
2013-01-20	00:30:00	23.2	85	3.1	1016.6	0	0
2013-01-20	00:45:00	23.1	86	3.1	1016.6	0	0
2013-01-20	01:00:00	22.7	88	0.9	1016.7	0	0
2013-01-20	01:15:00	22.8	88	1.3	1016.5	0	0
2013-01-20	01:30:00	22.7	87	1.8	1016.4	0	0
2013-01-20	01:45:00	22.7	86	1.3	1016.2	0	0
2013-01-20	02:00:00	22.6	85	0.9	1016.3	0	0
2013-01-20	02:15:00	22.7	85	0.9	1016.1	0	0
2013-01-20	02:30:00	22.4	86	0.4	1016.1	0	0
2013-01-20	02:45:00	22.6	86	0.4	1016.1	0	0
2013-01-20	03:00:00	22.7	85	0.4	1016	0	0
2013-01-20	03:15:00	22.7	86	0.4	1016	0	0
2013-01-20	03:30:00	22.7	85	1.3	1016.1	0	0
2013-01-20	03:45:00	22.5	85	0.4	1016.1	0	0
2013-01-20	04:00:00	22.2	86	0.4	1016.1	0	0
2013-01-20	04:15:00	22.3	85	0.9	1016	0	0
2013-01-20	04:30:00	22.1	86	0	1016	0	0
2013-01-20	04:45:00	22.2	85	0	1016.1	0	0
2013-01-20	05:00:00	21.3	88	0.9	1016.1	0	0
2013-01-20	05:15:00	21.5	87	0	1016.4	0	0
2013-01-20	05:30:00	21.9	87	0.4	1016.7	0	0
2013-01-20	05:45:00	22.7	85	0.4	1017	0	0
2013-01-20	06:00:00	22.9	85	1.8	1017.1	0	0
2013-01-20	06:15:00	22.9	85	0.9	1017.1	0	0
2013-01-20	06:30:00	22.6	87	0.4	1017.2	0	1
2013-01-20	06:45:00	22.4	89	0	1017.4	0	10
2013-01-20	07:00:00	22.8	87	0	1017.5	0	40
2013-01-20	07:15:00	23.2	86	0	1017.6	0	85
2013-01-20	07:30:00	23.4	86	0.4	1017.7	0	145
2013-01-20	07:45:00	24.1	83	0.4	1017.7	0	237
2013-01-20	08:00:00	24.5	82	0.4	1017.9	0	272
2013-01-20	08:15:00	24.9	82	1.3	1018	0	304
2013-01-20	08:30:00	24.8	81	1.8	1018.1	0	197
2013-01-20	08:45:00	25.7	78	3.6	1018.1	0	370
2013-01-20	09:00:00	26.1	75	4	1017.9	0	500
2013-01-20	09:15:00	26.7	73	3.1	1017.8	0	573
2013-01-20	09:30:00	26.8	75	4	1017.8	0	619
2013-01-20	09:45:00	26.9	71	4.5	1017.7	0	633
2013-01-20	10:00:00	27.5	73	4.5	1017.5	0	635
2013-01-20	10:15:00	27.2	71	4.5	1017.4	0	650
2013-01-20	10:30:00	27.5	67	5.4	1017.3	0	585
2013-01-20	10:45:00	27.2	68	5.4	1017.2	0	477
2013-01-20	11:00:00	27.1	70	4	1017.1	0	277
2013-01-20	11:15:00	26.2	76	4.5	1017	0	240
2013-01-20	11:30:00	26.1	73	5.4	1016.7	0	258
2013-01-20	11:45:00	27.7	71	4.9	1016.4	0	681
2013-01-20	12:00:00	25.9	72	4.9	1016.4	0	162
2013-01-20	12:15:00	26	70	4.5	1016.1	0	200
2013-01-20	12:30:00	27.2	68	4.5	1015.9	0	415
2013-01-20	12:45:00	27.8	66	5.4	1015.5	0	702
2013-01-20	13:00:00	28.1	69	4.9	1015.3	0	922
2013-01-20	13:15:00	27.2	70	4	1015	0	278
2013-01-20	13:30:00	27.9	68	5.4	1014.8	0	792
2013-01-20	13:45:00	27.6	67	4.9	1014.7	0	438
2013-01-20	14:00:00	27.3	70	5.4	1014.5	0	426
2013-01-20	14:15:00	27.1	72	5.4	1014.5	0	564
2013-01-20	14:30:00	27.1	72	5.4	1014.4	0	476
2013-01-20	14:45:00	26.4	74	4.9	1014.5	0	225
2013-01-20	15:00:00	26.8	72	5.4	1014.4	0	401
2013-01-20	15:15:00	27.1	69	4.9	1014.4	0	533
2013-01-20	15:30:00	26.8	70	4.5	1014.3	0	278
2013-01-20	15:45:00	26.7	69	4.5	1014.3	0	362
2013-01-20	16:00:00	26.6	71	4.5	1014.4	0	358
2013-01-20	16:15:00	26.1	72	4	1014.5	0	134
2013-01-20	16:30:00	25.7	74	4	1014.6	0	89
2013-01-20	16:45:00	25.5	72	4.5	1014.9	0	76
2013-01-20	17:00:00	25.2	73	3.1	1015.1	0	59
2013-01-20	17:15:00	25.1	71	3.6	1015.1	0	40
2013-01-20	17:30:00	24.8	73	3.1	1015.3	0	27
2013-01-20	17:45:00	24.6	75	2.7	1015.5	0	14
2013-01-20	18:00:00	24.2	76	2.2	1015.5	0	2
2013-01-20	18:15:00	23.9	77	1.8	1015.6	0	0
2013-01-20	18:30:00	23.6	78	0.9	1015.8	0	0
2013-01-20	18:45:00	23.3	79	0.4	1016	0	0
2013-01-20	19:00:00	23.2	80	0.4	1016.2	0	0
2013-01-20	19:15:00	22.8	81	0	1016.4	0	0
2013-01-20	19:30:00	22.7	82	0	1016.6	0	0
2013-01-20	19:45:00	22.3	83	0.4	1016.8	0	0
2013-01-20	20:00:00	21.8	85	0.4	1016.9	0	0
2013-01-20	20:15:00	21.7	86	0.4	1017	0	0
2013-01-20	20:30:00	22.2	85	0.4	1017.3	0	0
2013-01-20	20:45:00	22.6	83	0.9	1017.3	0	0
2013-01-20	21:00:00	22.6	84	0.4	1017.4	0	0
2013-01-20	21:15:00	22.6	84	0.4	1017.4	0	0
2013-01-20	21:30:00	22.6	84	0.4	1017.4	0	0
2013-01-20	21:45:00	22.7	83	0.4	1017.4	0	0
2013-01-20	22:00:00	22.3	85	0	1017.4	0	0
2013-01-20	22:15:00	22.3	85	0.4	1017.4	0	0
2013-01-20	22:30:00	22.3	85	0	1017.4	0	0
2013-01-20	22:45:00	21.9	87	0	1017.3	0	0
2013-01-20	23:00:00	21.2	88	0	1017.2	0	0
2013-01-20	23:15:00	21.8	88	0	1017.1	0	0
2013-01-20	23:30:00	21.1	89	0	1017.2	0	0
2013-01-20	23:45:00	21	89	0	1017.1	0	0
2013-01-21	00:00:00	20.7	91	0	1016.9	0	0
2013-01-21	00:15:00	20.6	91	0.4	1016.8	0	0
2013-01-21	00:30:00	20.4	93	0.4	1016.6	0	0
2013-01-21	00:45:00	20.7	92	0	1016.4	0	0
2013-01-21	01:00:00	21.3	90	0	1016.2	0	0
2013-01-21	01:15:00	21.1	91	0	1016	0	0
2013-01-21	01:30:00	21.2	91	0.4	1015.9	0	0
2013-01-21	01:45:00	21	91	0	1015.8	0	0
2013-01-21	02:00:00	20.9	91	0	1015.5	0	0
2013-01-21	02:15:00	20.4	93	0.4	1015.4	0	0
2013-01-21	02:30:00	20.8	93	0	1015.3	0	0
2013-01-21	02:45:00	21.4	91	0	1015.2	0	0
2013-01-21	03:00:00	21.6	90	0.4	1015.2	0	0
2013-01-21	03:15:00	21.8	89	0.4	1015	0	0
2013-01-21	03:30:00	21.7	89	0	1014.9	0	0
2013-01-21	03:45:00	21.6	91	0	1015.1	0	0
2013-01-21	04:00:00	21.8	89	0	1015.1	0	0
2013-01-21	04:15:00	21.4	90	0	1015.1	0	0
2013-01-21	04:30:00	22	88	0.4	1015.1	0	0
2013-01-21	04:45:00	21.9	88	0.4	1015.1	0	0
2013-01-21	05:00:00	22.1	88	0.4	1015.2	0	0
2013-01-21	05:15:00	21.4	90	0	1015.3	0	0
2013-01-21	05:30:00	21.8	91	0.4	1015.5	0	0
2013-01-21	05:45:00	22.3	88	0	1015.5	0	0
2013-01-21	06:00:00	22.2	90	0	1015.5	0	0
2013-01-21	06:15:00	22.4	88	0.4	1015.7	0	0
2013-01-21	06:30:00	22.6	89	0.4	1016	0	1
2013-01-21	06:45:00	22.7	88	0	1016.1	0	13
2013-01-21	07:00:00	22.9	87	0	1016.1	0	51
2013-01-21	07:15:00	23.4	86	0	1016.2	0	110
2013-01-21	07:30:00	23.7	86	0	1016.3	0	150
2013-01-21	07:45:00	23.6	87	0	1016.4	0	101
2013-01-21	08:00:00	23.9	87	0	1016.6	0	162
2013-01-21	08:15:00	23.7	88	0	1016.8	0	91
2013-01-21	08:30:00	23.7	88	0.4	1016.9	0	117
2013-01-21	08:45:00	23.3	91	1.3	1017	0	144
2013-01-21	09:00:00	23.6	91	1.3	1016.9	0	185
2013-01-21	09:15:00	24.3	88	1.3	1016.9	0	286
2013-01-21	09:30:00	25.4	84	0.9	1016.8	0	468
2013-01-21	09:45:00	25.1	85	1.3	1016.6	0	359
2013-01-21	10:00:00	25.6	87	0.9	1016.4	0	443
2013-01-21	10:15:00	26.2	83	0.9	1016.2	0	590
2013-01-21	10:30:00	25.5	84	1.3	1016.2	0	113
2013-01-21	10:45:00	24.3	90	3.1	1016.2	0.25	188
2013-01-21	11:00:00	25.2	88	1.3	1015.9	0	391
2013-01-21	11:15:00	25.8	85	1.8	1015.8	0	370
2013-01-21	11:30:00	25.7	85	2.7	1015.7	0	321
2013-01-21	11:45:00	25.6	85	2.2	1015.5	0	251
2013-01-21	12:00:00	25.3	85	3.1	1015.2	0	292
2013-01-21	12:15:00	25.6	85	2.2	1015	0	275
2013-01-21	12:30:00	25.9	84	1.3	1014.7	0	240
2013-01-21	12:45:00	25.7	86	1.8	1014.4	0	183
2013-01-21	13:00:00	25.4	87	2.7	1014.3	0	221
2013-01-21	13:15:00	25.8	85	2.2	1014	0	235
2013-01-21	13:30:00	25.6	87	2.7	1013.9	0	284
2013-01-21	13:45:00	24.9	90	2.2	1013.9	0	116
2013-01-21	14:00:00	25.3	90	1.8	1013.7	0.25	347
2013-01-21	14:15:00	25.3	89	1.3	1013.5	0	278
2013-01-21	14:30:00	25.1	90	1.3	1013.4	0	175
2013-01-21	14:45:00	25.3	88	3.1	1013.2	0	261
2013-01-21	15:00:00	25.2	87	3.6	1013.3	0	185
2013-01-21	15:15:00	25.3	87	3.1	1013.4	0	212
2013-01-21	15:30:00	25.6	87	2.7	1013.4	0	238
2013-01-21	15:45:00	25.6	86	2.7	1013.5	0	189
2013-01-21	16:00:00	25.5	87	2.7	1013.8	0	128
2013-01-21	16:15:00	25.1	89	3.1	1013.9	0	125
2013-01-21	16:30:00	24.5	92	2.2	1014	0	69
2013-01-21	16:45:00	23.9	94	1.3	1014.2	0	44
2013-01-21	17:00:00	23.8	94	0.9	1014.3	0	23
2013-01-21	17:15:00	24	95	0.4	1014.4	0	24
2013-01-21	17:30:00	23.9	95	0	1014.6	0	11
2013-01-21	17:45:00	23.8	95	0	1014.6	0	3
2013-01-21	18:00:00	23.7	95	0.4	1014.7	0	0
2013-01-21	18:15:00	23.5	95	0.9	1014.9	0	0
2013-01-21	18:30:00	23.5	96	0.4	1015	0	0
2013-01-21	18:45:00	23.4	96	0.4	1015.1	0	0
2013-01-21	19:00:00	23.4	96	0.9	1015.2	0	0
2013-01-21	19:15:00	23.4	96	0.9	1015.3	0	0
2013-01-21	19:30:00	23.5	96	0.4	1015.5	0	0
2013-01-21	19:45:00	23.4	96	0.9	1015.7	0.25	0
2013-01-21	20:00:00	23.2	96	0	1015.8	0	0
2013-01-21	20:15:00	23.2	97	0.9	1015.8	0	0
2013-01-21	20:30:00	23.2	97	0.9	1015.8	0	0
2013-01-21	20:45:00	23.2	97	1.3	1015.8	0	0
2013-01-21	21:00:00	23.2	96	0.9	1015.9	0	0
2013-01-21	21:15:00	23.3	96	0.9	1015.9	0	0
2013-01-21	21:30:00	23.3	96	0.9	1015.9	0	0
2013-01-21	21:45:00	23.2	96	0.4	1015.9	0	0
2013-01-21	22:00:00	23.2	96	0.4	1015.9	0	0
2013-01-21	22:15:00	23.2	96	0.4	1015.8	0	0
2013-01-21	22:30:00	23.3	96	0.4	1015.7	0	0
2013-01-21	22:45:00	23.3	96	0.9	1015.6	0	0
2013-01-21	23:00:00	23.4	95	0.4	1015.6	0	0
2013-01-21	23:15:00	23.4	95	0.4	1015.7	0	0
2013-01-21	23:30:00	23.3	95	1.3	1015.8	0	0
2013-01-21	23:45:00	23.1	96	0	1015.7	0.25	0
2013-01-22	00:00:00	23	96	0.4	1015.6	0	0
2013-01-22	00:15:00	22.9	97	0.4	1015.6	0	0
2013-01-22	00:30:00	22.9	97	0	1015.4	0	0
2013-01-22	00:45:00	22.9	97	0.4	1015.4	0	0
2013-01-22	01:00:00	22.9	97	0	1015.3	0	0
2013-01-22	01:15:00	22.9	97	0.4	1015.1	0	0
2013-01-22	01:30:00	23	97	0.9	1014.9	0	0
2013-01-22	01:45:00	23.1	97	0.4	1014.8	0.25	0
2013-01-22	02:00:00	23	97	0.4	1014.6	0.25	0
2013-01-22	02:15:00	22.8	98	0.9	1014.5	0.76	0
2013-01-22	02:30:00	22.8	98	0.4	1014.3	0	0
2013-01-22	02:45:00	22.8	98	0.4	1014.2	0	0
2013-01-22	03:00:00	22.8	98	0.4	1014.2	0.25	0
2013-01-22	03:15:00	22.8	98	0.4	1014.2	0	0
2013-01-22	03:30:00	22.8	98	0.4	1014.2	0	0
2013-01-22	03:45:00	22.8	98	0.9	1014.1	0	0
2013-01-22	04:00:00	22.8	98	0.9	1014.2	0	0
2013-01-22	04:15:00	22.8	98	0.4	1014.2	0	0
2013-01-22	04:30:00	22.9	98	0.4	1014.2	0	0
2013-01-22	04:45:00	22.8	97	0.4	1014.1	0	0
2013-01-22	05:00:00	23.1	95	0.4	1014.1	0	0
2013-01-22	05:15:00	23.2	96	0	1014.2	0	0
2013-01-22	05:30:00	23	96	0.9	1014.2	0	0
2013-01-22	05:45:00	22.9	96	0.9	1014.5	0	0
2013-01-22	06:00:00	22.9	97	0	1014.7	0	0
2013-01-22	06:15:00	22.9	96	0.9	1014.8	0	0
2013-01-22	06:30:00	23	96	0.9	1014.9	0	0
2013-01-22	06:45:00	23.1	95	0.9	1014.9	0	8
2013-01-22	07:00:00	23.1	95	0.9	1014.9	0	31
2013-01-22	07:15:00	23.2	95	0.9	1015.2	0	40
2013-01-22	07:30:00	23.3	95	0.9	1015.2	0	65
2013-01-22	07:45:00	23.8	94	0.4	1015.4	0	106
2013-01-22	08:00:00	24.1	92	0.4	1015.5	0	94
2013-01-22	08:15:00	24.2	91	0.9	1015.5	0	106
2013-01-22	08:30:00	24.6	89	0.9	1015.6	0	202
2013-01-22	08:45:00	25.1	89	1.3	1015.7	0	307
2013-01-22	09:00:00	25	87	1.3	1015.7	0	249
2013-01-22	09:15:00	25.1	89	0.9	1015.6	0	244
2013-01-22	09:30:00	26.3	87	0.9	1015.4	0	546
2013-01-22	09:45:00	26.4	85	1.8	1015.2	0	643
2013-01-22	10:00:00	26.4	83	1.3	1015.2	0	599
2013-01-22	10:15:00	27	82	1.3	1015	0	661
2013-01-22	10:30:00	27.1	83	0.9	1014.9	0	555
2013-01-22	10:45:00	27.3	78	0.4	1014.7	0	624
2013-01-22	11:00:00	27.3	80	1.3	1014.6	0	317
2013-01-22	11:15:00	28.1	76	2.7	1014.5	0	493
2013-01-22	11:30:00	29.1	72	2.7	1014.3	0	899
2013-01-22	11:45:00	29	71	3.1	1014.2	0	796
2013-01-22	12:00:00	28.1	77	2.7	1014	0	609
2013-01-22	12:15:00	28.7	78	2.7	1013.7	0	885
2013-01-22	12:30:00	29.2	68	3.1	1013.4	0	732
2013-01-22	12:45:00	27.9	78	3.1	1013.3	0	398
2013-01-22	13:00:00	28.1	80	3.1	1013	0	520
2013-01-22	13:15:00	28.4	73	3.6	1012.8	0	430
2013-01-22	13:30:00	28.4	74	2.7	1012.7	0	429
2013-01-22	13:45:00	27.2	82	3.1	1012.6	0	354
2013-01-22	14:00:00	26.8	82	3.6	1012.4	0	309
2013-01-22	14:15:00	26.8	81	3.1	1012.3	0	359
2013-01-22	14:30:00	27.9	74	2.7	1012.1	0	403
2013-01-22	14:45:00	27.2	80	2.7	1011.9	0	340
2013-01-22	15:00:00	26.8	82	3.1	1011.9	0	370
2013-01-22	15:15:00	27.1	81	2.7	1011.8	0	402
2013-01-22	15:30:00	27.1	82	2.7	1012	0	311
2013-01-22	15:45:00	27.1	81	2.2	1011.9	0	263
2013-01-22	16:00:00	26.3	83	3.1	1012.2	0	201
2013-01-22	16:15:00	25.8	83	3.6	1012.4	0	126
2013-01-22	16:30:00	25.6	84	4	1012.6	0	95
2013-01-22	16:45:00	24.9	87	3.6	1012.8	0	50
2013-01-22	17:00:00	24.9	88	0.9	1013.2	0	74
2013-01-22	17:15:00	24.8	86	1.3	1013.3	0	30
2013-01-22	17:30:00	24.9	87	0.9	1013.5	0	7
2013-01-22	17:45:00	24.9	86	0.9	1013.7	0	10
2013-01-22	18:00:00	24.9	83	1.8	1013.7	0	0
2013-01-22	18:15:00	24.7	84	2.2	1013.9	0	0
2013-01-22	18:30:00	24.6	86	0.9	1014	0	0
2013-01-22	18:45:00	24.5	86	0.4	1014.3	0	0
2013-01-22	19:00:00	24.4	87	0.4	1014.4	0	0
2013-01-22	19:15:00	24.3	87	0.9	1014.8	0	0
2013-01-22	19:30:00	24.1	87	0.9	1014.9	0	0
2013-01-22	19:45:00	23.9	88	0.4	1015	0	0
2013-01-22	20:00:00	23.8	88	0	1015.1	0	0
2013-01-22	20:15:00	23.5	88	0	1015.3	0	0
2013-01-22	20:30:00	23.3	89	0.4	1015.3	0	0
2013-01-22	20:45:00	23.1	90	0	1015.4	0	0
2013-01-22	21:00:00	22.8	90	0	1015.4	0	0
2013-01-22	21:15:00	22.4	92	0.4	1015.7	0	0
2013-01-22	21:30:00	22.4	92	0.4	1015.9	0	0
2013-01-22	21:45:00	22.7	92	0.4	1016	0	0
2013-01-22	22:00:00	23.2	89	0	1015.9	0	0
2013-01-22	22:15:00	23.3	90	0.9	1015.8	0	0
2013-01-22	22:30:00	23.2	89	0.4	1015.9	0	0
2013-01-22	22:45:00	23.1	90	0	1015.7	0	0
2013-01-22	23:00:00	22.7	91	0.4	1015.8	0	0
2013-01-22	23:15:00	22.6	92	0	1015.7	0	0
2013-01-22	23:30:00	22.7	91	0.4	1015.8	0	0
2013-01-22	23:45:00	22.7	92	0	1015.9	0	0
2013-01-23	00:00:00	22.9	91	0.4	1015.7	0	0
2013-01-23	00:15:00	22.9	91	0.4	1015.8	0	0
2013-01-23	00:30:00	22.7	92	0	1015.6	0	0
2013-01-23	00:45:00	22.6	93	0.4	1015.6	0	0
2013-01-23	01:00:00	22.6	92	0.4	1015.2	0	0
2013-01-23	01:15:00	22.3	93	0.4	1014.9	0	0
2013-01-23	01:30:00	22.5	92	1.3	1014.7	0	0
2013-01-23	01:45:00	22.7	92	0.4	1014.5	0	0
2013-01-23	02:00:00	22.6	91	0	1014.4	0	0
2013-01-23	02:15:00	22.4	93	0	1014.2	0	0
2013-01-23	02:30:00	22.3	93	0	1014	0	0
2013-01-23	02:45:00	22.6	92	0.4	1013.9	0	0
2013-01-23	03:00:00	22.7	91	0.4	1013.7	0	0
2013-01-23	03:15:00	22.2	93	0	1013.7	0	0
2013-01-23	03:30:00	22.2	94	0.4	1013.8	0	0
2013-01-23	03:45:00	22.4	94	0	1013.8	1.02	0
2013-01-23	04:00:00	22.2	96	0.4	1013.5	0.25	0
2013-01-23	04:15:00	22	96	0	1013.5	0	0
2013-01-23	04:30:00	22.1	96	0.4	1013.5	0	0
2013-01-23	04:45:00	22.1	96	0	1013.6	0	0
2013-01-23	05:00:00	22.2	96	0	1013.7	0	0
2013-01-23	05:15:00	22.1	96	0	1013.8	0	0
2013-01-23	05:30:00	22.1	97	0.4	1013.6	0	0
2013-01-23	05:45:00	22.1	97	0	1013.7	0	0
2013-01-23	06:00:00	22.1	96	0	1013.8	0	0
2013-01-23	06:15:00	22.2	96	0.4	1014	0	0
2013-01-23	06:30:00	22.1	97	0.4	1014	0	0
2013-01-23	06:45:00	22.2	97	0.9	1014.3	0	6
2013-01-23	07:00:00	22.3	96	0.4	1014.5	0	20
2013-01-23	07:15:00	22.7	95	0.4	1014.6	0	32
2013-01-23	07:30:00	23	94	0.9	1014.8	0	67
2013-01-23	07:45:00	23.3	94	0.9	1014.9	0	86
2013-01-23	08:00:00	23.5	94	0.4	1015	0	50
2013-01-23	08:15:00	23.6	93	0.4	1015.3	0	68
2013-01-23	08:30:00	23.7	93	0	1015.5	0	45
2013-01-23	08:45:00	23.4	93	0.4	1015.6	0.25	41
2013-01-23	09:00:00	23.4	93	0.4	1015.7	0.25	101
2013-01-23	09:15:00	23.3	94	0.4	1015.7	0	93
2013-01-23	09:30:00	23.6	91	0	1015.5	0	181
2013-01-23	09:45:00	24.2	88	0	1015.2	0	351
2013-01-23	10:00:00	24.7	88	0	1015	0	363
2013-01-23	10:15:00	24.8	87	0.4	1014.9	0	326
2013-01-23	10:30:00	25.1	85	0.9	1014.7	0	384
2013-01-23	10:45:00	25.7	84	0.4	1014.5	0	582
2013-01-23	11:00:00	26.3	82	0.9	1014.5	0	674
2013-01-23	11:15:00	26.1	83	2.2	1014.2	0	581
2013-01-23	11:30:00	26.6	83	1.3	1014	0	642
2013-01-23	11:45:00	25.9	82	1.8	1013.7	0	422
2013-01-23	12:00:00	25.9	84	0.9	1013.4	0	209
2013-01-23	12:15:00	26.9	78	2.2	1013.3	0	376
2013-01-23	12:30:00	27	76	3.1	1013.1	0	436
2013-01-23	12:45:00	27.4	76	3.6	1012.9	0	599
2013-01-23	13:00:00	27.7	75	3.1	1012.6	0	754
2013-01-23	13:15:00	27.7	74	3.6	1012.4	0	699
2013-01-23	13:30:00	27.5	78	2.7	1012	0	597
2013-01-23	13:45:00	27.4	76	2.2	1011.7	0	488
2013-01-23	14:00:00	27.8	75	2.7	1011.4	0	649
2013-01-23	14:15:00	27.8	72	3.1	1011.2	0	585
2013-01-23	14:30:00	27.4	74	3.6	1011.3	0	359
2013-01-23	14:45:00	26.8	78	4	1011.2	0	323
2013-01-23	15:00:00	26.6	77	3.6	1011.3	0	307
2013-01-23	15:15:00	26.6	78	2.7	1011.3	0	270
2013-01-23	15:30:00	26.6	77	2.7	1011.3	0	237
2013-01-23	15:45:00	26.6	75	1.8	1011.4	0	210
2013-01-23	16:00:00	26.5	77	2.7	1011.6	0	187
2013-01-23	16:15:00	26.3	75	2.2	1011.6	0	139
2013-01-23	16:30:00	25.9	74	3.6	1011.7	0	144
2013-01-23	16:45:00	25.7	77	2.2	1011.9	0	118
2013-01-23	17:00:00	25.6	79	1.3	1011.9	0	90
2013-01-23	17:15:00	25.4	80	1.3	1012.1	0	59
2013-01-23	17:30:00	25.3	83	0.9	1012.2	0	33
2013-01-23	17:45:00	24.9	82	0.4	1012.2	0	11
2013-01-23	18:00:00	24.6	84	0.4	1012.5	0	1
2013-01-23	18:15:00	24.4	83	0.4	1012.7	0	0
2013-01-23	18:30:00	24.2	84	0	1012.9	0	0
2013-01-23	18:45:00	23.8	85	0	1013	0	0
2013-01-23	19:00:00	23.7	86	0.4	1013.1	0	0
2013-01-23	19:15:00	23.4	86	0.9	1013.3	0	0
2013-01-23	19:30:00	23.5	85	0.4	1013.3	0	0
2013-01-23	19:45:00	23.2	86	0.4	1013.5	0	0
2013-01-23	20:00:00	22.9	87	0	1013.7	0	0
2013-01-23	20:15:00	22.8	88	0.4	1014	0	0
2013-01-23	20:30:00	22.7	89	0.4	1014.3	0	0
2013-01-23	20:45:00	22.4	90	0.4	1014.4	0	0
2013-01-23	21:00:00	22.4	90	0	1014.5	0	0
2013-01-23	21:15:00	22.6	89	0	1014.4	0	0
2013-01-23	21:30:00	22.8	87	0.4	1014.4	0	0
2013-01-23	21:45:00	22.9	87	0	1014.5	0	0
2013-01-23	22:00:00	22.4	89	0	1014.5	0	0
2013-01-23	22:15:00	21.8	89	0	1014.5	0	0
2013-01-23	22:30:00	21.4	92	0	1014.4	0	0
2013-01-23	22:45:00	21.3	92	0.4	1014.4	0	0
2013-01-23	23:00:00	20.9	93	0.4	1014.3	0	0
2013-01-23	23:15:00	20.6	94	0	1014.4	0	0
2013-01-23	23:30:00	20.9	93	0.4	1014.4	0	0
2013-01-23	23:45:00	21.2	92	0.4	1014.4	0	0
2013-01-24	00:00:00	21.1	91	0	1014.3	0	0
2013-01-24	00:15:00	21	91	0	1014.1	0	0
2013-01-24	00:30:00	21	91	0.4	1014	0	0
2013-01-24	00:45:00	20.9	91	0	1013.8	0	0
2013-01-24	01:00:00	21	91	0	1013.7	0	0
2013-01-24	01:15:00	21.9	88	0	1013.7	0	0
2013-01-24	01:30:00	21.2	88	0	1013.5	0	0
2013-01-24	01:45:00	20.8	90	0	1013.4	0	0
2013-01-24	02:00:00	20.5	91	0	1013.2	0	0
2013-01-24	02:15:00	20.7	91	0	1013	0	0
2013-01-24	02:30:00	20.6	91	0	1012.9	0	0
2013-01-24	02:45:00	20.8	90	0	1012.9	0	0
2013-01-24	03:00:00	20.8	89	0	1012.9	0	0
2013-01-24	03:15:00	21.1	89	0	1012.8	0	0
2013-01-24	03:30:00	20.7	90	0	1012.8	0	0
2013-01-24	03:45:00	20.5	90	0	1012.7	0	0
2013-01-24	04:00:00	20.4	90	0	1012.8	0	0
2013-01-24	04:15:00	21.4	87	0	1012.8	0	0
2013-01-24	04:30:00	20.7	88	0	1012.9	0	0
2013-01-24	04:45:00	19.9	91	0	1013	0	0
2013-01-24	05:00:00	19.8	92	0	1013.1	0	0
2013-01-24	05:15:00	19.8	92	0.9	1013.2	0	0
2013-01-24	05:30:00	20.3	90	0.4	1013.4	0	0
2013-01-24	05:45:00	20.2	90	0.4	1013.6	0	0
2013-01-24	06:00:00	19.8	91	0.4	1013.7	0	0
2013-01-24	06:15:00	19.9	91	0.4	1013.9	0	0
2013-01-24	06:30:00	19.6	91	0	1014	0	2
2013-01-24	06:45:00	19.4	93	0	1014.1	0	17
2013-01-24	07:00:00	20.6	91	0	1014.3	0	57
2013-01-24	07:15:00	22.6	83	0	1014.2	0	107
2013-01-24	07:30:00	22.9	82	0	1014.4	0	109
2013-01-24	07:45:00	23.2	81	0	1014.5	0	155
2013-01-24	08:00:00	23.7	80	0	1014.6	0	255
2013-01-24	08:15:00	24.2	80	0	1014.8	0	311
2013-01-24	08:30:00	24.7	80	0	1014.8	0	395
2013-01-24	08:45:00	25	77	0.4	1014.9	0	452
2013-01-24	09:00:00	25.4	78	0.9	1015	0	511
2013-01-24	09:15:00	25.8	78	1.3	1014.9	0	563
2013-01-24	09:30:00	25.9	77	1.3	1014.9	0	578
2013-01-24	09:45:00	26.4	76	1.3	1014.8	0	607
2013-01-24	10:00:00	26.2	77	1.3	1014.6	0	531
2013-01-24	10:15:00	26.5	75	1.3	1014.4	0	607
2013-01-24	10:30:00	27	73	1.8	1014.3	0	761
2013-01-24	10:45:00	27.6	74	2.2	1014.1	0	861
2013-01-24	11:00:00	28.1	71	2.2	1014	0	818
2013-01-24	11:15:00	27.8	69	2.7	1013.8	0	766
2013-01-24	11:30:00	27.8	69	2.7	1013.6	0	828
2013-01-24	11:45:00	28.1	71	2.2	1013.5	0	840
2013-01-24	12:00:00	28.3	68	1.8	1013.3	0	842
2013-01-24	12:15:00	28.4	69	2.2	1013.2	0	842
2013-01-24	12:30:00	28.8	68	2.7	1012.9	0	843
2013-01-24	12:45:00	28.3	68	2.7	1012.6	0	824
2013-01-24	13:00:00	28.3	69	2.7	1012.4	0	853
2013-01-24	13:15:00	28.4	69	2.7	1012.2	0	811
2013-01-24	13:30:00	28.4	68	2.2	1012.1	0	542
2013-01-24	13:45:00	28.5	69	2.7	1011.9	0	663
2013-01-24	14:00:00	28.3	68	2.7	1011.8	0	626
2013-01-24	14:15:00	28.6	67	2.7	1011.6	0	710
2013-01-24	14:30:00	29.1	68	2.2	1011.5	0	700
2013-01-24	14:45:00	28.9	66	2.7	1011.4	0	644
2013-01-24	15:00:00	28.8	67	2.2	1011.2	0	588
2013-01-24	15:15:00	28.7	72	2.7	1011.3	0	529
2013-01-24	15:30:00	28.7	70	2.7	1011.2	0	476
2013-01-24	15:45:00	28.6	69	2.7	1011.2	0	427
2013-01-24	16:00:00	28.3	69	2.7	1011.1	0	372
2013-01-24	16:15:00	28.2	68	2.7	1011.2	0	316
2013-01-24	16:30:00	27.8	70	3.1	1011.3	0	259
2013-01-24	16:45:00	27.6	73	2.7	1011.4	0	194
2013-01-24	17:00:00	27.2	71	2.7	1011.6	0	127
2013-01-24	17:15:00	26.8	74	2.7	1011.7	0	61
2013-01-24	17:30:00	26.3	75	2.7	1011.8	0	20
2013-01-24	17:45:00	25.8	77	2.2	1011.9	0	10
2013-01-24	18:00:00	25.4	80	1.3	1012.1	0	1
2013-01-24	18:15:00	25.3	79	2.2	1012.2	0	0
2013-01-24	18:30:00	24.9	81	1.3	1012.3	0	0
2013-01-24	18:45:00	24.4	84	0.4	1012.5	0	0
2013-01-24	19:00:00	24.3	83	0	1012.6	0	0
2013-01-24	19:15:00	23.3	87	0	1012.7	0	0
2013-01-24	19:30:00	23.2	87	0	1012.7	0	0
2013-01-24	19:45:00	23.3	88	0	1012.9	0	0
2013-01-24	20:00:00	23.8	86	0.4	1013	0	0
2013-01-24	20:15:00	23.7	85	0	1013.1	0	0
2013-01-24	20:30:00	23.6	86	0.4	1013.3	0	0
2013-01-24	20:45:00	23.6	86	0.4	1013.4	0	0
2013-01-24	21:00:00	23.3	88	0	1013.4	0	0
2013-01-24	21:15:00	23.3	88	0.4	1013.4	0	0
2013-01-24	21:30:00	23.2	87	0	1013.5	0	0
2013-01-24	21:45:00	23.2	89	0	1013.5	0	0
2013-01-24	22:00:00	23.1	88	0.4	1013.5	0	0
2013-01-24	22:15:00	22.9	88	0	1013.5	0	0
2013-01-24	22:30:00	22.4	90	0.4	1013.4	0	0
2013-01-24	22:45:00	22.6	90	0.4	1013.4	0	0
2013-01-24	23:00:00	22.4	91	0	1013.4	0	0
2013-01-24	23:15:00	22.2	91	0	1013.4	0	0
2013-01-24	23:30:00	22.1	91	0	1013.4	0	0
2013-01-24	23:45:00	21.9	93	0.4	1013.3	0	0
2013-01-25	00:00:00	22.1	92	0.4	1013.2	0	0
2013-01-25	00:15:00	21.8	92	0.4	1013.1	0	0
2013-01-25	00:30:00	21.6	93	0	1013.1	0	0
2013-01-25	00:45:00	21.7	93	0.4	1013	0	0
2013-01-25	01:00:00	21.7	93	0.4	1013	0	0
2013-01-25	01:15:00	21.7	93	0	1012.8	0	0
2013-01-25	01:30:00	21.6	93	0	1012.7	0	0
2013-01-25	01:45:00	21.7	93	0.4	1012.6	0	0
2013-01-25	02:00:00	21.5	93	0	1012.6	0	0
2013-01-25	02:15:00	21.5	94	0.4	1012.6	0	0
2013-01-25	02:30:00	21.6	93	0	1012.5	0	0
2013-01-25	02:45:00	21.3	94	0.4	1012.5	0	0
2013-01-25	03:00:00	21.4	94	0.4	1012.4	0	0
2013-01-25	03:15:00	21.4	94	0.4	1012.3	0	0
2013-01-25	03:30:00	21.7	93	0.4	1012.2	0	0
2013-01-25	03:45:00	21.6	93	0.4	1012.1	0	0
2013-01-25	04:00:00	21.6	94	0.4	1012	0	0
2013-01-25	04:15:00	21.5	94	0.4	1012	0	0
2013-01-25	04:30:00	21.4	94	0.4	1011.9	0	0
2013-01-25	04:45:00	21.3	95	0.4	1012	0	0
2013-01-25	05:00:00	21.3	95	0.4	1012	0	0
2013-01-25	05:15:00	21.5	95	0	1012	0	0
2013-01-25	05:30:00	21.7	94	0.4	1012	0	0
2013-01-25	05:45:00	21.7	94	0.4	1012.1	0	0
2013-01-25	06:00:00	21.7	94	0.4	1012.2	0	0
2013-01-25	06:15:00	21.7	94	0.4	1012.3	0	0
2013-01-25	06:30:00	21.8	94	0	1012.3	0	0
2013-01-25	06:45:00	22.2	93	0.4	1012.4	0	4
2013-01-25	07:00:00	22.2	93	0.4	1012.6	0	16
2013-01-25	07:15:00	22.3	94	0	1012.8	0	53
2013-01-25	07:30:00	23.7	90	0	1012.9	0	141
2013-01-25	07:45:00	24.2	88	0	1013.1	0	186
2013-01-25	08:00:00	24.7	87	0	1013.3	0	287
2013-01-25	08:15:00	25.1	85	0	1013.4	0	340
2013-01-25	08:30:00	25.5	86	0.4	1013.6	0	367
2013-01-25	08:45:00	25.8	86	0.9	1013.7	0	440
2013-01-25	09:00:00	25.9	84	0.9	1013.7	0	542
2013-01-25	09:15:00	26.3	82	0.9	1013.7	0	509
2013-01-25	09:30:00	26.2	83	1.3	1013.7	0	324
2013-01-25	09:45:00	26.6	82	0.9	1013.6	0	612
2013-01-25	10:00:00	26.7	81	0.9	1013.5	0	620
2013-01-25	10:15:00	26.8	83	0.9	1013.4	0	454
2013-01-25	10:30:00	27.4	81	0.9	1013.2	0	735
2013-01-25	10:45:00	27.5	80	1.3	1013.3	0	776
2013-01-25	11:00:00	27.6	78	1.3	1013.2	0	813
2013-01-25	11:15:00	28.1	79	1.8	1013	0	844
2013-01-25	11:30:00	28.5	76	1.3	1012.7	0	864
2013-01-25	11:45:00	28.3	77	1.8	1012.5	0	831
2013-01-25	12:00:00	28.6	75	2.2	1012.3	0	646
2013-01-25	12:15:00	28.8	73	2.7	1012.1	0	1038
2013-01-25	12:30:00	28.8	75	2.2	1011.8	0	492
2013-01-25	12:45:00	28.3	74	2.2	1011.6	0	295
2013-01-25	13:00:00	28.8	71	2.2	1011.1	0	531
2013-01-25	13:15:00	28.6	70	2.2	1010.9	0	413
2013-01-25	13:30:00	28.6	69	2.2	1010.7	0	364
2013-01-25	13:45:00	28.8	72	2.2	1010.6	0	426
2013-01-25	14:00:00	28.6	74	1.3	1010.4	0	301
2013-01-25	14:15:00	28.7	74	2.2	1010.3	0	339
2013-01-25	14:30:00	29.4	73	1.8	1010.1	0	646
2013-01-25	14:45:00	29.9	69	2.2	1010.1	0	701
2013-01-25	15:00:00	29.6	71	1.8	1010.1	0	620
2013-01-25	15:15:00	29.4	71	1.3	1010.1	0	507
2013-01-25	15:30:00	29.6	74	1.3	1010	0	409
2013-01-25	15:45:00	29	77	2.2	1010.1	0	372
2013-01-25	16:00:00	28.5	77	2.2	1010.2	0	191
2013-01-25	16:15:00	27.7	78	2.7	1010.2	0	137
2013-01-25	16:30:00	27.3	79	2.7	1010.3	0	115
2013-01-25	16:45:00	27.2	80	2.2	1010.4	0	89
2013-01-25	17:00:00	27.1	81	1.8	1010.6	0	59
2013-01-25	17:15:00	26.9	81	2.2	1010.8	0	36
2013-01-25	17:30:00	26.7	78	2.2	1011.1	0	17
2013-01-25	17:45:00	26.4	81	3.1	1011.2	0	7
2013-01-25	18:00:00	26.1	84	2.2	1011.3	0	0
2013-01-25	18:15:00	25.8	83	1.3	1011.3	0	0
2013-01-25	18:30:00	25.6	82	1.3	1011.6	0	0
2013-01-25	18:45:00	25.3	83	0.4	1011.6	0	0
2013-01-25	19:00:00	25.2	84	0	1011.7	0	0
2013-01-25	19:15:00	25.1	85	0.4	1011.9	0	0
2013-01-25	19:30:00	25	86	0	1011.9	0	0
2013-01-25	19:45:00	24.9	87	0	1011.9	0	0
2013-01-25	20:00:00	24.6	88	0	1012.1	0	0
2013-01-25	20:15:00	24.7	87	0.4	1012.2	0	0
2013-01-25	20:30:00	24.7	88	0	1012.2	0	0
2013-01-25	20:45:00	24.6	87	0.4	1012.3	0	0
2013-01-25	21:00:00	24.6	88	0.4	1012.5	0	0
2013-01-25	21:15:00	24.3	89	0	1012.6	0	0
2013-01-25	21:30:00	24.5	88	0	1012.6	0	0
2013-01-25	21:45:00	24.8	87	0.4	1012.6	0	0
2013-01-25	22:00:00	24.7	88	0.4	1012.5	0	0
2013-01-25	22:15:00	24.7	87	0	1012.4	0	0
2013-01-25	22:30:00	24.5	88	0	1012.5	0	0
2013-01-25	22:45:00	24.5	88	0	1012.3	0	0
2013-01-25	23:00:00	24.5	88	0.4	1012.3	0	0
2013-01-25	23:15:00	24.6	88	0.4	1012.1	0	0
2013-01-25	23:30:00	24.4	89	0.4	1012.1	0	0
2013-01-25	23:45:00	24.3	89	0.4	1011.9	0	0
2013-01-26	00:00:00	24.4	88	0.4	1011.9	0	0
2013-01-26	00:15:00	24.5	88	0	1011.8	0	0
2013-01-26	00:30:00	24.4	88	0	1011.6	0	0
2013-01-26	00:45:00	24.2	90	0	1011.6	0	0
2013-01-26	01:00:00	23.9	91	0.4	1011.4	0	0
2013-01-26	01:15:00	23.9	91	0.4	1011.3	0	0
2013-01-26	01:30:00	24.2	90	0	1011.2	0	0
2013-01-26	01:45:00	24.3	89	0.4	1011.1	0	0
2013-01-26	02:00:00	24.2	89	0	1010.8	0	0
2013-01-26	02:15:00	23.9	91	0.4	1010.8	0	0
2013-01-26	02:30:00	23.9	90	0.4	1010.7	0	0
2013-01-26	02:45:00	23.9	90	0.4	1010.7	0	0
2013-01-26	03:00:00	24.1	90	0	1010.7	0	0
2013-01-26	03:15:00	23.9	90	0	1010.7	0	0
2013-01-26	03:30:00	24.1	90	0	1010.7	0	0
2013-01-26	03:45:00	23.8	91	0.4	1010.7	0	0
2013-01-26	04:00:00	23.6	92	0.4	1010.8	0	0
2013-01-26	04:15:00	23.7	92	0	1011	0	0
2013-01-26	04:30:00	23.8	92	0	1011	0	0
2013-01-26	04:45:00	23.8	92	0	1011.1	0	0
2013-01-26	05:00:00	24.1	91	0	1011.3	0	0
2013-01-26	05:15:00	24.2	90	0.4	1011.5	0	0
2013-01-26	05:30:00	24.1	91	0	1011.6	0	0
2013-01-26	05:45:00	23.9	91	0	1011.7	0	0
2013-01-26	06:00:00	23.7	92	0.9	1011.7	0	0
2013-01-26	06:15:00	23.6	93	0.4	1011.8	0	0
2013-01-26	06:30:00	23.7	93	0.4	1012	0	0
2013-01-26	06:45:00	23.7	93	0.4	1012.1	0	6
2013-01-26	07:00:00	23.8	93	0	1012.3	0	27
2013-01-26	07:15:00	24	93	0.4	1012.5	0	45
2013-01-26	07:30:00	24.4	91	0	1012.6	0	76
2013-01-26	07:45:00	24.6	90	0.4	1012.7	0	90
2013-01-26	08:00:00	24.8	89	0	1012.9	0	146
2013-01-26	08:15:00	25.4	88	0.4	1012.9	0	266
2013-01-26	08:30:00	26.1	84	0.4	1013	0	388
2013-01-26	08:45:00	26.2	83	0.4	1013.1	0	439
2013-01-26	09:00:00	25.8	86	0.4	1013.2	0	197
2013-01-26	09:15:00	26.4	83	0.9	1013.2	0	462
2013-01-26	09:30:00	26.8	82	0.9	1013	0	577
2013-01-26	09:45:00	27.2	82	1.3	1013	0	625
2013-01-26	10:00:00	27.4	80	1.3	1012.9	0	660
2013-01-26	10:15:00	27.6	77	1.8	1012.8	0	699
2013-01-26	10:30:00	27.8	78	2.2	1012.7	0	731
2013-01-26	10:45:00	27.8	77	1.8	1012.4	0	753
2013-01-26	11:00:00	28.4	77	1.3	1012.4	0	771
2013-01-26	11:15:00	28.3	74	1.8	1012.2	0	785
2013-01-26	11:30:00	28.7	77	1.8	1011.9	0	814
2013-01-26	11:45:00	28.7	73	1.3	1011.7	0	813
2013-01-26	12:00:00	28.4	72	1.8	1011.6	0	455
2013-01-26	12:15:00	28.4	73	1.3	1011.5	0	498
2013-01-26	12:30:00	28.7	74	0.9	1011.3	0	490
2013-01-26	12:45:00	28.5	69	0.9	1011.1	0	400
2013-01-26	13:00:00	29	73	0.9	1010.8	0	463
2013-01-26	13:15:00	29.1	72	1.3	1010.5	0	519
2013-01-26	13:30:00	28.9	72	1.8	1010.1	0	473
2013-01-26	13:45:00	29	71	2.2	1009.9	0	496
2013-01-26	14:00:00	28.7	73	2.7	1009.9	0	403
2013-01-26	14:15:00	28.6	75	2.7	1009.9	0	376
2013-01-26	14:30:00	28.2	77	3.1	1009.8	0	186
2013-01-26	14:45:00	27.8	78	3.1	1009.9	0	192
2013-01-26	15:00:00	27.4	79	2.7	1009.9	0	137
2013-01-26	15:15:00	27.3	78	2.2	1010	0	135
2013-01-26	15:30:00	27.2	78	2.2	1010	0	131
2013-01-26	15:45:00	27	78	1.8	1010	0	126
2013-01-26	16:00:00	27.1	81	0.4	1010	0	113
2013-01-26	16:15:00	27	79	1.3	1010	0	96
2013-01-26	16:30:00	26.9	79	1.8	1010.3	0	84
2013-01-26	16:45:00	26.8	79	2.2	1010.5	0	81
2013-01-26	17:00:00	26.7	79	1.8	1010.7	0	54
2013-01-26	17:15:00	26.5	79	1.3	1010.9	0	30
2013-01-26	17:30:00	26.3	79	0.4	1011	0	16
2013-01-26	17:45:00	26.2	81	0.4	1011.2	0	6
2013-01-26	18:00:00	26.1	79	0.9	1011.4	0	0
2013-01-26	18:15:00	26	79	1.3	1011.6	0	0
2013-01-26	18:30:00	25.8	79	1.3	1011.7	0	0
2013-01-26	18:45:00	25.6	79	0.9	1011.8	0	0
2013-01-26	19:00:00	25.5	80	0	1012	0	0
2013-01-26	19:15:00	25.1	82	0	1012.2	0	0
2013-01-26	19:30:00	25.3	82	0	1012.3	0	0
2013-01-26	19:45:00	25.2	82	0	1012.6	0	0
2013-01-26	20:00:00	25.3	82	0	1012.8	0	0
2013-01-26	20:15:00	25.2	82	0.4	1013	0	0
2013-01-26	20:30:00	25.1	83	0	1013.1	0	0
2013-01-26	20:45:00	24.9	84	0.4	1013.3	0	0
2013-01-26	21:00:00	24.9	83	0.4	1013.4	0	0
2013-01-26	21:15:00	24.6	85	0	1013.3	0	0
2013-01-26	21:30:00	24.2	86	0.4	1013.4	0	0
2013-01-26	21:45:00	24	86	0	1013.5	0	0
2013-01-26	22:00:00	24.1	86	0.4	1013.5	0	0
2013-01-26	22:15:00	23.7	87	0	1013.4	0	0
2013-01-26	22:30:00	23.7	88	0	1013.4	0	0
2013-01-26	22:45:00	23.8	87	0	1013.3	0	0
2013-01-26	23:00:00	23.2	90	0	1013.2	0	0
2013-01-26	23:15:00	23.1	90	0	1013.1	0	0
2013-01-26	23:30:00	22.9	91	0	1013	0	0
2013-01-26	23:45:00	22.8	91	0	1013	0	0
2013-01-27	00:00:00	23.1	91	0.4	1013	0	0
2013-01-27	00:15:00	23.2	91	0.4	1012.9	0	0
2013-01-27	00:30:00	23.2	91	0.4	1012.9	0	0
2013-01-27	00:45:00	23.3	91	0.4	1012.8	0	0
2013-01-27	01:00:00	23.4	91	0.4	1012.7	0	0
2013-01-27	01:15:00	23.3	91	0.4	1012.5	0	0
2013-01-27	01:30:00	23.1	93	0.4	1012.3	0	0
2013-01-27	01:45:00	23.2	92	0	1012.1	0	0
2013-01-27	02:00:00	22.9	93	0.4	1012	0	0
2013-01-27	02:15:00	22.8	93	0.4	1011.9	0	0
2013-01-27	02:30:00	22.9	93	0.4	1011.9	0	0
2013-01-27	02:45:00	22.5	94	0.9	1011.9	0	0
2013-01-27	03:00:00	22.3	95	0.9	1011.9	0	0
2013-01-27	03:15:00	22.3	95	0.9	1011.9	0	0
2013-01-27	03:30:00	22.2	95	0.4	1011.9	0	0
2013-01-27	03:45:00	22.1	96	0.4	1012	0	0
2013-01-27	04:00:00	22	96	0	1012.1	0	0
2013-01-27	04:15:00	21.9	96	0.4	1012.3	0	0
2013-01-27	04:30:00	21.9	96	0	1012.3	0	0
2013-01-27	04:45:00	21.8	96	0	1012.2	0	0
2013-01-27	05:00:00	21.7	96	0.4	1012.1	0	0
2013-01-27	05:15:00	21.7	96	0.4	1012.2	0	0
2013-01-27	05:30:00	21.6	96	0	1012.3	0	0
2013-01-27	05:45:00	21.4	96	0	1012.5	0	0
2013-01-27	06:00:00	21.3	97	0	1012.6	0	0
2013-01-27	06:15:00	21.3	96	0	1012.8	0	0
2013-01-27	06:30:00	21.4	96	0	1012.9	0	2
2013-01-27	06:45:00	21.5	96	0	1013.1	0	16
2013-01-27	07:00:00	22.1	96	0	1013.2	0	53
2013-01-27	07:15:00	23.1	93	0	1013.3	0	109
2013-01-27	07:30:00	23.9	91	0	1013.4	0	164
2013-01-27	07:45:00	25.1	87	0	1013.4	0	224
2013-01-27	08:00:00	25.2	86	0	1013.5	0	282
2013-01-27	08:15:00	25.6	85	0	1013.7	0	337
2013-01-27	08:30:00	25.9	86	0.9	1013.9	0	394
2013-01-27	08:45:00	26.2	84	0.9	1013.9	0	443
2013-01-27	09:00:00	26.4	83	0.4	1013.9	0	492
2013-01-27	09:15:00	26.8	82	0.4	1013.9	0	539
2013-01-27	09:30:00	27.1	80	0.4	1013.9	0	589
2013-01-27	09:45:00	27.5	81	0.4	1013.9	0	650
2013-01-27	10:00:00	27.8	78	0.9	1013.8	0	687
2013-01-27	10:15:00	27.8	78	1.3	1013.8	0	732
2013-01-27	10:30:00	27.4	79	0.9	1013.7	0	239
2013-01-27	10:45:00	27.8	77	0.9	1013.5	0	544
2013-01-27	11:00:00	27.8	73	0.9	1013.3	0	709
2013-01-27	11:15:00	27.8	77	0.9	1013.2	0	358
2013-01-27	11:30:00	27.9	77	0.4	1013	0	386
2013-01-27	11:45:00	27.9	75	0.4	1012.8	0	381
2013-01-27	12:00:00	28	75	0.4	1012.7	0	463
2013-01-27	12:15:00	29	77	0	1012.4	0	421
2013-01-27	12:30:00	27.9	75	1.3	1012.3	0	344
2013-01-27	12:45:00	28.9	75	1.3	1012.1	0	812
2013-01-27	13:00:00	27.8	79	0.4	1012	0	224
2013-01-27	13:15:00	27.7	78	0.9	1011.7	0	238
2013-01-27	13:30:00	27.8	76	0	1011.3	0	276
2013-01-27	13:45:00	28	76	0	1011	0	247
2013-01-27	14:00:00	28.8	74	0.4	1010.7	0	437
2013-01-27	14:15:00	29	74	0.9	1010.5	0	684
2013-01-27	14:30:00	28.9	76	1.3	1010.4	0	502
2013-01-27	14:45:00	29.5	77	2.2	1010.4	0	634
2013-01-27	15:00:00	29.2	75	1.8	1010.4	0	491
2013-01-27	15:15:00	28.9	74	1.8	1010.3	0	261
2013-01-27	15:30:00	28.9	76	1.8	1010.4	0	213
2013-01-27	15:45:00	29.2	74	2.7	1010.5	0	341
2013-01-27	16:00:00	29.2	71	3.1	1010.5	0	411
2013-01-27	16:15:00	28.4	73	3.1	1010.7	0	236
2013-01-27	16:30:00	28.1	75	3.1	1010.8	0	107
2013-01-27	16:45:00	28.1	78	2.7	1011	0	147
2013-01-27	17:00:00	27.6	77	3.1	1011.1	0	84
2013-01-27	17:15:00	27.2	80	1.8	1011.3	0	51
2013-01-27	17:30:00	26.8	79	1.3	1011.4	0	36
2013-01-27	17:45:00	26.5	80	1.8	1011.7	0	10
2013-01-27	18:00:00	26.1	82	0.9	1011.8	0	2
2013-01-27	18:15:00	25.8	82	0.4	1011.9	0	0
2013-01-27	18:30:00	25.7	82	0.9	1012	0	0
2013-01-27	18:45:00	25.3	84	0.4	1012	0	0
2013-01-27	19:00:00	24.8	85	0.4	1012.2	0	0
2013-01-27	19:15:00	25	86	0	1012.4	0	0
2013-01-27	19:30:00	25.1	85	0	1012.8	0	0
2013-01-27	19:45:00	24.9	86	0	1013	0	0
2013-01-27	20:00:00	24.9	86	0	1013.2	0	0
2013-01-27	20:15:00	24.7	87	0.4	1013.2	0	0
2013-01-27	20:30:00	24.7	87	0.4	1013.4	0	0
2013-01-27	20:45:00	24.6	88	0.4	1013.6	0	0
2013-01-27	21:00:00	24.3	88	0	1013.8	0	0
2013-01-27	21:15:00	24.3	89	0	1014	0	0
2013-01-27	21:30:00	24.3	89	0.4	1014.1	0	0
2013-01-27	21:45:00	24.2	89	0.4	1014.1	0	0
2013-01-27	22:00:00	24.2	88	0.4	1014	0	0
2013-01-27	22:15:00	24.4	87	0.4	1013.9	0	0
2013-01-27	22:30:00	24.1	88	0	1014	0	0
2013-01-27	22:45:00	24.3	87	0	1013.9	0	0
2013-01-27	23:00:00	24.4	87	0.4	1014	0	0
2013-01-27	23:15:00	24.7	86	0.4	1014	0	0
2013-01-27	23:30:00	24.6	87	0.9	1014	0	0
2013-01-27	23:45:00	24.4	87	0.4	1014	0	0
2013-01-28	00:00:00	24.2	88	0.4	1014	0	0
2013-01-28	00:15:00	24.3	87	0	1013.9	0	0
2013-01-28	00:30:00	24.4	87	0.4	1013.9	0	0
2013-01-28	00:45:00	24.4	87	0.4	1013.7	0	0
2013-01-28	01:00:00	24.2	88	0	1013.4	0	0
2013-01-28	01:15:00	24.1	89	0	1013.2	0	0
2013-01-28	01:30:00	24	89	0.4	1013.1	0	0
2013-01-28	01:45:00	24.1	89	0	1012.9	0	0
2013-01-28	02:00:00	24	88	0.4	1012.7	0	0
2013-01-28	02:15:00	23.7	89	0	1012.6	0	0
2013-01-28	02:30:00	23.3	89	0	1012.6	0	0
2013-01-28	02:45:00	22.7	92	0	1012.6	0	0
2013-01-28	03:00:00	22.6	92	0	1012.5	0	0
2013-01-28	03:15:00	22.6	92	0	1012.6	0	0
2013-01-28	03:30:00	23	91	0.4	1012.7	0	0
2013-01-28	03:45:00	22.7	92	0	1012.8	0	0
2013-01-28	04:00:00	22.9	92	0	1012.8	0	0
2013-01-28	04:15:00	23.2	90	0	1012.9	0	0
2013-01-28	04:30:00	22.9	91	0	1013	0	0
2013-01-28	04:45:00	23.1	91	0.4	1013	0	0
2013-01-28	05:00:00	23.3	90	0.4	1013.2	0	0
2013-01-28	05:15:00	23.2	90	0.4	1013.2	0	0
2013-01-28	05:30:00	22.8	91	0.4	1013.3	0	0
2013-01-28	05:45:00	22.8	91	0.4	1013.4	0	0
2013-01-28	06:00:00	22.7	90	0.4	1013.6	0	0
2013-01-28	06:15:00	22.4	92	0.4	1013.7	0	0
2013-01-28	06:30:00	22.1	93	0.4	1013.8	0	1
2013-01-28	06:45:00	22.5	92	0.4	1014	0	11
2013-01-28	07:00:00	23.2	89	0	1014.2	0	28
2013-01-28	07:15:00	23.9	87	0	1014.5	0	89
2013-01-28	07:30:00	24.7	84	0.9	1014.6	0	167
2013-01-28	07:45:00	25.2	82	0.9	1014.8	0	230
2013-01-28	08:00:00	25.6	82	0.9	1014.9	0	287
2013-01-28	08:15:00	25.8	82	0.9	1015	0	323
2013-01-28	08:30:00	26.6	80	0.9	1015.3	0	398
2013-01-28	08:45:00	26.1	80	1.3	1015.4	0	321
2013-01-28	09:00:00	26.7	77	2.2	1015.5	0	494
2013-01-28	09:15:00	26.6	78	2.2	1015.5	0	295
2013-01-28	09:30:00	26.3	80	2.7	1015.6	0	302
2013-01-28	09:45:00	26.9	78	3.1	1015.6	0	633
2013-01-28	10:00:00	26.2	82	3.1	1015.5	0	227
2013-01-28	10:15:00	27.1	78	4	1015.5	0	624
2013-01-28	10:30:00	27.3	74	4	1015.3	0	778
2013-01-28	10:45:00	27.7	75	3.6	1015.1	0	803
2013-01-28	11:00:00	26.6	78	3.6	1014.9	0	169
2013-01-28	11:15:00	26.1	83	3.6	1014.8	0	236
2013-01-28	11:30:00	26.6	80	2.7	1014.6	0	345
2013-01-28	11:45:00	26.9	78	4	1014.6	0	541
2013-01-28	12:00:00	27.3	79	4	1014.4	0	1035
2013-01-28	12:15:00	26.7	78	3.6	1014.4	0	282
2013-01-28	12:30:00	27.2	77	3.6	1014.1	0	691
2013-01-28	12:45:00	26.1	81	4	1014	0	247
2013-01-28	13:00:00	27.1	78	4	1013.6	0	836
2013-01-28	13:15:00	26.6	78	3.6	1013.3	0	309
2013-01-28	13:30:00	26.4	82	3.6	1013.1	0	307
2013-01-28	13:45:00	26.8	80	4	1012.9	0	559
2013-01-28	14:00:00	26.6	81	3.6	1013	0	308
2013-01-28	14:15:00	26.6	81	3.6	1012.7	0	299
2013-01-28	14:30:00	26.1	81	3.6	1012.6	0	177
2013-01-28	14:45:00	26.5	81	4	1012.5	0	263
2013-01-28	15:00:00	26.2	81	3.6	1012.5	0	197
2013-01-28	15:15:00	25.6	84	3.6	1012.6	0	57
2013-01-28	15:30:00	25.6	84	3.1	1012.6	0	189
2013-01-28	15:45:00	25.8	82	3.1	1012.7	0	181
2013-01-28	16:00:00	25.4	83	4.9	1012.8	0	199
2013-01-28	16:15:00	25.1	83	4	1012.9	0	125
2013-01-28	16:30:00	25.1	84	3.6	1013	0	106
2013-01-28	16:45:00	25.2	83	2.7	1013.3	0	80
2013-01-28	17:00:00	24.9	86	2.7	1013.5	0.25	19
2013-01-28	17:15:00	24.2	90	2.7	1013.6	0	17
2013-01-28	17:30:00	24.2	90	0.4	1013.7	0	18
2013-01-28	17:45:00	24.3	88	0.9	1013.7	0	10
2013-01-28	18:00:00	24.1	89	1.3	1013.9	0	1
2013-01-28	18:15:00	24.1	88	0.9	1013.9	0	0
2013-01-28	18:30:00	24.2	89	0.4	1014.2	0	0
2013-01-28	18:45:00	24	89	2.7	1014.4	0.25	0
2013-01-28	19:00:00	23.4	92	1.3	1014.5	0	0
2013-01-28	19:15:00	23.4	91	0.9	1014.9	0	0
2013-01-28	19:30:00	23.5	91	1.3	1015	0	0
2013-01-28	19:45:00	23.4	90	1.3	1015.2	0	0
2013-01-28	20:00:00	23.4	90	0.9	1015.2	0	0
2013-01-28	20:15:00	23.6	90	1.3	1015.5	0	0
2013-01-28	20:30:00	23.6	89	1.3	1015.6	0	0
2013-01-28	20:45:00	23.6	89	1.8	1015.5	0	0
2013-01-28	21:00:00	23.6	89	2.2	1015.6	0	0
2013-01-28	21:15:00	23.4	89	1.3	1015.6	0	0
2013-01-28	21:30:00	23.6	88	1.8	1015.4	0	0
2013-01-28	21:45:00	23.4	89	0.9	1015.5	0	0
2013-01-28	22:00:00	23.3	88	1.3	1015.5	0	0
2013-01-28	22:15:00	23.3	88	0.4	1015.4	0	0
2013-01-28	22:30:00	23.2	89	0.4	1015.4	0	0
2013-01-28	22:45:00	23.1	89	0.4	1015.2	0	0
2013-01-28	23:00:00	23.2	89	0.9	1015.2	0	0
2013-01-28	23:15:00	23.1	88	0.4	1015.1	0	0
2013-01-28	23:30:00	22.7	90	0	1015.1	0	0
2013-01-28	23:45:00	22.6	90	0.4	1015.1	0	0
2013-01-29	00:00:00	23	89	0.4	1015	0	0
2013-01-29	00:15:00	23.5	88	0.4	1014.9	0	0
2013-01-29	00:30:00	23.3	88	0.4	1014.7	0	0
2013-01-29	00:45:00	23.1	89	0	1014.8	0	0
2013-01-29	01:00:00	23.1	89	0.4	1014.7	0	0
2013-01-29	01:15:00	23.1	88	0.4	1014.6	0	0
2013-01-29	01:30:00	23	89	0	1014.5	0	0
2013-01-29	01:45:00	23.3	88	0	1014.4	0	0
2013-01-29	02:00:00	23.1	88	0.4	1014.2	0	0
2013-01-29	02:15:00	23	88	0.4	1014.3	0	0
2013-01-29	02:30:00	22.9	89	0	1014.2	0	0
2013-01-29	02:45:00	22.7	90	0.4	1014.2	0	0
2013-01-29	03:00:00	22.6	91	0	1014	0	0
2013-01-29	03:15:00	23	89	0.4	1014.2	0	0
2013-01-29	03:30:00	22.4	90	0	1014.4	0	0
2013-01-29	03:45:00	22	92	0	1014.3	0	0
2013-01-29	04:00:00	21.9	92	0.4	1014.4	0	0
2013-01-29	04:15:00	21.6	93	0	1014.3	0	0
2013-01-29	04:30:00	21.6	93	0.4	1014.3	0	0
2013-01-29	04:45:00	21.4	93	0.4	1014.4	0	0
2013-01-29	05:00:00	21.7	92	0	1014.5	0	0
2013-01-29	05:15:00	21.8	92	0.4	1014.7	0	0
2013-01-29	05:30:00	22.2	91	0	1014.7	0	0
2013-01-29	05:45:00	22.3	90	0	1014.9	0	0
2013-01-29	06:00:00	21.6	92	0	1015	0	0
2013-01-29	06:15:00	21.4	93	0.4	1015.2	0	0
2013-01-29	06:30:00	21.4	94	0.4	1015.2	0	3
2013-01-29	06:45:00	21.4	94	0.4	1015.2	0	15
2013-01-29	07:00:00	22.1	93	0	1015.2	0	58
2013-01-29	07:15:00	23.3	89	0.4	1015.5	0	116
2013-01-29	07:30:00	23.9	86	0	1015.6	0	171
2013-01-29	07:45:00	24.3	86	0	1015.6	0	208
2013-01-29	08:00:00	24.4	86	0	1015.8	0	221
2013-01-29	08:15:00	24.4	87	0.4	1015.9	0	160
2013-01-29	08:30:00	25.4	84	0	1016	0	403
2013-01-29	08:45:00	25.4	85	0.9	1016.2	0	225
2013-01-29	09:00:00	25.6	84	1.8	1016.2	0	247
2013-01-29	09:15:00	25.8	83	1.8	1016.2	0	278
2013-01-29	09:30:00	25.6	84	1.8	1016.2	0	169
2013-01-29	09:45:00	25.5	84	2.2	1016.3	0	241
2013-01-29	10:00:00	25.6	83	2.2	1016.2	0	216
2013-01-29	10:15:00	25.6	82	3.1	1016.1	0	162
2013-01-29	10:30:00	26.2	81	3.1	1015.9	0	188
2013-01-29	10:45:00	26.7	82	3.1	1015.8	0	345
2013-01-29	11:00:00	27.4	80	3.1	1015.7	0	453
2013-01-29	11:15:00	27.6	77	3.6	1015.5	0	768
2013-01-29	11:30:00	27.4	79	3.6	1015.4	0	453
2013-01-29	11:45:00	27.8	77	4	1015.1	0	846
2013-01-29	12:00:00	27.9	77	3.6	1015	0	926
2013-01-29	12:15:00	27.9	76	3.6	1014.8	0	454
2013-01-29	12:30:00	27.9	77	4.5	1014.8	0	720
2013-01-29	12:45:00	28.3	76	4	1014.7	0	769
2013-01-29	13:00:00	27.5	78	4.5	1014.6	0	400
2013-01-29	13:15:00	28.2	76	4	1014.3	0	681
2013-01-29	13:30:00	27.4	78	4	1014.1	0	393
2013-01-29	13:45:00	27.4	78	3.6	1014	0	303
2013-01-29	14:00:00	26.5	80	4	1014	0	157
2013-01-29	14:15:00	26.4	82	4	1014	0	223
2013-01-29	14:30:00	27.1	80	3.6	1013.8	0	267
2013-01-29	14:45:00	26.8	80	3.1	1013.7	0	192
2013-01-29	15:00:00	26.9	78	4	1013.8	0	216
2013-01-29	15:15:00	26.7	77	4.5	1013.7	0	183
2013-01-29	15:30:00	26.7	78	3.6	1013.9	0	167
2013-01-29	15:45:00	26.3	83	3.6	1014	0	112
2013-01-29	16:00:00	26.1	82	3.1	1014.1	0	96
2013-01-29	16:15:00	25.6	84	3.1	1014.4	0.25	56
2013-01-29	16:30:00	25.8	83	2.2	1014.5	0	135
2013-01-29	16:45:00	25.7	83	3.1	1014.7	0	62
2013-01-29	17:00:00	25.6	83	1.8	1014.7	0	26
2013-01-29	17:15:00	25.2	85	2.2	1014.8	0	22
2013-01-29	17:30:00	24.9	85	2.2	1014.9	0	22
2013-01-29	17:45:00	24.9	85	2.2	1015	0	10
2013-01-29	18:00:00	24.8	85	2.2	1015.1	0	1
2013-01-29	18:15:00	24.7	85	2.2	1015.1	0	0
2013-01-29	18:30:00	24.6	86	1.8	1015.3	0	0
2013-01-29	18:45:00	24.1	87	2.2	1015.3	0	0
2013-01-29	19:00:00	24.1	87	1.8	1015.5	0	0
2013-01-29	19:15:00	24.1	87	1.3	1015.8	0	0
2013-01-29	19:30:00	24.1	87	1.8	1016	0	0
[truncated: 7,365 more rows]
